# Supplementary material for: Exploring Overlapping Functional Units with Various Structure in Protein Interaction Networks
Source: PubMed Central journal article supplement (PMC3423443; doi:10.1371/journal.pone.0043092), 2012-08-20
Supplement: pone.0043092.s004.pdf [file pone.0043092.s004.pdf]

## Solution to regularized sparse random graph model

The objective function of the regularized sparse random graph model (RSRGM) is:

$$\begin{cases} \min_{\theta, \psi} & -\sum_{i,j=1}^n A_{ij} \log((\theta\psi)_{ij}) + \sum_{i,j=1}^n (\theta\psi)_{ij} \\ & + \lambda \sum_{i=1}^n \sum_{k=1}^K \theta_{ik} + \lambda \sum_{k=1}^K \sum_{j=1}^n \psi_{kj} \\ & + \frac{\beta}{2} (Tr(\theta^T D \theta) + Tr(\psi D \psi^T) - 2Tr(\psi A \theta)) \\ s.t. & \theta \geq 0, \psi \geq 0. \end{cases} \quad (1)$$

Here, we use the multiplicative updating rule [2] to solve this nonnegative constrained optimization problem.

Let  $\phi_{ik}$  and  $\omega_{kj}$  be the Lagrange multipliers for constraints  $\theta_{ik} \geq 0$  and  $\psi_{kj} \geq 0$ , respectively, and  $\phi = (\phi_{ik})$ ,  $\omega = (\omega_{kj})$ . The Lagrange function  $\mathcal{L}$  is

$$\begin{aligned} \mathcal{L}(\theta, \psi, \phi, \omega) = & -\sum_{i,j=1}^n A_{ij} \log((\theta\psi)_{ij}) + \sum_{i,j=1}^n (\theta\psi)_{ij} + \lambda \sum_{i=1}^n \sum_{k=1}^K \theta_{ik} + \lambda \sum_{k=1}^K \sum_{j=1}^n \psi_{kj} \\ & + \frac{\beta}{2} (Tr(\theta^T D \theta) + Tr(\psi D \psi^T) - 2Tr(\psi A \theta)) \\ & + \sum_{i=1}^n \sum_{k=1}^K \phi_{ik} \theta_{ik} + \sum_{k=1}^K \sum_{j=1}^n \omega_{kj} \psi_{kj}. \end{aligned} \quad (2)$$

The gradients of Lagrange function  $\mathcal{L}$  with respect to  $\theta_{ik}$  and  $\psi_{kj}$  are:

$$\nabla_{\theta_{ik}} \mathcal{L} = -\sum_{j=1}^n A_{ij} \frac{\psi_{kj}}{(\theta\psi)_{ij}} + \sum_{j=1}^n \psi_{kj} + \lambda + \beta(D\theta)_{ik} - \beta(A\psi^T)_{ik} + \phi_{ik}, \quad (3)$$

and

$$\nabla_{\psi_{kj}} \mathcal{L} = -\sum_{i=1}^n A_{ij} \frac{\theta_{ik}}{(\theta\psi)_{ij}} + \sum_{i=1}^n \theta_{ik} + \lambda + \beta(\psi D)_{kj} - \beta(\theta^T A)_{kj} + \omega_{kj}. \quad (4)$$

Since the estimators of  $\theta_{ik}$  and  $\psi_{kj}$  need to satisfy  $\nabla_{\theta_{ik}} \mathcal{L} = 0$  and  $\nabla_{\psi_{kj}} \mathcal{L} = 0$ , we can get

$$\phi_{ik} = \sum_{j=1}^n A_{ij} \frac{\psi_{kj}}{(\theta\psi)_{ij}} - \sum_{j=1}^n \psi_{kj} - \lambda - \beta(D\theta)_{ik} + \beta(A\psi^T)_{ik}, \quad (5)$$

and

$$\omega_{kj} = \sum_{i=1}^n A_{ij} \frac{\theta_{ik}}{(\theta\psi)_{ij}} - \sum_{i=1}^n \theta_{ik} - \lambda - \beta(\psi D)_{kj} + \beta(\theta^T A)_{kj}. \quad (6)$$

Using the Karush-Kuhn-Tucker (KKT) conditions [1],  $\phi_{ik}\theta_{ik} = 0$  and  $\omega_{kj}\psi_{kj} = 0$ , we get the following equations for  $\theta_{ik}$  and  $\psi_{kj}$ :

$$\theta_{ik} \left( \sum_{j=1}^n \psi_{kj} + \lambda + \beta(D\theta)_{ik} \right) = \theta_{ik} \left( \sum_{j=1}^n A_{ij} \frac{\psi_{kj}}{(\theta\psi)_{ij}} + \beta(A\psi^T)_{ik} \right), \quad (7)$$

and

$$\psi_{kj} \left( \sum_{i=1}^n \theta_{ik} + \lambda + \beta(\psi D)_{kj} \right) = \psi_{kj} \left( \sum_{i=1}^n A_{ij} \frac{\theta_{ik}}{(\theta\psi)_{ij}} + \beta(\theta^T A)_{kj} \right). \quad (8)$$

Then, it is easy to obtain the updating rules:

$$\theta_{ik} \leftarrow \theta_{ik} \frac{\sum_{j=1}^n A_{ij} \frac{\psi_{kj}}{(\theta\psi)_{ij}} + \beta(A\psi^T)_{ik}}{\sum_{j=1}^n \psi_{kj} + \lambda + \beta(D\theta)_{ik}}, \quad (9)$$

and

$$\psi_{kj} \leftarrow \psi_{kj} \frac{\sum_{i=1}^n A_{ij} \frac{\theta_{ik}}{(\theta\psi)_{ij}} + \beta(\theta^T A)_{kj}}{\sum_{i=1}^n \theta_{ik} + \lambda + \beta(\psi D)_{kj}}. \quad (10)$$

By initializing  $\theta$  and  $\psi$  randomly and updating  $\theta$  and  $\psi$  alternatively according to Equations (9) and (10), respectively, we can obtain the solution to the regularized sparse random graph model (1).

## References

- [1] H.W. Kuhn and A.W. Tucker. Nonlinear programming. In *Proceedings of the second Berkeley symposium on mathematical statistics and probability*, volume 1, pages 481–492. California, 1951.

- [2] Daniel D. Lee and H. Sebastian Seung. Algorithms for non-negative matrix factorization. In *Advances in neural information processing systems*, volume 13, pages 556–562, 2001.
