# Supplementary material for: Exploring Overlapping Functional Units with Various Structure in Protein Interaction Networks
Source: PLoS One. 2012 Aug 20;7(8):e43092. doi: 10.1371/journal.pone.0043092 (PMC3423443; doi:10.1371/journal.pone.0043092)
Supplement: Table S1 — (XLS) [file pone.0043092.s001.xls]

## Sheet: MIPS_complexes
Protein	Complex ID
YMR108W	Acetolactate-synthase
YCL009C	Acetolactate-synthase
YAL029C	Actin-associated-motorproteins
YBR172C	Actin-associated-motorproteins
YOR326W	Actin-associated-motorproteins
YHR023W	Actin-associated-motorproteins
YMR109W	Actin-associated-motorproteins
YKL079W	Actin-associated-motorproteins
YKL129C	Actin-associated-motorproteins
YHR179W	Actin-associated-proteins
YIL034C	Actin-associated-proteins
YLL050C	Actin-associated-proteins
YLR337C	Actin-associated-proteins
YLR319C	Actin-associated-proteins
YIL138C	Actin-associated-proteins
YKL007W	Actin-associated-proteins
YIR006C	Actin-associated-proteins
YLR429W	Actin-associated-proteins
YNL079C	Actin-associated-proteins
YNL243W	Actin-associated-proteins
YOR181W	Actin-associated-proteins
YOR122C	Actin-associated-proteins
YNL138W	Actin-associated-proteins
YMR092C	Actin-associated-proteins
YGR080W	Actin-associated-proteins
YBL007C	Actin-associated-proteins
YBR200W	Actin-associated-proteins
YCR088W	Actin-associated-proteins
YDL178W	Actin-associated-proteins
YDR388W	Actin-associated-proteins
YDR129C	Actin-associated-proteins
YDL029W	Actin-associated-proteins
YCL040W	Actin-associated-proteins
YBR234C	Actin-associated-proteins
YOL148C	ADA-complex
YDR448W	ADA-complex
YGR252W	ADA-complex
YHR099W	ADA-complex
YPL254W	ADA-complex
YDR176W	ADA-complex
YGL032C	Alpha-agglutinin-anchor
YNR044W	Alpha-agglutinin-anchor
YML100W	Alpha-alpha-trehalose-phosphate-synthase
YMR261C	Alpha-alpha-trehalose-phosphate-synthase
YBR126C	Alpha-alpha-trehalose-phosphate-synthase
YDR074W	Alpha-alpha-trehalose-phosphate-synthase
YBL084C	Anaphase-promoting-complex
YDR118W	Anaphase-promoting-complex
YDL008W	Anaphase-promoting-complex
YFR036W	Anaphase-promoting-complex
YGL240W	Anaphase-promoting-complex
YNL172W	Anaphase-promoting-complex
YOR249C	Anaphase-promoting-complex
YHR166C	Anaphase-promoting-complex
YLR127C	Anaphase-promoting-complex
YLR102C	Anaphase-promoting-complex
YKL022C	Anaphase-promoting-complex
YKL211C	Anthranilate-synthase
YER090W	Anthranilate-synthase
YPL259C	AP-1-complex
YPR029C	AP-1-complex
YKL135C	AP-1-complex
YLR170C	AP-1-complex
YJR005W	AP-2-complex
YJR058C	AP-2-complex
YOL062C	AP-2-complex
YBL037W	AP-2-complex
YBR288C	AP-3-complex
YPL195W	AP-3-complex
YGR261C	AP-3-complex
YJL024C	AP-3-complex
YML099C	ARG-complex
YMR042W	ARG-complex
YMR043W	ARG-complex
YDR173C	ARG-complex
YOR303W	Arginine-specific-carbamoylphosphate-synthase
YJR109C	Arginine-specific-carbamoylphosphate-synthase
YIL062C	Arp2p-Arp3p-complex
YLR370C	Arp2p-Arp3p-complex
YKL013C	Arp2p-Arp3p-complex
YJR065C	Arp2p-Arp3p-complex
YNR035C	Arp2p-Arp3p-complex
YDL029W	Arp2p-Arp3p-complex
YBL078C	Aut2p-Aut7p-complex
YNL223W	Aut2p-Aut7p-complex
YLR433C	Calcineurin-B
YML057W	Calcineurin-B
YKL190W	Calcineurin-B
YIL033C	cAMP-dependent-protein-kinase
YKL166C	cAMP-dependent-protein-kinase
YJL164C	cAMP-dependent-protein-kinase
YPL203W	cAMP-dependent-protein-kinase
YPL204W	Casein-kinase
YER123W	Casein-kinase
YHR135C	Casein-kinase
YGL019W	Casein-kinase
YIL035C	Casein-kinase
YNL154C	Casein-kinase
YOR061W	Casein-kinase
YOR039W	Casein-kinase
YNL154C	Casein-kinase-I
YER123W	Casein-kinase-I
YHR135C	Casein-kinase-I
YPL204W	Casein-kinase-I
YGL019W	Casein-kinase-II
YOR039W	Casein-kinase-II
YOR061W	Casein-kinase-II
YIL035C	Casein-kinase-II
YGR088W	Catalase
YDR256C	Catalase
YIR017C	Cbf1-Met4-Met28-complex
YJR060W	Cbf1-Met4-Met28-complex
YNL103W	Cbf1-Met4-Met28-complex
YKL109W	CCAAT-binding-factor-complex
YBL021C	CCAAT-binding-factor-complex
YOR358W	CCAAT-binding-factor-complex
YGL237C	CCAAT-binding-factor-complex
YER068W	CCR4-complex
YFL028C	CCR4-complex
YGR092W	CCR4-complex
YPR072W	CCR4-complex
YAL021C	CCR4-complex
YDL160C	CCR4-complex
YDL165W	CCR4-complex
YCR093W	CCR4-complex
YIL038C	CCR4-complex
YKR036C	CCR4-complex
YJR122W	CCR4-complex
YIL106W	CCR4-complex
YNR052C	CCR4-complex
YMR199W	Cdc28p-complexes
YLR210W	Cdc28p-complexes
YAL040C	Cdc28p-complexes
YDL155W	Cdc28p-complexes
YBR160W	Cdc28p-complexes
YPL256C	Cdc28p-complexes
YPR119W	Cdc28p-complexes
YPR120C	Cdc28p-complexes
YGR108W	Cdc28p-complexes
YGR109C	Cdc28p-complexes
YGR140W	CENIII-complex
YDR328C	CENIII-complex
YMR094W	CENIII-complex
YMR168C	CENIII-complex
YIL142W	Chaperonine-containing-T-complex-TRiC
YJL111W	Chaperonine-containing-T-complex-TRiC
YJR064W	Chaperonine-containing-T-complex-TRiC
YJL008C	Chaperonine-containing-T-complex-TRiC
YJL014W	Chaperonine-containing-T-complex-TRiC
YDL143W	Chaperonine-containing-T-complex-TRiC
YDR212W	Chaperonine-containing-T-complex-TRiC
YDR188W	Chaperonine-containing-T-complex-TRiC
YBR195C	Chromatin-assembly-complex
YPR018W	Chromatin-assembly-complex
YML102W	Chromatin-assembly-complex
YMR231W	Class-C-Vps-protein-complex
YLR148W	Class-C-Vps-protein-complex
YLR396C	Class-C-Vps-protein-complex
YPL045W	Class-C-Vps-protein-complex
YGL206C	Clathrin
YGR167W	Clathrin
YML012W	Coat-complexes
YNL287W	Coat-complexes
YOR069W	Coat-complexes
YOR132W	Coat-complexes
YIL076W	Coat-complexes
YIL109C	Coat-complexes
YLR208W	Coat-complexes
YJL154C	Coat-complexes
YJL053W	Coat-complexes
YAL007C	Coat-complexes
YAL042W	Coat-complexes
YDL192W	Coat-complexes
YDR170C	Coat-complexes
YDR238C	Coat-complexes
YDL195W	Coat-complexes
YDL145C	Coat-complexes
YAR002C-A	Coat-complexes
YPL010W	Coat-complexes
YPL218W	Coat-complexes
YPR181C	Coat-complexes
YPL085W	Coat-complexes
YFR051C	Coat-complexes
YGL200C	Coat-complexes
YHR012W	Coat-complexes
YGL137W	Coat-complexes
YER148W	Core-Factor
YBL014C	Core-Factor
YJL025W	Core-Factor
YML043C	Core-Factor
YDR529C	Cytochrome-bc1-complex
YFR033C	Cytochrome-bc1-complex
YHR001W-A	Cytochrome-bc1-complex
YGR183C	Cytochrome-bc1-complex
YEL024W	Cytochrome-bc1-complex
YPR191W	Cytochrome-bc1-complex
YBL045C	Cytochrome-bc1-complex
YJL166W	Cytochrome-bc1-complex
YOR065W	Cytochrome-bc1-complex
YMR256C	Cytochrome-c-oxidase
YNL052W	Cytochrome-c-oxidase
YLR038C	Cytochrome-c-oxidase
YLR395C	Cytochrome-c-oxidase
YDL067C	Cytochrome-c-oxidase
YGL187C	Cytochrome-c-oxidase
YHR051W	Cytochrome-c-oxidase
YGL191W	Cytochrome-c-oxidase
YDR418W	cytoplasmic-ribosomal-large-subunit
YEL054C	cytoplasmic-ribosomal-large-subunit
YGR148C	cytoplasmic-ribosomal-large-subunit
YGL076C	cytoplasmic-ribosomal-large-subunit
YGL031C	cytoplasmic-ribosomal-large-subunit
YGL030W	cytoplasmic-ribosomal-large-subunit
YFR032C-A	cytoplasmic-ribosomal-large-subunit
YFR031C-A	cytoplasmic-ribosomal-large-subunit
YFL034C-A	cytoplasmic-ribosomal-large-subunit
YER117W	cytoplasmic-ribosomal-large-subunit
YER056C-A	cytoplasmic-ribosomal-large-subunit
YDR471W	cytoplasmic-ribosomal-large-subunit
YHR141C	cytoplasmic-ribosomal-large-subunit
YHR010W	cytoplasmic-ribosomal-large-subunit
YHL033C	cytoplasmic-ribosomal-large-subunit
YHL001W	cytoplasmic-ribosomal-large-subunit
YGR085C	cytoplasmic-ribosomal-large-subunit
YGR034W	cytoplasmic-ribosomal-large-subunit
YGL147C	cytoplasmic-ribosomal-large-subunit
YGL135W	cytoplasmic-ribosomal-large-subunit
YGL103W	cytoplasmic-ribosomal-large-subunit
YDR500C	cytoplasmic-ribosomal-large-subunit
YBL027W	cytoplasmic-ribosomal-large-subunit
YBL087C	cytoplasmic-ribosomal-large-subunit
YBL092W	cytoplasmic-ribosomal-large-subunit
YDR382W	cytoplasmic-ribosomal-large-subunit
YDR012W	cytoplasmic-ribosomal-large-subunit
YDL191W	cytoplasmic-ribosomal-large-subunit
YDL184C	cytoplasmic-ribosomal-large-subunit
YDL136W	cytoplasmic-ribosomal-large-subunit
YDL133C-A	cytoplasmic-ribosomal-large-subunit
YDL130W	cytoplasmic-ribosomal-large-subunit
YDL082W	cytoplasmic-ribosomal-large-subunit
YDL081C	cytoplasmic-ribosomal-large-subunit
YDL075W	cytoplasmic-ribosomal-large-subunit
YBR191W	cytoplasmic-ribosomal-large-subunit
YBR084C-A	cytoplasmic-ribosomal-large-subunit
YBR031W	cytoplasmic-ribosomal-large-subunit
YOR312C	cytoplasmic-ribosomal-large-subunit
YPR043W	cytoplasmic-ribosomal-large-subunit
YPR102C	cytoplasmic-ribosomal-large-subunit
YPL220W	cytoplasmic-ribosomal-large-subunit
YPL249C-A	cytoplasmic-ribosomal-large-subunit
YPL143W	cytoplasmic-ribosomal-large-subunit
YPL198W	cytoplasmic-ribosomal-large-subunit
YPL131W	cytoplasmic-ribosomal-large-subunit
YPL079W	cytoplasmic-ribosomal-large-subunit
YIL018W	cytoplasmic-ribosomal-large-subunit
YLR340W	cytoplasmic-ribosomal-large-subunit
YLR325C	cytoplasmic-ribosomal-large-subunit
YLR185W	cytoplasmic-ribosomal-large-subunit
YLR075W	cytoplasmic-ribosomal-large-subunit
YLR061W	cytoplasmic-ribosomal-large-subunit
YLR029C	cytoplasmic-ribosomal-large-subunit
YLL045C	cytoplasmic-ribosomal-large-subunit
YKR094C	cytoplasmic-ribosomal-large-subunit
YKL180W	cytoplasmic-ribosomal-large-subunit
YLR406C	cytoplasmic-ribosomal-large-subunit
YLR344W	cytoplasmic-ribosomal-large-subunit
YIL148W	cytoplasmic-ribosomal-large-subunit
YJL177W	cytoplasmic-ribosomal-large-subunit
YJL189W	cytoplasmic-ribosomal-large-subunit
YKL006W	cytoplasmic-ribosomal-large-subunit
YJR094W-A	cytoplasmic-ribosomal-large-subunit
YIL133C	cytoplasmic-ribosomal-large-subunit
YIL052C	cytoplasmic-ribosomal-large-subunit
YLR448W	cytoplasmic-ribosomal-large-subunit
YNL069C	cytoplasmic-ribosomal-large-subunit
YOR234C	cytoplasmic-ribosomal-large-subunit
YOR063W	cytoplasmic-ribosomal-large-subunit
YOL127W	cytoplasmic-ribosomal-large-subunit
YOL120C	cytoplasmic-ribosomal-large-subunit
YOL039W	cytoplasmic-ribosomal-large-subunit
YNL301C	cytoplasmic-ribosomal-large-subunit
YNL162W	cytoplasmic-ribosomal-large-subunit
YNL067W	cytoplasmic-ribosomal-large-subunit
YMR142C	cytoplasmic-ribosomal-large-subunit
YMR242C	cytoplasmic-ribosomal-large-subunit
YMR194W	cytoplasmic-ribosomal-large-subunit
YMR121C	cytoplasmic-ribosomal-large-subunit
YML073C	cytoplasmic-ribosomal-large-subunit
YLR441C	cytoplasmic-ribosomal-small-subunit
YOR182C	cytoplasmic-ribosomal-small-subunit
YOR167C	cytoplasmic-ribosomal-small-subunit
YOR096W	cytoplasmic-ribosomal-small-subunit
YOL121C	cytoplasmic-ribosomal-small-subunit
YOL040C	cytoplasmic-ribosomal-small-subunit
YNL302C	cytoplasmic-ribosomal-small-subunit
YNL178W	cytoplasmic-ribosomal-small-subunit
YNL096C	cytoplasmic-ribosomal-small-subunit
YMR143W	cytoplasmic-ribosomal-small-subunit
YMR116C	cytoplasmic-ribosomal-small-subunit
YML024W	cytoplasmic-ribosomal-small-subunit
YMR230W	cytoplasmic-ribosomal-small-subunit
YML063W	cytoplasmic-ribosomal-small-subunit
YML026C	cytoplasmic-ribosomal-small-subunit
YHR203C	cytoplasmic-ribosomal-small-subunit
YLR388W	cytoplasmic-ribosomal-small-subunit
YLR367W	cytoplasmic-ribosomal-small-subunit
YLR287C-A	cytoplasmic-ribosomal-small-subunit
YLR264W	cytoplasmic-ribosomal-small-subunit
YLR167W	cytoplasmic-ribosomal-small-subunit
YLR048W	cytoplasmic-ribosomal-small-subunit
YKR057W	cytoplasmic-ribosomal-small-subunit
YKL156W	cytoplasmic-ribosomal-small-subunit
YJR145C	cytoplasmic-ribosomal-small-subunit
YJR123W	cytoplasmic-ribosomal-small-subunit
YJL191W	cytoplasmic-ribosomal-small-subunit
YLR333C	cytoplasmic-ribosomal-small-subunit
YJL190C	cytoplasmic-ribosomal-small-subunit
YJL136C	cytoplasmic-ribosomal-small-subunit
YIL069C	cytoplasmic-ribosomal-small-subunit
YOR293W	cytoplasmic-ribosomal-small-subunit
YOR369C	cytoplasmic-ribosomal-small-subunit
YPR132W	cytoplasmic-ribosomal-small-subunit
YPL090C	cytoplasmic-ribosomal-small-subunit
YPL081W	cytoplasmic-ribosomal-small-subunit
YBL072C	cytoplasmic-ribosomal-small-subunit
YBR048W	cytoplasmic-ribosomal-small-subunit
YDR064W	cytoplasmic-ribosomal-small-subunit
YDR025W	cytoplasmic-ribosomal-small-subunit
YDL083C	cytoplasmic-ribosomal-small-subunit
YCR031C	cytoplasmic-ribosomal-small-subunit
YDL061C	cytoplasmic-ribosomal-small-subunit
YBR189W	cytoplasmic-ribosomal-small-subunit
YBR181C	cytoplasmic-ribosomal-small-subunit
YDR447C	cytoplasmic-ribosomal-small-subunit
YER131W	cytoplasmic-ribosomal-small-subunit
YHR021C	cytoplasmic-ribosomal-small-subunit
YHL015W	cytoplasmic-ribosomal-small-subunit
YGR214W	cytoplasmic-ribosomal-small-subunit
YGR118W	cytoplasmic-ribosomal-small-subunit
YGR027C	cytoplasmic-ribosomal-small-subunit
YGL189C	cytoplasmic-ribosomal-small-subunit
YGL123W	cytoplasmic-ribosomal-small-subunit
YER102W	cytoplasmic-ribosomal-small-subunit
YER074W	cytoplasmic-ribosomal-small-subunit
YDR450W	cytoplasmic-ribosomal-small-subunit
YBR143C	Cytoplasmic-translation-termination
YDR172W	Cytoplasmic-translation-termination
YLR288C	Ddc1p-Mec3p-complex
YPL194W	Ddc1p-Mec3p-complex
YER176W	DNA-helicases
YHR164C	DNA-helicases
YGL090W	DNA-ligase-IV
YOR005C	DNA-ligase-IV
YMR167W	DNA-mismatch-repair-complexes
YNL082W	DNA-mismatch-repair-complexes
YOL090W	DNA-mismatch-repair-complexes
YCR092C	DNA-mismatch-repair-complexes
YDR097C	DNA-mismatch-repair-complexes
YBL035C	DNA-polymerase-alphaI-primase-complex
YNL102W	DNA-polymerase-alphaI-primase-complex
YIR008C	DNA-polymerase-alphaI-primase-complex
YKL045W	DNA-polymerase-alphaI-primase-complex
YJR006W	DNA-polymerase-deltaIII
YJR043C	DNA-polymerase-deltaIII
YDL102W	DNA-polymerase-deltaIII
YBR278W	DNA-polymerase-epsilonII
YPR175W	DNA-polymerase-epsilonII
YNL262W	DNA-polymerase-epsilonII
YIL139C	DNA-polymerase-zeta
YPL167C	DNA-polymerase-zeta
YMR294W	Dynactin-complex
YHR129C	Dynactin-complex
YPL174C	Dynactin-complex
YDR424C	Dynein-complex-motorproteins
YDR488C	Dynein-complex-motorproteins
YKR054C	Dynein-complex-motorproteins
YKL081W	eEF1
YKR084C	eEF1
YPL048W	eEF1
YPR080W	eEF1
YAL003W	eEF1
YBR118W	eEF1
YDR385W	eEF2
YOR133W	eEF2
YJR007W	eIF2
YPL237W	eIF2
YER025W	eIF2
YGR083C	eIF2B
YOR260W	eIF2B
YDR211W	eIF2B
YKR026C	eIF2B
YLR291C	eIF2B
YMR146C	eIF3
YNL244C	eIF3
YNL062C	eIF3
YMR309C	eIF3
YBR079C	eIF3
YOR361C	eIF3
YDR429C	eIF3
YJL138C	eIF4A
YKR059W	eIF4A
YOL139C	eIF4E-eIF4G-Pab1p-complex
YER165W	eIF4E-eIF4G-Pab1p-complex
YGR162W	eIF4E-eIF4G-Pab1p-complex
YGL049C	eIF4F
YGR162W	eIF4F
YOR276W	eIF4F
YEL034W	eIF5A
YJR047C	eIF5A
YKL119C	ER-assembly-complex
YHR060W	ER-assembly-complex
YER019C-A	ER-protein-translocation-complex
YER087C-B	ER-protein-translocation-complex
YPL094C	ER-protein-translocation-complex
YBR171W	ER-protein-translocation-complex
YDR086C	ER-protein-translocation-complex
YJL034W	ER-protein-translocation-complex
YLR378C	ER-protein-translocation-complex
YLR292C	ER-protein-translocation-complex
YOR254C	ER-protein-translocation-complex
YIL068C	Exocyst-complex
YLR166C	Exocyst-complex
YJL085W	Exocyst-complex
YDR166C	Exocyst-complex
YPR055W	Exocyst-complex
YER008C	Exocyst-complex
YGL233W	Exocyst-complex
YGR095C	Exosome-complex
YHR069C	Exosome-complex
YGR195W	Exosome-complex
YCR035C	Exosome-complex
YDL111C	Exosome-complex
YDR280W	Exosome-complex
YOL021C	Exosome-complex
YKL019W	Farnesyltransferase
YDL090C	Farnesyltransferase
YPL231W	Fatty-acid-synthetase-cytoplasmic
YKL182W	Fatty-acid-synthetase-cytoplasmic
YJR121W	F0-F1-ATP-synthase
YLR295C	F0-F1-ATP-synthase
YKL016C	F0-F1-ATP-synthase
YML081C-A	F0-F1-ATP-synthase
YOL077W-A	F0-F1-ATP-synthase
YPL078C	F0-F1-ATP-synthase
YPL271W	F0-F1-ATP-synthase
YPR020W	F0-F1-ATP-synthase
YBL099W	F0-F1-ATP-synthase
YBR039W	F0-F1-ATP-synthase
YDR298C	F0-F1-ATP-synthase
YDR377W	F0-F1-ATP-synthase
YDR322C-A	F0-F1-ATP-synthase
YDL181W	F0-F1-ATP-synthase
YDL004W	F0-F1-ATP-synthase
YDR009W	GAL80-complex
YPL248C	GAL80-complex
YML051W	GAL80-complex
YNL126W	gamma-tubulin-complex
YHR172W	gamma-tubulin-complex
YLR212C	gamma-tubulin-complex
YNL199C	GCR-complex
YPL075W	GCR-complex
YGL155W	Geranylgeranyltransferase-I
YKL019W	Geranylgeranyltransferase-I
YJL031C	Geranylgeranyltransferase-II
YOR370C	Geranylgeranyltransferase-II
YPR176C	Geranylgeranyltransferase-II
YEL003W	Gim-complexes
YGR078C	Gim-complexes
YLR200W	Gim-complexes
YML094W	Gim-complexes
YNL153C	Gim-complexes
YLR342W	Glucan-synthases
YGR032W	Glucan-synthases
YGR143W	Glucan-synthases
YPR159W	Glucan-synthases
YCR034W	Glucan-synthases
YAL044C	Glycine-decarboxylase
YDR019C	Glycine-decarboxylase
YFL018C	Glycine-decarboxylase
YMR189W	Glycine-decarboxylase
YMR236W	HAT-A-complexes
YOR244W	HAT-A-complexes
YOL148C	HAT-A-complexes
YLR055C	HAT-A-complexes
YDR392W	HAT-A-complexes
YGL112C	HAT-A-complexes
YGR252W	HAT-A-complexes
YDR448W	HAT-A-complexes
YHR099W	HAT-A-complexes
YBR081C	HAT-A-complexes
YDR176W	HAT-A-complexes
YDR167W	HAT-A-complexes
YBR198C	HAT-A-complexes
YDR145W	HAT-A-complexes
YPL254W	HAT-A-complexes
YPL001W	HAT-B-complex
YEL056W	HAT-B-complex
YEL017C-A	H+-ATPase-plasma-mebrane
YGL008C	H+-ATPase-plasma-mebrane
YPL036W	H+-ATPase-plasma-mebrane
YCR024C-A	H+-ATPase-plasma-mebrane
YMR263W	HDB-complex
YNL330C	HDB-complex
YOL004W	HDB-complex
YMR263W	Histone-deacetylase-complexes
YNL021W	Histone-deacetylase-complexes
YOL004W	Histone-deacetylase-complexes
YNL330C	Histone-deacetylase-complexes
YLR447C	H+-transporting-ATPase-vacuolar
YMR054W	H+-transporting-ATPase-vacuolar
YKL080W	H+-transporting-ATPase-vacuolar
YEL027W	H+-transporting-ATPase-vacuolar
YGR020C	H+-transporting-ATPase-vacuolar
YHR039C-A	H+-transporting-ATPase-vacuolar
YHR026W	H+-transporting-ATPase-vacuolar
YEL051W	H+-transporting-ATPase-vacuolar
YOR270C	H+-transporting-ATPase-vacuolar
YOR332W	H+-transporting-ATPase-vacuolar
YPL234C	H+-transporting-ATPase-vacuolar
YPR036W	H+-transporting-ATPase-vacuolar
YBR127C	H+-transporting-ATPase-vacuolar
YDL185W	H+-transporting-ATPase-vacuolar
YDL184W-B	H+-transporting-ATPase-vacuolar
YMR035W	Inner-membrane-protease
YMR150C	Inner-membrane-protease
YNL037C	Isocitrate-dehydrogenase
YOR136W	Isocitrate-dehydrogenase
YGR238C	Kel1p-Kel2p-complex
YHR158C	Kel1p-Kel2p-complex
YEL061C	Kinesin-related-motorproteins
YGL005C	Kinesin-related-motorproteins
YGL216W	Kinesin-related-motorproteins
YHR156C	Kinesin-related-motorproteins
YBL063W	Kinesin-related-motorproteins
YPL155C	Kinesin-related-motorproteins
YPR141C	Kinesin-related-motorproteins
YMR198W	Kinesin-related-motorproteins
YDL108W	Kin28p-complex
YPR025C	Kin28p-complex
YPL129W	Kornbergs-mediator-complex
YPR168W	Kornbergs-mediator-complex
YBL093C	Kornbergs-mediator-complex
YBR253W	Kornbergs-mediator-complex
YDR308C	Kornbergs-mediator-complex
YDL005C	Kornbergs-mediator-complex
YBR193C	Kornbergs-mediator-complex
YER022W	Kornbergs-mediator-complex
YER179W	Kornbergs-mediator-complex
YGL151W	Kornbergs-mediator-complex
YHR041C	Kornbergs-mediator-complex
YHR058C	Kornbergs-mediator-complex
YGR104C	Kornbergs-mediator-complex
YGL025C	Kornbergs-mediator-complex
YLR071C	Kornbergs-mediator-complex
YMR112C	Kornbergs-mediator-complex
YOR174W	Kornbergs-mediator-complex
YOL135C	Kornbergs-mediator-complex
YOL051W	Kornbergs-mediator-complex
YNR010W	Kornbergs-mediator-complex
YNL236W	Kornbergs-mediator-complex
YMR106C	Ku-complex
YMR284W	Ku-complex
YGL154C	L-aminopadipate-semialdehyde-dehydrogenase
YBR115C	L-aminopadipate-semialdehyde-dehydrogenase
YER017C	m-AAA-protease-complex
YMR089C	m-AAA-protease-complex
YLR182W	MBF-complex
YDL056W	MBF-complex
YNL103W	Met4-Met28-Met31-complex
YIR017C	Met4-Met28-Met31-complex
YPL038W	Met4-Met28-Met31-complex
YDR253C	Met4-Met28-Met32-complex
YIR017C	Met4-Met28-Met32-complex
YNL103W	Met4-Met28-Met32-complex
YML085C	Microtubules
YML124C	Microtubules
YMR198W	Microtubules
YMR294W	Microtubules
YOR058C	Microtubules
YNL223W	Microtubules
YNL126W	Microtubules
YMR138W	Microtubules
YJL042W	Microtubules
YKR054C	Microtubules
YLR045C	Microtubules
YLR212C	Microtubules
YLR175W	Microtubules
YBL034C	Microtubules
YBL078C	Microtubules
YBL063W	Microtubules
YCL029C	Microtubules
YOR265W	Microtubules
YPL155C	Microtubules
YOR272W	Microtubules
YPL241C	Microtubules
YPR141C	Microtubules
YPL174C	Microtubules
YDR424C	Microtubules
YHR156C	Microtubules
YHR129C	Microtubules
YGL216W	Microtubules
YGL005C	Microtubules
YER016W	Microtubules
YDR488C	Microtubules
YEL061C	Microtubules
YFL037W	Microtubules
YHL038C	Mitochondrial-processing-complexes
YDL069C	Mitochondrial-processing-complexes
YDR197W	Mitochondrial-processing-complexes
YJL209W	Mitochondrial-processing-complexes
YJL063C	mitochondrial-ribosomal-large-subunit
YKL138C	mitochondrial-ribosomal-large-subunit
YKL170W	mitochondrial-ribosomal-large-subunit
YLR312W-A	mitochondrial-ribosomal-large-subunit
YKR085C	mitochondrial-ribosomal-large-subunit
YKR006C	mitochondrial-ribosomal-large-subunit
YKL167C	mitochondrial-ribosomal-large-subunit
YJL096W	mitochondrial-ribosomal-large-subunit
YLR439W	mitochondrial-ribosomal-large-subunit
YMR193W	mitochondrial-ribosomal-large-subunit
YNL252C	mitochondrial-ribosomal-large-subunit
YOR150W	mitochondrial-ribosomal-large-subunit
YNL284C	mitochondrial-ribosomal-large-subunit
YNL185C	mitochondrial-ribosomal-large-subunit
YMR286W	mitochondrial-ribosomal-large-subunit
YNL005C	mitochondrial-ribosomal-large-subunit
YMR225C	mitochondrial-ribosomal-large-subunit
YMR024W	mitochondrial-ribosomal-large-subunit
YBL038W	mitochondrial-ribosomal-large-subunit
YBR268W	mitochondrial-ribosomal-large-subunit
YBR282W	mitochondrial-ribosomal-large-subunit
YBR122C	mitochondrial-ribosomal-large-subunit
YDR237W	mitochondrial-ribosomal-large-subunit
YDR322W	mitochondrial-ribosomal-large-subunit
YDL202W	mitochondrial-ribosomal-large-subunit
YCR003W	mitochondrial-ribosomal-large-subunit
YPL173W	mitochondrial-ribosomal-large-subunit
YDR405W	mitochondrial-ribosomal-large-subunit
YHR147C	mitochondrial-ribosomal-large-subunit
YDR462W	mitochondrial-ribosomal-large-subunit
YGR076C	mitochondrial-ribosomal-large-subunit
YGR220C	mitochondrial-ribosomal-large-subunit
YFR049W	mitochondrial-ribosomal-small-subunit
YGR084C	mitochondrial-ribosomal-small-subunit
YHR075C	mitochondrial-ribosomal-small-subunit
YHL004W	mitochondrial-ribosomal-small-subunit
YPR166C	mitochondrial-ribosomal-small-subunit
YBR146W	mitochondrial-ribosomal-small-subunit
YDR337W	mitochondrial-ribosomal-small-subunit
YDR347W	mitochondrial-ribosomal-small-subunit
YBR251W	mitochondrial-ribosomal-small-subunit
YDL045W-A	mitochondrial-ribosomal-small-subunit
YNL306W	mitochondrial-ribosomal-small-subunit
YOR158W	mitochondrial-ribosomal-small-subunit
YKL003C	mitochondrial-ribosomal-small-subunit
YKL142W	mitochondrial-ribosomal-small-subunit
YGR222W	Mitochondrial-splicing-complexes
YHR005C-A	Mitochondrial-splicing-complexes
YOR334W	Mitochondrial-splicing-complexes
YPR134W	Mitochondrial-splicing-complexes
YPL029W	Mitochondrial-splicing-complexes
YBR120C	Mitochondrial-splicing-complexes
YDR194C	Mitochondrial-splicing-complexes
YDL044C	Mitochondrial-splicing-complexes
YMR023C	Mitochondrial-splicing-complexes
YMR287C	Mitochondrial-splicing-complexes
YIR021W	Mitochondrial-splicing-complexes
YJL133W	Mitochondrial-splicing-complexes
YLR382C	Mitochondrial-splicing-complexes
YKR052C	Mitochondrial-splicing-complexes
YLR067C	Mitochondrial-translation-complexes
YLR203C	Mitochondrial-translation-complexes
YMR023C	Mitochondrial-translation-complexes
YMR064W	Mitochondrial-translation-complexes
YMR257C	Mitochondrial-translation-complexes
YNR045W	Mitochondrial-translation-complexes
YMR282C	Mitochondrial-translation-complexes
YBL080C	Mitochondrial-translation-complexes
YBR120C	Mitochondrial-translation-complexes
YDR197W	Mitochondrial-translation-complexes
YDL069C	Mitochondrial-translation-complexes
YPL029W	Mitochondrial-translation-complexes
YER153C	Mitochondrial-translation-complexes
YGL023C	Mitochondrial-translation-complexes
YGR222W	Mitochondrial-translation-complexes
YMR287C	mitochondrial-3-to-5-exoribonuclease
YPL029W	mitochondrial-3-to-5-exoribonuclease
YDR369C	MRE11-RAD50-XRS2-complex
YMR224C	MRE11-RAD50-XRS2-complex
YNL250W	MRE11-RAD50-XRS2-complex
YPL228W	mRNA-guanylyl-transferase
YGL130W	mRNA-guanylyl-transferase
YER013W	mRNA-splicing
YGR074W	mRNA-splicing
YGR091W	mRNA-splicing
YGR075C	mRNA-splicing
YGR006W	mRNA-splicing
YGL120C	mRNA-splicing
YER172C	mRNA-splicing
YER112W	mRNA-splicing
YPL178W	mRNA-splicing
YPR178W	mRNA-splicing
YPR101W	mRNA-splicing
YPR057W	mRNA-splicing
YBL074C	mRNA-splicing
YBR055C	mRNA-splicing
YBR142W	mRNA-splicing
YDL030W	mRNA-splicing
YDR088C	mRNA-splicing
YDR364C	mRNA-splicing
YDR243C	mRNA-splicing
YDL043C	mRNA-splicing
YBR237W	mRNA-splicing
YBR152W	mRNA-splicing
YML046W	mRNA-splicing
YMR125W	mRNA-splicing
YNR011C	mRNA-splicing
YOR159C	mRNA-splicing
YOR148C	mRNA-splicing
YMR268C	mRNA-splicing
YHR165C	mRNA-splicing
YKL012W	mRNA-splicing
YKL074C	mRNA-splicing
YLL036C	mRNA-splicing
YLR298C	mRNA-splicing
YLR147C	mRNA-splicing
YKR086W	mRNA-splicing
YKL078W	mRNA-splicing
YJL203W	mRNA-splicing
YIL061C	mRNA-splicing
YNL082W	MSH2-MSH3-complex
YOL090W	MSH2-MSH3-complex
YCR092C	MSH2-MSH3-complex
YDR097C	MSH2-MSH6-complex
YOL090W	MSH2-MSH6-complex
YMR023C	Mto1p-Mss1p-complex
YGL023C	Mto1p-Mss1p-complex
YPL037C	NAC-complex
YHR193C	NAC-complex
YDR397C	NC2-complex
YER159C	NC2-complex
YPL022W	NEF1-complex
YML095C	NEF1-complex
YMR201C	NEF1-complex
YEL037C	NEF2-complex
YER162C	NEF2-complex
YDR460W	NEF3-complex
YGR258C	NEF3-complex
YER171W	NEF3-complex
YPL122C	NEF3-complex
YPR025C	NEF3-complex
YDL108W	NEF3-complex
YDR311W	NEF3-complex
YIL143C	NEF3-complex
YLR005W	NEF3-complex
YJR052W	NEF4-complex
YBR114W	NEF4-complex
YAL009W	Nem1p-Spo7p-complex
YHR004C	Nem1p-Spo7p-complex
YGL090W	Non-homologous-end-joining-apparatus
YDR369C	Non-homologous-end-joining-apparatus
YMR106C	Non-homologous-end-joining-apparatus
YMR224C	Non-homologous-end-joining-apparatus
YMR284W	Non-homologous-end-joining-apparatus
YNL250W	Non-homologous-end-joining-apparatus
YOR005C	Non-homologous-end-joining-apparatus
YMR080C	Nonsense-mediated-mRNA-decay-pathway-complex
YGR072W	Nonsense-mediated-mRNA-decay-pathway-complex
YHR077C	Nonsense-mediated-mRNA-decay-pathway-complex
YDL014W	Nop56p-Nop1p-complex
YOR310C	Nop56p-Nop1p-complex
YLR197W	Nop56p-Nop1p-complex
YIL038C	NOT-complex
YPR072W	NOT-complex
YCR093W	NOT-complex
YDL165W	NOT-complex
YER068W	NOT-complex
YBL050W	NSF-SNAP-complex
YBR080C	NSF-SNAP-complex
YFR002W	NSP1-complex
YGL172W	NSP1-complex
YGR119C	NSP1-complex
YJL041W	NSP1-complex
YJL041W	NSP1-NUP82-complex
YJL061W	NSP1-NUP82-complex
YOR244W	NuA4-complex
YHR099W	NuA4-complex
YER105C	Nuclear-pore-complex
YGL100W	Nuclear-pore-complex
YGR119C	Nuclear-pore-complex
YGL172W	Nuclear-pore-complex
YGL092W	Nuclear-pore-complex
YER107C	Nuclear-pore-complex
YFR002W	Nuclear-pore-complex
YBL079W	Nuclear-pore-complex
YDL116W	Nuclear-pore-complex
YDL148C	Nuclear-pore-complex
YDR192C	Nuclear-pore-complex
YML103C	Nuclear-pore-complex
YMR047C	Nuclear-pore-complex
YMR129W	Nuclear-pore-complex
YOR098C	Nuclear-pore-complex
YIL115C	Nuclear-pore-complex
YJL041W	Nuclear-pore-complex
YJL061W	Nuclear-pore-complex
YLR335W	Nuclear-pore-complex
YLR208W	Nuclear-pore-complex
YKR082W	Nuclear-pore-complex
YKL068W	Nuclear-pore-complex
YKL057C	Nuclear-pore-complex
YJR042W	Nuclear-pore-complex
YJR093C	Nuclear-processing-complexes
YLR115W	Nuclear-processing-complexes
YLR277C	Nuclear-processing-complexes
YMR061W	Nuclear-processing-complexes
YOR250C	Nuclear-processing-complexes
YOL123W	Nuclear-processing-complexes
YAL043C	Nuclear-processing-complexes
YDR301W	Nuclear-processing-complexes
YDR228C	Nuclear-processing-complexes
YGL044C	Nuclear-processing-complexes
YNL030W	Nucleosomal-protein-complex
YNL031C	Nucleosomal-protein-complex
YBL002W	Nucleosomal-protein-complex
YBR010W	Nucleosomal-protein-complex
YDR225W	Nucleosomal-protein-complex
YDR224C	Nucleosomal-protein-complex
YBL003C	Nucleosomal-protein-complex
YBR009C	Nucleosomal-protein-complex
YBR114W	Nucleotide-excision-repairosome
YDR311W	Nucleotide-excision-repairosome
YDL108W	Nucleotide-excision-repairosome
YPL022W	Nucleotide-excision-repairosome
YPL122C	Nucleotide-excision-repairosome
YPR025C	Nucleotide-excision-repairosome
YDR460W	Nucleotide-excision-repairosome
YER171W	Nucleotide-excision-repairosome
YER162C	Nucleotide-excision-repairosome
YGR258C	Nucleotide-excision-repairosome
YEL037C	Nucleotide-excision-repairosome
YML095C	Nucleotide-excision-repairosome
YMR201C	Nucleotide-excision-repairosome
YIL143C	Nucleotide-excision-repairosome
YLR005W	Nucleotide-excision-repairosome
YJR052W	Nucleotide-excision-repairosome
YJR042W	NUP84-complex
YKL057C	NUP84-complex
YLR208W	NUP84-complex
YGL092W	NUP84-complex
YGL100W	NUP84-complex
YDL116W	NUP84-complex
YAL051W	OAF-complex
YOR363C	OAF-complex
YDL232W	Oligosaccharyltransferase
YEL002C	Oligosaccharyltransferase
YGL226C-A	Oligosaccharyltransferase
YGL022W	Oligosaccharyltransferase
YJL002C	Oligosaccharyltransferase
YML019W	Oligosaccharyltransferase
YMR149W	Oligosaccharyltransferase
YOR085W	Oligosaccharyltransferase
YOR103C	Oligosaccharyltransferase
YML032C	other-DNA-repair-complexes
YER095W	other-DNA-repair-complexes
YGL163C	other-DNA-repair-complexes
YDR004W	other-DNA-repair-complexes
YDR076W	other-DNA-repair-complexes
YJR089W	other-kinetochore-proteins
YKL049C	other-kinetochore-proteins
YKL089W	other-kinetochore-proteins
YLR175W	other-kinetochore-proteins
YLR060W	Phenylalaninine-tRNA-ligase
YPR047W	Phenylalaninine-tRNA-ligase
YFL022C	Phenylalaninine-tRNA-ligase
YGR240C	Phosphofructokinase
YMR205C	Phosphofructokinase
YNL289W	Pho85p-complexes
YOL001W	Pho85p-complexes
YGL134W	Pho85p-complexes
YPL031C	Pho85p-complexes
YPL219W	Pho85p-complexes
YDL127W	Pho85p-complexes
YBR060C	Post-replication-complex
YPR162C	Post-replication-complex
YHR118C	Post-replication-complex
YML065W	Post-replication-complex
YNL261W	Post-replication-complex
YLL004W	Post-replication-complex
YJR093C	pre-mRNA-polyadenylation-factor-PFI
YLR277C	pre-mRNA-polyadenylation-factor-PFI
YAL043C	pre-mRNA-polyadenylation-factor-PFI
YDR228C	pre-mRNA3-end-processing-factor-CFI
YGL044C	pre-mRNA3-end-processing-factor-CFI
YMR061W	pre-mRNA3-end-processing-factor-CFI
YOR250C	pre-mRNA3-end-processing-factor-CFI
YOL123W	pre-mRNA3-end-processing-factor-CFI
YLR115W	pre-mRNA3-end-processing-factor-CFII
YLR277C	pre-mRNA3-end-processing-factor-CFII
YDR301W	pre-mRNA3-end-processing-factor-CFII
YBL023C	Pre-replication-complex
YBR202W	Pre-replication-complex
YBR060C	Pre-replication-complex
YPR019W	Pre-replication-complex
YPR162C	Pre-replication-complex
YEL032W	Pre-replication-complex
YGL201C	Pre-replication-complex
YHR118C	Pre-replication-complex
YJL194W	Pre-replication-complex
YLL004W	Pre-replication-complex
YLR103C	Pre-replication-complex
YLR274W	Pre-replication-complex
YML065W	Pre-replication-complex
YNL261W	Pre-replication-complex
YLR163C	Processing-peptidase
YHR024C	Processing-peptidase
YHR013C	Protein-N-acetyltransferase
YDL040C	Protein-N-acetyltransferase
YPR101W	Prp19p-associated-complex
YJL203W	Prp19p-associated-complex
YLL036C	Prp19p-associated-complex
YDL030W	Prp9p-Prp11p-Prp21p-complex
YDL043C	Prp9p-Prp11p-Prp21p-complex
YBR221C	Pyruvate-dehydrogenase
YER178W	Pyruvate-dehydrogenase
YFL018C	Pyruvate-dehydrogenase
YGR193C	Pyruvate-dehydrogenase
YNL071W	Pyruvate-dehydrogenase
YAL038W	Pyruvate-kinase
YOR347C	Pyruvate-kinase
YPR019W	Replication-complex
YPR162C	Replication-complex
YPR175W	Replication-complex
YBL023C	Replication-complex
YBR060C	Replication-complex
YBR278W	Replication-complex
YDL102W	Replication-complex
YBR202W	Replication-complex
YEL032W	Replication-complex
YHR118C	Replication-complex
YGL201C	Replication-complex
YML065W	Replication-complex
YNL261W	Replication-complex
YNL262W	Replication-complex
YJR006W	Replication-complex
YLL004W	Replication-complex
YJR043C	Replication-complex
YLR103C	Replication-complex
YLR274W	Replication-complex
YIL009C-A	Replication-complexes
YIR008C	Replication-complexes
YJL173C	Replication-complexes
YJR068W	Replication-complexes
YKL045W	Replication-complexes
YLR318W	Replication-complexes
YLR274W	Replication-complexes
YLR233C	Replication-complexes
YLR103C	Replication-complexes
YLL004W	Replication-complexes
YKL113C	Replication-complexes
YJR043C	Replication-complexes
YJR006W	Replication-complexes
YJL194W	Replication-complexes
YIL139C	Replication-complexes
YML065W	Replication-complexes
YNL088W	Replication-complexes
YNL102W	Replication-complexes
YOR217W	Replication-complexes
YOL094C	Replication-complexes
YOL006C	Replication-complexes
YNL312W	Replication-complexes
YNL290W	Replication-complexes
YNL262W	Replication-complexes
YNL261W	Replication-complexes
YMR234W	Replication-complexes
YEL032W	Replication-complexes
YGL201C	Replication-complexes
YHR118C	Replication-complexes
YHR164C	Replication-complexes
YER176W	Replication-complexes
YAR007C	Replication-complexes
YBR087W	Replication-complexes
YCR014C	Replication-complexes
YDR052C	Replication-complexes
YDL164C	Replication-complexes
YDL102W	Replication-complexes
YDL017W	Replication-complexes
YBR278W	Replication-complexes
YBR202W	Replication-complexes
YBR088C	Replication-complexes
YBR060C	Replication-complexes
YBL023C	Replication-complexes
YBL035C	Replication-complexes
YOR330C	Replication-complexes
YPR175W	Replication-complexes
YPR162C	Replication-complexes
YPR019W	Replication-complexes
YPL167C	Replication-complexes
YAR007C	Replication-factor-A-complex
YNL312W	Replication-factor-A-complex
YJL173C	Replication-factor-A-complex
YJR068W	Replication-factor-C-complex
YNL290W	Replication-factor-C-complex
YOL094C	Replication-factor-C-complex
YOR217W	Replication-factor-C-complex
YBR087W	Replication-factor-C-complex
YAR007C	Replication-fork-complexes
YBR088C	Replication-fork-complexes
YBR087W	Replication-fork-complexes
YCR014C	Replication-fork-complexes
YDL102W	Replication-fork-complexes
YDL164C	Replication-fork-complexes
YBR278W	Replication-fork-complexes
YBL035C	Replication-fork-complexes
YOR330C	Replication-fork-complexes
YPL167C	Replication-fork-complexes
YPR175W	Replication-fork-complexes
YER176W	Replication-fork-complexes
YMR234W	Replication-fork-complexes
YNL102W	Replication-fork-complexes
YNL262W	Replication-fork-complexes
YNL088W	Replication-fork-complexes
YOR217W	Replication-fork-complexes
YOL094C	Replication-fork-complexes
YOL006C	Replication-fork-complexes
YNL312W	Replication-fork-complexes
YNL290W	Replication-fork-complexes
YHR164C	Replication-fork-complexes
YKL113C	Replication-fork-complexes
YKL045W	Replication-fork-complexes
YJR068W	Replication-fork-complexes
YJR043C	Replication-fork-complexes
YJR006W	Replication-fork-complexes
YJL173C	Replication-fork-complexes
YIR008C	Replication-fork-complexes
YIL139C	Replication-fork-complexes
YLL004W	Replication-initiation-complex
YML065W	Replication-initiation-complex
YNL261W	Replication-initiation-complex
YHR118C	Replication-initiation-complex
YPR162C	Replication-initiation-complex
YBR060C	Replication-initiation-complex
YDR052C	Replication-initiation-complex
YDL017W	Replication-initiation-complex
YJL053W	Retromer-complex
YJL154C	Retromer-complex
YOR069W	Retromer-complex
YOR132W	Retromer-complex
YHR012W	Retromer-complex
YER070W	Ribonucleoside-diphosphate-reductase
YGR180C	Ribonucleoside-diphosphate-reductase
YIL066C	Ribonucleoside-diphosphate-reductase
YJL026W	Ribonucleoside-diphosphate-reductase
YJL148W	RNA-polymerase-I
YJR063W	RNA-polymerase-I
YNL113W	RNA-polymerase-I
YOR224C	RNA-polymerase-I
YNL248C	RNA-polymerase-I
YOR210W	RNA-polymerase-I
YHR143W-A	RNA-polymerase-I
YOR340C	RNA-polymerase-I
YPR110C	RNA-polymerase-I
YPR010C	RNA-polymerase-I
YPR187W	RNA-polymerase-I
YOR341W	RNA-polymerase-I
YBR154C	RNA-polymerase-I
YDR156W	RNA-polymerase-I
YBR154C	RNA-polymerase-II
YDL140C	RNA-polymerase-II
YPR187W	RNA-polymerase-II
YDR404C	RNA-polymerase-II
YHR143W-A	RNA-polymerase-II
YGL070C	RNA-polymerase-II
YOL005C	RNA-polymerase-II
YOR224C	RNA-polymerase-II
YOR151C	RNA-polymerase-II
YOR210W	RNA-polymerase-II
YIL021W	RNA-polymerase-II
YLR418C	RNA-polymerase-II
YJL140W	RNA-polymerase-II
YIL021W	RNA-polymerase-II-holoenzyme
YJL140W	RNA-polymerase-II-holoenzyme
YLR071C	RNA-polymerase-II-holoenzyme
YLR418C	RNA-polymerase-II-holoenzyme
YOR224C	RNA-polymerase-II-holoenzyme
YOR210W	RNA-polymerase-II-holoenzyme
YOR174W	RNA-polymerase-II-holoenzyme
YOR151C	RNA-polymerase-II-holoenzyme
YOL135C	RNA-polymerase-II-holoenzyme
YOL051W	RNA-polymerase-II-holoenzyme
YOL005C	RNA-polymerase-II-holoenzyme
YNR010W	RNA-polymerase-II-holoenzyme
YNL236W	RNA-polymerase-II-holoenzyme
YMR112C	RNA-polymerase-II-holoenzyme
YDR404C	RNA-polymerase-II-holoenzyme
YER022W	RNA-polymerase-II-holoenzyme
YGL070C	RNA-polymerase-II-holoenzyme
YGL151W	RNA-polymerase-II-holoenzyme
YGL025C	RNA-polymerase-II-holoenzyme
YGR104C	RNA-polymerase-II-holoenzyme
YHR041C	RNA-polymerase-II-holoenzyme
YHR143W-A	RNA-polymerase-II-holoenzyme
YHR058C	RNA-polymerase-II-holoenzyme
YER179W	RNA-polymerase-II-holoenzyme
YPL086C	RNA-polymerase-II-holoenzyme
YPR187W	RNA-polymerase-II-holoenzyme
YPR168W	RNA-polymerase-II-holoenzyme
YPL129W	RNA-polymerase-II-holoenzyme
YBL093C	RNA-polymerase-II-holoenzyme
YDL005C	RNA-polymerase-II-holoenzyme
YBR253W	RNA-polymerase-II-holoenzyme
YBR154C	RNA-polymerase-II-holoenzyme
YDR308C	RNA-polymerase-II-holoenzyme
YDL140C	RNA-polymerase-II-holoenzyme
YBR193C	RNA-polymerase-II-holoenzyme
YBR154C	RNA-polymerase-III
YPR110C	RNA-polymerase-III
YPR187W	RNA-polymerase-III
YPR190C	RNA-polymerase-III
YHR143W-A	RNA-polymerase-III
YNL113W	RNA-polymerase-III
YNR003C	RNA-polymerase-III
YOR210W	RNA-polymerase-III
YOR224C	RNA-polymerase-III
YOR207C	RNA-polymerase-III
YOR116C	RNA-polymerase-III
YNL151C	RNA-polymerase-III
YKL144C	RNA-polymerase-III
YNL221C	RNase-MRP
YNL282W	RNase-MRP
YGR030C	RNase-MRP
YHR062C	RNase-MRP
YAL033W	RNase-MRP
YBR257W	RNase-MRP
YBR167C	RNase-MRP
YBL018C	RNase-MRP
YAL033W	RNase-P
YBR257W	RNase-P
YBR167C	RNase-P
YBL018C	RNase-P
YGR030C	RNase-P
YHR062C	RNase-P
YNL221C	RNase-P
YNL282W	RNase-P
YIR015W	RNase-P
YIL126W	RSC-complex
YLR357W	RSC-complex
YLR321C	RSC-complex
YKR008W	RSC-complex
YMR033W	RSC-complex
YOR213C	RSC-complex
YFR037C	RSC-complex
YGR056W	RSC-complex
YCR052W	RSC-complex
YPR034W	RSC-complex
YBL103C	RTG-complex
YOL067C	RTG-complex
YMR236W	SAGA-complex
YOL148C	SAGA-complex
YLR055C	SAGA-complex
YBR081C	SAGA-complex
YDR176W	SAGA-complex
YDR167W	SAGA-complex
YDR145W	SAGA-complex
YBR198C	SAGA-complex
YPL254W	SAGA-complex
YDR392W	SAGA-complex
YHR099W	SAGA-complex
YDR448W	SAGA-complex
YGR252W	SAGA-complex
YGL112C	SAGA-complex
YDR392W	SAGA-like-complex
YGL112C	SAGA-like-complex
YHR099W	SAGA-like-complex
YDR448W	SAGA-like-complex
YBR081C	SAGA-like-complex
YER001W	SBF-complex
YLR182W	SBF-complex
YFL009W	SCF-CDC4-complex
YDL132W	SCF-CDC4-complex
YDR054C	SCF-CDC4-complex
YDR328C	SCF-CDC4-complex
YDL132W	SCF-complexes
YDR054C	SCF-complexes
YDR328C	SCF-complexes
YFL009W	SCF-complexes
YJR090C	SCF-complexes
YJR090C	SCF-GRR1-complex
YDL132W	SCF-GRR1-complex
YDR054C	SCF-GRR1-complex
YDR328C	SCF-GRR1-complex
YDL132W	SCF-MET30-complex
YDR054C	SCF-MET30-complex
YDR328C	SCF-MET30-complex
YIL046W	SCF-MET30-complex
YLR378C	Sec61-complex
YDR086C	Sec61-complex
YER087C-B	Sec61-complex
YBR171W	Sec62-63-complex
YPL094C	Sec62-63-complex
YLR292C	Sec62-63-complex
YOR254C	Sec62-63-complex
YER054C	Serine-threonine-phoshpoprotein-phosphatase
YER133W	Serine-threonine-phoshpoprotein-phosphatase
YDR028C	Serine-threonine-phoshpoprotein-phosphatase
YKL193C	Serine-threonine-phoshpoprotein-phosphatase
YMR311C	Serine-threonine-phoshpoprotein-phosphatase
YOR178C	Serine-threonine-phoshpoprotein-phosphatase
YML055W	Signal-peptidase
YIR022W	Signal-peptidase
YJR010C-A	Signal-peptidase
YKL122C	Signal-recognition-particle
YML105C	Signal-recognition-particle
YDL092W	Signal-recognition-particle
YPL210C	Signal-recognition-particle
YPR088C	Signal-recognition-particle
YPL243W	Signal-recognition-particle
YDR292C	Signal-recognition-particle-receptor
YKL154W	Signal-recognition-particle-receptor
YMR053C	Sin3-complex
YOL004W	Sin3-complex
YNL330C	Sin3-complex
YNL309W	Sin3-complex
YGR098C	Sister-chromatid-cohesion-regulation-complex
YDR113C	Sister-chromatid-cohesion-regulation-complex
YAL030W	SNAREs
YOR327C	SNAREs
YPL232W	SNAREs
YDR468C	SNAREs
YHL031C	SNAREs
YGL212W	SNAREs
YDR498C	SNAREs
YMR183C	SNAREs
YOR106W	SNAREs
YOR075W	SNAREs
YOR036W	SNAREs
YOL018C	SNAREs
YMR197C	SNAREs
YIL004C	SNAREs
YLR026C	SNAREs
YLR078C	SNAREs
YLR268W	SNAREs
YLR093C	SNAREs
YKL196C	SNAREs
YJL089W	SNF1-complex
YDR422C	SNF1-complex
YDR477W	SNF1-complex
YER027C	SNF1-complex
YGL208W	SNF1-complex
YGL115W	SNF1-complex
YHR129C	SPB-associated-proteins
YPR141C	SPB-associated-proteins
YBL034C	SPB-associated-proteins
YDR201W	SPB-associated-proteins
YCL029C	SPB-associated-proteins
YBR211C	SPB-associated-proteins
YIL144W	SPB-associated-proteins
YLR045C	SPB-associated-proteins
YKR054C	SPB-associated-proteins
YKR037C	SPB-associated-proteins
YMR065W	SPB-associated-proteins
YMR294W	SPB-associated-proteins
YOL069W	SPB-associated-proteins
YMR198W	SPB-associated-proteins
YMR117C	SPB-components
YNL126W	SPB-components
YNL188W	SPB-components
YNL225C	SPB-components
YOR257W	SPB-components
YHR172W	SPB-components
YLR212C	SPB-components
YKL042W	SPB-components
YAL047C	SPB-components
YBR109C	SPB-components
YDR356W	SPB-components
YOR373W	SPB-components
YPL124W	SPB-components
YPL255W	SPB-components
YER018C	SPB-components
YGL093W	SPB-components
YER018C	Spindle-pole-body
YGL093W	Spindle-pole-body
YGR113W	Spindle-pole-body
YHR129C	Spindle-pole-body
YGL061C	Spindle-pole-body
YOR257W	Spindle-pole-body
YPR141C	Spindle-pole-body
YPL255W	Spindle-pole-body
YPL124W	Spindle-pole-body
YOR373W	Spindle-pole-body
YAL047C	Spindle-pole-body
YDR356W	Spindle-pole-body
YDR201W	Spindle-pole-body
YBL034C	Spindle-pole-body
YBR211C	Spindle-pole-body
YCL029C	Spindle-pole-body
YBR109C	Spindle-pole-body
YHR172W	Spindle-pole-body
YKL042W	Spindle-pole-body
YIL144W	Spindle-pole-body
YKR054C	Spindle-pole-body
YLR212C	Spindle-pole-body
YLR045C	Spindle-pole-body
YKR037C	Spindle-pole-body
YMR065W	Spindle-pole-body
YMR117C	Spindle-pole-body
YMR294W	Spindle-pole-body
YNL126W	Spindle-pole-body
YOL069W	Spindle-pole-body
YNL225C	Spindle-pole-body
YNL188W	Spindle-pole-body
YMR198W	Spindle-pole-body
YNL025C	Srb10p-complex
YCR081W	Srb10p-complex
YPL042C	Srb10p-complex
YDR443C	Srb10p-complex
YGR040W	STE5-MAPK-complex
YBL016W	STE5-MAPK-complex
YDR103W	STE5-MAPK-complex
YDL159W	STE5-MAPK-complex
YLR362W	STE5-MAPK-complex
YKL141W	Succinate-dehydrogenase-complex
YKL148C	Succinate-dehydrogenase-complex
YLL041C	Succinate-dehydrogenase-complex
YDR178W	Succinate-dehydrogenase-complex
YGR244C	Succinyl-CoA-ligase
YOR142W	Succinyl-CoA-ligase
YMR033W	SWI-SNF-transcription-activator-complex
YNR023W	SWI-SNF-transcription-activator-complex
YJL176C	SWI-SNF-transcription-activator-complex
YHL025W	SWI-SNF-transcription-activator-complex
YBR289W	SWI-SNF-transcription-activator-complex
YDR073W	SWI-SNF-transcription-activator-complex
YOR290C	SWI-SNF-transcription-activator-complex
YPL016W	SWI-SNF-transcription-activator-complex
YPL129W	SWI-SNF-transcription-activator-complex
YPR034W	SWI-SNF-transcription-activator-complex
YDR285W	Synaptonemal-complex
YIL072W	Synaptonemal-complex
YLR263W	Synaptonemal-complex
YML015C	TAFIIs
YML098W	TAFIIs
YMR236W	TAFIIs
YMR227C	TAFIIs
YBR198C	TAFIIs
YDR145W	TAFIIs
YDR167W	TAFIIs
YCR042C	TAFIIs
YPL011C	TAFIIs
YPL129W	TAFIIs
YGL112C	TAFIIs
YGR274C	TAFIIs
YIL009C-A	Telomerase
YLR233C	Telomerase
YLR318W	Telomerase
YKL058W	TFIIA
YOR194C	TFIIA
YML015C	TFIID
YML098W	TFIID
YMR236W	TFIID
YMR227C	TFIID
YER148W	TFIID
YGL112C	TFIID
YGR274C	TFIID
YPL011C	TFIID
YPL129W	TFIID
YBR198C	TFIID
YDR145W	TFIID
YDR167W	TFIID
YCR042C	TFIID
YKL028W	TFIIE
YKR062W	TFIIE
YPL129W	TFIIF
YGR005C	TFIIF
YGR186W	TFIIF
YDR460W	TFIIH
YER171W	TFIIH
YPL122C	TFIIH
YPR056W	TFIIH
YPR025C	TFIIH
YDL108W	TFIIH
YDR311W	TFIIH
YIL143C	TFIIH
YLR005W	TFIIH
YNL039W	TFIIIB
YER148W	TFIIIB
YGR246C	TFIIIB
YGR047C	TFIIIC
YAL001C	TFIIIC
YDR362C	TFIIIC
YBR123C	TFIIIC
YOR110W	TFIIIC
YML112W	TFIIK
YJL006C	TFIIK
YKL139W	TFIIK
YIL022W	TIM-transport-across-the-inner-membrane
YJL054W	TIM-transport-across-the-inner-membrane
YJR045C	TIM-transport-across-the-inner-membrane
YJL143W	TIM-transport-across-the-inner-membrane
YNR017W	TIM-transport-across-the-inner-membrane
YBR091C	TIM-transport-across-the-inner-membrane
YDL217C	TIM-transport-across-the-inner-membrane
YEL020W-A	TIM-transport-across-the-inner-membrane
YHR005C-A	TIM-transport-across-the-inner-membrane
YNR017W	Tim17p-complex
YJL143W	Tim17p-complex
YJL054W	Tim22p-complex
YEL020W-A	Tim22p-complex
YHR005C-A	Tim22p-complex
YBR091C	Tim22p-complex
YDL217C	Tim22p-complex
YEL020W-A	Tim9p-Tim10p-complex
YHR005C-A	Tim9p-Tim10p-complex
YGR082W	TOM-transport-across-the-outer-membrane
YHR117W	TOM-transport-across-the-outer-membrane
YPR133W-A	TOM-transport-across-the-outer-membrane
YMR060C	TOM-transport-across-the-outer-membrane
YNL070W	TOM-transport-across-the-outer-membrane
YOR045W	TOM-transport-across-the-outer-membrane
YNL131W	TOM-transport-across-the-outer-membrane
YNL121C	TOM-transport-across-the-outer-membrane
YMR203W	TOM-transport-across-the-outer-membrane
YNL088W	Topoisomerases
YOL006C	Topoisomerases
YDR407C	TRAPP-complex
YDR472W	TRAPP-complex
YGR166W	TRAPP-complex
YBR254C	TRAPP-complex
YDR108W	TRAPP-complex
YDR246W	TRAPP-complex
YKR068C	TRAPP-complex
YML077W	TRAPP-complex
YMR218C	TRAPP-complex
YOR115C	TRAPP-complex
YOR212W	Trimeric-G-proteins
YJR086W	Trimeric-G-proteins
YHR005C	Trimeric-G-proteins
YDR463W	tRNA-splicing
YHR006W	tRNA-splicing
YAR008W	tRNA-splicing
YDL048C	tRNA-splicing
YPL083C	tRNA-splicing
YJL087C	tRNA-splicing
YKL205W	tRNA-splicing
YLR105C	tRNA-splicing
YLR375W	tRNA-splicing
YMR059W	tRNA-splicing
YOL102C	tRNA-splicing
YMR183C	t-SNAREs
YOL018C	t-SNAREs
YOR036W	t-SNAREs
YOR106W	t-SNAREs
YOR075W	t-SNAREs
YLR026C	t-SNAREs
YPL232W	t-SNAREs
YDR468C	t-SNAREs
YDR498C	t-SNAREs
YGL212W	t-SNAREs
YDR424C	Tubulin-associated-motorproteins
YDR488C	Tubulin-associated-motorproteins
YEL061C	Tubulin-associated-motorproteins
YHR129C	Tubulin-associated-motorproteins
YHR156C	Tubulin-associated-motorproteins
YGL216W	Tubulin-associated-motorproteins
YGL005C	Tubulin-associated-motorproteins
YPL155C	Tubulin-associated-motorproteins
YPR141C	Tubulin-associated-motorproteins
YPL174C	Tubulin-associated-motorproteins
YBL063W	Tubulin-associated-motorproteins
YKR054C	Tubulin-associated-motorproteins
YMR198W	Tubulin-associated-motorproteins
YMR294W	Tubulin-associated-motorproteins
YMR138W	Tubulin-associated-proteins
YOR058C	Tubulin-associated-proteins
YNL223W	Tubulin-associated-proteins
YNL126W	Tubulin-associated-proteins
YJL042W	Tubulin-associated-proteins
YLR045C	Tubulin-associated-proteins
YLR175W	Tubulin-associated-proteins
YBL034C	Tubulin-associated-proteins
YCL029C	Tubulin-associated-proteins
YBL078C	Tubulin-associated-proteins
YOR265W	Tubulin-associated-proteins
YOR272W	Tubulin-associated-proteins
YPL241C	Tubulin-associated-proteins
YER016W	Tubulin-associated-proteins
YFL037W	Tubulins
YLR212C	Tubulins
YML085C	Tubulins
YML124C	Tubulins
YBR112C	Tup1-Ssn6-complex
YCR084C	Tup1-Ssn6-complex
YDR207C	Ume6-Ime1-complex
YJR094C	Ume6-Ime1-complex
YLR141W	Upstream-Activation-Factor-complex
YMR270C	Upstream-Activation-Factor-complex
YBL025W	Upstream-Activation-Factor-complex
YDL077C	Vacuolar-assembly-complex
YDR080W	Vacuolar-assembly-complex
YGL212W	Vam3-Vam7-vacuolar-t-SNARE-complex
YOR106W	Vam3-Vam7-vacuolar-t-SNARE-complex
YJL053W	Vps35-Vps29-Vps26-complex
YJL154C	Vps35-Vps29-Vps26-complex
YHR012W	Vps35-Vps29-Vps26-complex
YPR173C	Vps4p-ATPase-complex
YKL041W	Vps4p-ATPase-complex
YLR025W	Vps4p-ATPase-complex
YOR069W	Vps5-Vps17-complex
YOR132W	Vps5-Vps17-complex
YMR197C	v-SNAREs
YIL004C	v-SNAREs
YLR268W	v-SNAREs
YLR093C	v-SNAREs
YLR078C	v-SNAREs
YOR327C	v-SNAREs
YAL030W	v-SNAREs
YHL031C	v-SNAREs
YGR059W	10-nm-filaments
YHR107C	10-nm-filaments
YCR002C	10-nm-filaments
YDL225W	10-nm-filaments
YDR218C	10-nm-filaments
YJR076C	10-nm-filaments
YLR314C	10-nm-filaments
YML104C	10-nm-filaments
YLR342W	13-beta-D-glucan-synthase
YCR034W	13-beta-D-glucan-synthase
YGR032W	13-beta-D-glucan-synthase
YGR143W	16-beta-D-glucan-synthase
YPR159W	16-beta-D-glucan-synthase
YDL007W	19-22S-regulator
YDL147W	19-22S-regulator
YDL097C	19-22S-regulator
YDR394W	19-22S-regulator
YDR427W	19-22S-regulator
YHR027C	19-22S-regulator
YGR232W	19-22S-regulator
YER021W	19-22S-regulator
YFR052W	19-22S-regulator
YGL048C	19-22S-regulator
YFR004W	19-22S-regulator
YHR200W	19-22S-regulator
YKL145W	19-22S-regulator
YIL075C	19-22S-regulator
YOR117W	19-22S-regulator
YOR261C	19-22S-regulator
YPR108W	19-22S-regulator
YOR259C	19-22S-regulator
YIL125W	2-oxoglutarate-dehydrogenase
YFL018C	2-oxoglutarate-dehydrogenase
YDR148C	2-oxoglutarate-dehydrogenase
YBL041W	20S-proteasome
YBR173C	20S-proteasome
YER012W	20S-proteasome
YGR253C	20S-proteasome
YGR135W	20S-proteasome
YGL011C	20S-proteasome
YFR050C	20S-proteasome
YER094C	20S-proteasome
YJL001W	20S-proteasome
YML092C	20S-proteasome
YMR314W	20S-proteasome
YOL038W	20S-proteasome
YOR157C	20S-proteasome
YOR362C	20S-proteasome
YPR103W	20S-proteasome

## Sheet: SGD_complexes
Protein	GO Term ID
YGR254W	GO:0000015
YHR174W	GO:0000015
YML095C	GO:0000110
YMR201C	GO:0000110
YPL022W	GO:0000110
YEL037C	GO:0000111
YER162C	GO:0000111
YDR311W	GO:0000112
YER171W	GO:0000112
YGR258C	GO:0000112
YIL143C	GO:0000112
YLR005W	GO:0000112
YPL122C	GO:0000112
YPR056W	GO:0000112
YBR114W	GO:0000113
YJR052W	GO:0000113
YKL112W	GO:0000113
YDR155C	GO:0000118
YMR075W	GO:0000118
YMR263W	GO:0000118
YNL097C	GO:0000118
YNL330C	GO:0000118
YOR279C	GO:0000118
YPR068C	GO:0000118
YDR359C	GO:0000123
YEL056W	GO:0000123
YFL039C	GO:0000123
YGR002C	GO:0000123
YHR099W	GO:0000123
YLL022C	GO:0000123
YNL136W	GO:0000123
YPL001W	GO:0000123
YPR023C	GO:0000123
YBR081C	GO:0000124
YBR111W-A	GO:0000124
YBR198C	GO:0000124
YCL010C	GO:0000124
YDR145W	GO:0000124
YDR167W	GO:0000124
YDR176W	GO:0000124
YDR392W	GO:0000124
YDR448W	GO:0000124
YER164W	GO:0000124
YGL066W	GO:0000124
YGL112C	GO:0000124
YGR252W	GO:0000124
YHR099W	GO:0000124
YLR055C	GO:0000124
YMR223W	GO:0000124
YMR236W	GO:0000124
YOL148C	GO:0000124
YPL047W	GO:0000124
YPL254W	GO:0000124
YER148W	GO:0000126
YGR246C	GO:0000126
YNL039W	GO:0000126
YAL001C	GO:0000127
YBR123C	GO:0000127
YDR362C	GO:0000127
YGR047C	GO:0000127
YOR110W	GO:0000127
YPL007C	GO:0000127
YER149C	GO:0000133
YLL021W	GO:0000133
YLR313C	GO:0000133
YLR319C	GO:0000133
YNL271C	GO:0000133
YNL293W	GO:0000133
YOL112W	GO:0000133
YDR245W	GO:0000136
YEL036C	GO:0000136
YJL183W	GO:0000136
YJR075W	GO:0000136
YML115C	GO:0000136
YPL050C	GO:0000136
YBR102C	GO:0000145
YDR166C	GO:0000145
YER008C	GO:0000145
YGL233W	GO:0000145
YIL068C	GO:0000145
YJL085W	GO:0000145
YLR166C	GO:0000145
YPR055W	GO:0000145
YGR032W	GO:0000148
YLR342W	GO:0000148
YPR165W	GO:0000148
YDL013W	GO:0000151
YER116C	GO:0000151
YER125W	GO:0000151
YML111W	GO:0000151
YMR275C	GO:0000151
YOR057W	GO:0000151
YAL016W	GO:0000159
YDL134C	GO:0000159
YPL152W	GO:0000159
YBR045C	GO:0000164
YBR050C	GO:0000164
YDR028C	GO:0000164
YER054C	GO:0000164
YER133W	GO:0000164
YLR273C	GO:0000164
YOR178C	GO:0000164
YCR035C	GO:0000176
YDL111C	GO:0000176
YDR280W	GO:0000176
YGR095C	GO:0000176
YGR158C	GO:0000176
YGR195W	GO:0000176
YHR069C	GO:0000176
YHR081W	GO:0000176
YNL232W	GO:0000176
YNR024W	GO:0000176
YOL021C	GO:0000176
YOL142W	GO:0000176
YOR001W	GO:0000176
YCR035C	GO:0000177
YDL111C	GO:0000177
YDR280W	GO:0000177
YGR095C	GO:0000177
YGR158C	GO:0000177
YGR195W	GO:0000177
YHR069C	GO:0000177
YNL232W	GO:0000177
YOL021C	GO:0000177
YOL142W	GO:0000177
YAR008W	GO:0000214
YLR105C	GO:0000214
YMR059W	GO:0000214
YPL083C	GO:0000214
YCL005W-A	GO:0000220
YEL027W	GO:0000220
YHR026W	GO:0000220
YLR447C	GO:0000220
YMR054W	GO:0000220
YOR270C	GO:0000220
YPL234C	GO:0000220
YBR127C	GO:0000221
YDL185W	GO:0000221
YEL051W	GO:0000221
YGR020C	GO:0000221
YHR039C-A	GO:0000221
YKL080W	GO:0000221
YOR332W	GO:0000221
YPR036W	GO:0000221
YDR130C	GO:0000235
YEL061C	GO:0000235
YKR054C	GO:0000235
YDR298C	GO:0000274
YKL016C	GO:0000274
YPL078C	GO:0000274
Q0080	GO:0000276
Q0085	GO:0000276
Q0130	GO:0000276
YDR322C-A	GO:0000276
YDR377W	GO:0000276
YLR295C	GO:0000276
YML081C-A	GO:0000276
YOL077W-A	GO:0000276
YPL078C	GO:0000276
YPR020W	GO:0000276
YBR135W	GO:0000307
YBR160W	GO:0000307
YDL127W	GO:0000307
YDL179W	GO:0000307
YER059W	GO:0000307
YGL134W	GO:0000307
YGL215W	GO:0000307
YGR108W	GO:0000307
YHR071W	GO:0000307
YIL050W	GO:0000307
YLR226W	GO:0000307
YNL289W	GO:0000307
YOL001W	GO:0000307
YPL031C	GO:0000307
YPL219W	GO:0000307
YPL256C	GO:0000307
YPR161C	GO:0000307
YDL084W	GO:0000346
YDR381W	GO:0000346
YNL253W	GO:0000346
YGR262C	GO:0000408
YJL184W	GO:0000408
YKR038C	GO:0000408
YKR095W-A	GO:0000408
YML036W	GO:0000408
YBL008W	GO:0000417
YBR215W	GO:0000417
YJR140C	GO:0000417
YOR038C	GO:0000417
YDR079C-A	GO:0000439
YDR311W	GO:0000439
YER171W	GO:0000439
YIL143C	GO:0000439
YLR005W	GO:0000439
YPL122C	GO:0000439
YPR056W	GO:0000439
YDR138W	GO:0000445
YHR167W	GO:0000445
YML062C	GO:0000445
YNL139C	GO:0000445
YDR138W	GO:0000446
YHR167W	GO:0000446
YML062C	GO:0000446
YNL139C	GO:0000446
YBL025W	GO:0000500
YLR141W	GO:0000500
YMR270C	GO:0000500
YOR295W	GO:0000500
YBR082C	GO:0000502
YDL147W	GO:0000502
YDR059C	GO:0000502
YDR069C	GO:0000502
YDR177W	GO:0000502
YEL037C	GO:0000502
YFR010W	GO:0000502
YGL141W	GO:0000502
YHL030W	GO:0000502
YHR052W	GO:0000502
YHR200W	GO:0000502
YDR437W	GO:0000506
YGR216C	GO:0000506
YNL038W	GO:0000506
YPL076W	GO:0000506
YPL096C-A	GO:0000506
YPL175W	GO:0000506
YBR211C	GO:0000776
YBR233W-A	GO:0000776
YCL029C	GO:0000776
YDR320C-A	GO:0000776
YDR328C	GO:0000776
YDR383C	GO:0000776
YER016W	GO:0000776
YFR046C	GO:0000776
YGL086W	GO:0000776
YGR188C	GO:0000776
YGR218W	GO:0000776
YIR010W	GO:0000776
YJR060W	GO:0000776
YJR112W	GO:0000776
YKL049C	GO:0000776
YKL138C-A	GO:0000776
YLR045C	GO:0000776
YLR315W	GO:0000776
YOR195W	GO:0000776
YPL233W	GO:0000776
YCL029C	GO:0000778
YDL028C	GO:0000778
YDR016C	GO:0000778
YDR130C	GO:0000778
YDR201W	GO:0000778
YDR318W	GO:0000778
YDR532C	GO:0000778
YEL061C	GO:0000778
YER018C	GO:0000778
YER106W	GO:0000778
YER133W	GO:0000778
YGL060W	GO:0000778
YGL061C	GO:0000778
YGL093W	GO:0000778
YGR113W	GO:0000778
YGR140W	GO:0000778
YGR179C	GO:0000778
YGR188C	GO:0000778
YIL144W	GO:0000778
YJR089W	GO:0000778
YJR135C	GO:0000778
YKL052C	GO:0000778
YKR037C	GO:0000778
YKR083C	GO:0000778
YLR045C	GO:0000778
YLR381W	GO:0000778
YMR094W	GO:0000778
YMR117C	GO:0000778
YMR168C	GO:0000778
YOL069W	GO:0000778
YOR026W	GO:0000778
YOR073W	GO:0000778
YOR195W	GO:0000778
YPL018W	GO:0000778
YPL209C	GO:0000778
YPL268W	GO:0000778
YPR046W	GO:0000778
YBL097W	GO:0000799
YDR325W	GO:0000799
YFR031C	GO:0000799
YLR086W	GO:0000799
YLR272C	GO:0000799
YDR013W	GO:0000811
YDR489W	GO:0000811
YJL072C	GO:0000811
YOL146W	GO:0000811
YAL011W	GO:0000812
YBR231C	GO:0000812
YDR190C	GO:0000812
YDR334W	GO:0000812
YDR485C	GO:0000812
YFL039C	GO:0000812
YGR002C	GO:0000812
YJL081C	GO:0000812
YLR085C	GO:0000812
YLR385C	GO:0000812
YLR399C	GO:0000812
YML041C	GO:0000812
YNL107W	GO:0000812
YPL235W	GO:0000812
YCL008C	GO:0000813
YGR206W	GO:0000813
YLR119W	GO:0000813
YPL065W	GO:0000813
YJR102C	GO:0000814
YLR417W	GO:0000814
YPL002C	GO:0000814
YKL002W	GO:0000815
YKL041W	GO:0000815
YLR025W	GO:0000815
YMR077C	GO:0000815
YBR211C	GO:0000817
YDR318W	GO:0000817
YGR179C	GO:0000817
YPL018W	GO:0000817
YAL034W-A	GO:0000818
YIR010W	GO:0000818
YJR112W	GO:0000818
YPL233W	GO:0000818
YBR170C	GO:0000837
YDL126C	GO:0000837
YIL030C	GO:0000837
YML013W	GO:0000837
YMR264W	GO:0000837
YLR207W	GO:0000838
YOL013C	GO:0000838
YBR201W	GO:0000839
YLR207W	GO:0000839
YML029W	GO:0000839
YOL013C	GO:0000839
YHR172W	GO:0000928
YLR212C	GO:0000928
YNL126W	GO:0000928
YDR027C	GO:0000938
YDR484W	GO:0000938
YJL029C	GO:0000938
YKR020W	GO:0000938
YKL089W	GO:0000941
YBR107C	GO:0000942
YDR254W	GO:0000942
YBR188C	GO:0000974
YDL209C	GO:0000974
YDR416W	GO:0000974
YGR129W	GO:0000974
YJR050W	GO:0000974
YLL036C	GO:0000974
YLR117C	GO:0000974
YMR213W	GO:0000974
YPL151C	GO:0000974
YPR101W	GO:0000974
YAL010C	GO:0001401
YHR083W	GO:0001401
YMR060C	GO:0001401
YNL026W	GO:0001401
YIL022W	GO:0001405
YJL104W	GO:0001405
YJR045C	GO:0001405
YKR065C	GO:0001405
YLR008C	GO:0001405
YNL328C	GO:0001405
YOR232W	GO:0001405
YAR002W	GO:0005643
YBL079W	GO:0005643
YBR111W-A	GO:0005643
YDL088C	GO:0005643
YDL116W	GO:0005643
YDL207W	GO:0005643
YDR159W	GO:0005643
YDR192C	GO:0005643
YER105C	GO:0005643
YER107C	GO:0005643
YER110C	GO:0005643
YFR002W	GO:0005643
YGL016W	GO:0005643
YGL086W	GO:0005643
YGL092W	GO:0005643
YGL100W	GO:0005643
YGL172W	GO:0005643
YGR119C	GO:0005643
YHR015W	GO:0005643
YIL063C	GO:0005643
YIL115C	GO:0005643
YJL030W	GO:0005643
YJL039C	GO:0005643
YJL041W	GO:0005643
YJL061W	GO:0005643
YJR042W	GO:0005643
YKL057C	GO:0005643
YKL068W	GO:0005643
YKL186C	GO:0005643
YKR082W	GO:0005643
YLL023C	GO:0005643
YLR018C	GO:0005643
YLR064W	GO:0005643
YLR208W	GO:0005643
YLR335W	GO:0005643
YLR347C	GO:0005643
YML031W	GO:0005643
YML103C	GO:0005643
YML107C	GO:0005643
YMR047C	GO:0005643
YMR129W	GO:0005643
YMR153W	GO:0005643
YMR255W	GO:0005643
YMR273C	GO:0005643
YOL072W	GO:0005643
YOR046C	GO:0005643
YOR098C	GO:0005643
YOR257W	GO:0005643
YPL020C	GO:0005643
YPL125W	GO:0005643
YPL169C	GO:0005643
YBL035C	GO:0005658
YIR008C	GO:0005658
YKL045W	GO:0005658
YNL102W	GO:0005658
YAR007C	GO:0005662
YJL173C	GO:0005662
YNL312W	GO:0005662
YBR087W	GO:0005663
YJR068W	GO:0005663
YNL290W	GO:0005663
YOL094C	GO:0005663
YOR217W	GO:0005663
YBR060C	GO:0005664
YHR118C	GO:0005664
YLL004W	GO:0005664
YML065W	GO:0005664
YNL261W	GO:0005664
YPR162C	GO:0005664
YBR154C	GO:0005665
YDL140C	GO:0005665
YDR404C	GO:0005665
YGL070C	GO:0005665
YHR143W-A	GO:0005665
YIL021W	GO:0005665
YJL140W	GO:0005665
YOL005C	GO:0005665
YOR151C	GO:0005665
YOR210W	GO:0005665
YOR224C	GO:0005665
YPR187W	GO:0005665
YBR154C	GO:0005666
YDL150W	GO:0005666
YDR045C	GO:0005666
YHR143W-A	GO:0005666
YJL011C	GO:0005666
YKL144C	GO:0005666
YKR025W	GO:0005666
YNL113W	GO:0005666
YNL151C	GO:0005666
YNR003C	GO:0005666
YOR116C	GO:0005666
YOR207C	GO:0005666
YOR210W	GO:0005666
YOR224C	GO:0005666
YPR110C	GO:0005666
YPR187W	GO:0005666
YPR190C	GO:0005666
YCR065W	GO:0005667
YIL131C	GO:0005667
YNL068C	GO:0005667
YPR104C	GO:0005667
YBR198C	GO:0005669
YCR042C	GO:0005669
YDR145W	GO:0005669
YDR167W	GO:0005669
YER148W	GO:0005669
YGL112C	GO:0005669
YGR274C	GO:0005669
YML015C	GO:0005669
YML098W	GO:0005669
YML114C	GO:0005669
YMR005W	GO:0005669
YMR227C	GO:0005669
YMR236W	GO:0005669
YPL011C	GO:0005669
YPL129W	GO:0005669
YCL010C	GO:0005671
YCR082W	GO:0005671
YDR176W	GO:0005671
YDR448W	GO:0005671
YGR252W	GO:0005671
YOR023C	GO:0005671
YPL254W	GO:0005671
YKL058W	GO:0005672
YOR194C	GO:0005672
YKL028W	GO:0005673
YKR062W	GO:0005673
YGR005C	GO:0005674
YGR186W	GO:0005674
YPL129W	GO:0005674
YDL108W	GO:0005675
YDR079C-A	GO:0005675
YDR311W	GO:0005675
YDR460W	GO:0005675
YER171W	GO:0005675
YIL143C	GO:0005675
YLR005W	GO:0005675
YPL122C	GO:0005675
YPR025C	GO:0005675
YPR056W	GO:0005675
YDL042C	GO:0005677
YDR227W	GO:0005677
YKR101W	GO:0005677
YLR442C	GO:0005677
YER030W	GO:0005678
YJL115W	GO:0005678
YOL012C	GO:0005678
YBL084C	GO:0005680
YDL008W	GO:0005680
YDR118W	GO:0005680
YDR260C	GO:0005680
YFR036W	GO:0005680
YGL003C	GO:0005680
YGL116W	GO:0005680
YGL240W	GO:0005680
YGR225W	GO:0005680
YHR166C	GO:0005680
YIR025W	GO:0005680
YKL022C	GO:0005680
YLR102C	GO:0005680
YLR127C	GO:0005680
YNL172W	GO:0005680
YOR249C	GO:0005680
YBR154C	GO:0005736
YDR156W	GO:0005736
YHR143W-A	GO:0005736
YJL148W	GO:0005736
YJR063W	GO:0005736
YNL113W	GO:0005736
YNL248C	GO:0005736
YOR210W	GO:0005736
YOR224C	GO:0005736
YOR340C	GO:0005736
YOR341W	GO:0005736
YPR010C	GO:0005736
YPR110C	GO:0005736
YPR187W	GO:0005736
YGR082W	GO:0005742
YKL195W	GO:0005742
YMR203W	GO:0005742
YNL070W	GO:0005742
YNL121C	GO:0005742
YNL131W	GO:0005742
YOR045W	GO:0005742
YPR133W-A	GO:0005742
YGR033C	GO:0005744
YJL104W	GO:0005744
YJL143W	GO:0005744
YLR008C	GO:0005744
YNR017W	GO:0005744
YPL063W	GO:0005744
YER017C	GO:0005745
YMR089C	GO:0005745
YDR178W	GO:0005749
YKL141W	GO:0005749
YKL148C	GO:0005749
YLL041C	GO:0005749
YOL071W	GO:0005749
Q0105	GO:0005750
YBL045C	GO:0005750
YDR529C	GO:0005750
YEL024W	GO:0005750
YFR033C	GO:0005750
YGR183C	GO:0005750
YHR001W-A	GO:0005750
YJL166W	GO:0005750
YOR065W	GO:0005750
YPR191W	GO:0005750
Q0045	GO:0005751
Q0250	GO:0005751
Q0275	GO:0005751
YDL067C	GO:0005751
YGL187C	GO:0005751
YGL191W	GO:0005751
YHR051W	GO:0005751
YIL111W	GO:0005751
YLR038C	GO:0005751
YLR395C	GO:0005751
YML030W	GO:0005751
YMR256C	GO:0005751
YNL052W	GO:0005751
YNR018W	GO:0005751
YDL130W-A	GO:0005753
YDR298C	GO:0005753
YGR008C	GO:0005753
YKL016C	GO:0005753
YML081C-A	GO:0005753
YOL077W-A	GO:0005753
YBL099W	GO:0005754
YJR121W	GO:0005754
YBR039W	GO:0005756
YDL004W	GO:0005756
YPL271W	GO:0005756
YDR086C	GO:0005784
YER087C-B	GO:0005784
YLR378C	GO:0005784
YDR292C	GO:0005785
YKL154W	GO:0005785
YIR022W	GO:0005787
YJR010C-A	GO:0005787
YLR066W	GO:0005787
YML055W	GO:0005787
YFL037W	GO:0005827
YML085C	GO:0005827
YML124C	GO:0005827
YBR156C	GO:0005828
YEL061C	GO:0005828
YFL037W	GO:0005828
YGR113W	GO:0005828
YML085C	GO:0005828
YML124C	GO:0005828
YPL209C	GO:0005828
YDL143W	GO:0005832
YDR188W	GO:0005832
YDR212W	GO:0005832
YIL142W	GO:0005832
YJL008C	GO:0005832
YJL014W	GO:0005832
YJL111W	GO:0005832
YJR064W	GO:0005832
YER020W	GO:0005834
YHR005C	GO:0005834
YJR086W	GO:0005834
YOR212W	GO:0005834
YKL182W	GO:0005835
YPL231W	GO:0005835
YFR010W	GO:0005838
YJL124C	GO:0005845
YKL204W	GO:0005845
YOR276W	GO:0005845
YMR125W	GO:0005846
YPL178W	GO:0005846
YAL043C	GO:0005847
YDR195W	GO:0005847
YDR301W	GO:0005847
YER133W	GO:0005847
YGR156W	GO:0005847
YJR093C	GO:0005847
YKL018W	GO:0005847
YKL059C	GO:0005847
YKR002W	GO:0005847
YLR115W	GO:0005847
YLR277C	GO:0005847
YNL222W	GO:0005847
YNL317W	GO:0005847
YOR179C	GO:0005847
YPR107C	GO:0005847
YAL043C	GO:0005849
YDR228C	GO:0005849
YDR301W	GO:0005849
YGL044C	GO:0005849
YLR115W	GO:0005849
YLR277C	GO:0005849
YMR061W	GO:0005849
YOL123W	GO:0005849
YOR250C	GO:0005849
YER025W	GO:0005850
YJR007W	GO:0005850
YPL237W	GO:0005850
YDR211W	GO:0005851
YGR083C	GO:0005851
YKR026C	GO:0005851
YLR291C	GO:0005851
YOR260W	GO:0005851
YBR079C	GO:0005852
YDR429C	GO:0005852
YLR192C	GO:0005852
YMR012W	GO:0005852
YMR146C	GO:0005852
YMR309C	GO:0005852
YOR361C	GO:0005852
YAL003W	GO:0005853
YBR118W	GO:0005853
YKL081W	GO:0005853
YPR080W	GO:0005853
YDR252W	GO:0005854
YHR193C	GO:0005854
YPL037C	GO:0005854
YDR424C	GO:0005868
YDR488C	GO:0005868
YKR054C	GO:0005868
YMR299C	GO:0005868
YDR106W	GO:0005869
YHR129C	GO:0005869
YLL049W	GO:0005869
YMR294W	GO:0005869
YPL174C	GO:0005869
YBL063W	GO:0005871
YEL061C	GO:0005871
YGL216W	GO:0005871
YMR198W	GO:0005871
YPL155C	GO:0005871
YPL253C	GO:0005871
YJL042W	GO:0005874
YPL017C	GO:0005874
YPR141C	GO:0005874
YBL063W	GO:0005876
YBR156C	GO:0005876
YCL029C	GO:0005876
YCR002C	GO:0005876
YDR201W	GO:0005876
YDR218C	GO:0005876
YEL061C	GO:0005876
YGL061C	GO:0005876
YJR076C	GO:0005876
YKR037C	GO:0005876
YLR045C	GO:0005876
YOL069W	GO:0005876
YPL209C	GO:0005876
YBL031W	GO:0005880
YFL037W	GO:0005880
YGL216W	GO:0005880
YLR186W	GO:0005880
YML085C	GO:0005880
YML124C	GO:0005880
YOR058C	GO:0005880
YDR424C	GO:0005881
YDR488C	GO:0005881
YER016W	GO:0005881
YFL037W	GO:0005881
YGL216W	GO:0005881
YJR076C	GO:0005881
YKR054C	GO:0005881
YLR254C	GO:0005881
YML085C	GO:0005881
YML124C	GO:0005881
YMR198W	GO:0005881
YMR299C	GO:0005881
YOR269W	GO:0005881
YPL155C	GO:0005881
YPR141C	GO:0005881
YDR130C	GO:0005882
YML104C	GO:0005882
YFL039C	GO:0005884
YIL034C	GO:0005884
YKL007W	GO:0005884
YNL271C	GO:0005884
YOR239W	GO:0005884
YBR234C	GO:0005885
YDL029W	GO:0005885
YIL062C	GO:0005885
YJR065C	GO:0005885
YKL013C	GO:0005885
YLR370C	GO:0005885
YNR035C	GO:0005885
YGR240C	GO:0005945
YMR205C	GO:0005945
YBR126C	GO:0005946
YDR074W	GO:0005946
YML100W	GO:0005946
YMR261C	GO:0005946
YCL009C	GO:0005948
YMR108W	GO:0005948
YER090W	GO:0005950
YKL211C	GO:0005950
YJR109C	GO:0005951
YOR303W	GO:0005951
YJL164C	GO:0005952
YKL166C	GO:0005952
YPL203W	GO:0005952
YGL155W	GO:0005953
YKL019W	GO:0005953
YKL190W	GO:0005955
YLR433C	GO:0005955
YML057W	GO:0005955
YGL019W	GO:0005956
YIL035C	GO:0005956
YOR039W	GO:0005956
YOR061W	GO:0005956
YAL044C	GO:0005960
YDR019C	GO:0005960
YFL018C	GO:0005960
YMR189W	GO:0005960
YNL037C	GO:0005962
YOR136W	GO:0005962
YDL090C	GO:0005965
YKL019W	GO:0005965
YBR221C	GO:0005967
YER178W	GO:0005967
YGR193C	GO:0005967
YNL071W	GO:0005967
YJL031C	GO:0005968
YOR370C	GO:0005968
YPR176C	GO:0005968
YER070W	GO:0005971
YGR180C	GO:0005971
YIL066C	GO:0005971
YJL026W	GO:0005971
YGL207W	GO:0008023
YKL160W	GO:0008023
YDL147W	GO:0008180
YDL216C	GO:0008180
YDR179C	GO:0008180
YIL071C	GO:0008180
YMR025W	GO:0008180
YOL117W	GO:0008180
YDL232W	GO:0008250
YEL002C	GO:0008250
YGL022W	GO:0008250
YGL226C-A	GO:0008250
YJL002C	GO:0008250
YML019W	GO:0008250
YMR149W	GO:0008250
YOR085W	GO:0008250
YOR103C	GO:0008250
YIL034C	GO:0008290
YKL007W	GO:0008290
YDL007W	GO:0008540
YDR394W	GO:0008540
YGL048C	GO:0008540
YHR027C	GO:0008540
YHR200W	GO:0008540
YIL075C	GO:0008540
YKL145W	GO:0008540
YOR117W	GO:0008540
YOR259C	GO:0008540
YDL097C	GO:0008541
YDL147W	GO:0008541
YDR363W-A	GO:0008541
YDR427W	GO:0008541
YER021W	GO:0008541
YFR004W	GO:0008541
YFR052W	GO:0008541
YLR421C	GO:0008541
YOR261C	GO:0008541
YPR108W	GO:0008541
YBR278W	GO:0008622
YDR121W	GO:0008622
YNL262W	GO:0008622
YPR175W	GO:0008622
YDR121W	GO:0008623
YGL133W	GO:0008623
YJL065C	GO:0008623
YOR304W	GO:0008623
YFL022C	GO:0009328
YLR060W	GO:0009328
YNL088W	GO:0009330
YFR030W	GO:0009337
YJR137C	GO:0009337
YDR148C	GO:0009353
YFL018C	GO:0009353
YIL125W	GO:0009353
YIL139C	GO:0016035
YPL167C	GO:0016035
YEL003W	GO:0016272
YGR078C	GO:0016272
YJL179W	GO:0016272
YLR200W	GO:0016272
YML094W	GO:0016272
YNL153C	GO:0016272
YGL049C	GO:0016281
YGR162W	GO:0016281
YJL138C	GO:0016281
YKR059W	GO:0016281
YOL139C	GO:0016281
YHR023W	GO:0016460
YBR289W	GO:0016514
YDR073W	GO:0016514
YFL049W	GO:0016514
YGR275W	GO:0016514
YHL025W	GO:0016514
YJL176C	GO:0016514
YMR033W	GO:0016514
YNR023W	GO:0016514
YOR290C	GO:0016514
YPL016W	GO:0016514
YPL129W	GO:0016514
YPR034W	GO:0016514
YBL006C	GO:0016586
YCR020W-B	GO:0016586
YCR052W	GO:0016586
YDR303C	GO:0016586
YFR037C	GO:0016586
YGR056W	GO:0016586
YGR275W	GO:0016586
YHR056C	GO:0016586
YIL126W	GO:0016586
YKR008W	GO:0016586
YLR033W	GO:0016586
YLR321C	GO:0016586
YLR357W	GO:0016586
YML127W	GO:0016586
YMR033W	GO:0016586
YMR091C	GO:0016586
YPL129W	GO:0016586
YPR034W	GO:0016586
YBR245C	GO:0016587
YFR013W	GO:0016587
YLR095C	GO:0016587
YMR044W	GO:0016587
YBR236C	GO:0016591
YDL115C	GO:0016591
YGR097W	GO:0016591
YCR081W	GO:0016592
YDR443C	GO:0016592
YGL151W	GO:0016592
YNL025C	GO:0016592
YPL042C	GO:0016592
YPL129W	GO:0016592
YBR279W	GO:0016593
YGL244W	GO:0016593
YLR418C	GO:0016593
YOL145C	GO:0016593
YOR123C	GO:0016593
YBL021C	GO:0016602
YGL237C	GO:0016602
YKL109W	GO:0016602
YOR358W	GO:0016602
YBR112C	GO:0017053
YCR084C	GO:0017053
YDR397C	GO:0017054
YER159C	GO:0017054
YDR062W	GO:0017059
YMR296C	GO:0017059
YHR024C	GO:0017087
YLR163C	GO:0017087
YGL105W	GO:0017102
YGL245W	GO:0017102
YGR264C	GO:0017102
YER157W	GO:0017119
YGL005C	GO:0017119
YGL223C	GO:0017119
YGR120C	GO:0017119
YML071C	GO:0017119
YNL041C	GO:0017119
YNL051W	GO:0017119
YPR105C	GO:0017119
YBR229C	GO:0017177
YDR221W	GO:0017177
YBR143C	GO:0018444
YDR172W	GO:0018444
YBR280C	GO:0019005
YDL132W	GO:0019005
YDR054C	GO:0019005
YDR131C	GO:0019005
YDR219C	GO:0019005
YDR306C	GO:0019005
YDR328C	GO:0019005
YFL009W	GO:0019005
YIL046W	GO:0019005
YJL149W	GO:0019005
YJR090C	GO:0019005
YLR097C	GO:0019005
YLR224W	GO:0019005
YLR352W	GO:0019005
YLR368W	GO:0019005
YML088W	GO:0019005
YNL311C	GO:0019005
YOL133W	GO:0019005
YOR080W	GO:0019005
YGL011C	GO:0019773
YGR135W	GO:0019773
YGR253C	GO:0019773
YML092C	GO:0019773
YMR314W	GO:0019773
YOL038W	GO:0019773
YOR362C	GO:0019773
YBL041W	GO:0019774
YER012W	GO:0019774
YER094C	GO:0019774
YFR050C	GO:0019774
YJL001W	GO:0019774
YOR157C	GO:0019774
YPR103W	GO:0019774
YBR254C	GO:0030008
YDR108W	GO:0030008
YDR246W	GO:0030008
YDR407C	GO:0030008
YDR472W	GO:0030008
YEL048C	GO:0030008
YGR166W	GO:0030008
YKR068C	GO:0030008
YML077W	GO:0030008
YMR218C	GO:0030008
YOR115C	GO:0030008
YDR252W	GO:0030014
YFL028C	GO:0030014
YKR036C	GO:0030014
YNL278W	GO:0030014
YAL021C	GO:0030015
YCR093W	GO:0030015
YDL165W	GO:0030015
YER068W	GO:0030015
YGR134W	GO:0030015
YIL038C	GO:0030015
YNL288W	GO:0030015
YNR052C	GO:0030015
YPR072W	GO:0030015
YGR057C	GO:0030120
YKL176C	GO:0030120
YHL019C	GO:0030121
YKL135C	GO:0030121
YLR170C	GO:0030121
YPL259C	GO:0030121
YPR029C	GO:0030121
YBL037W	GO:0030122
YJR005W	GO:0030122
YJR058C	GO:0030122
YOL062C	GO:0030122
YBR288C	GO:0030123
YGR261C	GO:0030123
YJL024C	GO:0030123
YPL195W	GO:0030123
YDR153C	GO:0030125
YGL206C	GO:0030125
YGR167W	GO:0030125
YJR125C	GO:0030125
YDL145C	GO:0030126
YDR238C	GO:0030126
YER122C	GO:0030126
YFR051C	GO:0030126
YGL137W	GO:0030126
YIL076W	GO:0030126
YNL287W	GO:0030126
YPL010W	GO:0030126
YDL195W	GO:0030127
YHR098C	GO:0030127
YIL109C	GO:0030127
YLR208W	GO:0030127
YNL049C	GO:0030127
YPL218W	GO:0030127
YPR181C	GO:0030127
YDR060W	GO:0030690
YOR206W	GO:0030690
YLR002C	GO:0030691
YOR206W	GO:0030691
YDL148C	GO:0030692
YPR144C	GO:0030692
YDL042C	GO:0030869
YFR028C	GO:0030869
YJL076W	GO:0030869
YDR369C	GO:0030870
YMR224C	GO:0030870
YNL250W	GO:0030870
YLR288C	GO:0030896
YOR368W	GO:0030896
YPL194W	GO:0030896
YDL077C	GO:0030897
YDR080W	GO:0030897
YLR148W	GO:0030897
YLR396C	GO:0030897
YMR231W	GO:0030897
YPL045W	GO:0030897
YHR012W	GO:0030904
YJL053W	GO:0030904
YJL154C	GO:0030904
YOR069W	GO:0030904
YOR132W	GO:0030904
YOR069W	GO:0030905
YOR132W	GO:0030905
YHR012W	GO:0030906
YJL053W	GO:0030906
YJL154C	GO:0030906
YDL056W	GO:0030907
YLR182W	GO:0030907
YNL309W	GO:0030907
YNR009W	GO:0030907
YDL105W	GO:0030915
YDR288W	GO:0030915
YEL019C	GO:0030915
YER038C	GO:0030915
YLR007W	GO:0030915
YLR383W	GO:0030915
YML023C	GO:0030915
YOL034W	GO:0030915
YBL080C	GO:0030956
YGR102C	GO:0030956
YMR293C	GO:0030956
YDL002C	GO:0031011
YDR190C	GO:0031011
YFL013C	GO:0031011
YFL039C	GO:0031011
YGL150C	GO:0031011
YJL081C	GO:0031011
YLR052W	GO:0031011
YNL059C	GO:0031011
YOR141C	GO:0031011
YOR189W	GO:0031011
YPL129W	GO:0031011
YPL235W	GO:0031011
YDL116W	GO:0031080
YGL092W	GO:0031080
YGL100W	GO:0031080
YJR042W	GO:0031080
YKL057C	GO:0031080
YKR082W	GO:0031080
YLR208W	GO:0031080
YCR002C	GO:0031105
YDR218C	GO:0031105
YGR059W	GO:0031105
YHR107C	GO:0031105
YJR076C	GO:0031105
YLR314C	GO:0031105
YAL030W	GO:0031201
YBL050W	GO:0031201
YDR468C	GO:0031201
YDR498C	GO:0031201
YGL095C	GO:0031201
YGL098W	GO:0031201
YGL212W	GO:0031201
YGR009C	GO:0031201
YHL031C	GO:0031201
YIL004C	GO:0031201
YKL006C-A	GO:0031201
YKL196C	GO:0031201
YLR026C	GO:0031201
YLR078C	GO:0031201
YLR093C	GO:0031201
YLR268W	GO:0031201
YMR017W	GO:0031201
YMR197C	GO:0031201
YNR049C	GO:0031201
YOL018C	GO:0031201
YOR075W	GO:0031201
YOR106W	GO:0031201
YOR327C	GO:0031201
YPL232W	GO:0031201
YBR171W	GO:0031207
YLR292C	GO:0031207
YOR254C	GO:0031207
YPL094C	GO:0031207
YLR246W	GO:0031211
YOL110W	GO:0031211
YGL094C	GO:0031251
YKL025C	GO:0031251
YER018C	GO:0031262
YIL144W	GO:0031262
YMR117C	GO:0031262
YOL069W	GO:0031262
YBL002W	GO:0031298
YBL003C	GO:0031298
YBL023C	GO:0031298
YBR009C	GO:0031298
YBR010W	GO:0031298
YBR202W	GO:0031298
YCL061C	GO:0031298
YDR013W	GO:0031298
YDR224C	GO:0031298
YDR225W	GO:0031298
YDR489W	GO:0031298
YEL032W	GO:0031298
YGL201C	GO:0031298
YGL207W	GO:0031298
YIL150C	GO:0031298
YJL072C	GO:0031298
YLR103C	GO:0031298
YLR274W	GO:0031298
YML069W	GO:0031298
YMR048W	GO:0031298
YNL273W	GO:0031298
YOL006C	GO:0031298
YOL146W	GO:0031298
YPR019W	GO:0031298
YPR135W	GO:0031298
YDR092W	GO:0031371
YGL087C	GO:0031371
YBR087W	GO:0031389
YER173W	GO:0031389
YJR068W	GO:0031389
YNL290W	GO:0031389
YOL094C	GO:0031389
YBR087W	GO:0031390
YCL016C	GO:0031390
YHR191C	GO:0031390
YJR068W	GO:0031390
YMR078C	GO:0031390
YNL290W	GO:0031390
YOL094C	GO:0031390
YBR087W	GO:0031391
YJR068W	GO:0031391
YNL290W	GO:0031391
YOL094C	GO:0031391
YOR144C	GO:0031391
YDL040C	GO:0031415
YHR013C	GO:0031415
YOR253W	GO:0031415
YOL076W	GO:0031416
YPR131C	GO:0031416
YCR020C-A	GO:0031417
YEL053C	GO:0031417
YPR051W	GO:0031417
YLR234W	GO:0031422
YMR190C	GO:0031422
YPL024W	GO:0031422
YDL017W	GO:0031431
YDR052C	GO:0031431
YBR114W	GO:0031463
YGR003W	GO:0031463
YJR052W	GO:0031463
YNL230C	GO:0031463
YPL046C	GO:0031463
YAL029C	GO:0031475
YOR326W	GO:0031475
YDL175C	GO:0031499
YIL079C	GO:0031499
YJL050W	GO:0031499
YNL299W	GO:0031499
YOL115W	GO:0031499
YBR004C	GO:0031501
YNL158W	GO:0031501
YAL023C	GO:0031502
YDL095W	GO:0031502
YDR390C	GO:0031510
YPR180W	GO:0031510
YJL125C	GO:0031515
YNL062C	GO:0031515
YDR328C	GO:0031518
YGR140W	GO:0031518
YMR094W	GO:0031518
YMR168C	GO:0031518
YGL130W	GO:0031533
YPL228W	GO:0031533
YDR422C	GO:0031588
YDR477W	GO:0031588
YER027C	GO:0031588
YGL115W	GO:0031588
YGL208W	GO:0031588
YHR186C	GO:0031931
YJR066W	GO:0031931
YKL203C	GO:0031931
YNL006W	GO:0031931
YPL180W	GO:0031931
YER093C	GO:0031932
YJL058C	GO:0031932
YKL203C	GO:0031932
YMR068W	GO:0031932
YNL006W	GO:0031932
YOL078W	GO:0031932
YAL029C	GO:0031941
YOR326W	GO:0031941
YCL044C	GO:0031942
YMR115W	GO:0031942
YPR024W	GO:0031942
YGR063C	GO:0032044
YML010W	GO:0032044
YDR137W	GO:0032045
YDR211W	GO:0032045
YGR083C	GO:0032045
YKR026C	GO:0032045
YLR039C	GO:0032045
YLR291C	GO:0032045
YOR260W	GO:0032045
YDR180W	GO:0032116
YER147C	GO:0032116
YDR490C	GO:0032126
YGR086C	GO:0032126
YGR130C	GO:0032126
YML052W	GO:0032126
YMR031C	GO:0032126
YMR086W	GO:0032126
YOL100W	GO:0032126
YPL004C	GO:0032126
YBR156C	GO:0032133
YHR199C-A	GO:0032133
YJR089W	GO:0032133
YPL209C	GO:0032133
YMR075W	GO:0032221
YNL330C	GO:0032221
YOL004W	GO:0032221
YPL139C	GO:0032221
YPR023C	GO:0032221
YDR279W	GO:0032299
YLR154C	GO:0032299
YNL072W	GO:0032299
YHR120W	GO:0032300
YDR097C	GO:0032301
YOL090W	GO:0032301
YCR092C	GO:0032302
YOL090W	GO:0032302
YLR035C	GO:0032389
YMR167W	GO:0032389
YNL082W	GO:0032389
YMR167W	GO:0032390
YPL164C	GO:0032390
YCL031C	GO:0032545
YGR090W	GO:0032545
YLR223C	GO:0032545
YOR039W	GO:0032545
YFL024C	GO:0032777
YHR090C	GO:0032777
YOR244W	GO:0032777
YJL006C	GO:0032806
YKL139W	GO:0032806
YML112W	GO:0032806
YGL090W	GO:0032807
YLR265C	GO:0032807
YOR005C	GO:0032807
YAL010C	GO:0032865
YAL048C	GO:0032865
YGL219C	GO:0032865
YLL006W	GO:0032865
YOL009C	GO:0032865
YDR004W	GO:0033062
YDR076W	GO:0033062
YBL052C	GO:0033100
YJR082C	GO:0033100
YOR064C	GO:0033100
YPL129W	GO:0033100
YPR031W	GO:0033100
YBR195C	GO:0033186
YML102W	GO:0033186
YPR018W	GO:0033186
YKL017C	GO:0033203
YER072W	GO:0033254
YFL004W	GO:0033254
YJL012C	GO:0033254
YPL019C	GO:0033254
YDR181C	GO:0033255
YMR127C	GO:0033255
YOR213C	GO:0033255
YAL002W	GO:0033263
YDR495C	GO:0033263
YLR148W	GO:0033263
YLR396C	GO:0033263
YMR231W	GO:0033263
YPL045W	GO:0033263
YER111C	GO:0033309
YLR182W	GO:0033309
YNL309W	GO:0033309
YOR083W	GO:0033309
YCR086W	GO:0033551
YDR439W	GO:0033551
YER106W	GO:0033551
YPL204W	GO:0033551
YBR228W	GO:0033557
YLR135W	GO:0033557
YHL002W	GO:0033565
YNR006W	GO:0033565
YER145C	GO:0033573
YMR058W	GO:0033573
YGR200C	GO:0033588
YHR187W	GO:0033588
YLR384C	GO:0033588
YMR312W	GO:0033588
YPL086C	GO:0033588
YPL101W	GO:0033588
YGL116W	GO:0033597
YJL013C	GO:0033597
YJL030W	GO:0033597
YOR026W	GO:0033597
YAL013W	GO:0033698
YBL054W	GO:0033698
YBR095C	GO:0033698
YDL076C	GO:0033698
YDR207C	GO:0033698
YER088C	GO:0033698
YIL084C	GO:0033698
YKL185W	GO:0033698
YMR075W	GO:0033698
YMR263W	GO:0033698
YNL097C	GO:0033698
YNL330C	GO:0033698
YOL004W	GO:0033698
YPL139C	GO:0033698
YPL181W	GO:0033698
YPR023C	GO:0033698
YJL099W	GO:0034044
YKR027W	GO:0034044
YLR330W	GO:0034044
YMR237W	GO:0034044
YOR299W	GO:0034044
YDR137W	GO:0034066
YLR039C	GO:0034066
YBR170C	GO:0034098
YDL126C	GO:0034098
YGR048W	GO:0034098
YDR057W	GO:0034099
YJL034W	GO:0034099
YLR207W	GO:0034099
YFL036W	GO:0034245
YMR228W	GO:0034245
YBR097W	GO:0034271
YBR128C	GO:0034271
YLR240W	GO:0034271
YPL120W	GO:0034271
YBR097W	GO:0034272
YLR240W	GO:0034272
YLR360W	GO:0034272
YPL120W	GO:0034272
YGL180W	GO:0034273
YPR185W	GO:0034273
YBR217W	GO:0034274
YMR159C	GO:0034274
YPL149W	GO:0034274
YCR057C	GO:0034388
YDR449C	GO:0034388
YJL069C	GO:0034388
YLR129W	GO:0034388
YLR222C	GO:0034388
YLR409C	GO:0034388
YJR044C	GO:0034424
YOL129W	GO:0034424
YBR077C	GO:0034448
YGR163W	GO:0034448
YKR007W	GO:0034448
YBR077C	GO:0034449
YGR163W	GO:0034449
YKL143W	GO:0034449
YKR007W	GO:0034449
YML121W	GO:0034449
YDR324C	GO:0034455
YDR398W	GO:0034455
YGR128C	GO:0034455
YHR196W	GO:0034455
YJL109C	GO:0034455
YMR093W	GO:0034455
YPL126W	GO:0034455
YCL031C	GO:0034456
YGL019W	GO:0034456
YGR090W	GO:0034456
YIL035C	GO:0034456
YOR039W	GO:0034456
YOR061W	GO:0034456
YHR148W	GO:0034457
YJR002W	GO:0034457
YNL075W	GO:0034457
YBL041W	GO:0034515
YDL097C	GO:0034515
YDL147W	GO:0034515
YDR363W-A	GO:0034515
YDR427W	GO:0034515
YER012W	GO:0034515
YER094C	GO:0034515
YFR004W	GO:0034515
YFR050C	GO:0034515
YFR052W	GO:0034515
YGL011C	GO:0034515
YGL048C	GO:0034515
YGR135W	GO:0034515
YGR253C	GO:0034515
YHR027C	GO:0034515
YIL075C	GO:0034515
YJL001W	GO:0034515
YLR148W	GO:0034515
YLR421C	GO:0034515
YML092C	GO:0034515
YMR314W	GO:0034515
YOL038W	GO:0034515
YOR157C	GO:0034515
YOR261C	GO:0034515
YOR362C	GO:0034515
YPR103W	GO:0034515
YBR105C	GO:0034657
YCL039W	GO:0034657
YDR255C	GO:0034657
YGL227W	GO:0034657
YIL017C	GO:0034657
YIL097W	GO:0034657
YMR135C	GO:0034657
YBR103W	GO:0034967
YCR033W	GO:0034967
YDR155C	GO:0034967
YGL194C	GO:0034967
YIL112W	GO:0034967
YKR029C	GO:0034967
YOL068C	GO:0034967
YDL003W	GO:0034990
YFL008W	GO:0034990
YIL026C	GO:0034990
YJL074C	GO:0034990
YGL207W	GO:0035101
YML069W	GO:0035101
YDR359C	GO:0035267
YEL018W	GO:0035267
YFL024C	GO:0035267
YFL039C	GO:0035267
YGR002C	GO:0035267
YHR090C	GO:0035267
YHR099W	GO:0035267
YJL081C	GO:0035267
YJR082C	GO:0035267
YNL107W	GO:0035267
YNL136W	GO:0035267
YOR244W	GO:0035267
YPR023C	GO:0035267
YBR058C-A	GO:0035339
YDR062W	GO:0035339
YGR038W	GO:0035339
YKL212W	GO:0035339
YLR350W	GO:0035339
YMR296C	GO:0035339
YHR154W	GO:0035361
YJL047C	GO:0035361
YLR320W	GO:0035361
YPR164W	GO:0035361
YLR430W	GO:0035649
YNL251C	GO:0035649
YPL190C	GO:0035649
YDR140W	GO:0035657
YNR046W	GO:0035657
YBR131W	GO:0035658
YGL124C	GO:0035658
YBL104C	GO:0035859
YDR128W	GO:0035859
YEL062W	GO:0035859
YGL100W	GO:0035859
YHL023C	GO:0035859
YJR138W	GO:0035859
YLR208W	GO:0035859
YOL138C	GO:0035859
YKL186C	GO:0042272
YPL169C	GO:0042272
YBL023C	GO:0042555
YBR202W	GO:0042555
YEL032W	GO:0042555
YGL201C	GO:0042555
YLR274W	GO:0042555
YPR019W	GO:0042555
YEL020W-A	GO:0042719
YGR181W	GO:0042719
YHR005C-A	GO:0042719
YJR135W-A	GO:0042719
YEL059C-A	GO:0042720
YMR035W	GO:0042720
YMR150C	GO:0042720
YBR091C	GO:0042721
YDL217C	GO:0042721
YEL020W-A	GO:0042721
YHR005C-A	GO:0042721
YJL054W	GO:0042721
YKL141W	GO:0042721
YOR297C	GO:0042721
YBR233W-A	GO:0042729
YDR016C	GO:0042729
YDR201W	GO:0042729
YDR320C-A	GO:0042729
YGL061C	GO:0042729
YGR113W	GO:0042729
YKL052C	GO:0042729
YKL138C-A	GO:0042729
YKR037C	GO:0042729
YKR083C	GO:0042729
YDR331W	GO:0042765
YHR188C	GO:0042765
YLR088W	GO:0042765
YLR459W	GO:0042765
YFL009W	GO:0043224
YIL046W	GO:0043224
YDR202C	GO:0043291
YDR328C	GO:0043291
YJR033C	GO:0043291
YDL201W	GO:0043527
YDR165W	GO:0043527
YNR046W	GO:0043528
YOL124C	GO:0043528
YDL100C	GO:0043529
YER083C	GO:0043529
YGL020C	GO:0043529
YBR070C	GO:0043541
YBR243C	GO:0043541
YGL047W	GO:0043541
YMR106C	GO:0043564
YMR284W	GO:0043564
YDL102W	GO:0043625
YJR006W	GO:0043625
YJR043C	GO:0043625
YBR088C	GO:0043626
YMR287C	GO:0045025
YPL029W	GO:0045025
YBL099W	GO:0045261
YDL004W	GO:0045261
YJR121W	GO:0045261
YPL271W	GO:0045261
YFL037W	GO:0045298
YML085C	GO:0045298
YML124C	GO:0045298
YBR081C	GO:0046695
YBR198C	GO:0046695
YDR145W	GO:0046695
YDR167W	GO:0046695
YDR176W	GO:0046695
YDR392W	GO:0046695
YDR448W	GO:0046695
YER164W	GO:0046695
YGL066W	GO:0046695
YGL112C	GO:0046695
YGL252C	GO:0046695
YGR252W	GO:0046695
YHR099W	GO:0046695
YMR223W	GO:0046695
YMR236W	GO:0046695
YOL148C	GO:0046695
YPL254W	GO:0046695
YAR003W	GO:0048188
YBR175W	GO:0048188
YBR258C	GO:0048188
YDR469W	GO:0048188
YHR119W	GO:0048188
YKL018W	GO:0048188
YLR015W	GO:0048188
YPL138C	GO:0048188
YBR098W	GO:0048476
YDR386W	GO:0048476
YGL213C	GO:0055087
YLR398C	GO:0055087
YPR189W	GO:0055087
YFR002W	GO:0055125
YGL172W	GO:0055125
YGR119C	GO:0055125
YJL041W	GO:0055125
YER107C	GO:0055126
YIL115C	GO:0055126
YJL041W	GO:0055126
YJL061W	GO:0055126
YMR047C	GO:0055126
YDR190C	GO:0070209
YGR099W	GO:0070209
YHR099W	GO:0070209
YJR136C	GO:0070209
YKL033W	GO:0070209
YPL235W	GO:0070209
YPR085C	GO:0070209
YAL013W	GO:0070210
YBL054W	GO:0070210
YBR095C	GO:0070210
YBR103W	GO:0070210
YCR033W	GO:0070210
YDL076C	GO:0070210
YDR207C	GO:0070210
YER088C	GO:0070210
YGL194C	GO:0070210
YIL084C	GO:0070210
YKL185W	GO:0070210
YKR029C	GO:0070210
YLR183C	GO:0070210
YMR263W	GO:0070210
YNL097C	GO:0070210
YNL330C	GO:0070210
YOL004W	GO:0070210
YPL139C	GO:0070210
YPL181W	GO:0070210
YGL131C	GO:0070211
YMR176W	GO:0070211
YNL330C	GO:0070211
YGL174W	GO:0070274
YIR005W	GO:0070274
YLR016C	GO:0070274
YBR111W-A	GO:0070390
YDR159W	GO:0070390
YOL072W	GO:0070390
YOR257W	GO:0070390
YNL230C	GO:0070449
YPL046C	GO:0070449
YGR103W	GO:0070545
YMR049C	GO:0070545
YOR272W	GO:0070545
YLR018C	GO:0070762
YML031W	GO:0070762
YMR129W	GO:0070762
YFR019W	GO:0070772
YFR021W	GO:0070772
YLR386W	GO:0070772
YNL054W	GO:0070772
YNL325C	GO:0070772
YPL100W	GO:0070772
YMR053C	GO:0070822
YNL309W	GO:0070822
YNL330C	GO:0070822
YOL004W	GO:0070822
YDR295C	GO:0070823
YNL021W	GO:0070823
YPR179C	GO:0070823
YBL093C	GO:0070847
YBR193C	GO:0070847
YBR253W	GO:0070847
YDL005C	GO:0070847
YDR308C	GO:0070847
YER022W	GO:0070847
YGL025C	GO:0070847
YGL127C	GO:0070847
YGR104C	GO:0070847
YHR041C	GO:0070847
YHR058C	GO:0070847
YLR071C	GO:0070847
YMR112C	GO:0070847
YNL236W	GO:0070847
YNR010W	GO:0070847
YOL051W	GO:0070847
YOL135C	GO:0070847
YOR174W	GO:0070847
YPR070W	GO:0070847
YPR168W	GO:0070847
YBL014C	GO:0070860
YJL025W	GO:0070860
YML043C	GO:0070860
YDR367W	GO:0070916
YKL004W	GO:0070916
YGL145W	GO:0070939
YLR440C	GO:0070939
YNL258C	GO:0070939
YDL108W	GO:0070985
YDR460W	GO:0070985
YPR025C	GO:0070985
YBR283C	GO:0071261
YDR086C	GO:0071261
YER019C-A	GO:0071261
YKL088W	GO:0071513
YKR072C	GO:0071513
YOR054C	GO:0071513
YEL013W	GO:0071563
YBR111W-A	GO:0071819
YGL066W	GO:0071819
YMR223W	GO:0071819
YPL047W	GO:0071819
YBR137W	GO:0072380
YJR045C	GO:0072380
YLL026W	GO:0072380
YNL064C	GO:0072380
YOL111C	GO:0072380
YOR007C	GO:0072380
YOR164C	GO:0072380
YCL045C	GO:0072546
YGL231C	GO:0072546
YIL027C	GO:0072546
YJR088C	GO:0072546
YKL207W	GO:0072546
YLL014W	GO:0072546
YDR078C	GO:0097196
YHL006C	GO:0097196
YIL132C	GO:0097196
YLR376C	GO:0097196
YML030W	GO:0097249
YNR018W	GO:0097249
YCR060W	GO:0097255
YDR190C	GO:0097255
YHR034C	GO:0097255
YPL235W	GO:0097255
