# Supplementary material for: Exploring Overlapping Functional Units with Various Structure in Protein Interaction Networks
Source: PLoS One. 2012 Aug 20;7(8):e43092. doi: 10.1371/journal.pone.0043092 (PMC3423443; doi:10.1371/journal.pone.0043092)
Supplement: Table S3 — (XLS) [file pone.0043092.s003.xls]

## Sheet: Collins
Collins
Group 14 Density 0			P-value 0.000496981983470011
members	partners
YHR023W	YAL029C YGL106W YOR326W YPR188C
YOR035C	YOR326W
YPR149W	YEL013W YOR270C
	GOID	Term	P-value	The genes annotated to this term
BP	GO:0030036	actin cytoskeleton organization	0.000750758	YOR035C, YHR023W
	GO:0030029	actin filament-based process	0.00084161	YOR035C, YHR023W
CC	GO:0005933	cellular bud	0.00275764	YPR149W, YHR023W
MF	GO:0008092	cytoskeletal protein binding	0.000496982	YOR035C, YHR023W
Group 34 Density 0			P-value 0.000120242194986735
members	partners
YER127W	YDR299W YGR145W
YJL033W	YDL014W YDR299W YDR365C YGR145W YHR203C YMR290C
YNR054C	YBR048W YDR299W YDR365C YGR145W
	GOID	Term	P-value	The genes annotated to this term
BP	GO:0006364	rRNA processing	0.000120242	YJL033W, YER127W, YNR054C
	GO:0034470	ncRNA processing	0.000280967	YJL033W, YER127W, YNR054C
	GO:0042254	ribosome biogenesis	0.000287061	YJL033W, YER127W, YNR054C
CC	GO:0005730	nucleolus	0.000169219	YJL033W, YER127W, YNR054C
	GO:0031981	nuclear lumen	0.00221564	YJL033W, YER127W, YNR054C
MF	GO:0003723	RNA binding	0.0030349	YJL033W, YER127W, YNR054C
Group 36 Density 0			P-value 0.0000684722512095103
members	partners
YAL026C	YLR447C
YEL013W	YPR149W
YKL119C	YLR447C
YOR270C	YGR020C YLR447C YPR149W
	GOID	Term	P-value	The genes annotated to this term
BP	GO:0022607	cellular component assembly	6.84723e-05	YAL026C, YOR270C, YEL013W, YKL119C
	GO:0007035	vacuolar acidification	9.52582e-05	YOR270C, YKL119C
	GO:0045851	pH reduction	9.52582e-05	YOR270C, YKL119C
CC	No terms were found for this aspect with a corrected P-value <= 0.05
MF	GO:0042625	ATPase activity, coupled to transmembrane movement of ions	0.000315452	YAL026C, YOR270C
	GO:0015399	primary active transmembrane transporter activity	0.000915762	YAL026C, YOR270C
Group 40 Density 0			P-value 0.000648948578163373
members	partners
YLR264W	YBR189W YDR064W YNL096C
YML074C	YLR449W
YPL146C	YJL190C YLR449W YNL096C
YPR169W	YLR449W
	GOID	Term	P-value	The genes annotated to this term
BP	GO:0042273	ribosomal large subunit biogenesis	0.000938748	YPR169W, YPL146C
CC	GO:0005730	nucleolus	0.000648949	YPR169W, YPL146C, YML074C
	GO:0043228	non-membrane-bounded organelle	0.00163641	YLR264W, YPR169W, YPL146C, YML074C
MF	No terms were found for this aspect with a corrected P-value <= 0.05
Group 46 Density 0			P-value 0.000287060507481317
members	partners
YEL026W	YDL083C
YER131W	YDL083C YDR447C YGR034W YLR150W YLR435W YMR194W
YMR143W	YMR194W
	GOID	Term	P-value	The genes annotated to this term
BP	GO:0042254	ribosome biogenesis	0.000287061	YEL026W, YMR143W, YER131W
	GO:0000462	maturation of SSU-rRNA from tricistronic rRNA transcript (SSU-rRNA, 5.8S rRNA, LSU-rRNA)	0.000665041	YEL026W, YMR143W
CC	GO:0022627	cytosolic small ribosomal subunit	0.000295011	YMR143W, YER131W
	GO:0030684	preribosome	0.00151472	YEL026W, YMR143W
MF	GO:0003735	structural constituent of ribosome	0.00372154	YMR143W, YER131W
	GO:0005198	structural molecule activity	0.00977091	YMR143W, YER131W
Group 71 Density 0			P-value 0.0011268190286545
members	partners
YDR349C	YBR169C YLR430W
YGR159C	YGL120C
YNL224C	YGL120C
	GOID	Term	P-value	The genes annotated to this term
BP	GO:0042274	ribosomal small subunit biogenesis	0.00112682	YNL224C, YGR159C
CC	No terms were found for this aspect with a corrected P-value <= 0.05
MF	No terms were found for this aspect with a corrected P-value <= 0.05
Group 72 Density 0			P-value 1.47242595267478E-06
members	partners
YCL031C	YGR090W
YLR223C	YGR090W
YOR061W	YBR279W YER164W YGL019W YGL207W YGL244W YGR090W YHR131C YIL035C YKL088W YLR407W YLR418C YML069W YMR172W YOL145C YOR039W YOR123C
	GOID	Term	P-value	The genes annotated to this term
BP	No terms were found for this aspect with a corrected P-value <= 0.05
CC	GO:0032545	CURI complex	1.47243e-06	YLR223C, YCL031C
	GO:0034456	UTP-C complex	2.20841e-06	YOR061W, YCL031C
	GO:0005730	nucleolus	0.000169219	YOR061W, YLR223C, YCL031C
MF	No terms were found for this aspect with a corrected P-value <= 0.05
Group 75 Density 0			P-value 5.34177890647763E-09
members	partners
YAR014C	YER133W
YCR073W-A	YER133W YLR028C
YKL193C	YER133W YML016C
YLR028C	YCR073W-A YER133W YER177W YMR120C
YMR311C	YER133W
YNL233W	YER133W
YPL137C	YER133W
	GOID	Term	P-value	The genes annotated to this term
BP	GO:0043666	regulation of phosphoprotein phosphatase activity	1.5433e-05	YMR311C, YPL137C
	GO:0007059	chromosome segregation	0.000423654	YKL193C, YMR311C, YPL137C
	GO:0000271	polysaccharide biosynthetic process	0.000788371	YNL233W, YMR311C
CC	GO:0000131	incipient cellular bud site	0.00138334	YNL233W, YAR014C
MF	GO:0019888	protein phosphatase regulator activity	5.34178e-09	YKL193C, YMR311C, YPL137C, YAR014C
Group 81 Density 0			P-value 0.0000682817626986746
members	partners
YDR202C	YDR328C YJR033C
YMR258C	YDR328C YKR014C
YOR370C	YKR014C
	GOID	Term	P-value	The genes annotated to this term
BP	GO:0033124	regulation of GTP catabolic process	6.82818e-05	YOR370C, YMR258C
	GO:0050790	regulation of catalytic activity	0.00127521	YOR370C, YMR258C
CC	No terms were found for this aspect with a corrected P-value <= 0.05
MF	GO:0030695	GTPase regulator activity	0.000765544	YOR370C, YMR258C

## Sheet: Gavin
Gavin
Group 1 Density 0					P-value 1.40212252133681e-05
members	partners
YBL099W	YGR281W YLR052W
YDL100C	YBL076C
YDL192W	YLR052W
YPL218W	YLR052W
	GOID	Term						P-value				The genes annotated to this term
BP	GO:0009205	purine ribonucleoside triphosphate metabolic process						1.81019876622031e-05				YPL218W, YDL100C, YBL099W
	GO:0009144	purine nucleoside triphosphate metabolic process						1.8617e-05				YPL218W, YDL100C, YBL099W
	GO:0072521	purine-containing compound metabolic process						7.94240122928176e-05				YPL218W, YDL100C, YBL099W
CC	GO:0005794	Golgi apparatus						0.000184572043986001				YPL218W, YDL100C, YDL192W
MF	GO:0017111	nucleoside-triphosphatase activity						1.40212252133681e-05				YPL218W, YDL100C, YDL192W, YBL099W
	GO:0016462	pyrophosphatase activity						1.72894778927132e-05				YPL218W, YDL100C, YDL192W, YBL099W
	GO:0016817	hydrolase activity, acting on acid anhydrides						1.72894778927132e-05				YPL218W, YDL100C, YDL192W, YBL099W
Group 6 Density 0					P-value 3.71822984525482e-05
members	partners
YGL197W	YDL047W YJL098W YLR310C YMR308C
YLL021W	YMR308C
YMR310C	YBL032W YLR175W YMR308C
	GOID	Term						P-value				The genes annotated to this term
BP	GO:0022603	regulation of anatomical structure morphogenesis						3.71823e-05				YLL021W, YGL197W
	GO:0050793	regulation of developmental process						8.23527e-05				YLL021W, YGL197W
CC	No terms were found for this aspect with a corrected P-value <= 0.05.
MF	No terms were found for this aspect with a corrected P-value <= 0.05.
Group 14 Density 0					P-value 7.67349623787001e-05
members	partners
YDL191W	YBL007C YBL039C YHR052W YML126C YNL330C
YGL031C	YFR031C-A YGR214W YGR281W YHR170W YIL022W YML126C
YGR027C	YML126C
YKL125W	YML126C YPR080W
	GOID	Term						P-value				The genes annotated to this term
BP	GO:0002181	cytoplasmic translation						7.6735e-05				YDL191W, YGR027C, YGL031C
CC	GO:0022626	cytosolic ribosome						7.6735e-05				YDL191W, YGR027C, YGL031C
MF	GO:0003735	structural constituent of ribosome						0.000175233				YDL191W, YGR027C, YGL031C
	GO:0005198	structural molecule activity						0.000751707				YDL191W, YGR027C, YGL031C
Group 19 Density 1.515152e-02					P-value 0.000189228605987436
members	partners
YDR335W	YAL038W YDL055C YDR394W YFL037W YKL029C YKL104C YML085C
YFL045C	YAL038W YGL195W YJL130C YML085C YPL235W
YGR218W	YDL055C YDR062W YFL037W YGL048C YGL195W YHR019C YIL094C YJL130C YJR077C YKL029C YKL145W YKR059W YLR180W YML085C YMR186W YMR235C
YHL011C	YDL055C YGL030W YGR214W YKL029C YKL104C YKL181W YLR259C YML085C YMR186W YOR133W
YHR128W	YAL038W YDL055C YFL037W YJL130C YML085C YPL235W
YIL070C	YDL055C YIL094C YML085C YNL137C YOR326W
YLL018C	YDL055C YJL130C YOL120C
YLL040C	YDL055C YDL185W YFR009W YIL094C YJL130C YKL104C YLR180W YML085C YMR078C YOR133W
YOL098C	YAL038W YBL087C YDL055C YFL037W YIL075C YJL130C YKL145W YLR259C YOR133W
YOR136W	YAL038W YDR170C YDR388W YER110C YFL037W YGL195W YHR169W YIL094C YJL130C YLR048W YML085C YPL061W YPL226W YPL235W YPR080W
YOR160W	YAL038W YML085C YNR007C
YPL061W	YER089C YIL094C YKL104C YKL152C YLR180W YOR133W YOR136W YPL226W YPR080W
	GOID	Term						P-value				The genes annotated to this term
BP	GO:0034613	cellular protein localization						0.000640753				YLL040C, YOR160W, YGR218W, YFL045C, YDR335W
CC	No terms were found for this aspect with a corrected P-value <= 0.05.
MF	GO:0008565	protein transporter activity						0.000189229				YOR160W, YGR218W, YDR335W
Group 26 Density 0					P-value 1.3233838423441e-05
members	partners
YBL075C	YGL130W YKL088W YLR345W YOR250C
YER103W	YBL087C YER110C YGL130W YGL206C YIL094C YOR039W
YHR121W	YDR171W YGL130W YGR178C YHR174W
YPL228W	YGL130W YOR375C
	GOID	Term						P-value				The genes annotated to this term
BP	GO:0006616	SRP-dependent cotranslational protein targeting to membrane, translocation						1.32338e-05				YER103W, YBL075C
CC	No terms were found for this aspect with a corrected P-value <= 0.05.
MF	GO:0051082	unfolded protein binding						0.00103349				YER103W, YBL075C
Group 28 Density 9.523810e-03					P-value 5.36944098162575e-44
members	partners
YBL090W	YBR251W YHL004W YPL013C
YBR146W	YBR251W YDR036C YDR041W YHL004W YPL013C
YDR175C	YBR251W YDR036C YPL013C
YDR337W	YBR251W YDL126C YDL195W YDR036C YDR041W YDR311W YHL004W YPL013C
YDR347W	YBR251W YDR036C YDR041W YHL004W YIL093C YJR101W YPL013C
YGL129C	YBR251W YDR036C YDR041W YHL004W YPL013C
YGR084C	YBR251W YDR036C YDR041W YHL004W YPL013C
YGR215W	YBR251W YHL004W
YIL093C	YBR251W YDR036C YDR347W YHL004W YPL013C
YJR101W	YBR251W YDR041W YDR347W YHL004W YPL013C
YJR113C	YAR003W YBR251W YDR036C YDR041W YHL004W YPL013C
YKL155C	YBR251W YDR036C YDR041W YHL004W YPL013C
YMR158W	YHL004W YPL013C
YMR188C	YDR036C YDR041W YHL004W YPL013C
YNL137C	YBR251W YDR036C YDR041W YGR165W YHL004W YIL070C YPL013C
YNL306W	YBR251W YDR036C YDR041W YHL004W YPL013C
YNR037C	YBR251W YHL004W
YOR158W	YHL004W YPL013C
YOR204W	YBL038W YBR251W YDR041W YDR069C YDR164C YDR429C YFR031C-A YHL004W YML025C YMR304W YMR309C YOL120C YOR361C YPL013C YPR041W YPR175W
YOR243C	YBR251W YER165W YGL232W YGR162W YHL004W YLR432W YML056C
YPL118W	YBR251W YDR036C YDR041W YHL004W YPL013C
	GOID	Term						P-value				The genes annotated to this term
BP	GO:0032543	mitochondrial translation						7.52083e-32				YNR037C, YDR175C, YJR101W, YBR146W, YIL093C, YGR084C, YPL118W, YMR188C, YDR347W, YGR215W, YNL306W, YKL155C, YOR158W, YDR337W, YNL137C, YMR158W, YBL090W, YGL129C, YJR113C
	GO:0010467	gene expression						1.42895e-12				YOR204W, YNR037C, YDR175C, YJR101W, YBR146W, YIL093C, YGR084C, YPL118W, YMR188C, YDR347W, YGR215W, YNL306W, YKL155C, YOR158W, YDR337W, YNL137C, YOR243C, YMR158W, YBL090W, YGL129C, YJR113C
	GO:0034645	cellular macromolecule biosynthetic process						3.03832e-12				YOR204W, YNR037C, YDR175C, YJR101W, YBR146W, YIL093C, YGR084C, YPL118W, YMR188C, YDR347W, YGR215W, YNL306W, YKL155C, YOR158W, YDR337W, YNL137C, YMR158W, YBL090W, YGL129C, YJR113C
CC	GO:0000314	organellar small ribosomal subunit						5.36944e-44				YNR037C, YDR175C, YJR101W, YBR146W, YIL093C, YGR084C, YPL118W, YMR188C, YDR347W, YGR215W, YNL306W, YKL155C, YOR158W, YDR337W, YNL137C, YMR158W, YBL090W, YGL129C, YJR113C
	GO:0005763	mitochondrial small ribosomal subunit						5.36944e-44				YNR037C, YDR175C, YJR101W, YBR146W, YIL093C, YGR084C, YPL118W, YMR188C, YDR347W, YGR215W, YNL306W, YKL155C, YOR158W, YDR337W, YNL137C, YMR158W, YBL090W, YGL129C, YJR113C
MF	GO:0003735	structural constituent of ribosome						2.99721e-26				YNR037C, YDR175C, YJR101W, YBR146W, YIL093C, YGR084C, YPL118W, YMR188C, YDR347W, YGR215W, YNL306W, YKL155C, YOR158W, YDR337W, YNL137C, YMR158W, YBL090W, YGL129C, YJR113C
Group 29 Density 0					P-value 0.000188008398960939
members	partners
YAL036C	YGR162W YHR064C
YBR158W	YGR285C YHR064C
YHL015W	YHL034C YHR064C YNL308C
YKR057W	YGR285C YNL207W
YOR048C	YFR031C-A YGL246C YHR064C YJL154C
	GOID	Term						P-value				The genes annotated to this term
BP	GO:0002181	cytoplasmic translation						0.000188008				YHL015W, YKR057W, YAL036C
CC	GO:0022627	cytosolic small ribosomal subunit						0.000970684				YHL015W, YKR057W
MF	GO:0003735	structural constituent of ribosome						0.0118287				YHL015W, YKR057W
Group 32 Density 0					P-value 3.08466789573845e-05
members	partners
YBR263W	YFR031C-A
YGR204W	YDL055C YFR031C-A YLR441C
YML075C	YER095W YHR010W
YPL009C	YFR031C-A YHR010W YLR340W
	GOID	Term						P-value				The genes annotated to this term
BP	GO:0006730	one-carbon metabolic process						3.08467e-05				YGR204W, YBR263W
	GO:0044283	small molecule biosynthetic process						0.000404897				YGR204W, YBR263W, YML075C
CC	No terms were found for this aspect with a corrected P-value <= 0.05
MF	GO:0048037	cofactor binding						0.00366927				YBR263W, YML075C
Group 35 Density 0					P-value 1.04350007124713e-25
members	partners
YDL082W	YAL035W YAR014C YBR105C YDL195W YDR060W YFR031C-A YHR052W YJL033W YMR061W YOL077C YOR272W YPR041W
YEL054C	YAL035W YBL007C YBR017C YBR105C YDR060W YDR091C YER025W YER036C YFR031C-A YGL099W YGL120C YGR245C YGR285C YHR052W YHR064C
YGL076C	YAL035W YBR142W YDL055C YDL195W YDR060W YDR091C YDR101C YDR148C YFR001W YFR031C-A YGL111W YGR103W YGR245C YHR052W YHR085W YHR088W YIL125W YLL034C YLR074C YLR432W YLR449W YML126C YMR229C YNL023C YNL049C YNL175C YOL120C YOR206W YOR272W YPL085W YPL093W YPR016C YPR041W YPR181C
YGL103W	YBL007C YDL055C YDR060W YER036C YFR031C-A YHR052W YLR074C YML072C YNL110C YPL012W YPR189W
YHL033C	YAL035W YBR253W YER036C YHR064C YHR169W YJL033W YKR002W YLR074C YLR115W YLR410W
YHR010W	YAL035W YBL061C YBR011C YBR084W YCR057C YDL111C YDR060W YDR101C YDR148C YDR280W YDR496C YER006W YFL002C YFR031C-A YGL099W YGR103W YGR245C YGR281W YGR285C YHR052W YHR064C YIL125W YJL080C YKR081C YLR074C YLR175W YML075C YMR229C YNL061W YNL110C YNL132W YNL175C YOL077C YOL120C YPL009C YPL012W YPL043W YPL093W YPL211W YPR189W
YKL180W	YBR084W YBR247C YCR057C YDL076C YER036C YFR031C-A YHR170W YML126C YNL132W YNL330C YPL012W
YLL045C	YAL035W YBR142W YDL055C YDL126C YDR060W YDR091C YDR101C YDR496C YER006W YER025W YER036C YFL002C YFR001W YFR031C-A YGL099W YGL246C YGR162W YGR245C YHR052W YHR088W YHR167W YHR170W YLL034C YLR175W YLR432W YNL061W YNL110C YNL175C YOL077C YOR272W YPL043W YPL211W YPR016C YPR189W
YLR075W	YAL035W YBR009C YBR039W YBR084W YBR265W YDL055C YDL171C YDL195W YFR031C-A YGR281W YHR019C YHR064C YIL094C YJL080C YLR180W YNL049C YNL132W YOL120C YPL085W YPL226W YPR181C
YLR367W	YAL035W YBR142W YBR247C YCR057C YDR060W YDR091C YDR429C YER025W YFR031C-A YHL034C YIL161W YKL067W YLR196W YLR432W YNL132W YNL175C YNL207W YOL139C YOR056C YOR310C
YML073C	YBL039C YBL087C YBR142W YDL195W YER036C YFR031C-A YHR085W YHR169W YNL175C YPR041W
YMR142C	YAL035W YBL032W YBR009C YBR011C YCR057C YDL055C YDR060W YDR195W YFR001W YFR031C-A YHR019C YJL033W YJL074C YLL034C YLR074C YLR175W YML126C YNL061W YOL120C YPR016C
YMR194W	YAL035W YCR057C YER025W YGL099W YNL132W
YOR063W	YAL035W YBR142W YDR060W YDR101C YDR496C YER006W YER036C YER126C YFL002C YFR001W YFR031C-A YGL099W YGR103W YGR245C YGR285C YHR052W YHR064C YHR169W YHR170W YJL074C YKL135C YKR081C YLL034C YLR074C YLR449W YMR049C YNL061W YNL110C YNR053C YOL077C YOL120C YOR206W YPL012W YPL043W YPL226W YPL259C YPR016C YPR189W
YPL249C-A	YBL032W YBR142W YBR143C YDL055C YDL195W YDR060W YDR101C YDR388W YFR031C-A YGR245C YHR052W YKL135C YMR192W YNL061W YNL175C YOL120C
	GOID	Term						P-value				The genes annotated to this term
BP	GO:0002181	cytoplasmic translation						1.7029e-24				YMR142C, YKL180W, YGL103W, YEL054C, YLL045C, YOR063W, YML073C, YLR075W, YMR194W, YLR367W, YDL082W, YHL033C, YHR010W, YGL076C, YPL249C-A
	GO:0034645	cellular macromolecule biosynthetic process						2.8788e-10				YMR142C, YKL180W, YGL103W, YEL054C, YLL045C, YOR063W, YML073C, YLR075W, YMR194W, YLR367W, YDL082W, YHL033C, YHR010W, YGL076C, YPL249C-A
CC	GO:0022625	cytosolic large ribosomal subunit						1.0435e-25				YMR142C, YKL180W, YGL103W, YEL054C, YLL045C, YOR063W, YML073C, YLR075W, YMR194W, YDL082W, YHL033C, YHR010W, YGL076C, YPL249C-A
MF	GO:0003735	structural constituent of ribosome						1.24858e-22				YMR142C, YKL180W, YGL103W, YEL054C, YLL045C, YOR063W, YML073C, YLR075W, YMR194W, YLR367W, YDL082W, YHL033C, YHR010W, YGL076C, YPL249C-A
Group 40 Density 7.142857e-02					P-value 1.61854696425462e-07
members	partners
YCL011C	YDL014W YDR138W YGL120C YGR090W YGR162W YHL034C YHR167W YHR196W YJR145C YLR432W YNL139C YNL308C YOL139C
YCL037C	YDR296W YGL120C YGR081C YGR162W YHL034C YJL033W YLR175W YMR125W YNL251C YOR310C
YER165W	YBL003C YBL026W YBL032W YBL085W YBR060C YCR077C YDL087C YDL209C YDR121W YER029C YER112W YER172C YGL049C YGL094C YGL120C YGR162W YGR250C YHL034C YHR086W YHR165C YIL061C YIR001C YJL033W YJL203W YKL012W YLR175W YLR298C YLR430W YLR432W YML056C YML065W YML117W YMR125W YMR213W YMR240C YNL251C YNL261W YOL139C YOR243C YPL178W YPL190C YPR080W YPR175W
YGL049C	YBL032W YBR009C YER165W YHL034C YHR086W YIR001C YLR175W YMR125W YNL251C YOL139C YPL178W
YGL173C	YBL026W YBL032W YCR077C YDL087C YDR240C YDR378C YEL015W YER112W YER146W YGL120C YGR162W YHL034C YHR086W YJL124C YLR175W YLR432W YML056C YNL118C YNL147W YNL175C YNL251C YNL284C YNL308C YOL139C YOL149W YPL043W YPL190C
YHR216W	YAL035W YBL032W YBR142W YDL195W YDR228C YJL033W YJL101C YLR175W YLR432W YML056C YMR029C YMR061W YNL308C YOR250C
YNL262W	YBL003C YDR121W YGR162W YLR175W YMR078C YOL139C YPR175W
YOR243C	YBR251W YER165W YGL232W YGR162W YHL004W YLR432W YML056C
	GOID	Term						P-value				The genes annotated to this term
BP	No terms were found for this aspect with a corrected P-value <= 0.05
CC	GO:0035770	ribonucleoprotein granule						1.61855e-07				YGL173C, YER165W, YGL049C, YCL011C
	GO:0010494	cytoplasmic stress granule						1.70107e-06				YER165W, YGL049C, YCL011C
MF	GO:0003723	RNA binding						0.000196551				YGL173C, YER165W, YGL049C, YCL011C, YOR243C, YCL037C
Group 42 Density 0					P-value 3.90116631504186e-11
members	partners
YDR091C	YBR079C YDR429C YEL054C YGL076C YLL045C YLR367W YLR432W YML024W YML063W YMR309C YNL112W YOR096W YPL220W YPR041W
YLR192C	YBL072C YBR079C YDR429C YDR450W YMR309C YOR361C YPR041W
YMR146C	YBR079C YDR429C YJL002C YMR309C YOR361C YPR041W
YNL096C	YBR247C YOR361C YPR041W
YNL244C	YDR429C YOR361C
YOR204W	YBL038W YBR251W YDR041W YDR069C YDR164C YDR429C YFR031C-A YHL004W YML025C YMR304W YMR309C YOL120C YOR361C YPL013C YPR041W YPR175W
	GOID	Term						P-value				The genes annotated to this term
BP	GO:0006413	translational initiation						2.83036e-10				YLR192C, YOR204W, YNL244C, YDR091C, YMR146C
CC	GO:0005852	eukaryotic translation initiation factor 3 complex						1.5433e-05				YLR192C, YMR146C
	GO:0043614	multi-eIF complex						2.05688e-05				YNL244C, YMR146C
MF	GO:0003743	translation initiation factor activity						3.90117e-11				YLR192C, YOR204W, YNL244C, YDR091C, YMR146C
Group 44 Density 0					P-value 4.01487148756027e-11
members	partners
YBL104C	YER029C YER172C YGL190C
YBR065C	YER172C YHR165C YLL036C YLR117C YMR213W YPL151C
YCR063W	YER172C YHR165C YMR213W
YDR416W	YAL032C YDL209C YER029C YER172C YGR278W YHR165C YLL036C YLR117C YMR213W YPL213W
YER013W	YMR213W
YGL100W	YDL116W YER029C YER172C YGL092W YKL057C YLR208W
YHR156C	YER172C YHR165C
YJR050W	YER172C YLL036C YLR117C
YJR084W	YER029C
YPR101W	YER029C YER172C YLL036C YLR117C YMR213W
	GOID	Term						P-value				The genes annotated to this term
BP	GO:0000398	nuclear mRNA splicing, via spliceosome						4.01487e-11				YER013W, YCR063W, YJR084W, YPR101W, YJR050W, YDR416W, YBR065C
	GO:0000393	spliceosomal conformational changes to generate catalytic conformation						3.11376e-06				YER013W, YJR050W, YDR416W
CC	GO:0005681	spliceosomal complex						6.96756e-08				YER013W, YPR101W, YJR050W, YDR416W, YBR065C
	GO:0071007	U2-type catalytic step 2 spliceosome						1.54476e-07				YER013W, YJR050W, YDR416W
MF	GO:0000384	first spliceosomal transesterification activity						6.04876e-07				YPR101W, YJR050W, YDR416W
Group 50 Density 9.523810e-02					P-value 8.07883811623088e-10
members	partners
YBL023C	YBR126C
YBR265W	YBR126C YLR075W
YDR074W	YBR126C YML100W YMR261C
YML100W	YBR126C YDR074W YHL034C YKL182W YOR206W
YMR261C	YBR126C YDR074W
YNL076W	YBR126C YER177W YGL252C
YPR035W	YBR126C YDR171W
	GOID	Term						P-value				The genes annotated to this term
BP	GO:0005992	trehalose biosynthetic process						2.82228e-08				YDR074W, YML100W, YMR261C
	GO:0016138	glycoside biosynthetic process						2.82228e-08				YDR074W, YML100W, YMR261C
	GO:0046351	disaccharide biosynthetic process						2.82228e-08				YDR074W, YML100W, YMR261C
CC	GO:0005946	alpha,alpha-trehalose-phosphate synthase complex (UDP-forming)						3.23001571581852e-09				YDR074W, YML100W, YMR261C
MF	GO:0004805	trehalose-phosphatase activity						8.07883811623088e-10				YDR074W, YML100W, YMR261C
	GO:0019203	carbohydrate phosphatase activity						6.7671e-08				YDR074W, YML100W, YMR261C
	GO:0003825	alpha,alpha-trehalose-phosphate synthase (UDP-forming) activity						3.09145e-06				YML100W, YMR261C
Group 53 Density 0					P-value 4.4283465536474e-11
members	partners
YCR012W	YAR007C YDR161W YIL128W YML072C YNL192W YOR098C YPR093C
YHR174W	YDR161W YGR261C YHR121W YNL192W YOR098C YPR093C
YKL060C	YDR161W YOR098C YOR116C YPR093C
YKL152C	YDR161W YHR027C YLR153C YLR180W YOR098C YPL061W
	GOID	Term						P-value				The genes annotated to this term
BP	GO:0006094	gluconeogenesis						4.4283465536474e-11				YCR012W, YKL152C, YHR174W, YKL060C
	GO:0019319	hexose biosynthetic process						8.66132487698683e-11				YCR012W, YKL152C, YHR174W, YKL060C
	GO:0006096	glycolysis						1.83067267658953e-10				YCR012W, YKL152C, YHR174W, YKL060C
CC	GO:0001950	plasma membrane enriched fraction						0.00103349086824506				YCR012W, YHR174W
	GO:0005739	mitochondrion						0.00104549				YCR012W, YKL152C, YHR174W, YKL060C
MF	GO:0016829	lyase activity						0.00134448				YHR174W, YKL060C
Group 55 Density 0					P-value 8.83547901178698E-07
members	partners
YAL038W	YBR221C YDL055C YDL066W YDR148C YDR335W YER151C YER171W YFL045C YFR049W YHR128W YHR169W YIL128W YJL074C YJL101C YKL029C YLR153C YLR180W YOL098C YOR136W YOR160W YPR010C
YFL037W	YBR009C YDL055C YDR171W YDR214W YDR335W YGL001C YGL016W YGL195W YGL238W YGR218W YHR128W YIL094C YJL111W YJR132W YKL010C YKL029C YKL039W YLR106C YLR436C YML124C YMR304W YNL212W YOL098C YOL120C YOR136W YPL235W YPR010C
YJL130C	YBL087C YBR009C YBR017C YDR060W YDR069C YDR171W YDR190C YDR361C YER006W YER110C YER139C YFL045C YGR081C YGR218W YHR128W YIL094C YJR077C YKL010C YKL029C YKR059W YLL018C YLL040C YLR106C YLR180W YLR347C YLR436C YMR235C YMR246W YMR304W YMR308C YOL098C YOL120C YOR136W YPL020C YPL235W YPR010C YPR174C
YML085C	YBL039C YBR017C YDL015C YDR062W YDR127W YDR170C YDR214W YDR335W YDR434W YER086W YER171W YFL045C YGL195W YGR214W YGR218W YGR234W YHL011C YHR019C YHR128W YIL070C YIL094C YIL128W YJL039C YJR077C YJR132W YKL010C YKL029C YKL039W YLL001W YLL040C YLR153C YLR180W YML124C YMR296C YMR308C YNL272C YOR136W YOR160W YPL235W
	GOID	Term						P-value				The genes annotated to this term
BP	GO:0000743	nuclear migration involved in conjugation with cellular fusion						8.23783e-06				YFL037W, YML085C
	GO:0045143	homologous chromosome segregation						1.05892848252072e-05				YFL037W, YML085C
	GO:0051258	protein polymerization						1.05892848252072e-05				YFL037W, YML085C
CC	GO:0005827	polar microtubule						8.83548e-07				YFL037W, YML085C
	GO:0045298	tubulin complex						8.83548e-07				YFL037W, YML085C
	GO:0005828	kinetochore microtubule						6.17967e-06				YFL037W, YML085C
MF	GO:0035639	purine ribonucleoside triphosphate binding						0.000194375				YAL038W, YFL037W, YJL130C, YML085C
	GO:0017076	purine nucleotide binding						0.00020064				YAL038W, YFL037W, YJL130C, YML085C
	GO:0005200	structural constituent of cytoskeleton						0.000205533				YFL037W, YML085C
Group 56 Density 0					P-value 0.0039844656471339
members	partners
YAL042W	YML067C YML130C
YBR229C	YML067C
YLR342W	YBR254C YDR170C YEL036C YER155C YGL167C YGR231C YKR068C YML067C YML130C YPL094C
	GOID	Term						P-value				The genes annotated to this term
BP	GO:0070882	cellular cell wall organization or biogenesis						0.00398447				YLR342W, YBR229C
CC	No terms were found for this aspect with a corrected P-value <= 0.05
MF	No terms were found for this aspect with a corrected P-value <= 0.05
Group 69 Density 0					P-value 1.47242595267478e-06
members	partners
YGR250C	YER165W YIR001C YML056C
YJL052W	YGR192C YJL034W YML056C
YJR009C	YAL048C YDL188C YJL034W YKL010C YML056C YPL106C YPR080W
	GOID	Term						P-value				The genes annotated to this term
BP	GO:0006094	gluconeogenesis						7.47412268119189e-05				YJR009C, YJL052W
	GO:0019319	hexose biosynthetic process						0.000102489				YJR009C, YJL052W
	GO:0006096	glycolysis						0.00014623				YJR009C, YJL052W
CC	GO:0005811	lipid particle						0.000417443				YJR009C, YJL052W
	GO:0001950	plasma membrane enriched fraction						0.00170758				YJR009C, YJL052W
MF	GO:0004365	glyceraldehyde-3-phosphate dehydrogenase (NAD+) (phosphorylating) activity						1.47242595267478e-06				YJR009C, YJL052W
	GO:0016620	oxidoreductase activity, acting on the aldehyde or oxo group of donors, NAD or NADP as acceptor						9.27577e-05				YJR009C, YJL052W
	GO:0050661	NADP binding						9.27576538007347e-05				YJR009C, YJL052W
Group 73 Density 0					P-value 0.000716074492551618
members	partners
YDL058W	YBL035C YBR009C YBR143C
YIL129C	YBR143C YDR145W YDR240C YHL034C
YJR064W	YDL029W YNL212W YNR016C YOR187W
YLR386W	YBR143C
YLR429W	YBR143C YLR196W YLR274W
YPL083C	YBR143C YOR187W
	GOID	Term						P-value				The genes annotated to this term
BP	No terms were found for this aspect with a corrected P-value <= 0.05
CC	No terms were found for this aspect with a corrected P-value <= 0.05
MF	GO:0030674	protein binding, bridging						0.000716074				YLR386W, YLR429W
Group 76 Density 0					P-value 0.000194374839007132
members	partners
YBR025C	YBR175W YGL039W YGL195W YHR167W YHR169W YKL081W YLR153C YML062C YNL088W YNL272C
YDR502C	YDL015C YDR062W YHR169W YLR153C YLR180W YLR347C
YER070W	YER133W YHR169W YLR153C
YLR249W	YHR169W YJL098W YKL022C YKR014C YLR153C YOR249C YOR267C YPL266W YPR180W
	GOID	Term						P-value				The genes annotated to this term
BP	GO:0055086	nucleobase-containing small molecule metabolic process						0.000309753				YER070W, YLR249W, YDR502C
	GO:0034654	nucleobase-containing compound biosynthetic process						0.00188566				YER070W, YDR502C
CC	No terms were found for this aspect with a corrected P-value <= 0.05
MF	GO:0035639	purine ribonucleoside triphosphate binding						0.000194375				YER070W, YBR025C, YLR249W, YDR502C
Group 87 Density 9.523810e-02					P-value 2.31945128816375e-05
members	partners
YDL060W	YBR189W YBR247C YDL148C YDR025W YDR064W YDR447C YGR081C YIL069C YJL190C YJR123W YJR145C YKL143W YML024W YML063W YNL207W YOR056C YOR096W YOR145C YPL012W YPL204W YPL266W
YER007C-A	YBL072C YJR014W YJR145C YKL028W YML063W YNL178W
YGL171W	YBR031W YCR057C YDR449C YGR090W YIL069C YML063W YMR242C
YKL067W	YBL072C YBR009C YDL055C YDR064W YDR447C YGL030W YIL069C YLR367W YMR143W YNL178W YPL090C YPR010C
YOL123W	YBL072C YBR017C YDR025W YIL069C YLR340W YMR064W YPL081W
YOR056C	YBL072C YBR189W YBR247C YDL060W YDR025W YDR064W YDR447C YDR450W YIL069C YJR145C YLR367W YNL178W YNL207W YOR096W YOR293W
YPL204W	YBL072C YBR189W YBR247C YDL060W YDR025W YDR283C YDR447C YIL069C YJL190C YJR145C YKL143W YLR384C YML091C YMR116C YNL178W YNL207W YPL081W YPL086C YPL266W
	GOID	Term						P-value				The genes annotated to this term
BP	GO:0042254	ribosome biogenesis						2.31945128816375e-05				YER007C-A, YPL204W, YDL060W, YOR056C, YGL171W
	GO:0034470	ncRNA processing						0.000546404				YPL204W, YDL060W, YOR056C, YGL171W
CC	GO:0031974	membrane-enclosed lumen						0.000185661				YOL123W, YPL204W, YDL060W, YKL067W, YOR056C, YGL171W
	GO:0005730	nucleolus						0.000284859				YPL204W, YDL060W, YOR056C, YGL171W
	GO:0030529	ribonucleoprotein complex						0.000355216				YOL123W, YER007C-A, YDL060W, YOR056C, YGL171W
MF	No terms were found for this aspect with a corrected P-value <= 0.05
Group 88 Density 0					P-value 0.00026372997987081
members	partners
YAL041W	YDR012W YER114C YJL177W YLR340W
YBL022C	YBR084W YLR340W
YGR178C	YHR121W YLR340W
YMR192W	YLR274W YNL112W YNL209W YPL249C-A
	GOID	Term						P-value				The genes annotated to this term
BP	GO:0046578	regulation of Ras protein signal transduction						0.00026373				YMR192W, YAL041W
	GO:0051056	regulation of small GTPase mediated signal transduction						0.000302092				YMR192W, YAL041W
CC	GO:0000131	incipient cellular bud site						0.000401615				YMR192W, YAL041W
MF	GO:0005083	small GTPase regulator activity						0.000701336				YMR192W, YAL041W
Group 96 Density 0					P-value 5.21589108532574e-07
members	partners
YBR084C-A	YBL007C YBL039C YCR057C YKL135C YPR016C
YGL147C	YFR001W YKL135C YNL175C YPR016C
YPL090C	YAL016W YBL032W YBL035C YBL039C YKL067W YKL135C YPR041W YPR175W
YPR102C	YBL007C YBL032W YDR395W YER006W YGL099W YHR064C YKL135C YNL061W YNL175C YPL093W
	GOID	Term						P-value				The genes annotated to this term
BP	GO:0002181	cytoplasmic translation						5.21589108532574e-07				YBR084C-A, YPR102C, YPL090C, YGL147C
CC	GO:0022626	cytosolic ribosome						5.21589e-07				YBR084C-A, YPR102C, YPL090C, YGL147C
	GO:0022625	cytosolic large ribosomal subunit						1.18545e-05				YBR084C-A, YPR102C, YGL147C
MF	GO:0003735	structural constituent of ribosome						1.58694e-06				YBR084C-A, YPR102C, YPL090C, YGL147C
	GO:0019843	rRNA binding						0.00182113				YPR102C, YGL147C
Group 97 Density 9.523810e-02					P-value 2.40149265834001e-05
members	partners
YAR014C	YDL082W YER133W
YCR073W-A	YER133W YLR028C
YER070W	YER133W YHR169W YLR153C
YER177W	YDR001C YDR062W YDR099W YER133W YGL115W YGL252C YLR028C YNL076W
YKL193C	YER133W YML016C
YLR028C	YCR073W-A YER133W YER177W
YLR258W	YER133W
	GOID	Term						P-value				The genes annotated to this term
BP	GO:0055114	oxidation-reduction process						2.40149265834001e-05				YER070W, YER177W, YLR258W, YLR028C, YCR073W-A
	GO:0005977	glycogen metabolic process						0.000357189				YER177W, YLR258W
	GO:0015980	energy derivation by oxidation of organic compounds						0.000375894				YER177W, YLR258W, YLR028C
CC	No terms were found for this aspect with a corrected P-value <= 0.05
MF	GO:0008599	protein phosphatase type 1 regulator activity						5.64401e-05				YKL193C, YAR014C
Group 98 Density 0					P-value 0.0000206935095768303
members	partners
YGR054W	YBR247C YNL207W
YKL143W	YBR247C YDL060W YNL207W YPL204W
YLR264W	YBR247C YNL207W YOR310C YOR361C
YOR145C	YBR247C YCR057C YDL060W YGR090W YHR196W YNL207W YPL126W
YPL266W	YBR247C YCR057C YDL060W YGR090W YHR196W YLR249W YNL207W YPL012W YPL204W YPR137W
	GOID	Term						P-value				The genes annotated to this term
BP	GO:0042254	ribosome biogenesis						8.93206e-05				YOR145C, YLR264W, YPL266W, YKL143W
CC	GO:0030529	ribonucleoprotein complex						2.06935e-05				YOR145C, YLR264W, YPL266W, YGR054W, YKL143W
	GO:0030684	preribosome						0.000111066				YOR145C, YPL266W, YKL143W
	GO:0022627	cytosolic small ribosomal subunit						0.000970684				YLR264W, YGR054W
MF	No terms were found for this aspect with a corrected P-value <= 0.05
Group 100 Density 0					P-value 3.71822984525482e-05
members	partners
YDL203C	YBR011C YLR371W
YJR042W	YDL116W YGL092W YLR208W YLR371W
YPL169C	YDL116W YLR371W
	GOID	Term						P-value				The genes annotated to this term
BP	GO:0000055	ribosomal large subunit export from nucleus						3.71822984525482e-05				YJR042W, YPL169C
	GO:0033750	ribosome localization						0.000114429				YJR042W, YPL169C
CC	GO:0005643	nuclear pore						0.000233722				YJR042W, YPL169C
MF	GO:0005198	structural molecule activity						0.00977091				YJR042W, YPL169C
Group 103 Density 0					P-value 2.55267132454647e-06
members	partners
YCR031C	YBL039C YBR247C YCR057C YDL055C YDL166C YDR060W YHL034C YNL308C
YDR382W	YCR057C YDL195W YDR060W YDR496C YPR189W
YGR034W	YCR057C YDR060W
YMR143W	YCR057C YDR060W YGL120C YHL034C YKL067W YNL132W
YNR043W	YCR057C
	GOID	Term						P-value				The genes annotated to this term
BP	GO:0002181	cytoplasmic translation						2.55267132454647e-06				YGR034W, YDR382W, YMR143W, YCR031C
CC	GO:0022627	cytosolic small ribosomal subunit						0.000970684				YMR143W, YCR031C
MF	GO:0003735	structural constituent of ribosome						7.7118e-06				YGR034W, YDR382W, YMR143W, YCR031C
Group 110 Density 0					P-value 0.00204106296374868
members	partners
YIL109C	YCR028C-A YDL195W YDR517W YGR155W YLR208W YPL085W YPR181C
YLR150W	YBL007C YBL032W YDL195W YLR330W
YNL112W	YBL032W YDL195W YDR091C YFR031C-A YGL048C YGR214W YLR048W YMR192W
YOR234C	YDL195W YDR060W
YPR043W	YDL195W YER006W
	GOID	Term						P-value				The genes annotated to this term
BP	No terms were found for this aspect with a corrected P-value <= 0.05
CC	GO:0022625	cytosolic large ribosomal subunit						0.00204106				YOR234C, YPR043W
MF	GO:0003735	structural constituent of ribosome						0.0118287				YOR234C, YPR043W
Group 112 Density 0					P-value 4.70874416714314e-12
members	partners
YCL054W	YFR001W YKR081C YNL110C YNL175C
YDL031W	YDR496C YER006W YFR001W YGR103W YHR052W YKR081C YNL061W YNL110C YNL175C YOL077C YOR206W YOR272W YPR016C
YDL075W	YDL195W YDR060W YDR101C YFR001W YGR162W YHR052W YLR074C YNL110C YNL175C YNR053C
YDR087C	YAL007C YHR052W YKR081C YNL061W YOL077C YOR272W
YGL103W	YBL007C YDL055C YDR060W YER036C YFR031C-A YHR052W YLR074C YML072C YNL110C YPL012W YPR189W
YGL147C	YFR001W YKL135C YNL175C YPR016C
YIL133C	YBR009C YBR011C YDR060W YER025W YFR001W YLR175W YLR410W YOR206W YPL043W YPR016C YPR041W
YKL009W	YDR101C YER126C YFR001W YHR052W YLR074C YNL061W YNL175C YNR053C YOL077C YOR206W YOR272W YPR016C
YKL172W	YFR001W YHR052W YKR081C YOL077C
YLL008W	YDR496C YFR001W YGR103W YHR052W YKR081C YNL061W YNL110C YOL077C YOR272W YPL043W YPR016C
YLR002C	YER006W YFL002C YFR001W YGR103W YHR052W YKR081C YLR449W YOL077C YOR206W YOR272W YPR016C
YLR029C	YBR009C YCR057C YDR060W YFR031C-A YHR169W YMR229C YOL041C YOL077C YPR016C
YLR276C	YDR060W YDR496C YKR081C YMR308C YPL043W
YNL002C	YBR142W YDR060W YDR101C YDR496C YER126C YFL002C YFR001W YGR103W YGR245C YHR085W YKR081C YLR074C YMR049C YNL110C YNL175C YOL077C YOR206W YOR272W YPL043W YPR016C
YNL182C	YCR072C YDR101C YFR001W YGR245C YHR052W YHR085W YHR197W YLR074C YNL110C YNR053C YPR016C
YOL127W	YBR142W YDL195W YDR496C YER006W YFL002C YFR001W YFR031C-A YGR245C YGR285C YHR052W YKR081C YLR074C YML126C YOL077C YPL043W YPR189W
YPL143W	YCR057C YFR031C-A YHR052W YNL061W YNL330C
YPL249C-A	YBL032W YBR142W YBR143C YDL055C YDL195W YDR060W YDR101C YDR388W YFR031C-A YGR245C YHR052W YKL135C YMR192W YNL061W YNL175C YOL120C
	GOID	Term						P-value				The genes annotated to this term
BP	GO:0042273	ribosomal large subunit biogenesis						1.86734e-11				YOL127W, YKL009W, YLL008W, YNL182C, YCL054W, YNL002C, YLR276C, YDL031W
	GO:0010467	gene expression						7.11328e-11				YGL103W, YLR029C, YLL008W, YGL147C, YCL054W, YNL002C, YDR087C, YPL143W, YLR276C, YKL172W, YPL249C-A, YIL133C, YKL009W, YOL127W, YNL182C, YLR002C, YDL075W, YDL031W
	GO:0000027	ribosomal large subunit assembly						5.19304702791456e-10				YOL127W, YLR276C, YKL009W, YLL008W, YDL031W, YNL182C
CC	GO:0030529	ribonucleoprotein complex						4.70874416714314e-12				YGL103W, YOL127W, YKL009W, YLR029C, YLL008W, YGL147C, YCL054W, YLR002C, YNL002C, YDL075W, YDR087C, YPL143W, YKL172W, YPL249C-A, YIL133C
	GO:0043228	non-membrane-bounded organelle						1.96696e-11				YGL103W, YLR029C, YLL008W, YGL147C, YCL054W, YNL002C, YDR087C, YPL143W, YLR276C, YKL172W, YPL249C-A, YIL133C, YKL009W, YOL127W, YLR002C, YDL075W, YDL031W
	GO:0030687	preribosome, large subunit precursor						2.20663125551599e-11				YLR002C, YNL002C, YDR087C, YKL172W, YKL009W, YLL008W, YCL054W
MF	GO:0003735	structural constituent of ribosome						2.97394e-09				YGL103W, YOL127W, YLR029C, YGL147C, YDL075W, YNL002C, YPL143W, YPL249C-A, YIL133C
	GO:0004004	ATP-dependent RNA helicase activity						6.57369e-05				YLR276C, YLL008W, YDL031W
Group 114 Density 0					P-value 1.51838728038249E-11
members	partners
YAL033W	YNL282W
YBL018C	YNL282W
YHR062C	YNL282W
YNL221C	YNL282W
	GOID	Term						P-value				The genes annotated to this term
BP	GO:0031070	intronic snoRNA processing						1.51839e-11				YHR062C, YAL033W, YNL221C, YBL018C
CC	GO:0005655	nucleolar ribonuclease P complex						1.51839e-11				YHR062C, YAL033W, YNL221C, YBL018C
	GO:0030681	multimeric ribonuclease P complex						1.51838728038249e-11				YHR062C, YAL033W, YNL221C, YBL018C
MF	GO:0000171	ribonuclease MRP activity						2.38574e-11				YHR062C, YAL033W, YNL221C, YBL018C
Group 122 Density 0					P-value 0.0000440804490015938
members	partners
YDL113C	YJL036W
YDR425W	YJL036W YNL243W
YOR181W	YBL007C YFR024C-A YGL206C YGR167W YNL084C YNL243W YPL106C
	GOID	Term						P-value				The genes annotated to this term
BP	GO:0042147	retrograde transport, endosome to Golgi						6.38831815803671e-05				YDR425W, YDL113C
CC	GO:0010008	endosome membrane						0.000496982				YDR425W, YDL113C
MF	GO:0032266	phosphatidylinositol-3-phosphate binding						4.40804e-05				YDR425W, YDL113C
Group 126 Density 9.523810e-02					P-value 0.000010294063124437
members	partners
YAL003W	YKL081W YPL048W YPR080W
YDL167C	YPR080W
YDR314C	YPL048W
YGR175C	YHR020W YMR186W YNL272C YPR080W
YKL125W	YML126C YPR080W
YLL001W	YML085C YPR080W
YPL048W	YAL003W YDR314C YKL101W YPR080W
	GOID	Term						P-value				The genes annotated to this term
BP	No terms were found for this aspect with a corrected P-value <= 0.05
CC	GO:0005853	eukaryotic translation elongation factor 1 complex						1.02941e-05				YPL048W, YAL003W
MF	GO:0003746	translation elongation factor activity						0.00012282				YPL048W, YAL003W
Group 129 Density 0					P-value 3.73242320969873e-06
members	partners
YDL002C	YBR009C YDR190C YER092W YFL013C YFL039C YGL133W YGL150C YJL081C YKR001C YLR052W YLR357W YNL059C YOR141C YOR304W YPL235W
YDR121W	YAR007C YER165W YGL133W YLR432W YNL262W YOR304W YPR175W
YER164W	YBR009C YBR245C YDR190C YGL019W YIL035C YKR001C YOR039W YOR061W YOR304W
	GOID	Term						P-value				The genes annotated to this term
BP	GO:0042766	nucleosome mobilization						6.62245e-06				YDL002C, YER164W
CC	GO:0016585	chromatin remodeling complex						7.69509e-06				YDL002C, YDR121W, YER164W
MF	GO:0043566	structure-specific DNA binding						3.73242320969873e-06				YDL002C, YDR121W, YER164W
Group 132 Density 6.666667e-02					P-value 3.50513444336662E-08
members	partners
YBL058W	YDL126C
YBR170C	YDL126C YGR048W
YDR028C	YBR126C YDL126C YDR477W YER133W YGL115W
YDR049W	YDL126C
YGR048W	YBR170C YDL126C
YNL271C	YDL055C YDL126C YGR165W YML072C
	GOID	Term						P-value				The genes annotated to this term
BP	GO:0030433	ER-associated protein catabolic process						3.50513e-08				YBL058W, YGR048W, YBR170C, YDR049W
	GO:0051788	response to misfolded protein						2.05688e-05				YGR048W, YBR170C
	GO:0035967	cellular response to topologically incorrect protein						0.000201397				YGR048W, YBR170C
CC	GO:0034098	Cdc48p-Npl4p-Ufd1p AAA ATPase complex						2.20840810505559e-06				YGR048W, YBR170C
MF	GO:0031593	polyubiquitin binding						2.20840810505559e-06				YGR048W, YBR170C
	GO:0008599	protein phosphatase type 1 regulator activity						4.03523e-05				YBL058W, YDR028C
Group 133 Density 0					P-value 4.41820115378102e-07
members	partners
YFR044C	YDR170C
YLR035C	YLL024C YMR167W YOR261C
YNL082W	YLL024C YMR167W
	GOID	Term						P-value				The genes annotated to this term
BP	GO:0006298	mismatch repair						5.55239e-05				YNL082W, YLR035C
	GO:0007131	reciprocal meiotic recombination						0.000179524				YNL082W, YLR035C
CC	GO:0032389	MutLalpha complex						4.41820115378102e-07				YNL082W, YLR035C
	GO:0032300	mismatch repair complex						5.29852e-06				YNL082W, YLR035C
MF	GO:0030983	mismatched DNA binding						8.09326461287759e-06				YNL082W, YLR035C
Group 136 Density 0					P-value 0.00151472120927297
members	partners
YCR009C	YAL005C YDL044C YDR388W YNL209W
YLR139C	YDL044C
YMR083W	YDL044C YMR080C
	GOID	Term						P-value				The genes annotated to this term
BP	GO:0015980	energy derivation by oxidation of organic compounds						0.00151472				YMR083W, YLR139C
CC	No terms were found for this aspect with a corrected P-value <= 0.05
MF	No terms were found for this aspect with a corrected P-value <= 0.05
Group 137 Density 0					P-value 2.3071541507984e-09
members	partners
YDR028C	YBR126C YDL126C YDR477W YER133W YGL115W
YDR422C	YDR477W YGL115W
YER027C	YDR477W YGL115W
YER129W	YDR477W YGL115W
YGL208W	YDR477W YGL115W
	GOID	Term						P-value				The genes annotated to this term
BP	GO:0006468	protein phosphorylation						1.29090571916155e-06				YDR422C, YER027C, YER129W, YGL208W
	GO:0043254	regulation of protein complex assembly						3.95020890029648e-06				YDR422C, YER027C, YGL208W
	GO:0042149	cellular response to glucose starvation						1.76359e-05				YGL208W, YDR028C
CC	GO:0031588	AMP-activated protein kinase complex						2.3071541507984e-09				YDR422C, YER027C, YGL208W
MF	GO:0004679	AMP-activated protein kinase activity						2.30715e-09				YDR422C, YER027C, YGL208W
	GO:0016772	transferase activity, transferring phosphorus-containing groups						5.24748e-05				YDR422C, YER027C, YER129W, YGL208W
Group 142 Density 0					P-value 1.78274365323408e-31
members	partners
YBL072C	YBL032W YBR009C YBR079C YBR247C YCL059C YCR057C YDL148C YDL213C YDR429C YDR449C YER007C-A YGL120C YGR081C YGR090W YGR214W YHL034C YHR169W YHR196W YIL161W YJL124C YKL067W YLR192C YML056C YMR229C YMR309C YNL055C YNL207W YNL308C YOL010W YOL123W YOL139C YOR056C YOR078W YOR310C YOR361C YPL012W YPL204W YPR144C
YBR189W	YBR009C YBR247C YCR057C YDL060W YGL120C YGR081C YGR214W YHR196W YLR432W YNL132W YNL308C YOL139C YOR056C YOR310C YPL204W YPR041W YPR189W
YDR025W	YBL007C YBL032W YBR009C YBR247C YCR057C YDL060W YDL148C YDL213C YDR228C YDR365C YDR429C YER025W YER110C YGL120C YGR090W YGR214W YGR285C YHR086W YHR169W YHR196W YMR061W YMR309C YNL132W YNL207W YNL224C YNL308C YOL010W YOL123W YOR056C YPL204W YPR041W
YDR064W	YBR017C YBR079C YBR247C YCR057C YDL060W YGR090W YGR162W YGR285C YHR064C YHR196W YJL109C YKL067W YKL139W YNL132W YNL207W YNL308C YOR056C YOR310C YOR361C YPR137W YPR144C YPR189W
YDR447C	YBR247C YBR253W YCR057C YDL060W YDL126C YGL246C YGR128C YGR214W YHR064C YJL109C YKL067W YNL132W YOR056C YOR310C YPL204W YPR144C YPR189W
YIL069C	YAL016W YBL032W YBR142W YBR247C YCR057C YDL055C YDL060W YDL148C YDL195W YDR060W YGL171W YGR081C YGR090W YGR128C YHL034C YHR169W YIL125W YKL067W YLR175W YML126C YMR061W YOL123W YOR056C YPL204W YPR080W
YJL190C	YAL035W YCR057C YDL060W YDR429C YGL120C YGR090W YGR162W YHL034C YHR064C YHR169W YIL161W YJL109C YML126C YMR125W YMR205C YMR309C YOR361C YPL204W YPR189W
YJR123W	YAL034C YAL035W YBL039C YBL087C YBR049C YCR057C YDL060W YDL171C YDR429C YER110C YGL234W YGR090W YGR285C YHR019C YHR064C YHR196W YIL094C YJL080C YMR093W YNL055C YNL308C YOR361C YPR041W YPR137W YPR189W
YJR145C	YAL035W YAR042W YBL003C YBL032W YBR009C YBR049C YBR079C YBR115C YBR143C YBR247C YCL011C YCL059C YCR057C YDL060W YDL148C YDL213C YDR224C YER007C-A YER036C YGL120C YGR081C YGR090W YGR162W YGR285C YHL034C YHR064C YHR196W YJL033W YJL080C YJL109C YLR175W YLR432W YML056C YML062C YMR229C YNL004W YNL055C YNL132W YNL207W YNL308C YOL010W YOL120C YOL139C YOR056C YOR310C YPL012W YPL082C YPL204W YPR041W YPR13…
YLR367W	YAL035W YBR142W YBR247C YCR057C YDR060W YDR091C YDR429C YER025W YFR031C-A YHL034C YIL161W YKL067W YLR196W YLR432W YNL132W YNL175C YNL207W YOL139C YOR056C YOR310C
YML024W	YAL016W YBL032W YBR247C YCR057C YDL060W YDL148C YDR091C YDR174W YDR429C YGL190C YGR090W YHR169W YLR175W YML072C YMR309C YNL207W YPL012W
YML063W	YAL016W YAL034C YBR084W YBR247C YCR057C YDL060W YDR091C YDR429C YER007C-A YER025W YER110C YGL171W YGL190C YGL195W YGR090W YIL125W YMR309C YOL120C YPL012W YPR112C
YNL178W	YAL035W YBL003C YBR009C YBR049C YBR247C YCL059C YCR057C YER007C-A YER036C YFR031C-A YGL195W YGL234W YGR274C YGR285C YHR064C YHR169W YKL067W YLR153C YNL132W YNL308C YOL120C YOR056C YOR185C YPL082C YPL204W YPR041W YPR112C
YOR096W	YAR042W YBR079C YBR143C YCL059C YCR057C YDL060W YDL148C YDL213C YDR091C YDR429C YGL120C YGR090W YGR285C YHR064C YHR196W YJL033W YMR309C YNL132W YOR056C YOR310C YPR041W YPR144C
YPL081W	YBR009C YBR079C YCR057C YGL120C YHL034C YKL139W YMR309C YNL132W YNL207W YOL123W YPL204W YPR144C
	GOID	Term						P-value				The genes annotated to this term
BP	GO:0002181	cytoplasmic translation						9.99348e-22				YJR145C, YDR025W, YPL081W, YJL190C, YDR064W, YNL178W, YML024W, YLR367W, YML063W, YDR447C, YBL072C, YJR123W, YOR096W, YIL069C
	GO:0042274	ribosomal small subunit biogenesis						1.59621e-14				YDR025W, YPL081W, YBR189W, YDR064W, YML024W, YDR447C, YML063W, YBL072C, YOR096W, YIL069C
	GO:0006364	rRNA processing						1.56925706992408e-07				YDR025W, YPL081W, YML063W, YBR189W, YDR064W, YBL072C, YOR096W, YIL069C
CC	GO:0022627	cytosolic small ribosomal subunit						1.78274365323408e-31				YJR145C, YDR025W, YPL081W, YBR189W, YJL190C, YDR064W, YNL178W, YML024W, YLR367W, YML063W, YDR447C, YBL072C, YJR123W, YOR096W, YIL069C
	GO:0030686	90S preribosome						5.92783e-16				YJR145C, YDR025W, YPL081W, YML063W, YBR189W, YJR123W, YDR064W, YBL072C, YNL178W, YOR096W
	GO:0043228	non-membrane-bounded organelle						3.38612082223672e-11				YJR145C, YDR025W, YPL081W, YBR189W, YJL190C, YDR064W, YNL178W, YML024W, YLR367W, YML063W, YDR447C, YBL072C, YJR123W, YOR096W, YIL069C
MF	GO:0003735	structural constituent of ribosome						1.24858e-22				YJR145C, YDR025W, YPL081W, YBR189W, YJL190C, YDR064W, YNL178W, YML024W, YLR367W, YML063W, YDR447C, YBL072C, YJR123W, YOR096W, YIL069C
	GO:0019843	rRNA binding						0.00210482				YPL081W, YBR189W, YDR064W
Group 143 Density 0					P-value 0.000061492667355772
members	partners
YBR177C	YMR109W
YDL019C	YER120W YMR109W
YDR150W	YER120W
YGR086C	YER120W YKL142W
YHL020C	YER120W
	GOID	Term						P-value				The genes annotated to this term
BP	No terms were found for this aspect with a corrected P-value <= 0.05
CC	GO:0005938	cell cortex						0.000135526				YGR086C, YDL019C, YDR150W
	GO:0005811	lipid particle						0.000417443				YBR177C, YGR086C
MF	GO:0008289	lipid binding						6.14927e-05				YGR086C, YDL019C, YDR150W
	GO:0005543	phospholipid binding						0.00254652				YDL019C, YDR150W
Group 144 Density 6.666667e-02					P-value 3.69755344361294E-07
members	partners
YCR030C	YBL007C YBL047C YGR220C
YDR348C	YBL047C
YFR024C-A	YBL007C YNL243W YOR181W
YHR114W	YBL007C
YJL201W	YBL007C
YNL243W	YBL047C YDR425W YFR024C-A YKL182W YOR181W
	GOID	Term						P-value				The genes annotated to this term
BP	GO:0030036	actin cytoskeleton organization						7.65314e-05				YNL243W, YCR030C, YHR114W
	GO:0030029	actin filament-based process						9.08035e-05				YNL243W, YCR030C, YHR114W
CC	GO:0030427	site of polarized growth						3.69755e-07				YNL243W, YDR348C, YFR024C-A, YCR030C, YHR114W
	GO:0043332	mating projection tip						1.01156e-06				YNL243W, YDR348C, YCR030C, YHR114W
	GO:0030479	actin cortical patch						0.00110877				YNL243W, YHR114W
MF	GO:0003674	molecular_function						0.0138554				YNL243W, YJL201W, YDR348C, YFR024C-A, YCR030C, YHR114W
Group 151 Density 0					P-value 1.99998793109379e-05
members	partners
YDR140W	YNR046W
YNR050C	YAL005C YJL034W YNR046W YOR164C YOR270C
YOL124C	YNR046W
	GOID	Term						P-value				The genes annotated to this term
BP	GO:0043414	macromolecule methylation						0.000810756				YDR140W, YOL124C
CC	GO:0034708	methyltransferase complex						1.99998793109379e-05				YDR140W, YOL124C
MF	GO:0008757	S-adenosylmethionine-dependent methyltransferase activity						0.00042759				YDR140W, YOL124C
Group 152 Density 5.291005e-03					P-value 5.57077693108302E-55
members	partners
YBR122C	YDR296W YGR220C YML025C YNL284C
YBR282W	YCR046C YML025C YNL284C
YCL014W	YBL038W YGR220C
YCR071C	YCR046C YDR296W YGR220C YNL284C
YDR116C	YCR046C YDR296W YGR220C YJL041W YML025C YNL284C
YDR237W	YBL038W YCR046C YDR296W YDR462W YGR220C YHL034C YML025C YNL284C
YDR322W	YBL038W YCR046C YDR296W YDR462W YGR091W YGR220C YJL041W YML025C YNL284C
YDR405W	YGR220C YML025C
YDR462W	YBL038W YCR046C YDR237W YDR296W YDR322W YGR091W YGR220C YHL034C YNL284C
YHR147C	YGR220C YML025C YNL284C
YJL063C	YBL038W YCR046C YDR296W YGR091W YGR220C YJL041W YML025C
YKL167C	YCR046C YDR296W YGR220C YML025C
YKR006C	YCR046C YDR296W YGR220C YML025C
YKR085C	YBL038W YCR046C YDR296W YGR220C YML025C
YLR189C	YBL038W YGR220C
YLR312W-A	YCR046C YDR296W YGR220C YJL041W
YLR439W	YBL038W YCR046C YDR296W YGR091W YGR220C YML025C YNL284C
YML009C	YGR220C YNL284C
YMR024W	YBL038W YBL039C YCR046C YDL047W YDR296W YGR091W YJL041W YML025C YNL284C
YMR098C	YCR046C YGR220C
YMR193W	YCR046C YGR220C YJL041W YML025C YNL284C
YMR225C	YGR220C YNL284C
YNL005C	YBL032W YBL038W YCR046C YDR296W YGR091W YGR162W YGR220C YML025C YNL284C
YNL177C	YBL045C YBR208C YCR046C YDR296W YDR300C YML025C YNR016C YPR191W
YNL252C	YCR046C YDR296W YGR220C YML025C YNL284C
YOR150W	YBL038W YDR172W YDR296W YGR220C YNL284C
YPL183W-A	YDR296W YGR220C
YPR100W	YBL038W YDR296W
	GOID	Term						P-value				The genes annotated to this term
BP	GO:0032543	mitochondrial translation						1.59440347869943e-41				YJL063C, YLR439W, YKR085C, YKR006C, YBR122C, YDR405W, YDR462W, YDR237W, YHR147C, YNL005C, YNL252C, YCR071C, YML009C, YOR150W, YDR116C, YDR322W, YNL177C, YMR024W, YPL183W-A, YMR225C, YKL167C, YPR100W, YMR193W, YBR282W, YLR312W-A
	GO:0007005	mitochondrion organization						3.97287e-32				YJL063C, YMR098C, YLR439W, YKR085C, YKR006C, YBR122C, YDR405W, YDR462W, YDR237W, YHR147C, YNL005C, YNL252C, YCR071C, YML009C, YOR150W, YDR116C, YDR322W, YNL177C, YMR024W, YPL183W-A, YMR225C, YKL167C, YPR100W, YMR193W, YBR282W, YLR312W-A
	GO:0034645	cellular macromolecule biosynthetic process						1.826554436762e-13				YJL063C, YLR439W, YKR085C, YKR006C, YBR122C, YDR405W, YDR462W, YDR237W, YHR147C, YNL005C, YNL252C, YCR071C, YML009C, YOR150W, YDR116C, YDR322W, YNL177C, YMR024W, YPL183W-A, YMR225C, YKL167C, YPR100W, YMR193W, YBR282W, YLR312W-A
CC	GO:0000315	organellar large ribosomal subunit						5.57078e-55				YJL063C, YLR439W, YKR085C, YKR006C, YBR122C, YDR405W, YDR462W, YDR237W, YHR147C, YNL005C, YNL252C, YCR071C, YML009C, YOR150W, YDR116C, YDR322W, YNL177C, YMR024W, YPL183W-A, YMR225C, YKL167C, YPR100W, YMR193W, YBR282W, YLR312W-A
	GO:0005762	mitochondrial large ribosomal subunit						5.57078e-55				YJL063C, YLR439W, YKR085C, YKR006C, YBR122C, YDR405W, YDR462W, YDR237W, YHR147C, YNL005C, YNL252C, YCR071C, YML009C, YOR150W, YDR116C, YDR322W, YNL177C, YMR024W, YPL183W-A, YMR225C, YKL167C, YPR100W, YMR193W, YBR282W, YLR312W-A
MF	GO:0003735	structural constituent of ribosome						5.30662e-34				YJL063C, YLR439W, YKR085C, YKR006C, YBR122C, YDR405W, YDR462W, YDR237W, YHR147C, YNL005C, YNL252C, YCR071C, YML009C, YOR150W, YDR116C, YDR322W, YNL177C, YMR024W, YPL183W-A, YMR225C, YKL167C, YPR100W, YMR193W, YBR282W, YLR312W-A
	GO:0004525	ribonuclease III activity						5.55239e-05				YMR024W, YLR312W-A
Group 153 Density 6.666667e-02					P-value 2.86164545988913e-05
members	partners
YDL058W	YBL035C YBR009C YBR143C
YDR300C	YBR009C YNL177C
YEL056W	YBR009C YLL022C YPL001W
YFR006W	YBR009C
YGR170W	YBR009C YBR251W
YLL022C	YBR009C YEL056W YPL001W
YMR176W	YBR009C
YOL054W	YBR009C
YOR303W	YBR009C YJR109C
YPL001W	YBR009C YEL056W YLL022C
	GOID	Term						P-value				The genes annotated to this term
BP	GO:0016573	histone acetylation						3.30744e-05				YPL001W, YLL022C, YEL056W
	GO:0006348	chromatin silencing at telomere						6.96176e-05				YPL001W, YLL022C, YEL056W
	GO:0018205	peptidyl-lysine modification						8.59817e-05				YPL001W, YLL022C, YEL056W
CC	GO:0000123	histone acetyltransferase complex						3.79671e-05				YPL001W, YLL022C, YEL056W
	GO:0044451	nucleoplasm part						0.000444962				YPL001W, YLL022C, YEL056W, YMR176W
MF	GO:0042393	histone binding						2.86164545988913e-05				YPL001W, YLL022C, YEL056W
	GO:0004402	histone acetyltransferase activity						0.000759431				YPL001W, YEL056W
Group 154 Density 0					P-value 0.0000308466789573845
members	partners
YDL112W	YBL046W YJR045C YKL182W
YDR075W	YBL046W YGR192C YNL201C
YDR379W	YNL201C
YML010W	YBL046W YBR154C YDL140C YDR404C YGR005C YGR063C YIL021W YJL140W YNL201C YPR187W
	GOID	Term						P-value				The genes annotated to this term
BP	GO:2001020	regulation of response to DNA damage stimulus						3.08467e-05				YML010W, YDR075W
	GO:0080135	regulation of cellular response to stress						0.000102857				YML010W, YDR075W
CC	No terms were found for this aspect with a corrected P-value <= 0.05
MF	No terms were found for this aspect with a corrected P-value <= 0.05
Group 155 Density 0					P-value 0.0000405582602419977
members	partners
YMR197C	YDR264C YKL196C
YOR036W	YDR264C YKL196C
YOR212W	YDR264C
	GOID	Term						P-value				The genes annotated to this term
BP	GO:0006896	Golgi to vacuole transport						4.05583e-05				YOR036W, YMR197C
CC	GO:0005768	endosome						0.00143263				YOR036W, YMR197C
MF	GO:0005484	SNAP receptor activity						4.05582602419977e-05				YOR036W, YMR197C
Group 170 Density 9.523810e-02					P-value 0.000122820489965354
members	partners
YFR019W	YDL047W YOL135C
YGL197W	YDL047W YJL098W YLR310C YMR308C
YGR161C	YAL016W YDL047W YDL134C YGL190C YJL098W YKR027W
YKR028W	YDL047W YPL049C
YLR310C	YDL047W YGL197W YHR064C YJL098W
YOR267C	YDL047W YJL098W YLR249W
YPL049C	YBL017C YDL047W YJL098W YKR028W
	GOID	Term						P-value				The genes annotated to this term
BP	GO:0031929	TOR signaling cascade						0.00012282				YKR028W, YGL197W
	GO:0035556	intracellular signal transduction						0.00039931				YLR310C, YKR028W, YGL197W
CC	No terms were found for this aspect with a corrected P-value <= 0.05
MF	No terms were found for this aspect with a corrected P-value <= 0.05
Group 173 Density 0					P-value 0.00011845736076213
members	partners
YGR155W	YBR160W YIL109C YJL034W YJR045C YPL106C
YJR009C	YAL048C YDL188C YJL034W YKL010C YML056C YPL106C YPR080W
YML028W	YDL055C YJR093C YNL249C YPL106C
YOR014W	YAL016W YDL134C YDL188C YPL106C
	GOID	Term						P-value				The genes annotated to this term
BP	GO:0051726	regulation of cell cycle						0.000118457				YOR014W, YML028W, YGR155W
	GO:0000075	cell cycle checkpoint						0.000848485				YOR014W, YML028W
CC	No terms were found for this aspect with a corrected P-value <= 0.05
MF	GO:0048037	cofactor binding						0.00366927				YJR009C, YGR155W

## Sheet: Krogan
Krogan
Group 8 Density 0			P-value 1.51074272773519E-07
members	partners
YBR251W	YBR146W YDR041W YDR124W YDR175C YDR337W YDR347W YER050C YGL129C YGR165W YHL004W YIL093C YJR096W YJR101W YJR113C YKL155C YNL022C YNL137C YNL242W YNL306W YNR036C YOR158W YPL118W YPL240C
YGR215W	YER050C YIL070C YKL155C YMR188C YNR036C YOR158W
YNR037C	YKL155C YNR036C YOR158W
	GOID	Term	P-value	The genes annotated to this term
BP	GO:0032543	mitochondrial translation	6.48246e-06	YBR251W, YNR037C, YGR215W
	GO:0007005	mitochondrion organization	0.000134514	YBR251W, YNR037C, YGR215W
CC	GO:0000314	organellar small ribosomal subunit	1.51074e-07	YBR251W, YNR037C, YGR215W
	GO:0005763	mitochondrial small ribosomal subunit	1.51074e-07	YBR251W, YNR037C, YGR215W
MF	GO:0003735	structural constituent of ribosome	4.49986e-05	YBR251W, YNR037C, YGR215W
	GO:0005198	structural molecule activity	0.000196448	YBR251W, YNR037C, YGR215W
Group 9 Density 0			P-value 0.00165506245721854
members	partners
YBL071W-A	YAL020C YCR009C YDR385W YDR388W YEL037C YIL103W YKL191W YLR384C YLR429W
YBR108W	YCR009C YDR388W YGR086C YPL004C
YHR042W	YCR009C YDR388W YER171W
YLR218C	YCR009C YDR388W YGL134W YGR033C YLR429W
YML011C	YCR009C YDR385W YDR388W YEL037C YER162C YFR024C-A YGL106W YLR429W
YOL098C	YCR009C YDR388W YGL106W
YPL249C	YCR009C YDR388W YMR192W
	GOID	Term	P-value	The genes annotated to this term
BP	No terms were found for this aspect with a corrected P-value <= 0.05
CC	No terms were found for this aspect with a corrected P-value <= 0.05
MF	GO:0009055	electron carrier activity	0.00165506	YBL071W-A, YHR042W
	GO:0005506	iron ion binding	0.00171224	YBL071W-A, YHR042W
Group 14 Density 0			P-value 0.0011268190286545
members	partners
YCL031C	YGR090W YIL035C YNL186W
YDR227W	YDL042C YDR365C YIL075C YLR278C YLR442C YML041C YNL186W
YKL078W	YGR090W YGR251W YLR175W YNL186W YOL041C
	GOID	Term	P-value	The genes annotated to this term
BP	GO:0042274	ribosomal small subunit biogenesis	0.00112682	YKL078W, YCL031C
CC	GO:0031981	nuclear lumen	0.00221564	YDR227W, YKL078W, YCL031C
MF	No terms were found for this aspect with a corrected P-value <= 0.05
Group 17 Density 0			P-value 0.000272677534801684
members	partners
YGL009C	YGR171C YGR207C YGR250C YPL028W YPR175W
YGR281W	YGR250C
YML002W	YGR250C
YML051W	YGR250C
YOR018W	YGR207C YGR248W
	GOID	Term	P-value	The genes annotated to this term
BP	GO:0042493	response to drug	0.000272678	YGR281W, YOR018W
CC	No terms were found for this aspect with a corrected P-value <= 0.05
MF	No terms were found for this aspect with a corrected P-value <= 0.05
Group 18 Density 0			P-value 0.000461639582692618
members	partners
YMR072W	YBL002W YBL003C YBR009C YER116C YER164W YPL001W YPR161C
YNL088W	YBL002W YBL003C YBR049C YDR381W YER116C YGL207W YHR193C YIL035C YIL076W YLR455W YML069W YNL232W YOL021C
YOR058C	YBL003C YER116C YHR121W YLR150W YPL001W YPL146C
	GOID	Term	P-value	The genes annotated to this term
BP	GO:0071103	DNA conformation change	0.00046164	YNL088W, YMR072W
	GO:0007346	regulation of mitotic cell cycle	0.000750758	YNL088W, YOR058C
CC	No terms were found for this aspect with a corrected P-value <= 0.05
MF	No terms were found for this aspect with a corrected P-value <= 0.05
Group 19 Density 0			P-value 0.0000110282008552844
members	partners
YCL016C	YBR087W YHR191C YMR078C YPL023C
YLL013C	YER133W
YMR311C	YER133W
YNL233W	YER133W
YOR227W	YER133W
YPL137C	YER133W
	GOID	Term	P-value	The genes annotated to this term
BP	GO:0043666	regulation of phosphoprotein phosphatase activity	1.10282e-05	YMR311C, YPL137C
	GO:0007059	chromosome segregation	0.000246361	YMR311C, YPL137C, YCL016C
	GO:0000271	polysaccharide biosynthetic process	0.000565363	YNL233W, YMR311C
CC	No terms were found for this aspect with a corrected P-value <= 0.05
MF	GO:0019888	protein phosphatase regulator activity	0.000201397	YMR311C, YPL137C
Group 23 Density 0			P-value 1.47242595267478E-06
members	partners
YGL128C	YGL120C YLR424W
YKR022C	YCL047C YGL120C YHR165C YIL007C YLL062C YLR424W YML106W YPL160W
YOR064C	YBR009C YLL062C YLR455W
	GOID	Term	P-value	The genes annotated to this term
BP	GO:0000390	spliceosomal complex disassembly	1.47243e-06	YKR022C, YGL128C
	GO:0032988	ribonucleoprotein complex disassembly	3.09145e-06	YKR022C, YGL128C
CC	GO:0005684	U2-type spliceosomal complex	0.000201882	YKR022C, YGL128C
MF	No terms were found for this aspect with a corrected P-value <= 0.05
Group 25 Density 0			P-value 0.000905025053743733
members	partners
YDR028C	YER027C YER133W YER155C YER177W YHR052W YNL009W YNL220W YNR034W
YGR054W	YDR303C YGL173C YJL092W
YHL034C	YBL003C YDR381W YDR496C YGL173C YGR272C YHR193C YLR175W YNL255C YOL077C YOR310C YPR161C
	GOID	Term	P-value	The genes annotated to this term
BP	GO:0006417	regulation of translation	0.000905025	YHL034C, YGR054W
	GO:0010608	posttranscriptional regulation of gene expression	0.00123726	YHL034C, YGR054W
CC	No terms were found for this aspect with a corrected P-value <= 0.05
MF	No terms were found for this aspect with a corrected P-value <= 0.05
Group 28 Density 0			P-value 0.0000664575003515543
members	partners
YBR135W	YDL155W YDR099W YJL138C YLL050C YLR079W YLR109W YNL209W
YBR160W	YDL155W YLR079W YLR187W YLR210W YPR119W YPR120C
YIL020C	YJL080C YLR179C
YIL063C	YDR087C YDR304C YDR388W YER162C YGL245W YHR064C YIL035C YJL080C YKL054C YKR048C YMR309C YNL084C
YLL027W	YDR381W YDR388W YJL080C YKL040C YPL216W
	GOID	Term	P-value	The genes annotated to this term
BP	No terms were found for this aspect with a corrected P-value <= 0.05
CC	GO:0000307	cyclin-dependent protein kinase holoenzyme complex	6.64575e-05	YBR160W, YBR135W
MF	GO:0042393	histone binding	0.00039769	YBR160W, YBR135W
	GO:0008047	enzyme activator activity	0.00221861	YBR135W, YIL063C
Group 30 Density 0			P-value 0.000774143005878435
members	partners
YAL007C	YAR002C-A YBL003C YBR009C YDR086C YDR174W YDR381W YGL008C YGL055W YGL200C YGR231C YJL034W YLR075W YLR150W YLR342W YML012W YMR214W YNL055C
YGL167C	YAR010C YBL030C YBL071C YBR085W YBR189W YDR342C YER162C YGL008C YIL146C YLR075W YNL055C
YIL043C	YAR010C YBL003C YBR189W YDL014W YDR124W YDR381W YGL014W YGR032W YHL014C YJR094W-A YLR075W YLR150W YLR342W YLR432W YML072C YNL055C YOL006C YPL249C-A
	GOID	Term	P-value	The genes annotated to this term
BP	No terms were found for this aspect with a corrected P-value <= 0.05
CC	GO:0012505	endomembrane system	0.000774143	YGL167C, YIL043C, YAL007C
MF	No terms were found for this aspect with a corrected P-value <= 0.05
Group 39 Density 0			P-value 0.00047953441237232
members	partners
YBR176W	YPR080W
YDL236W	YPR080W
YJL021C	YJL020C
YKL025C	YGL094C YJL020C
YOL072W	YPR080W
	GOID	Term	P-value	The genes annotated to this term
BP	GO:0031124	mRNA 3'-end processing	0.000479534	YOL072W, YKL025C
CC	No terms were found for this aspect with a corrected P-value <= 0.05
MF	No terms were found for this aspect with a corrected P-value <= 0.05
Group 40 Density 0			P-value 0.0000924623022404058
members	partners
YBL081W	YPR173C
YLR025W	YKL041W YPR173C
YNL265C	YBL037W YPR173C
	GOID	Term	P-value	The genes annotated to this term
BP	GO:0045324	late endosome to vacuole transport	9.24623e-05	YLR025W, YNL265C
CC	GO:0005768	endosome	0.00143263	YLR025W, YNL265C
MF	No terms were found for this aspect with a corrected P-value <= 0.05
Group 46 Density 0			P-value 9.23078708906502E-10
members	partners
YBL008W	YBR215W YJL115W
YIL121W	YJL115W
YJR140C	YBR215W YJL115W YJL138C YMR031C
YLR403W	YJL115W
YOR038C	YBR215W YJL115W
	GOID	Term	P-value	The genes annotated to this term
BP	GO:0006336	DNA replication-independent nucleosome assembly	4.61322e-09	YBL008W, YJR140C, YOR038C
	GO:0034724	DNA replication-independent nucleosome organization	1.93619e-08	YBL008W, YJR140C, YOR038C
	GO:0006368	transcription elongation from RNA polymerase II promoter	4.75282e-06	YBL008W, YJR140C, YOR038C
CC	GO:0000417	HIR complex	9.23079e-10	YBL008W, YJR140C, YOR038C
	GO:0005678	chromatin assembly complex	2.76533e-08	YBL008W, YJR140C, YOR038C
MF	GO:0003714	transcription corepressor activity	2.62089e-07	YBL008W, YJR140C, YOR038C
	GO:0031491	nucleosome binding	3.53883e-07	YBL008W, YJR140C, YOR038C
Group 47 Density 0			P-value 0.0000790717366808509
members	partners
YBR059C	YER177W YIL148W YOL068C
YER016W	YER177W YOR294W
YFR017C	YER177W YPR184W
YGL181W	YER177W
YIR003W	YER071C YER177W
YLR256W	YER177W YOR362C
YMR086W	YER177W YGR086C YLR429W YMR031C YPL004C
YOR140W	YER177W YMR229C
YOR220W	YER177W
	GOID	Term	P-value	The genes annotated to this term
BP	GO:0048523	negative regulation of cellular process	0.000112247	YER016W, YFR017C, YOR140W, YGL181W, YLR256W
	GO:0043467	regulation of generation of precursor metabolites and energy	0.000440349	YFR017C, YLR256W
	GO:0006928	cellular component movement	0.000521389	YER016W, YIR003W
CC	GO:0044448	cell cortex part	0.000633934	YIR003W, YGL181W, YMR086W
MF	GO:0001133	sequence-specific transcription regulatory region DNA binding RNA polymerase II transcription factor recruiting transcription factor activity	7.90717e-05	YOR140W, YLR256W
	GO:0001134	transcription factor recruiting transcription factor activity	0.00121022	YOR140W, YLR256W
Group 53 Density 0			P-value 4.90962533520563E-07
members	partners
YBL030C	YGL167C
YBL071C	YFL002C YGL167C
YBR085W	YGL167C
YDR342C	YGL167C
YGL008C	YAL007C YBR159W YDL095W YGL167C YHR039C YJR010C-A
YIL146C	YGL167C
	GOID	Term	P-value	The genes annotated to this term
BP	GO:0009061	anaerobic respiration	4.90963e-07	YBR085W, YBL030C
	GO:0015886	heme transport	2.94393e-06	YBR085W, YBL030C
	GO:0051181	cofactor transport	8.35081e-05	YBR085W, YBL030C
CC	GO:0005739	mitochondrion	0.00018766	YBR085W, YBL030C, YGL008C, YIL146C, YDR342C
	GO:0016021	integral to membrane	0.000399332	YBR085W, YBL030C, YGL008C, YIL146C, YDR342C
	GO:0031224	intrinsic to membrane	0.000492256	YBR085W, YBL030C, YGL008C, YIL146C, YDR342C
MF	GO:0005471	ATP:ADP antiporter activity	2.94393e-06	YBR085W, YBL030C
	GO:0022857	transmembrane transporter activity	4.15844e-05	YBR085W, YBL030C, YGL008C, YDR342C
Group 60 Density 0			P-value 0.000237751307667856
members	partners
YBR001C	YBR109C YBR127C YDR001C YDR171W YGL106W
YBR130C	YAL029C YBR109C YGL106W YKL130C
YBR218C	YBR109C YGL062W YGL106W YJL092W YNL079C
YCR008W	YBR109C YCR009C YDL053C YDR129C YDR388W YER025W YGL106W YGR086C YKR081C YLR175W YLR197W YLR305C YLR429W YMR229C YNL106C YOR326W YPL004C YPR171W
YDR017C	YDR099W YGL106W YHR102W YMR196W YMR308C YOR326W
YDR457W	YAL029C YDR463W YGL106W YGR285C YHR064C YIL148W YLL021W YLR249W YMR186W YOL025W YOR326W
YGR188C	YDR388W YGL106W YMR304W YOR326W
YKL124W	YAL029C YGL106W YOR326W
YLR288C	YBR109C YGL106W YOR326W
YLR304C	YAL029C YBR109C YDR171W YGL106W YKL010C
YLR319C	YGL106W YOR304C-A YOR326W
YLR356W	YBR109C YGL106W YLR314C
YLR433C	YBR109C YKL190W
YMR071C	YBR109C YGL106W YOR326W
YNL023C	YDL014W YGL106W YIL161W YIR007W YOR326W
YOR127W	YBR109C YDR186C YGL106W YOR049C
YPL040C	YGL106W YOR326W
	GOID	Term	P-value	The genes annotated to this term
BP	No terms were found for this aspect with a corrected P-value <= 0.05
CC	GO:0030478	actin cap	0.000237751	YBR130C, YLR319C
MF	No terms were found for this aspect with a corrected P-value <= 0.05
Group 62 Density 0			P-value 0.0000564400719689964
members	partners
YAL012W	YKL210W YOL013C
YBL035C	YDR054C YKL210W YNL102W
YDR415C	YKL210W YNR051C
YGR204W	YBR084W YIL137C YKL210W
YHR082C	YKL210W YLR022C
YLR084C	YKL210W
YOR184W	YKL210W
	GOID	Term	P-value	The genes annotated to this term
BP	GO:0009113	purine base biosynthetic process	5.64401e-05	YGR204W, YOR184W
	GO:0046112	nucleobase biosynthetic process	0.000194059	YGR204W, YOR184W
	GO:0009070	serine family amino acid biosynthetic process	0.000281308	YAL012W, YOR184W
CC	No terms were found for this aspect with a corrected P-value <= 0.05
MF	GO:0030170	pyridoxal phosphate binding	0.000911259	YAL012W, YOR184W
	GO:0070279	vitamin B6 binding	0.000911259	YAL012W, YOR184W
Group 65 Density 0			P-value 1.47242595267478E-06
members	partners
YDL175C	YFR010W YJL050W YOL115W
YDR148C	YDR103W YIL125W YJL050W
YIL079C	YJL050W YOL115W
	GOID	Term	P-value	The genes annotated to this term
BP	GO:0016076	snRNA catabolic process	1.47243e-06	YDL175C, YIL079C
	GO:0016077	snoRNA catabolic process	1.47243e-06	YDL175C, YIL079C
	GO:0071039	nuclear polyadenylation-dependent CUT catabolic process	6.62245e-06	YDL175C, YIL079C
CC	GO:0031499	TRAMP complex	2.20841e-06	YDL175C, YIL079C
MF	GO:0004652	polynucleotide adenylyltransferase activity	1.47243e-06	YDL175C, YIL079C
Group 66 Density 0			P-value 0.0000284671988671279
members	partners
YAL028W	YMR186W
YBL004W	YJL124C YMR186W
YBL104C	YMR186W
YBR039W	YEL056W YGR250C YMR186W
YDL048C	YMR186W
YDR169C	YER090W YLR249W YMR186W YPR080W
YDR214W	YMR186W
YDR480W	YGL245W YMR186W
YDR510W	YMR186W
YEL070W	YMR186W
YER020W	YMR186W
YFR048W	YMR186W
YGR123C	YMR186W YOR014W YPL240C
YJR139C	YMR186W
YKR068C	YBR254C YDR407C YJL044C YMR186W
YLR024C	YDR051C YGL058W YMR186W
YNL281W	YDR139C YER062C YLR305C YMR186W
YNR022C	YMR186W YMR193W
YNR031C	YEL037C YLR006C YMR186W
YPL051W	YMR186W YOR361C YPR080W
YPR181C	YDR517W YMR186W YNL049C
	GOID	Term	P-value	The genes annotated to this term
BP	GO:0043085	positive regulation of catalytic activity	2.84672e-05	YDR214W, YNR031C, YER020W, YNL281W
	GO:0044093	positive regulation of molecular function	4.54815e-05	YDR214W, YNR031C, YER020W, YNL281W
	GO:0032781	positive regulation of ATPase activity	6.16159e-05	YDR214W, YNL281W
CC	No terms were found for this aspect with a corrected P-value <= 0.05
MF	GO:0001671	ATPase activator activity	0.000557016	YDR214W, YNL281W
	GO:0060589	nucleoside-triphosphatase regulator activity	0.000572896	YDR214W, YPR181C, YNL281W, YKR068C
Group 67 Density 0			P-value 0.0000555239154515156
members	partners
YDL239C	YBR221C
YNL071W	YBR221C YER178W
YOL076W	YPR131C
	GOID	Term	P-value	The genes annotated to this term
BP	GO:0000001	mitochondrion inheritance	5.55239e-05	YDL239C, YOL076W
	GO:0048311	mitochondrion distribution	5.55239e-05	YDL239C, YOL076W
	GO:0051646	mitochondrion localization	7.28262e-05	YDL239C, YOL076W
CC	No terms were found for this aspect with a corrected P-value <= 0.05
MF	GO:0016407	acetyltransferase activity	0.000276777	YNL071W, YOL076W
Group 85 Density 0			P-value 0.0017576956030123
members	partners
YGR271C-A	YMR014W
YIL150C	YDR174W YIL036W
YLR454W	YML058W YPL180W
YNL094W	YIL036W
	GOID	Term	P-value	The genes annotated to this term
BP	GO:0051329	interphase of mitotic cell cycle	0.0017577	YIL150C, YGR271C-A
CC	No terms were found for this aspect with a corrected P-value <= 0.05
MF	No terms were found for this aspect with a corrected P-value <= 0.05
Group 86 Density 0			P-value 4.90962533520563E-07
members	partners
YBL071W-A	YAL020C YCR009C YDR385W YDR388W YEL037C YIL103W YKL191W YLR384C YLR429W
YER001W	YIL103W YKL191W
YGR209C	YIL107C YKL191W YLL060C YLR039C
YJR045C	YBR079C YIL076W YKL191W YLR203C YOR081C YOR347C YPR161C
YLR043C	YDR272W YIL103W YJL033W YKL191W YLL060C YLR231C
	GOID	Term	P-value	The genes annotated to this term
BP	GO:0080058	protein deglutathionylation	4.90963e-07	YGR209C, YLR043C
	GO:0009263	deoxyribonucleotide biosynthetic process	1.76359e-05	YGR209C, YLR043C
	GO:0006662	glycerol ether metabolic process	3.81632e-05	YGR209C, YLR043C
CC	GO:0000139	Golgi membrane	8.57939e-05	YGR209C, YER001W, YLR043C
	GO:0044431	Golgi apparatus part	0.000204641	YGR209C, YER001W, YLR043C
MF	GO:0009055	electron carrier activity	7.03052e-06	YGR209C, YBL071W-A, YLR043C
	GO:0015035	protein disulfide oxidoreductase activity	6.64575e-05	YGR209C, YLR043C
Group 88 Density 0			P-value 3.54217168953185E-07
members	partners
YDR312W	YHR066W
YKL014C	YHR066W
YKL082C	YHR039C-B YHR066W
YNL122C	YER110C YHR066W
YPR143W	YDL145C YHR066W
	GOID	Term	P-value	The genes annotated to this term
BP	GO:0042273	ribosomal large subunit biogenesis	3.54217e-07	YPR143W, YKL082C, YKL014C, YDR312W
	GO:0000463	maturation of LSU-rRNA from tricistronic rRNA transcript (SSU-rRNA, 5.8S rRNA, LSU-rRNA)	0.00012504	YPR143W, YKL014C
CC	GO:0005730	nucleolus	0.000127666	YPR143W, YKL082C, YKL014C, YDR312W
	GO:0043228	non-membrane-bounded organelle	0.00164194	YPR143W, YKL082C, YKL014C, YDR312W, YNL122C
MF	No terms were found for this aspect with a corrected P-value <= 0.05
Group 90 Density 2.339181e-02			P-value 0.0000251416442887924
members	partners
YBL024W	YDL014W YDR381W YIL070C YLR150W
YDR283C	YDR174W YDR181C YDR381W YGR167W YKL101W YLL005C YLR150W YML010W YML057W YMR255W YNL047C YNR051C YPR052C
YER035W	YBR142W YDL148C YDR381W YEL015W YLR150W YNL308C
YER151C	YBR067C YDL147W YDR363W-A YGL106W YLR150W YMR173W YNR051C YOL109W
YFR030W	YDR304C YDR381W YDR388W YJL123C YOR361C
YGL122C	YBR017C YDR381W YGL049C YLR150W YMR255W
YGL166W	YDR381W
YGL200C	YAL007C YAR002C-A YDL014W YDL053C YDR174W YDR381W YFR015C YLR150W YML012W
YHR039C	YDL014W YDR174W YDR381W YER162C YGL008C YHR121W YLR150W YNR051C
YJR084W	YDR363W-A YDR381W YGR126W YLR150W YPR045C
YKL212W	YDR181C YDR381W YEL034W YHR216W YLR150W YMR083W YPL099C
YLR002C	YBR126C YDL168W YDR381W YLR150W YNL061W YOR206W YOR243C YOR294W
YLR333C	YDR381W YER131W YLR150W YML056C
YLR435W	YBL007C YBR044C YBR291C YDL060W YDR381W YER131W YGL014W YLR150W YNL207W YPL146C
YNR051C	YAR010C YCR028C-A YDR283C YDR381W YDR398W YDR415C YEL034W YER151C YHR039C YLR150W YMR229C YMR309C YNL061W YPR161C
YOL033W	YDR381W
YOL109W	YBR109C YER151C YIL103W YJL123C YMR173W
YOR359W	YLR150W
YPL150W	YLR150W
	GOID	Term	P-value	The genes annotated to this term
BP	GO:0034517	ribophagy	2.51416e-05	YER151C, YNR051C
	GO:0060628	regulation of ER to Golgi vesicle-mediated transport	0.00012504	YER151C, YNR051C
CC	No terms were found for this aspect with a corrected P-value <= 0.05
MF	GO:0003729	mRNA binding	0.00103497	YER035W, YER151C, YGL122C
Group 95 Density 0			P-value 2.30823946178025E-10
members	partners
YJR068W	YBR087W YOR144C YOR217W
YNL290W	YBL003C YBR087W YOR144C YOR217W
YOL094C	YOR144C YOR217W
	GOID	Term	P-value	The genes annotated to this term
BP	GO:0006272	leading strand elongation	8.40199e-09	YOL094C, YNL290W, YJR068W
	GO:0006298	mismatch repair	7.56179e-08	YOL094C, YNL290W, YJR068W
	GO:0007062	sister chromatid cohesion	4.80691e-07	YOL094C, YNL290W, YJR068W
CC	GO:0005663	DNA replication factor C complex	2.30824e-10	YOL094C, YNL290W, YJR068W
	GO:0031389	Rad17 RFC-like complex	2.30824e-10	YOL094C, YNL290W, YJR068W
MF	GO:0003689	DNA clamp loader activity	4.61648e-10	YOL094C, YNL290W, YJR068W
	GO:0033170	protein-DNA loading ATPase activity	4.61648e-10	YOL094C, YNL290W, YJR068W
Group 98 Density 0			P-value 1.76672652746988E-06
members	partners
YER018C	YDL073W YIL144W YMR117C
YOL069W	YIL144W YMR117C
YOR144C	YBR087W YJR068W YNL290W YOL094C
YOR217W	YBL003C YBR009C YBR087W YCR016W YDR174W YJR068W YNL290W YOL094C
	GOID	Term	P-value	The genes annotated to this term
BP	GO:0000278	mitotic cell cycle	4.91671e-06	YER018C, YOR217W, YOL069W, YOR144C
	GO:0007059	chromosome segregation	5.10295e-05	YER018C, YOL069W, YOR144C
	GO:0007020	microtubule nucleation	6.16159e-05	YER018C, YOL069W
CC	GO:0031262	Ndc80 complex	1.76673e-06	YER018C, YOL069W
	GO:0044427	chromosomal part	9.10023e-06	YER018C, YOR217W, YOL069W, YOR144C
	GO:0000778	condensed nuclear chromosome kinetochore	0.00034303	YER018C, YOL069W
MF	GO:0005200	structural constituent of cytoskeleton	0.000205533	YER018C, YOL069W
Group 99 Density 0			P-value 0.000209934153824478
members	partners
YBR140C	YML058W
YDR192C	YML058W
YDR396W	YML058W
YDR498C	YML058W
YFL037W	YGR155W YJL159W YML058W
YGL024W	YGR220C YML058W
YGR255C	YML058W YNL330C
YHR067W	YDR443C
YJL056C	YML058W
YKL037W	YML058W
YLR102C	YDR118W YML058W
YLR148W	YML058W YOR323C
YLR454W	YML058W YPL180W
YNL291C	YML058W
YNL310C	YML058W
YOR346W	YML058W
YPL115C	YML058W
YPR083W	YML058W
	GOID	Term	P-value	The genes annotated to this term
BP	GO:0046580	negative regulation of Ras protein signal transduction	0.000209934	YBR140C, YPL115C
	GO:0051058	negative regulation of small GTPase mediated signal transduction	0.000209934	YBR140C, YPL115C
CC	No terms were found for this aspect with a corrected P-value <= 0.05
MF	GO:0005099	Ras GTPase activator activity	0.00199369	YBR140C, YPL115C
Group 101 Density 0			P-value 0.000628714013461076
members	partners
YCR002C	YCR009C YDL225W YDR168W YDR507C YHR107C YJR076C YLR314C
YDR272W	YEL040W YLR043C YOR081C
YDR533C	YLR314C YMR322C
YIR022W	YDR507C YJR010C-A YLR314C YML012W
	GOID	Term	P-value	The genes annotated to this term
BP	No terms were found for this aspect with a corrected P-value <= 0.05
CC	No terms were found for this aspect with a corrected P-value <= 0.05
MF	GO:0016787	hydrolase activity	0.000628714	YIR022W, YDR272W, YCR002C, YDR533C
	GO:0070011	peptidase activity, acting on L-amino acid peptides	0.0037597	YIR022W, YDR533C
Group 103 Density 0			P-value 0.00197709019563534
members	partners
YLL062C	YKR022C YOR064C
YML106W	YDR058C YIL107C YKR022C YMR271C YPR052C
YPL031C	YDL145C YER059W YGR233C YLR190W YPL219W
	GOID	Term	P-value	The genes annotated to this term
BP	No terms were found for this aspect with a corrected P-value <= 0.05
CC	No terms were found for this aspect with a corrected P-value <= 0.05
MF	GO:0016740	transferase activity	0.00197709	YML106W, YPL031C, YLL062C
Group 104 Density 0			P-value 0.00155260911344459
members	partners
YGR198W	YBL093C YDR212W YDR449C YEL051W YLR222C YLR380W
YMR193W	YEL050C YGR220C YKR085C YNL232W YNL252C YNR022C YPL173W
YNR052C	YAL021C YDR212W YGR086C YHR193C
	GOID	Term	P-value	The genes annotated to this term
BP	No terms were found for this aspect with a corrected P-value <= 0.05
CC	GO:0030529	ribonucleoprotein complex	0.00155261	YNR052C, YGR198W, YMR193W
MF	No terms were found for this aspect with a corrected P-value <= 0.05
Group 105 Density 0			P-value 0.0011261127174297
members	partners
YBL079W	YGL106W YGR037C YLR429W
YBR223C	YGL082W YLR429W YPL181W
YDL017W	YLR429W
YDR032C	YLR429W
YDR212W	YGR198W YLR429W YNR052C
YDR314C	YDR388W YGL014W YHR029C YIL105C YLR429W
YEL001C	YGR126W YLR429W
YER048C	YLR429W
YIL039W	YDR388W YLR429W
YLR218C	YCR009C YDR388W YGL134W YGR033C YLR429W
YNL032W	YLR429W YNL099C
YNL073W	YIL062C YLR429W
YNL244C	YBR079C YDR388W YGR086C YLR429W YOR361C YPL144W
YOR145C	YLR429W
YPL218W	YLR429W
YPR093C	YDL140C YDR388W YIL062C YKL007W YLR429W YMR186W
	GOID	Term	P-value	The genes annotated to this term
BP	No terms were found for this aspect with a corrected P-value <= 0.05
CC	No terms were found for this aspect with a corrected P-value <= 0.05
MF	GO:0051082	unfolded protein binding	0.00112611	YOR145C, YER048C, YDR212W
Group 107 Density 0			P-value 0.00123726078511961
members	partners
YBL032W	YGL105W YGL245W YLR363W-A
YCL029C	YDR466W YER139C YGL245W YMR019W YMR134W
YLR259C	YBL016W YBR079C YER086W YIL076W YKL018W YLR085C YLR089C YLR320W YNL085W YPL247C
	GOID	Term	P-value	The genes annotated to this term
BP	GO:0010608	posttranscriptional regulation of gene expression	0.00123726	YBL032W, YLR259C
CC	No terms were found for this aspect with a corrected P-value <= 0.05
MF	No terms were found for this aspect with a corrected P-value <= 0.05
Group 116 Density 0			P-value 0.000910980924670265
members	partners
YIL177C	YPR034W
YJR069C	YBR127C
YML121W	YBR127C
YMR159C	YPR034W
YNL239W	YBR127C
YOR156C	YPR034W
YPR081C	YPR034W
	GOID	Term	P-value	The genes annotated to this term
BP	No terms were found for this aspect with a corrected P-value <= 0.05
CC	No terms were found for this aspect with a corrected P-value <= 0.05
MF	GO:0016874	ligase activity	0.000910981	YPR081C, YOR156C, YMR159C
Group 119 Density 0			P-value 0.00429069192851501
members	partners
YIL050W	YDR140W YER111C YGL050W
YJR031C	YBR155W YER050C YGL050W YJL197W YNL186W
YKL157W	YDL241W YER064C
	GOID	Term	P-value	The genes annotated to this term
BP	No terms were found for this aspect with a corrected P-value <= 0.05
CC	No terms were found for this aspect with a corrected P-value <= 0.05
MF	GO:0030234	enzyme regulator activity	0.00429069	YJR031C, YIL050W
Group 122 Density 0			P-value 0.000100506375635994
members	partners
YBR128C	YGL105W
YBR296C	YGL105W
YCR079W	YGL070C YLL022C YMR239C YOR323C
YDR270W	YGL105W
YIR033W	YGL105W
YKL050C	YGL105W
YLR138W	YGL105W
YLR247C	YGL105W
YNL119W	YGL105W
YOR017W	YGL105W
YOR049C	YMR239C YOR127W
YOR197W	YGL105W
	GOID	Term	P-value	The genes annotated to this term
BP	No terms were found for this aspect with a corrected P-value <= 0.05
CC	No terms were found for this aspect with a corrected P-value <= 0.05
MF	GO:0046873	metal ion transmembrane transporter activity	0.000100506	YDR270W, YLR138W, YBR296C
	GO:0015081	sodium ion transmembrane transporter activity	0.000115802	YLR138W, YBR296C
	GO:0022890	inorganic cation transmembrane transporter activity	0.00138495	YDR270W, YLR138W, YBR296C
Group 125 Density 0			P-value 0.00133318140713733
members	partners
YBR084W	YDL130W YGL207W YGR204W
YDR091C	YDL130W YJL005W YJR067C YLR150W YLR192C YNL260C
YDR251W	YDL130W YJL052W
	GOID	Term	P-value	The genes annotated to this term
BP	GO:0006163	purine nucleotide metabolic process	0.00133318	YBR084W, YDR091C
	GO:0072521	purine-containing compound metabolic process	0.00220194	YBR084W, YDR091C
CC	No terms were found for this aspect with a corrected P-value <= 0.05
MF	GO:0000166	nucleotide binding	0.00347863	YDR251W, YBR084W, YDR091C
Group 129 Density 0			P-value 1.68620053818154E-23
members	partners
YBR188C	YDR416W YLL036C YLR117C
YDR416W	YAL032C YBR139W YBR188C YDR074W YDR388W YGR129W YHR165C YIL068C YJR050W YLL036C YLR117C YLR147C YMR213W
YDR482C	YDL030W YDL043C YLL036C YLR117C YMR240C YPL151C
YGL174W	YDL043C YMR240C
YGR129W	YDL043C YDR416W YLR117C YLR249W
YGR278W	YKL173W YLL036C YLR117C YOR361C
YJL203W	YDL030W YDL043C YEL023C YLR011W YML049C YMR240C
YLR147C	YBR055C YBR119W YDL030W YDL043C YDL087C YDR240C YDR416W YER029C YER069W YER172C YFL018W-A YGR074W YGR091W YHR165C YJR022W YKL012W YKL095W YKL173W YLR275W YLR298C YLR325C YML046W YML049C YMR213W YMR240C YOR097C YOR159C YPR101W YPR182W
YMR288W	YBR010W YDL043C YML049C YMR240C YNL286W YPL213W
YOR319W	YML049C YMR240C
YPL151C	YAL032C YBR127C YDL043C YDR482C YLL036C YLR117C YMR213W YOR361C YPR134W
YPR101W	YLL036C YLR117C YLR147C YMR213W
YPR134W	YLL036C YPL151C
	GOID	Term	P-value	The genes annotated to this term
BP	GO:0000375	RNA splicing, via transesterification reactions	1.6862e-23	YPR134W, YPR101W, YGR278W, YOR319W, YJL203W, YBR188C, YMR288W, YGR129W, YDR482C, YGL174W, YLR147C, YPL151C, YDR416W
	GO:0000398	nuclear mRNA splicing, via spliceosome	4.24986e-21	YPR101W, YGR278W, YOR319W, YJL203W, YBR188C, YMR288W, YGR129W, YDR482C, YGL174W, YLR147C, YPL151C, YDR416W
CC	GO:0005681	spliceosomal complex	9.63121e-23	YPR101W, YGR278W, YOR319W, YJL203W, YBR188C, YMR288W, YGR129W, YDR482C, YGL174W, YLR147C, YPL151C, YDR416W
	GO:0005684	U2-type spliceosomal complex	1.78214e-19	YPR101W, YGR278W, YOR319W, YJL203W, YBR188C, YMR288W, YGR129W, YDR482C, YLR147C, YDR416W
	GO:0000974	Prp19 complex	3.6597e-12	YGR129W, YPR101W, YBR188C, YPL151C, YDR416W
MF	GO:0000384	first spliceosomal transesterification activity	5.07582e-09	YGR129W, YPR101W, YBR188C, YDR416W
	GO:0000386	second spliceosomal transesterification activity	0.00034371	YGR129W, YDR416W
Group 132 Density 0			P-value 0.00109113713201948
members	partners
YBL055C	YDR280W YOR052C
YJR125C	YDR280W
YOL142W	YBR025C YDR280W YGR095C YGR158C YHR069C YJR051W YOL021C YOR001W YOR076C
	GOID	Term	P-value	The genes annotated to this term
BP	GO:0090305	nucleic acid phosphodiester bond hydrolysis	0.00109114	YBL055C, YOL142W
CC	No terms were found for this aspect with a corrected P-value <= 0.05
MF	No terms were found for this aspect with a corrected P-value <= 0.05
Group 135 Density 0			P-value 0.000310368580399848
members	partners
YBR026C	YDR054C YIL148W
YBR059C	YER177W YIL148W YOL068C
YFL038C	YIL148W
YIL038C	YIL148W YJR032W
YKL080W	YIL148W
YKR001C	YIL148W
YNL084C	YDR369C YIL063C YIL148W YIR006C
YNL111C	YIL148W
YOR042W	YFR024C YIL148W YMR259C YMR276W
	GOID	Term	P-value	The genes annotated to this term
BP	GO:0030036	actin cytoskeleton organization	0.000310369	YKR001C, YBR059C, YNL084C
	GO:0030029	actin filament-based process	0.000367465	YKR001C, YBR059C, YNL084C
CC	No terms were found for this aspect with a corrected P-value <= 0.05
MF	No terms were found for this aspect with a corrected P-value <= 0.05
Group 136 Density 0			P-value 0.00018469088210027
members	partners
YER164W	YDL014W YGL019W YGL207W YIL035C YKR081C YLR175W YML069W YMR072W YMR229C YNL004W YOR039W YOR061W
YKL088W	YGL019W YIL035C YKR072C YOR054C YOR061W
YML102W	YBR195C YFL041W YLR150W YPR018W
YMR172W	YGL019W YOR039W YOR061W
YNL009W	YDR028C YLR178C YOL013C YOR089C
YNL220W	YDR028C YOR187W
	GOID	Term	P-value	The genes annotated to this term
BP	GO:0009651	response to salt stress	0.000184691	YKL088W, YMR172W
	GO:0006139	nucleobase-containing compound metabolic process	0.000496573	YNL220W, YNL009W, YKL088W, YMR172W, YML102W, YER164W
	GO:0031497	chromatin assembly	0.000623551	YML102W, YER164W
CC	No terms were found for this aspect with a corrected P-value <= 0.05
MF	GO:0042393	histone binding	0.000594107	YML102W, YER164W
	GO:0000287	magnesium ion binding	0.0009199	YNL220W, YNL009W
Group 139 Density 0			P-value 0.00115820014427827
members	partners
YBR073W	YKR072C
YJR131W	YKR072C
YKR056W	YKR072C
	GOID	Term	P-value	The genes annotated to this term
BP	GO:0006302	double-strand break repair	0.0011582	YKR056W, YBR073W
CC	No terms were found for this aspect with a corrected P-value <= 0.05
MF	No terms were found for this aspect with a corrected P-value <= 0.05
Group 144 Density 0			P-value 2.12497930042551E-06
members	partners
YAR002W	YER110C YLR335W YLR347C YNL189W
YDR289C	YBR127C YDL140C YGL246C YLR347C YNL189W YOR048C YOR151C
YGL232W	YLR347C YNL177C YNL189W YPL212C
YGR180C	YGL058W YJL026W YLR347C YNL189W YPL191C
YHR090C	YBL003C YDR359C YDR381W YEL018W YFL024C YGR002C YJL081C YLR150W YLR347C YNL107W YNL136W YNL189W YOR244W YPR023C
YJR041C	YDR381W YKL214C YLR347C YMR125W YNL189W YPL178W
YLR298C	YBR119W YDL087C YDR240C YER029C YGR013W YIL061C YKL012W YLR147C YLR275W YLR347C YML046W YMR125W YNL189W YOR159C
YLR335W	YAR002W YLR347C YNL189W
YML060W	YLR347C YNL189W
YNL139C	YCL011C YDR138W YDR381W YGL253W YHR167W YLR347C YML062C YNL004W YNL140C YNL189W YNL253W YOR191W
YOR124C	YER125W YFR010W YGR061C YLR347C YLR429W YNL189W YOR138C
YPL020C	YLR347C YMR308C YNL189W
YPL153C	YDR174W YJL115W YLR347C YNL189W
YPL178W	YJR041C YKL214C YLR347C YMR125W YNL189W
	GOID	Term	P-value	The genes annotated to this term
BP	GO:0090304	nucleic acid metabolic process	2.12498e-06	YNL139C, YJR041C, YPL178W, YDR289C, YAR002W, YGR180C, YML060W, YGL232W, YLR335W, YPL153C, YLR298C, YHR090C
	GO:0051028	mRNA transport	3.17802e-05	YPL178W, YNL139C, YAR002W, YLR335W
	GO:0051236	establishment of RNA localization	9.95092e-05	YPL178W, YNL139C, YAR002W, YLR335W
CC	GO:0005634	nucleus	1.1638e-05	YNL139C, YJR041C, YPL178W, YDR289C, YAR002W, YGR180C, YPL020C, YML060W, YGL232W, YLR335W, YPL153C, YLR298C, YHR090C
	GO:0005643	nuclear pore	0.000229235	YAR002W, YPL020C, YLR335W
MF	GO:0019783	small conjugating protein-specific protease activity	0.00100649	YPL020C, YOR124C
	GO:0008234	cysteine-type peptidase activity	0.00213421	YPL020C, YOR124C
Group 145 Density 0			P-value 0.00151495050696441
members	partners
YCL057W	YNL307C
YDR137W	YLR039C YMR146C YNL044W YNL209W YNL307C YPR080W
YDR379W	YER021W YKL172W YKR009C YNL307C
YJR036C	YNL307C
	GOID	Term	P-value	The genes annotated to this term
BP	No terms were found for this aspect with a corrected P-value <= 0.05
CC	No terms were found for this aspect with a corrected P-value <= 0.05
MF	GO:0030695	GTPase regulator activity	0.00151495	YDR379W, YDR137W
	GO:0060589	nucleoside-triphosphatase regulator activity	0.00208582	YDR379W, YDR137W
Group 148 Density 0			P-value 3.35645079860808E-08
members	partners
YBR279W	YAL036C YGL207W YGL244W YIL035C YLL063C YLR418C YLR430W YML069W YOL145C YOR040W YOR061W YOR123C YPL084W
YDR108W	YDL147W YDR363W-A YDR472W YFR010W YGL207W YIL078W YML069W YOR115C YPR078C
YDR225W	YBL003C YBL046W YDR075W YGL207W YGL241W YKR048C YML069W YNL201C
YER164W	YDL014W YGL019W YGL207W YIL035C YKR081C YLR175W YML069W YMR072W YMR229C YNL004W YOR039W YOR061W
YGL019W	YER164W YGL207W YGR063C YGR090W YIL035C YKL088W YMR172W YNL031C YOR039W YOR061W
YNL030W	YBL002W YBL003C YBR009C YDL156W YEL056W YGL207W YIL035C YJL115W YLL022C YML069W YNL031C YNL206C YOL054W YPL001W
YNL088W	YBL002W YBL003C YBR049C YDR381W YER116C YGL207W YHR193C YIL035C YIL076W YLR455W YML069W YNL232W YOL021C
YOL006C	YBR058C YBR245C YGL207W YIL043C YML058W YML069W YOR009W
YOL054W	YBL002W YBR009C YDR254W YGL207W YGR179C YIL035C YLR058C YNL030W YNL031C
YOL088C	YDR519W YGL207W YIL035C YPR117W
YOL145C	YBR279W YGL207W YGL244W YIL035C YLR418C YML069W YOR123C
YOR039W	YER164W YGL019W YGL207W YIL035C YML069W YMR172W YOR061W
YOR052C	YBL055C YBR079C YGL207W YIL035C YMR309C
YOR061W	YBL003C YBR079C YBR279W YER050C YER164W YGL019W YGL207W YHR013C YIL035C YJL115W YKL088W YKR072C YLR407W YLR418C YML069W YMR172W YNL031C YNL186W YOR039W
	GOID	Term	P-value	The genes annotated to this term
BP	GO:0006333	chromatin assembly or disassembly	1.88853e-07	YNL088W, YNL030W, YOL006C, YDR225W, YER164W
	GO:0006359	regulation of transcription from RNA polymerase III promoter	2.92552e-07	YOR039W, YOR061W, YGL019W
	GO:0071103	DNA conformation change	4.99653e-07	YNL088W, YNL030W, YOL006C, YDR225W, YER164W
CC	GO:0005956	protein kinase CK2 complex	3.35645e-08	YOR039W, YOR061W, YGL019W
	GO:0034456	UTP-C complex	1.67389e-07	YOR039W, YOR061W, YGL019W
	GO:0044427	chromosomal part	1.77374e-07	YBR279W, YOL054W, YNL088W, YNL030W, YOL006C, YDR225W, YOL145C, YER164W
MF	GO:0003918	DNA topoisomerase (ATP-hydrolyzing) activity	4.46776e-06	YNL088W, YOL006C
	GO:0030291	protein serine/threonine kinase inhibitor activity	0.000124159	YOR039W, YGL019W
	GO:0031490	chromatin DNA binding	0.000124159	YOL006C, YER164W
Group 151 Density 0			P-value 1.47288760056169E-07
members	partners
YBR057C	YLL040C
YJL130C	YHL004W YIR007W YJR109C YLR216C
YOR303W	YJR109C
	GOID	Term	P-value	The genes annotated to this term
BP	GO:0070408	carbamoyl phosphate metabolic process	1.47289e-07	YOR303W, YJL130C
	GO:0009065	glutamine family amino acid catabolic process	1.54443e-05	YOR303W, YJL130C
CC	No terms were found for this aspect with a corrected P-value <= 0.05
MF	GO:0004088	carbamoyl-phosphate synthase (glutamine-hydrolyzing) activity	4.4182e-07	YOR303W, YJL130C
	GO:0016884	carbon-nitrogen ligase activity, with glutamine as amido-N-donor	1.76488e-05	YOR303W, YJL130C
Group 155 Density 0			P-value 0.00221563880366548
members	partners
YBR049C	YBL003C YCR047C YDR490C YNL088W
YMR128W	YAL027W YCR047C YDL197C YDR381W YKR081C YNR046W YNR054C YOR206W YOR294W
YOL090W	YDR097C YHR143W-A YLR258W
	GOID	Term	P-value	The genes annotated to this term
BP	No terms were found for this aspect with a corrected P-value <= 0.05
CC	GO:0031981	nuclear lumen	0.00221564	YMR128W, YOL090W, YBR049C
MF	No terms were found for this aspect with a corrected P-value <= 0.05.
Group 163 Density 0			P-value 2.43865100250155E-06
members	partners
YDL156W	YBL002W YNL030W YPL220W YPR161C
YJL115W	YAR007C YBL008W YBR009C YBR010W YBR109C YBR215W YIL035C YIL121W YJR140C YLR403W YNL030W YNL031C YNL113W YOR038C YOR061W YPL153C
YLL022C	YBR009C YBR010W YCR079W YDL126C YDR388W YEL056W YER161C YGL229C YGR264C YIL148W YJL102W YJR154W YLR429W YMR233W YNL030W YNL031C YPL001W
YNL206C	YBR009C YBR010W YGL253W YNL030W YNL031C
YOL054W	YBL002W YBR009C YDR254W YGL207W YGR179C YIL035C YLR058C YNL030W YNL031C
	GOID	Term	P-value	The genes annotated to this term
BP	GO:0016458	gene silencing	3.98677e-05	YJL115W, YLL022C, YNL206C
	GO:0031497	chromatin assembly	2.62562e-06	YJL115W, YLL022C, YNL206C
	GO:0006335	DNA replication-dependent nucleosome assembly	4.90501e-06	YJL115W, YNL206C
CC	GO:0005694	chromosome	0.00209442	YNL206C, YOL054W, YDL156W
MF	GO:0042393	histone binding	2.43865e-06	YJL115W, YLL022C, YNL206C
	GO:0005515	protein binding	0.00874786	YJL115W, YLL022C, YNL206C
Group 165 Density 0			P-value 0.000233446267779239
members	partners
YBL052C	YBL003C YBR010W YJR082C YLR455W YPR031W
YCR087C-A	YAL051W YBL003C YBR010W YDL060W YDR398W YLL004W YML065W YPL022W
YDR052C	YBL003C YBR010W YDR388W YER021W
YDR463W	YBL003C YBR010W YDL140C YDR168W YDR457W
YMR284W	YBL003C YBR009C YBR010W YDR224C YGR052W YIR019C YMR106C
YNL167C	YBR010W
	GOID	Term	P-value	The genes annotated to this term
BP	GO:0048523	negative regulation of cellular process	0.000233446	YNL167C, YBL052C, YMR284W, YDR052C
	GO:0030466	chromatin silencing at silent mating-type cassette	0.00040765	YBL052C, YMR284W
CC	No terms were found for this aspect with a corrected P-value <= 0.05
MF	GO:0001077	RNA polymerase II core promoter proximal region sequence-specific DNA binding transcription factor activity involved in positive regulation of transcription	0.000849185	YNL167C, YDR463W
	GO:0001228	RNA polymerase II transcription regulatory region sequence-specific DNA binding transcription factor activity involved in positive regulation of transcription	0.000849185	YNL167C, YDR463W
Group 169 Density 0			P-value 0.0000114753201546676
members	partners
YIL108W	YGR207C YML105C YMR149W YNL254C
YLR131C	YDR087C YFR053C YMR308C YNL135C YNL254C
YNL068C	YNL254C YOR361C
	GOID	Term	P-value	The genes annotated to this term
BP	GO:0000114	regulation of transcription involved in G1 phase of mitotic cell cycle	1.14753e-05	YNL068C, YLR131C
CC	No terms were found for this aspect with a corrected P-value <= 0.05
MF	GO:0000981	sequence-specific DNA binding RNA polymerase II transcription factor activity	0.00143263	YNL068C, YLR131C
	GO:0001071	nucleic acid binding transcription factor activity	0.00278563	YNL068C, YLR131C
Group 172 Density 0			P-value 0.000707256874004
members	partners
YHL004W	YBR079C YBR251W YDR175C YDR347W YER025W YER050C YGL129C YIL070C YJL130C YJR060W YLR432W YNL137C YNR036C YOR158W YPR025C YPR080W
YJR109C	YJL130C YOR303W
YPL090C	YBL003C YDL060W YER030W YGL017W YKR048C YNL037C YPR025C
	GOID	Term	P-value	The genes annotated to this term
BP	No terms were found for this aspect with a corrected P-value <= 0.05
CC	GO:0015935	small ribosomal subunit	0.000707257	YHL004W, YPL090C
MF	GO:0003735	structural constituent of ribosome	0.00372154	YHL004W, YPL090C
	GO:0005198	structural molecule activity	0.00977091	YHL004W, YPL090C
Group 173 Density 0			P-value 0.000394834354614072
members	partners
YJL052W	YCL014W YDR172W YDR251W YEL023C YER086W YGR250C YJR009C YJR032W YKR042W YLL060C YLR135W YLR144C YLR320W YML091C YOL013C
YOR299W	YJR009C
YPL003W	YJR009C
	GOID	Term	P-value	The genes annotated to this term
BP	GO:0034637	cellular carbohydrate biosynthetic process	0.000394834	YJL052W, YOR299W
CC	No terms were found for this aspect with a corrected P-value <= 0.05
MF	No terms were found for this aspect with a corrected P-value <= 0.05
Group 176 Density 0			P-value 0.000174067303503224
members	partners
YHR216W	YAR073W YER050C YKL212W YLR432W YML056C
YKL054C	YDL143W YER050C YFR019W YHR041C YIL063C YJL180C YKL117W
YMR158W	YER050C YGR185C
YPL013C	YER050C
	GOID	Term	P-value	The genes annotated to this term
BP	GO:0032543	mitochondrial translation	0.00205178	YMR158W, YPL013C
CC	GO:0000314	organellar small ribosomal subunit	0.000174067	YMR158W, YPL013C
	GO:0005763	mitochondrial small ribosomal subunit	0.000174067	YMR158W, YPL013C
MF	GO:0003735	structural constituent of ribosome	0.00726785	YMR158W, YPL013C
Group 177 Density 0			P-value 0.0000440804490015938
members	partners
YAL026C	YAL019W YDL019C YDR054C YKL010C YML069W
YAR044W	YAR042W YBR079C YDL019C YDL040C YLR119W YML069W YOR361C YPR080W
YOR233W	YBR159W YKL010C YMR010W
	GOID	Term	P-value	The genes annotated to this term
BP	GO:0006869	lipid transport	0.000151743	YAL026C, YAR044W
	GO:0010876	lipid localization	0.000165343	YAL026C, YAR044W
	GO:0006897	endocytosis	0.000651254	YAL026C, YAR044W
CC	No terms were found for this aspect with a corrected P-value <= 0.05
MF	GO:0005319	lipid transporter activity	4.40804e-05	YAL026C, YAR044W
Group 178 Density 0			P-value 0.00175207031758577
members	partners
YBR001C	YBR109C YBR127C YDR001C YDR171W YGL106W
YJR148W	YDR171W YLR418C
YPR035W	YDR171W YLR048W YNL288W
	GOID	Term	P-value	The genes annotated to this term
BP	GO:0008652	cellular amino acid biosynthetic process	0.00175207	YPR035W, YJR148W
	GO:0009309	amine biosynthetic process	0.00184259	YPR035W, YJR148W
CC	No terms were found for this aspect with a corrected P-value <= 0.05
MF	No terms were found for this aspect with a corrected P-value <= 0.05
Group 179 Density 0			P-value 0.00168387092451067
members	partners
YAL001C	YBR123C YDL074C YDL078C YDL097C YDL147W YDR362C YDR381W YDR449C YDR523C YFR052W YGR047C YMR093W YOR110W
YAL019W	YAL026C YDL097C YDL147W YFR052W YIL035C YJR119C YLR027C
YAL042W	YDL097C YDL147W YFR052W
YDR055W	YDL147W
YGL095C	YDL097C YER021W YFR052W
YGL178W	YFR052W
YHR170W	YDL147W
YPL082C	YDL097C YFR052W
YPL242C	YDL147W
YPR003C	YDL147W
	GOID	Term	P-value	The genes annotated to this term
BP	No terms were found for this aspect with a corrected P-value <= 0.05
CC	No terms were found for this aspect with a corrected P-value <= 0.05
MF	GO:0005515	protein binding	0.00168387	YPL242C, YPL082C, YGL095C, YGL178W, YAL019W
Group 182 Density 0			P-value 0.00818850418881709
members	partners
YMR170C	YKL100C YLR143W YMR169C
YNL099C	YNL032W YNL056W YNR054C YOR294W
YPL207W	YLR380W YMR131C
	GOID	Term	P-value	The genes annotated to this term
BP	No terms were found for this aspect with a corrected P-value <= 0.05
CC	No terms were found for this aspect with a corrected P-value <= 0.05
MF	GO:0016491	oxidoreductase activity	0.0081885	YMR170C, YPL207W
Group 183 Density 0			P-value 0.0000799586386896825
members	partners
YBR148W	YER006W YHR121W YIL069C
YER069W	YHR121W YLR147C YPR046W
YGL067W	YDR381W YHR121W YKR037C YOR257W
YHL008C	YDR304C YDR388W YHR121W
YIL045W	YER062C YHR121W
YJL051W	YHR121W
YKL108W	YGL245W YGR155W YHR121W YIL070C
YLL032C	YHR121W
YLR032W	YDR087C YHR121W
YLR325C	YBL075C YHR121W YLR147C
YML032C	YER095W YHR121W
YPR007C	YCR095C YHR121W
YPR120C	YBR160W YDR155C YHR121W YLR079W
	GOID	Term	P-value	The genes annotated to this term
BP	GO:0006259	DNA metabolic process	0.000236236	YKL108W, YPR007C, YLR032W, YPR120C, YJL051W, YML032C
	GO:0071844	cellular component assembly at cellular level	0.0004241	YKL108W, YPR007C, YBR148W, YLR032W, YPR120C, YML032C
	GO:0006310	DNA recombination	0.000566609	YKL108W, YPR007C, YJL051W, YML032C
CC	No terms were found for this aspect with a corrected P-value <= 0.05
MF	GO:0000739	DNA strand annealing activity	7.99586e-05	YKL108W, YML032C
	GO:0043566	structure-specific DNA binding	0.000952132	YKL108W, YLR032W, YML032C
Group 185 Density 0			P-value 1.60509224656623E-08
members	partners
YAL012W	YKL210W YOL013C
YCL030C	YOL013C
YDL077C	YOL013C YOR051C
YDR127W	YOL013C
YER091C	YBL002W YLR347C YOL013C
YFR044C	YOL013C
YGR240C	YBR109C YMR205C YOL013C
YHR179W	YLL060C YMR201C YOL013C
YKL024C	YOL013C
YLR153C	YOL013C YPR074C
YOR335C	YDR322C-A YOL013C
YOR375C	YOL013C
YPR069C	YLR146C YOL013C
	GOID	Term	P-value	The genes annotated to this term
BP	GO:0006520	cellular amino acid metabolic process	1.60509e-08	YCL030C, YOR335C, YOR375C, YFR044C, YER091C, YAL012W, YDR127W, YPR069C
	GO:0008652	cellular amino acid biosynthetic process	2.88413e-07	YAL012W, YCL030C, YPR069C, YDR127W, YOR375C, YER091C
	GO:0006790	sulfur compound metabolic process	0.0008977	YAL012W, YFR044C, YER091C
CC	No terms were found for this aspect with a corrected P-value <= 0.05
MF	GO:0036094	small molecule binding	2.67903e-05	YCL030C, YOR335C, YOR375C, YAL012W, YGR240C, YDR127W, YLR153C, YKL024C, YHR179W
	GO:0003824	catalytic activity	5.60786e-05	YCL030C, YOR335C, YOR375C, YFR044C, YER091C, YAL012W, YGR240C, YPR069C, YDR127W, YLR153C, YKL024C, YHR179W
Group 188 Density 0			P-value 0.0371243536613773
members	partners
YDR470C	YML131W
YJL066C	YMR048W
YNL273W	YJR009C YMR048W YPR037C
YOL154W	YML131W YMR048W
YOR092W	YML131W
	GOID	Term	P-value	The genes annotated to this term
BP	No terms were found for this aspect with a corrected P-value <= 0.05
CC	No terms were found for this aspect with a corrected P-value <= 0.05
MF	GO:0003674	molecular_function	0.0371244	YDR470C, YJL066C, YNL273W, YOR092W, YOL154W
Group 189 Density 0			P-value 0.0000352459723013747
members	partners
YJR047C	YEL034W
YKL193C	YER133W YFR003C YML016C
YLR069C	YEL034W YGL068W
YOL059W	YBL003C YEL034W YGR285C YLR109W YLR150W
	GOID	Term	P-value	The genes annotated to this term
BP	No terms were found for this aspect with a corrected P-value <= 0.05
CC	No terms were found for this aspect with a corrected P-value <= 0.05
MF	GO:0003746	translation elongation factor activity	3.5246e-05	YJR047C, YLR069C
Group 192 Density 0			P-value 9.71090191004851E-06
members	partners
YBR289W	YMR228W YOR290C YPL016W
YFL049W	YJL176C YOR290C
YNL307C	YCL057W YDR137W YDR379W YGR012W YGR056W YJR036C YOR290C
	GOID	Term	P-value	The genes annotated to this term
BP	GO:0051276	chromosome organization	0.000287061	YFL049W, YNL307C, YBR289W
	GO:0006302	double-strand break repair	0.000584468	YNL307C, YBR289W
CC	GO:0016514	SWI/SNF complex	9.7109e-06	YFL049W, YBR289W
	GO:0016585	chromatin remodeling complex	0.00116307	YFL049W, YBR289W
MF	No terms were found for this aspect with a corrected P-value <= 0.05
Group 198 Density 0			P-value 0.0000152846538322873
members	partners
YAL007C	YAR002C-A YBL003C YBR009C YDR086C YDR174W YDR381W YGL008C YGL055W YGL200C YGR231C YJL034W YLR075W YLR150W YLR342W YML012W YMR214W YNL055C
YBR049C	YBL003C YCR047C YDR490C YNL088W
YBR060C	YBL002W YBL003C YBR009C YDR174W YHR118C YLL004W YML065W YNL261W YOR294W YPL001W YPR162C
YBR247C	YBL003C YBL075C YDR174W YDR346C YKL143W YNL055C YNR050C
YCR043C	YAL023C YBL002W YBL075C YBR009C YCR009C YDL053C YDL095W YDR174W YDR381W YDR388W YEL036C YLR429W YPL146C
YDL095W	YAR010C YBL002W YBL003C YBL075C YBR009C YBR171W YBR283C YCR043C YDL022W YDR129C YDR174W YDR388W YEL002C YGL008C YGL245W YGR266W YJL117W YJR009C YLR150W YLR429W YMR083W YNL055C YOR093C YOR153W YPL004C YPL226W
YDR044W	YAR010C YBL002W YBL003C YBL075C YBR009C YCL043C YDR174W YDR385W YEL030W YGR086C YGR087C YHR013C YOR093C YOR257W
YDR224C	YBL002W YBL003C YBR009C YGL207W YGL241W YKR048C YLR133W YML069W YMR284W YOL012C
YER116C	YBL003C YBR009C YCR009C YDL013W YDR174W YDR388W YLR150W YMR072W YNL088W YOR058C
YGL035C	YAR010C YBL002W YBL003C YBR010W YDR099W YDR174W
YGR275W	YBL002W YBR009C YCR020W-B YCR052W YDL179W YDR174W YFR037C YGR056W YIL126W YJL176C YKR008W YLR033W YLR321C YLR357W YMR033W YMR091C YOR290C YPL016W YPL129W YPR034W
YHR118C	YBL002W YBL003C YBR009C YBR060C YDR174W YDR381W YEL056W YHR121W YKR081C YLL004W YML065W YNL261W YOR294W YPL001W YPL127C YPR162C
YHR193C	YBL003C YDR174W YDR221W YDR381W YGR134W YHL034C YJR011C YKR081C YMR140W YNL088W YNL247W YNR052C YPL037C
YIL076W	YBL002W YBL003C YBR009C YBR283C YDL145C YDR174W YDR238C YER120W YFR051C YGL137W YJR045C YLR150W YLR259C YLR429W YNL055C YNL088W YNL287W YPL010W
YJL047C	YBL003C YBL060W YBR009C YBR010W YBR072W YDR054C YLR150W YPL216W
YLR022C	YAR010C YBL003C YCR016W YDR174W YDR293C YDR381W YHR082C YKL056C YLR150W YMR229C YNL163C YNL209W
YLR320W	YAR073W YBL002W YBL075C YBR009C YBR010W YDL014W YDR174W YJL052W YLR150W YLR197W YLR259C YLR432W YMR187C YNL055C YNL209W YOR198C
YLR385C	YAL011W YBL002W YBL003C YBR231C YDR174W YDR190C YDR334W YDR485C YGR002C YJL081C YLR085C YLR399C YML041C YNL107W YOL052C YPL235W
YLR455W	YBL002W YBL052C YDL014W YDR174W YDR381W YJR082C YKL172W YLR150W YLR196W YLR197W YMR229C YMR290C YNL088W YNL248C YOL077C YOR064C YOR206W YOR294W YOR310C
YML012W	YAL007C YBR009C YDR174W YDR381W YGL137W YGL200C YIR022W YLR197W YML055W YOL012C
YMR044W	YBL002W YBL003C YBR010W YBR245C YDR174W YLR095C
YMR072W	YBL002W YBL003C YBR009C YER116C YER164W YPL001W YPR161C
YOR217W	YBL003C YBR009C YBR087W YCR016W YDR174W YJR068W YNL290W YOL094C
	GOID	Term	P-value	The genes annotated to this term
BP	GO:0006261	DNA-dependent DNA replication	1.52847e-05	YBR060C, YHR118C, YOR217W, YLR320W, YJL047C
	GO:0090304	nucleic acid metabolic process	3.43936e-05	YHR118C, YOR217W, YMR072W, YGR275W, YJL047C, YER116C, YBR247C, YBR060C, YDR224C, YLR385C, YLR320W, YGL035C, YHR193C, YMR044W, YBR049C
	GO:0006355	regulation of transcription, DNA-dependent	0.000329958	YHR118C, YGR275W, YBR060C, YDR224C, YLR385C, YGL035C, YHR193C, YBR049C, YMR044W
CC	GO:0035361	Cul8-RING ubiquitin ligase complex	7.42015e-05	YLR320W, YJL047C
	GO:0005634	nucleus	0.00017035	YOR217W, YLR022C, YBR247C, YBR060C, YLR455W, YLR385C, YLR320W, YBR049C, YHR118C, YGR275W, YMR072W, YER116C, YJL047C, YDR224C, YGL035C, YHR193C, YMR044W
	GO:0000808	origin recognition complex	0.000184691	YBR060C, YHR118C
MF	GO:0003677	DNA binding	0.000654972	YDR224C, YBR060C, YHR118C, YOR217W, YMR072W, YGL035C, YMR044W, YBR049C
Group 199 Density 0			P-value 0.000363374020210888
members	partners
YJL035C	YLR275W
YNL177C	YDR381W YGL232W
YPL212C	YGL232W YPL195W
	GOID	Term	P-value	The genes annotated to this term
BP	GO:0006400	tRNA modification	0.000363374	YJL035C, YPL212C
	GO:0008033	tRNA processing	0.000888958	YJL035C, YPL212C
CC	No terms were found for this aspect with a corrected P-value <= 0.05
MF	No terms were found for this aspect with a corrected P-value <= 0.05
Group 201 Density 0			P-value 0.00389731671874039
members	partners
YCR053W	YAR073W YML126C YOL013C YOR209C
YGL097W	YLR293C YNL247W YPL037C
YHR204W	YCL043C YDL085W YNL312W
YKL093W	YDL085W YJL118W YLR273C
	GOID	Term	P-value	The genes annotated to this term
BP	GO:0010033	response to organic substance	0.00389732	YHR204W, YGL097W
CC	No terms were found for this aspect with a corrected P-value <= 0.05
MF	No terms were found for this aspect with a corrected P-value <= 0.05
Group 206 Density 0			P-value 7.16350177795907E-12
members	partners
YAL032C	YDL043C YDR416W YPL151C
YLL036C	YBR188C YDR416W YDR482C YGR278W YLR132C YPL151C YPR101W YPR134W
YLR117C	YBR188C YDR416W YDR482C YGR129W YGR278W YPL151C YPR101W
YMR213W	YDR416W YKL104C YLR147C YMR240C YOR159C YPL151C YPR101W
	GOID	Term	P-value	The genes annotated to this term
BP	GO:0000398	nuclear mRNA splicing, via spliceosome	8.05098e-08	YAL032C, YLR117C, YMR213W, YLL036C
	GO:0022618	ribonucleoprotein complex assembly	3.48496e-05	YAL032C, YLR117C, YLL036C
CC	GO:0071006	U2-type catalytic step 1 spliceosome	1.03473e-11	YAL032C, YLR117C, YMR213W, YLL036C
	GO:0000974	Prp19 complex	1.10704e-08	YLR117C, YMR213W, YLL036C
	GO:0005681	spliceosomal complex	2.40772e-08	YAL032C, YLR117C, YMR213W, YLL036C
MF	GO:0000384	first spliceosomal transesterification activity	7.1635e-12	YAL032C, YLR117C, YMR213W, YLL036C
	GO:0000386	second spliceosomal transesterification activity	2.67394e-05	YAL032C, YLR117C
Group 208 Density 0			P-value 0.00287041349092926
members	partners
YDR165W	YDL201W YFR053C
YGL253W	YFR053C YNL139C YNL206C YOL097C
YGR207C	YDR087C YGL009C YGL245W YIL108W YLR265C YNR058W YOR018W YPL217C
	GOID	Term	P-value	The genes annotated to this term
BP	GO:0006091	generation of precursor metabolites and energy	0.00287041	YGL253W, YGR207C
CC	No terms were found for this aspect with a corrected P-value <= 0.05
MF	No terms were found for this aspect with a corrected P-value <= 0.05
Group 209 Density 0			P-value 0.000521261177169607
members	partners
YKR049C	YBR058C YDR157W
YOL006C	YBR058C YBR245C YGL207W YIL043C YML058W YML069W YOR009W
YPL085W	YBR058C YIL051C YPL227C
	GOID	Term	P-value	The genes annotated to this term
BP	GO:0051656	establishment of organelle localization	0.000521261	YOL006C, YPL085W
CC	No terms were found for this aspect with a corrected P-value <= 0.05.
MF	No terms were found for this aspect with a corrected P-value <= 0.05.
Group 213 Density 0			P-value 0.000397690060219855
members	partners
YBR166C	YBL105C YNL209W YNL317W
YHR070W	YBL105C YFR021W YJL154C
YIL143C	YBL105C
YMR113W	YBL105C YLR418C
YMR219W	YBL105C YCR042C
	GOID	Term	P-value	The genes annotated to this term
BP	GO:0019438	aromatic compound biosynthetic process	0.00039769	YMR113W, YBR166C
CC	No terms were found for this aspect with a corrected P-value <= 0.05.
MF	No terms were found for this aspect with a corrected P-value <= 0.05.
Group 218 Density 0			P-value 0.0031322262576761
members	partners
YDL203C	YER012W
YHR054C	YML091C
YJL132W	YER012W
YLR290C	YER012W
YOR355W	YFL002C YLR060W YML091C YML092C
	GOID	Term	P-value	The genes annotated to this term
BP	No terms were found for this aspect with a corrected P-value <= 0.05
CC	No terms were found for this aspect with a corrected P-value <= 0.05
MF	GO:0003674	molecular_function	0.00313223	YOR355W, YLR290C, YDL203C, YJL132W, YHR054C
Group 227 Density 0			P-value 0.000523283527290618
members	partners
YHL007C	YMR049C
YHR138C	YIL094C YMR049C
YLL008W	YMR049C
YOR272W	YGR103W YMR049C
YPR008W	YBL003C YDR176W YGL043W YMR049C
	GOID	Term	P-value	The genes annotated to this term
BP	GO:0007033	vacuole organization	0.000940646	YHR138C, YHL007C
CC	GO:0030687	preribosome, large subunit precursor	0.000523284	YOR272W, YLL008W
MF	No terms were found for this aspect with a corrected P-value <= 0.05
Group 228 Density 0			P-value 0.0000477488185662907
members	partners
YBR214W	YDL047W
YJL098W	YBR011C YDL047W YDR293C YGR090W YGR161C YPL012W
YKR028W	YDL047W YDR293C YPR161C
	GOID	Term	P-value	The genes annotated to this term
BP	GO:0002097	tRNA wobble base modification	4.77488e-05	YJL098W, YKR028W
	GO:0000082	G1/S transition of mitotic cell cycle	0.000138724	YJL098W, YKR028W
	GO:0051329	interphase of mitotic cell cycle	0.000888958	YJL098W, YKR028W
CC	No terms were found for this aspect with a corrected P-value <= 0.05
MF	No terms were found for this aspect with a corrected P-value <= 0.05
Group 232 Density 0			P-value 0.000101640010568834
members	partners
YDL040C	YAR044W YBR189W YDL014W YDL031W YDR303C YDR381W YHR013C YLR175W YLR197W YMR229C YMR290C YOR253W
YDL168W	YAL036C YBR142W YDL014W YLR002C YMR229C YMR290C YNL061W YOR206W
YDR060W	YAL051W YDL014W YHR066W YJL033W YJL050W YMR229C YMR290C YOR206W
YER063W	YDL014W YIL070C YKR048C YMR229C YMR308C
YER147C	YAR073W YBL003C YBR010W YDL014W YDR087C YDR111C YDR180W YFL016C YGR090W YHR121W YJL074C YLR432W YMR229C
YGR103W	YBR142W YDL014W YDL208W YGR067C YJL138C YJL192C YKR048C YKR081C YLR347C YML059C YMR023C YMR049C YMR076C YMR229C YMR290C YNL189W YOR272W YOR294W YPL093W
YHR052W	YBR142W YDL014W YDR028C YDR381W YJL124C YMR229C YMR290C YNL110C YOR294W
YIR001C	YDL014W YDR381W YER003C YGR090W YGR250C YHR121W YMR198W YMR229C YPR161C
YKL113C	YBR088C YMR229C YMR308C
YKR024C	YDL014W YDR381W YFR001W YKR081C YMR229C YNL061W YOR206W YOR294W
YLR455W	YBL002W YBL052C YDL014W YDR174W YDR381W YJR082C YKL172W YLR150W YLR196W YLR197W YMR229C YMR290C YNL088W YNL248C YOL077C YOR064C YOR206W YOR294W YOR310C
YOR056C	YDL014W YHR027C YMR229C YMR290C
YPL220W	YDL014W YDL156W YJL050W YKR048C YLR075W YLR432W YMR290C YPL116W YPR080W
	GOID	Term	P-value	The genes annotated to this term
BP	GO:0042273	ribosomal large subunit biogenesis	1.57771e-05	YKR024C, YHR052W, YDR060W, YGR103W
CC	GO:0005730	nucleolus	3.43306e-05	YKR024C, YHR052W, YKL113C, YOR056C, YDR060W, YGR103W
	GO:0030687	preribosome, large subunit precursor	0.00010164	YHR052W, YDR060W, YGR103W
	GO:0043228	non-membrane-bounded organelle	0.000172021	YKR024C, YHR052W, YKL113C, YDR060W, YGR103W, YDL040C, YER147C, YPL220W, YOR056C
MF	No terms were found for this aspect with a corrected P-value <= 0.05
Group 233 Density 0			P-value 0.00019804108289251
members	partners
YJL084C	YBL037W YDR388W YER021W YER125W YJR005W
YOL062C	YBL037W YJR058C
YOR043W	YIL135C YLL010C
	GOID	Term	P-value	The genes annotated to this term
BP	GO:0016192	vesicle-mediated transport	0.000198041	YOR043W, YOL062C, YJL084C
	GO:0006897	endocytosis	0.000651254	YOR043W, YJL084C
CC	No terms were found for this aspect with a corrected P-value <= 0.05
MF	No terms were found for this aspect with a corrected P-value <= 0.05
Group 236 Density 0			P-value 2.38208289728138E-16
members	partners
YDL116W	YGL092W
YGL100W	YGL092W
YJR042W	YGL092W YPL169C
YKL057C	YGL092W
YLR208W	YDL195W YDR164C YGL092W
	GOID	Term	P-value	The genes annotated to this term
BP	GO:0006999	nuclear pore organization	4.82134e-13	YJR042W, YLR208W, YDL116W, YKL057C, YGL100W
	GO:0006408	snRNA export from nucleus	9.11147e-12	YJR042W, YDL116W, YKL057C, YGL100W
	GO:0006608	snRNP protein import into nucleus	9.11147e-12	YJR042W, YDL116W, YKL057C, YGL100W
CC	GO:0031080	Nup107-160 complex	2.38208e-16	YJR042W, YLR208W, YDL116W, YKL057C, YGL100W
	GO:0005643	nuclear pore	4.74954e-11	YJR042W, YLR208W, YDL116W, YKL057C, YGL100W
	GO:0035859	Seh1-associated complex	1.37211e-05	YLR208W, YGL100W
MF	GO:0005198	structural molecule activity	6.55464e-07	YJR042W, YLR208W, YDL116W, YKL057C, YGL100W
Group 239 Density 0			P-value 0.00257038887798667
members	partners
YBR097W	YDR388W
YDL125C	YDR388W
YDR243C	YDR388W
YGL175C	YDR388W
YIL015W	YDR388W
YLR096W	YDR388W
	GOID	Term	P-value	The genes annotated to this term
BP	No terms were found for this aspect with a corrected P-value <= 0.05
CC	No terms were found for this aspect with a corrected P-value <= 0.05
MF	GO:0003824	catalytic activity	0.00257039	YGL175C, YDL125C, YDR243C, YBR097W, YIL015W, YLR096W
Group 240 Density 0			P-value 0.000805036277700417
members	partners
YIR021W	YNL162W YOL052C
YLR113W	YLR248W YNL162W
YNL091W	YER088C YKL075C YNL162W YOL159C-A
	GOID	Term	P-value	The genes annotated to this term
BP	GO:0006970	response to osmotic stress	0.000805036	YNL091W, YLR113W
	GO:0009628	response to abiotic stimulus	0.00222472	YNL091W, YLR113W
CC	No terms were found for this aspect with a corrected P-value <= 0.05
MF	No terms were found for this aspect with a corrected P-value <= 0.05
Group 241 Density 0			P-value 0.00158722991770434
members	partners
YCL054W	YPR161C
YDR117C	YPR161C
YGR012W	YNL307C YPR161C
YIL154C	YGR237C YPR161C
YJL131C	YBR221C YPR161C
YKR028W	YDL047W YDR293C YPR161C
YLR226W	YCR028C-A YPR161C
YLR276C	YMR229C YMR308C YPR161C
	GOID	Term	P-value	The genes annotated to this term
BP	No terms were found for this aspect with a corrected P-value <= 0.05
CC	No terms were found for this aspect with a corrected P-value <= 0.05
MF	GO:0003743	translation initiation factor activity	0.00158723	YJL131C, YDR117C
Group 243 Density 0			P-value 2.38844800162019E-06
members	partners
YDR129C	YAR007C YCR008W YDL095W YEL037C YGL092W YJL092W YJL138C YKL126W YLR203C YLR330W YOL013C YPL022W
YIL105C	YAL027W YBR159W YDR314C YDR440W YGR135W YKL126W YOL038W YPL208W YPR161C
YML095C	YAL027W YPL022W
YNL106C	YAL027W YCR008W YDR440W YEL060C YKL126W YPR161C
YPR171W	YAL027W YCR008W YDR099W YGL106W YHR076W YML069W YMR079W YNL172W YOL139C YPR161C
	GOID	Term	P-value	The genes annotated to this term
BP	GO:0006897	endocytosis	6.18493e-05	YPR171W, YNL106C, YDR129C
	GO:0016192	vesicle-mediated transport	0.000156716	YPR171W, YNL106C, YIL105C, YDR129C
	GO:0007015	actin filament organization	0.00106962	YIL105C, YDR129C
CC	GO:0044448	cell cortex part	2.38845e-06	YPR171W, YNL106C, YIL105C, YDR129C
	GO:0043332	mating projection tip	8.34668e-05	YPR171W, YNL106C, YDR129C
	GO:0000267	cell fraction	0.000976971	YPR171W, YNL106C, YIL105C
MF	GO:0030674	protein binding, bridging	0.000716074	YPR171W, YDR129C
Group 245 Density 0			P-value 0.00174601090774447
members	partners
YBR267W	YKR048C
YCL024W	YKR048C
YDL055C	YJL034W YKR048C YOR257W YPR034W
YER023W	YDR385W YIL070C YKR048C
YKR011C	YDR388W YKR048C YLR314C
YLR410W	YEL012W YKR048C YML069W
YMR110C	YKR048C
YMR139W	YDR507C YKR048C
YNL078W	YKR048C YOL070C
YOR230W	YKR048C
	GOID	Term	P-value	The genes annotated to this term
BP	No terms were found for this aspect with a corrected P-value <= 0.05
CC	No terms were found for this aspect with a corrected P-value <= 0.05
MF	GO:0016772	transferase activity, transferring phosphorus-containing groups	0.00174601	YCL024W, YMR139W, YLR410W, YDL055C
Group 247 Density 0			P-value 8.40355342898376E-06
members	partners
YDL099W	YDR517W
YIL109C	YDR517W
YNL056W	YNL099C
YPR181C	YDR517W YMR186W YNL049C
	GOID	Term	P-value	The genes annotated to this term
BP	GO:0006888	ER to Golgi vesicle-mediated transport	8.40355e-06	YPR181C, YIL109C, YDL099W
CC	GO:0030127	COPII vesicle coat	1.05893e-05	YPR181C, YIL109C
	GO:0012507	ER to Golgi transport vesicle membrane	3.5246e-05	YPR181C, YIL109C
MF	No terms were found for this aspect with a corrected P-value <= 0.05
Group 249 Density 0			P-value 0.0000248237266593853
members	partners
YBR273C	YDL126C
YDL190C	YDL126C YEL037C
YDR330W	YDL126C
YFL044C	YDL126C
YGL108C	YDL126C
YMR067C	YDL126C YPL216W
	GOID	Term	P-value	The genes annotated to this term
BP	GO:0006508	proteolysis	0.00021131	YDL190C, YFL044C, YMR067C, YDR330W, YBR273C
	GO:0006511	ubiquitin-dependent protein catabolic process	2.48237e-05	YDL190C, YMR067C, YDR330W, YBR273C
	GO:0043161	proteasomal ubiquitin-dependent protein catabolic process	0.000165758	YDL190C, YMR067C, YDR330W
CC	No terms were found for this aspect with a corrected P-value <= 0.05
MF	No terms were found for this aspect with a corrected P-value <= 0.05
Group 250 Density 0			P-value 3.02763799789505E-06
members	partners
YDR332W	YGR220C YJL107C
YGR076C	YCR071C YGR220C
YHR137W	YHR183W YLR278C YOR310C
YLR439W	YCR071C YDR405W
YNL284C	YCR071C YDR405W YDR462W YGR220C
	GOID	Term	P-value	The genes annotated to this term
BP	GO:0032543	mitochondrial translation	6.30544e-05	YNL284C, YGR076C, YLR439W
	GO:0007005	mitochondrion organization	0.00124445	YNL284C, YGR076C, YLR439W
CC	GO:0000315	organellar large ribosomal subunit	3.02764e-06	YNL284C, YGR076C, YLR439W
	GO:0005762	mitochondrial large ribosomal subunit	3.02764e-06	YNL284C, YGR076C, YLR439W
MF	GO:0003735	structural constituent of ribosome	0.000426516	YNL284C, YGR076C, YLR439W
	GO:0005198	structural molecule activity	0.00179799	YNL284C, YGR076C, YLR439W
Group 252 Density 0			P-value 5.89155040224673E-06
members	partners
YBR291C	YJR010C-A YLR435W
YDL015C	YJR010C-A
YDL081C	YJR010C-A
YDR033W	YJR010C-A
YER145C	YJR010C-A
YFR022W	YJR010C-A
YGL055W	YAL007C YJR010C-A
YLR066W	YJR010C-A
YLR185W	YJR010C-A YKL028W YPL001W
YLR342W	YAL007C YIL043C YJR010C-A
YML055W	YJR010C-A YML012W
YML072C	YIL043C YJR010C-A
YNR021W	YJR010C-A
YOR086C	YJR010C-A YLR249W
YOR193W	YJR010C-A
YPL249C-A	YIL043C YJR010C-A
	GOID	Term	P-value	The genes annotated to this term
BP	GO:0006465	signal peptide processing	0.00012282	YLR066W, YML055W
CC	GO:0044432	endoplasmic reticulum part	1.37801e-05	YML072C, YLR066W, YOR086C, YGL055W, YDL015C, YNR021W, YML055W
	GO:0005787	signal peptidase complex	3.5246e-05	YLR066W, YML055W
	GO:0016021	integral to membrane	4.9782e-05	YER145C, YML072C, YLR066W, YBR291C, YOR086C, YDL015C, YML055W, YLR342W, YGL055W, YDR033W, YNR021W
MF	GO:0005544	calcium-dependent phospholipid binding	5.89155e-06	YML072C, YOR086C
Group 254 Density 0			P-value 0.0000179474490926946
members	partners
YGL251C	YDL134C YLR249W
YIL034C	YDR159W YLR171W YLR249W
YIL115C	YJL041W YJL061W YKR082W YLR249W YOR046C
YMR255W	YDR283C YGL122C YOR046C
YOR086C	YJR010C-A YLR249W
YPL226W	YBR072W YDL095W YLR249W
	GOID	Term	P-value	The genes annotated to this term
BP	GO:0006406	mRNA export from nucleus	1.79474e-05	YPL226W, YIL115C, YMR255W
	GO:0016973	poly(A)+ mRNA export from nucleus	0.000218818	YPL226W, YIL115C
	GO:0015931	nucleobase-containing compound transport	0.000222935	YPL226W, YIL115C, YMR255W
CC	GO:0005643	nuclear pore	0.0011486	YIL115C, YMR255W
	GO:0046930	pore complex	0.00127223	YIL115C, YMR255W
MF	No terms were found for this aspect with a corrected P-value <= 0.05
Group 255 Density 0			P-value 0.0000965725402222657
members	partners
YBR108W	YCR009C YDR388W YGR086C YPL004C
YDL143W	YDR087C YDR188W YGL121C YGR086C YGR245C YIL142W YKL054C YKL142W YOL004W YPL004C
YDR490C	YBR049C YDR099W YGR086C YPL004C YPL005W
YFR019W	YDL111C YER021W YFL016C YGR086C YKL054C YNL135C YPL004C
YGR237C	YGR086C YIL154C YKR081C YLR432W YML056C
YHR216W	YAR073W YER050C YKL212W YLR432W YML056C
YKL142W	YDL143W YEL043W YFL054C YGR086C YIL051C YJL129C YKL048C YLR179C YNL067W YPL004C
YLR179C	YAL047C YGR086C YIL020C YKL142W YPL004C
YMR086W	YER177W YGR086C YLR429W YMR031C YPL004C
YNL067W	YGR086C YKL142W YLR432W YNL246W YPL004C
YOR360C	YER025W YLR432W YML056C
	GOID	Term	P-value	The genes annotated to this term
BP	No terms were found for this aspect with a corrected P-value <= 0.05
CC	GO:0032126	eisosome	9.65725e-05	YDR490C, YMR086W
	GO:0044448	cell cortex part	0.00120854	YDR490C, YBR108W, YMR086W
MF	No terms were found for this aspect with a corrected P-value <= 0.05
Group 257 Density 0			P-value 0.0000405582602419977
members	partners
YKL114C	YCR028C-A YDL235C YDR381W YNL189W YPL127C
YLR418C	YBR221C YBR279W YGL017W YGL207W YGL244W YGR043C YGR252W YIL035C YJR148W YLR150W YMR113W YMR186W YNL126W YNL189W YOL145C YOR061W YOR123C YOR138C YPL243W
YOR048C	YDR289C YDR326C YDR381W YGL246C
	GOID	Term	P-value	The genes annotated to this term
BP	No terms were found for this aspect with a corrected P-value <= 0.05
CC	No terms were found for this aspect with a corrected P-value <= 0.05
MF	GO:0016796	exonuclease activity, active with either ribo- or deoxyribonucleic acids and producing 5'-phosphomonoesters	4.05583e-05	YKL114C, YOR048C

## Sheet: BioGRID
BioGRID
Group 1 Density 0			P-value 0.0000205687674146081
members	partners
RP11-544A12.7	YBR017C YGR218W
YDL063C	YBR017C YDR381W YLL039C YPL131W
YHR192W	YCL037C YDR515W YER110C YGL122C
YKL120W	YBR017C YDR414C YER110C YFR004W YHR027C YHR195W YHR200W YKR016W YLL039C YLR207W YML008C YNL121C YNR055C YOR117W
YLR426W	YBR017C YHR016C YHR114W YPL151C
YMR241W	YBL045C YBR017C YBR160W YCL037C YDR510W YER110C YFR004W YGL122C YGL158W YGR040W YHR027C YKR016W YKR026C YLL039C YML065W YNL255C YOL132W YOR181W
YNL035C	YBR017C YDR122W YDR287W YDR510W YGL122C
YNL169C	YBR017C YBR183W YLL039C
YNR069C	YBR017C YEL061C YER018C YER125W YGL122C YJR011C YLL049W YNR068C
	GOID	Term	P-value	The genes annotated to this term
BP	GO:0006835	dicarboxylic acid transport	2.05688e-05	YMR241W, YKL120W
	GO:0006820	anion transport	0.000755874	YMR241W, YKL120W
CC	GO:0031966	mitochondrial membrane	0.000645298	YLR426W, YMR241W, YKL120W, YNL169C
	GO:0005740	mitochondrial envelope	0.00084423	YLR426W, YMR241W, YKL120W, YNL169C
MF	GO:0015291	secondary active transmembrane transporter activity	0.00197463	YMR241W, YKL120W
	GO:0046943	carboxylic acid transmembrane transporter activity	0.00204647	YMR241W, YKL120W
	GO:0005342	organic acid transmembrane transporter activity	0.00226943	YMR241W, YKL120W
Group 2 Density 0			P-value 0.0000371822984525482
members	partners
YDR059C	YBR082C YCL037C YDL140C YER068W YGL141W YHR193C YJL106W YLL039C YPL037C YPR093C YPR103W
YDR177W	YCL037C YDR226W YER012W YGL122C YGR229C YKL168C YKL210W YLL039C YPL269W YPR093C YPR103W
YKR064W	YCL017C YGL141W YGR286C YOR249C YPL240C
	GOID	Term	P-value	The genes annotated to this term
BP	GO:0000209	protein polyubiquitination	3.71823e-05	YDR177W, YDR059C
	GO:0016567	protein ubiquitination	0.000473277	YDR177W, YDR059C
	GO:0032446	protein modification by small protein conjugation	0.000750758	YDR177W, YDR059C
CC	GO:0000502	proteasome complex	0.000179524	YDR177W, YDR059C
MF	GO:0004842	ubiquitin-protein ligase activity	0.000473277	YDR177W, YDR059C
	GO:0019787	small conjugating protein ligase activity	0.00057154	YDR177W, YDR059C
	GO:0016881	acid-amino acid ligase activity	0.000721615	YDR177W, YDR059C
Group 8 Density 0			P-value 2.19237867249813E-15
members	partners
YBL028C	YCL037C YDR515W YFL002C YGL122C YKL172W YKR081C
YBR012W-A	YBL032W YFR004W YKR081C
YDR098C-B	YKL049C YKR081C
YDR261C-C	YFR004W YKL049C YKR081C
YDR316W-A	YFR004W YKR081C
YDR339C	YBL045C YFL002C YGL006W YGL122C YIL019W YJR002W YKR081C YOR310C
YDR500C	YCL037C YDL182W YDR515W YGL122C YKR081C YNL255C
YER159C-A	YFR004W YKR081C
YGR038C-B	YKL049C YKR081C
YGR161C-C	YDL106C YFR004W YKL057C YKR081C YOR290C
YJR028W	YDL106C YFR004W YHR115C YKR081C YMR139W
YKL099C	YCL037C YCR057C YFL002C YIL019W YJL069C YJR002W YKL082C YKR081C YNL255C YNL298W YOR310C
YLR262C-A	YCL037C YDR515W YGL122C YKR016W YKR081C
YMR051C	YFR004W YKR081C YPL253C
YOR118W	YKR081C
YOR142W-A	YFR004W YKR081C
	GOID	Term	P-value	The genes annotated to this term
BP	GO:0032197	transposition, RNA-mediated	2.44818e-15	YDR261C-C, YDR098C-B, YGR038C-B, YMR051C, YJR028W, YOR142W-A, YBR012W-A, YGR161C-C, YDR316W-A, YER159C-A
CC	GO:0000943	retrotransposon nucleocapsid	2.19238e-15	YDR261C-C, YDR098C-B, YGR038C-B, YMR051C, YJR028W, YOR142W-A, YBR012W-A, YGR161C-C, YDR316W-A, YER159C-A
	GO:0044428	nuclear part	1.77457e-07	YDR261C-C, YKL099C, YDR339C, YDR098C-B, YGR038C-B, YMR051C, YJR028W, YOR142W-A, YBL028C, YBR012W-A, YGR161C-C, YDR316W-A, YER159C-A
	GO:0044422	organelle part	0.000558876	YDR261C-C, YDR500C, YKL099C, YDR339C, YDR098C-B, YGR038C-B, YMR051C, YJR028W, YOR142W-A, YGR161C-C, YBL028C, YBR012W-A, YDR316W-A, YER159C-A
MF	GO:0003723	RNA binding	1.21588e-06	YDR261C-C, YDR500C, YDR098C-B, YGR038C-B, YMR051C, YJR028W, YOR142W-A, YBR012W-A, YGR161C-C, YDR316W-A, YER159C-A
	GO:0003676	nucleic acid binding	0.000169939	YDR261C-C, YDR500C, YDR098C-B, YGR038C-B, YMR051C, YJR028W, YOR142W-A, YBR012W-A, YGR161C-C, YDR316W-A, YER159C-A
Group 9 Density 0			P-value 0.000111924482506724
members	partners
YBL103C	YBL032W YBR009C YBR010W YBR112C YDR212W YDR448W YFR021W YHR079C YHR099W YHR186C YIR023W YJL176C YJR066W YLL039C YLR423C YML091C YMR033W YMR227C YNL006W YNL030W YNL076W YNR023W YOL067C YOL108C YPL204W YPL240C
YER065C	YBR009C YDR354W YHR186C YJL168C YJR066W YLL039C YLR270W YNL006W YPL180W
YGL229C	YBR109C YBR196C YHR186C YJL013C YJL030W YJL178C YJR066W YLL022C YMR181C YNL006W YNL076W YOR062C YPL180W YPR040W
YKR097W	YBR160W YDL042C YDL101C YER125W YFL010C YHR186C YIL030C YJL168C YJR066W YKL012W YKL171W YLL039C YML086C YNL006W YNL079C YOR244W YPL180W YPL203W YPR152C
YLR403W	YBL032W YBR111W-A YBR175W YBR198C YCL028W YDL014W YDR099W YDR450W YER177W YGR017W YHR099W YHR186C YIL035C YJL115W YJR066W YKL139W YKR063C YLL039C YNL006W YNL157W YOR025W YOR061W YOR370C YPL082C YPL180W YPR190C
YOL126C	YCL043C YDL100C YDL147W YHR186C YIL108W YIL128W YIR033W YIR038C YJR066W YJR068W YLL039C YLR300W YLR377C YMR246W YNL006W YOR347C YPL180W
	GOID	Term	P-value	The genes annotated to this term
BP	GO:0006094	gluconeogenesis	0.000111924	YKR097W, YOL126C
	GO:0019319	hexose biosynthetic process	0.000153429	YKR097W, YOL126C
	GO:0006099	tricarboxylic acid cycle	0.000316622	YER065C, YOL126C
CC	No terms were found for this aspect with a corrected P-value <= 0.05.
MF	GO:0016830	carbon-carbon lyase activity	0.00040765	YKR097W, YER065C
Group 13 Density 0			P-value 0.0000371822984525484
members	partners
YBL028C	YCL037C YDR515W YFL002C YGL122C YKL172W YKR081C
YCL018W	YDR510W YFL002C YJL074C YLL039C YLR086W YPL031C
YDL121C	YDL100C YMR047C YNL255C
YDL219W	YDL047W YFL002C YGL122C YHR082C YNL255C
YDR065W	YFL002C YPR116W
YDR232W	YAL024C YBL032W YFL002C YLL039C
YDR514C	YFL002C YOL012C
YER060W	YBL032W YFL002C YJL106W
YER176W	YFL002C
YFR041C	YDR515W YFL002C YGL256W
YGL170C	YDL154W YFL009W YMR047C YOL091W
YHL038C	Q0105 YDL213C YFL002C
YJL125C	YDR381W YER030W YFL002C YJR066W YNL062C
YJL155C	YBL085W YDL117W YER112W YFL002C YLL039C YLR345W YNL255C
YJL209W	YBL032W YFL002C YGL122C YJL095W YLR067C
YKL138C	YDR515W YFL002C YGL122C YHL004W YNL255C
YKL208W	YFL002C
YLR243W	YDR388W YFL002C YFR004W YHR016C YJR072C YOR258W
YMR097C	YBR198C YFL002C YGL112C YGL122C
YNL213C	YDR283C YFL002C YGL122C
YOL080C	YDL229W YDR130C YFL002C YNL255C YOR310C YPL178W
YOR289W	YDR475C YGL122C YMR047C YPR016C
YPL029W	YBR175W YFL002C YMR287C YPL194W
	GOID	Term	P-value	The genes annotated to this term
BP	GO:0000957	mitochondrial RNA catabolic process	3.71823e-05	YPL029W, YJL209W
	GO:0000002	mitochondrial genome maintenance	0.000317597	YPL029W, YDR065W, YNL213C
	GO:0000372	Group I intron splicing	0.00054923	YPL029W, YHL038C
CC	No terms were found for this aspect with a corrected P-value <= 0.05.
MF	No terms were found for this aspect with a corrected P-value <= 0.05.
Group 19 Density 0			P-value 0.000753252389587985
members	partners
YBR045C	YBR148W YDR103W YER133W YGL057C YGL122C YMR001C
YDL169C	YGL122C YNL172W
YDL186W	YHR079C YLR452C YMR001C YNL307C YPL031C
YGR131W	YNL172W
YHR015W	YBR059C YDR172W YGL122C YMR001C YPL169C
YHR184W	YDL239C YDR416W YER018C YJR059W YMR001C YPL018W
YIL031W	YBL032W YBR160W YCR086W YDR510W YGL122C YJL092W YMR001C
YOR192C-A	YBR261C YLL039C YLR291C YMR001C
YPL192C	YER031C YFR004W YML064C YMR001C YMR065W
	GOID	Term	P-value	The genes annotated to this term
BP	No terms were found for this aspect with a corrected P-value <= 0.05.
CC	GO:0005628	prospore membrane	0.000753252	YBR045C, YHR184W
	GO:0042763	intracellular immature spore	0.000753252	YBR045C, YHR184W
	GO:0042764	ascospore-type prospore	0.000753252	YBR045C, YHR184W
MF	No terms were found for this aspect with a corrected P-value <= 0.05.
Group 20 Density 0			P-value 1.47288760056169E-07
members	partners
YER062C	YBR139W YBR182C YCL037C YDL059C YDR328C YDR510W YER171W YFR004W YGL090W YHL032C YHR027C YHR200W YIL045W YJL173C YKL069W YLL039C YML058W YMR091C YNL281W YPL201C YPR152C
YIL053W	YAL005C YBR182C YBR194W YDL059C YDL229W YDR328C YDR510W YER151C YER171W YFL002C YFR004W YFR014C YGL237C YHL032C YHR027C YHR152W YHR200W YIL021W YIL095W YJL173C YJR035W YKL130C YLL039C YNR051C YOL016C YOR117W YOR151C YPL031C YPL106C YPL201C YPR152C
YMR131C	YBR010W YFL046W YFR034C YGL123W YGR103W YGR275W YJL030W YJL070C YJL190C YLR106C YMR047C YNL002C YNL031C YNL178W YNL255C YOR001W YOR063W YOR319W YPL042C YPL144W YPL207W
	GOID	Term	P-value	The genes annotated to this term
BP	GO:0006114	glycerol biosynthetic process	4.4182e-07	YER062C, YIL053W
	GO:0019401	alditol biosynthetic process	4.4182e-07	YER062C, YIL053W
	GO:0046173	polyol biosynthetic process	1.47243e-06	YER062C, YIL053W
CC	No terms were found for this aspect with a corrected P-value <= 0.05.
MF	GO:0000121	glycerol-1-phosphatase activity	1.47289e-07	YER062C, YIL053W
	GO:0042578	phosphoric ester hydrolase activity	0.00110891	YER062C, YIL053W
Group 22 Density 0			P-value 0.000323443924255704
members	partners
YLR354C	YDL229W YDR510W YER151C YFL010C YFR004W YGL122C YGR043C YHR027C YHR200W YIR034C YJL068C YJR017C YKL108W YLL039C YNL053W YOR117W YPR152C
YOL017W	YBR245C YDL042C YJL068C YKL204W YOL051W YPL245W
YOR125C	YBL045C YDR204W YDR243C YDR456W YGL122C YGL192W YJL068C YLL039C YLR201C YOL096C
	GOID	Term	P-value	The genes annotated to this term
BP	GO:0006733	oxidoreduction coenzyme metabolic process	0.000323444	YLR354C, YOR125C
	GO:0006006	glucose metabolic process	0.00033321	YLR354C, YOR125C
	GO:0019318	hexose metabolic process	0.000558755	YLR354C, YOR125C
CC	No terms were found for this aspect with a corrected P-value <= 0.05.
MF	No terms were found for this aspect with a corrected P-value <= 0.05.
Group 23 Density 0			P-value 0.00572152977800343
members	partners
YDR266C	YBL016W YBL032W YDR510W YHR079C YHR082C YIR010W YLL039C YML010W YMR012W YNL154C YOR232W YPL153C YPR114W
YHR146W	YIR010W YLL039C YML010W YMR297W YPL153C YPL154C
YLL054C	YDR381W YDR507C YER012W YPR119W
YHR202W	YJL092W YKL012W YPL153C YPL240C
YNL166C	YCL024W YCR002C YDR507C YHR023W YHR107C YIR010W YJL164C YJR059W YJR076C YLR314C YOR244W YPL031C YPL153C
	GOID	Term	P-value	The genes annotated to this term
BP	GO:0008150	biological_process	0.00572153	YHR146W, YNL166C, YLL054C, YHR202W, YDR266C
CC	No terms were found for this aspect with a corrected P-value <= 0.05.
MF	No terms were found for this aspect with a corrected P-value <= 0.05.
Group 27 Density 0			P-value 4.81825340137848E-09
members	partners
YDL193W	YBR041W YCL037C YGL008C YGL195W YJR132W YLL039C YLR293C YOR185C YPL240C
YER009W	YBR049C YDR143C YDR515W YGL122C YJL041W YKL130C YLL039C YLR293C YMR059W YOL128C YPL031C
YGL016W	YBL084C YBR217W YDL029W YDL055C YDR388W YDR427W YFL037W YGR180C YGR231C YJL026W YJR121W YKL058W YLL039C YLR293C YLR335W YML124C YMR047C YOR098C YOR185C YOR194C YOR229W YOR230W YOR361C YPR110C
YGL097W	YBL002W YBL003C YBR009C YBR010W YBR160W YDL003W YDR002W YDR190C YDR224C YDR225W YER110C YFL039C YFR034C YFR037C YGL133W YGL207W YGR218W YHR088W YIL063C YLR293C YLR335W YML065W YML121W YNL030W YNL031C YNL189W YNL247W YOL012C YOL021C YOR185C YOR304W YPL037C YPL127C YPL235W
YGL164C	YLR293C YNL255C YOR185C
YJR074W	YBL032W YDL235C YGL122C YHR206W YIL147C YLR293C YMR314W YOR185C YPL240C
YKL205W	YER025W YER100W YGL122C YGR074W YGR128C YJL041W YKL144C YLL039C YLR291C YLR293C YLR335W YOR112W YOR185C
YMR235C	YBL016W YBR010W YDR002W YDR192C YDR507C YDR510W YDR523C YER151C YFL002C YFR004W YGL158W YGR218W YHR027C YHR200W YIL115C YIL125W YJL130C YKL048C YLL039C YLR119W YLR262C YLR293C YMR047C YMR300C YNL031C YNL255C YOR112W YOR185C YPL111W YPL141C YPL209C
	GOID	Term	P-value	The genes annotated to this term
BP	GO:0006913	nucleocytoplasmic transport	4.81825e-09	YMR235C, YKL205W, YGL016W, YJR074W, YGL097W, YER009W
	GO:0051169	nuclear transport	4.81825e-09	YMR235C, YKL205W, YGL016W, YJR074W, YGL097W, YER009W
	GO:0006606	protein import into nucleus	2.27962e-07	YMR235C, YGL016W, YJR074W, YER009W
CC	GO:0005634	nucleus	0.000232282	YMR235C, YKL205W, YGL016W, YDL193W, YJR074W, YGL097W, YGL164C, YER009W
	GO:0016021	integral to membrane	0.00158178	YMR235C, YKL205W, YGL016W, YDL193W, YGL097W, YER009W
MF	GO:0008536	Ran GTPase binding	5.16742e-09	YKL205W, YJR074W, YER009W
	GO:0031267	small GTPase binding	3.6752e-07	YKL205W, YJR074W, YER009W
Group 29 Density 0			P-value 1.05045372996507E-07
members	partners
snR6	LSR1 YCR063W YDL209C YMR268C
snR7-L	YCR063W
snR7-S	YCR063W YMR239C
	GOID	Term	P-value	The genes annotated to this term
BP	GO:0000393	spliceosomal conformational changes to generate catalytic conformation	1.05045e-07	snR7-L, snR7-S, snR6
	GO:0034403	alignment of 3' and 5' splice sites of nuclear mRNA	2.94578e-07	snR7-L, snR7-S
	GO:0000350	generation of catalytic spliceosome for second transesterification step	1.05893e-05	snR7-L, snR7-S
CC	GO:0046540	U4/U6 x U5 tri-snRNP complex	5.01974e-07	snR7-L, snR7-S, snR6
	GO:0030532	small nuclear ribonucleoprotein complex	4.19371e-06	snR7-L, snR7-S, snR6
MF	GO:0030627	pre-mRNA 5'-splice site binding	4.41497e-06	snR7-L, snR7-S
	GO:0000386	second spliceosomal transesterification activity	2.67394e-05	snR7-L, snR7-S
Group 30 Density 0			P-value 3.57815734677588E-11
members	partners
YDL161W	YBL047C YDR379W YGL206C YHR016C YIL095W YIR006C YLL039C YLR116W YOR111W YOR127W YOR181W YPL115C
YGR241C	YBL032W YBL047C YBR010W YCR030C YER166W YFR024C-A YGL122C YGL181W YGL206C YGR167W YHR016C YIL095W YIR006C YJR059W YLL017W YLL039C YNL020C YNL031C YNL084C YPL077C
YHR161C	YAL032C YBL032W YBL106C YBR009C YBR010W YBR059C YDL156W YDR099W YDR452W YEL026W YGL122C YGL181W YGL206C YGR167W YIL095W YIL122W YIR006C YLR106C YMR183C YNL020C YNL030W YNL031C YPL077C YPL232W
YLR206W	YAL041W YBL007C YBL032W YBL106C YBR059C YCR030C YDR379W YER125W YFR024C-A YGL122C YGL206C YGR268C YHL007C YHR016C YIL095W YJL020C YKR036C YLL039C YML051W YNL020C YOL111C YPL115C
YNL243W	YAL032C YBL007C YBL047C YBR010W YBR059C YBR079C YBR234C YCR024C YDR172W YDR388W YDR425W YER125W YER149C YFL039C YFR024C-A YGL181W YGL206C YGR167W YGR218W YHR016C YIL062C YIL095W YIR006C YJL014W YJR066W YKL013C YKL049C YKL182W YKL203C YLL039C YLR337C YLR370C YML058W-A YNL020C YNL031C YNL084C YNL094W YNL298W YNR035C YOR181W YOR284W YOR329C YPL266W
	GOID	Term	P-value	The genes annotated to this term
BP	GO:0006897	endocytosis	6.57234e-10	YNL243W, YHR161C, YGR241C, YLR206W, YDL161W
	GO:0048268	clathrin coat assembly	4.90963e-07	YHR161C, YGR241C
	GO:0016192	vesicle-mediated transport	6.6437e-07	YNL243W, YHR161C, YGR241C, YLR206W, YDL161W
CC	GO:0030479	actin cortical patch	4.33291e-11	YNL243W, YHR161C, YGR241C, YLR206W, YDL161W
	GO:0030863	cortical cytoskeleton	8.64868e-11	YNL243W, YHR161C, YGR241C, YLR206W, YDL161W
	GO:0044448	cell cortex part	3.24694e-09	YNL243W, YHR161C, YGR241C, YLR206W, YDL161W
MF	GO:0030276	clathrin binding	3.57816e-11	YHR161C, YGR241C, YLR206W, YDL161W
	GO:0008289	lipid binding	2.0717e-09	YNL243W, YHR161C, YGR241C, YLR206W, YDL161W
	GO:0005545	1-phosphatidylinositol binding	2.2038e-05	YHR161C, YGR241C
Group 32 Density 0			P-value 2.12468259520209E-06
members	partners
YDR387C	YLR292C
YHR092C	YGL122C YJR066W YKL203C YLL039C YLR292C YPR194C
YKL209C	YBR009C YER112W YER146W YIL030C YLL039C YLR292C YNL030W
YKR103W	YHR114W YLR292C YNL274C
YLR301W	YJL164C YJR059W YLL039C YLR292C YPL204W
YNL003C	YBL032W YCL037C YGR082W YHL042W YKR046C YLR292C YML008C
	GOID	Term	P-value	The genes annotated to this term
BP	GO:0055085	transmembrane transport	2.12468e-06	YKR103W, YDR387C, YNL003C, YHR092C, YKL209C
	GO:0051234	establishment of localization	5.58615e-05	YKR103W, YDR387C, YNL003C, YLR301W, YHR092C, YKL209C
	GO:0071702	organic substance transport	0.000343896	YDR387C, YNL003C, YHR092C
CC	GO:0044425	membrane part	0.000276438	YKR103W, YDR387C, YNL003C, YLR301W, YHR092C, YKL209C
MF	GO:0022857	transmembrane transporter activity	2.68632e-06	YKR103W, YDR387C, YNL003C, YHR092C, YKL209C
	GO:0022892	substrate-specific transporter activity	0.000160034	YDR387C, YNL003C, YHR092C, YKL209C
	GO:0016820	hydrolase activity, acting on acid anhydrides, catalyzing transmembrane movement of substances	0.00172856	YKR103W, YKL209C
Group 36 Density 0			P-value 0.00191815586058304
members	partners
YDR038C	YBL032W YJR066W YKL203C YLL039C YNL197C YNL217W YOR016C
YDR452W	YBR009C YBR081C YBR111W-A YBR198C YCL037C YER112W YGL122C YGR252W YHR161C YKL028W YKR092C YNL030W YNL217W YNL255C
YJL172W	YBL032W YCL008C YER125W YKL130C YLL039C YNL217W YPL240C
YOR099W	YCL037C YDR510W YFR004W YJL117W YLL039C YLR026C YNL217W YOL018C YOL132W
	GOID	Term	P-value	The genes annotated to this term
BP	No terms were found for this aspect with a corrected P-value <= 0.05.
CC	GO:0016021	integral to membrane	0.00191816	YOR099W, YDR038C, YJL172W, YDR452W
MF	No terms were found for this aspect with a corrected P-value <= 0.05.
Group 39 Density 0			P-value 0.0000492911841746138
members	partners
YHL003C	YBR036C YCL025C YDR331W YEL002C YGL122C YGL158W YGR060W YHL048W YHR110W YHR142W YJL183W YJR010C-A YKL008C YMR149W YMR298W YNL101W YOR092W YOR223W YPL094C YPL150W
YJL091C	YBL032W YCL061C YDR170C YDR307W YDR331W YEL063C YHL048W YHR019C YJR100C YMR215W YOL020W YOR254C YPL076W YPL240C
YNL130C	YAL007C YAR002C-A YBR106W YBR159W YDR515W YER039C YGL200C YGR295C YHL048W YHR007C YHR110W YHR123W YIL114C YML012W YML016C YMR149W YNL125C YNL336W YOR016C YOR067C YPL246C
	GOID	Term	P-value	The genes annotated to this term
BP	GO:0044255	cellular lipid metabolic process	4.92912e-05	YJL091C, YNL130C, YHL003C
	GO:0046474	glycerophospholipid biosynthetic process	0.000233722	YJL091C, YNL130C
CC	GO:0005792	microsome	6.38832e-05	YJL091C, YNL130C
	GO:0042598	vesicular fraction	7.28262e-05	YJL091C, YNL130C
	GO:0005789	endoplasmic reticulum membrane	0.000149874	YJL091C, YNL130C, YHL003C
MF	GO:0016747	transferase activity, transferring acyl groups other than amino-acyl groups	0.000826112	YJL091C, YHL003C
Group 43 Density 0			P-value 0.000503426818288607
members	partners
YGR224W	YBR106W YDR113C YGL122C YHR152W YKL020C YLR080W
YKR069W	YHR152W YKL129C YMR109W
YLR016C	YBL076C YDL028C YGL122C YGL174W YHR152W YIR005W YLL036C YLR086W YNL189W YNR011C YPL031C
YLR132C	YBL045C YCL037C YDR477W YGR267C YHR135C YHR152W YJL187C YKR034W YLL036C YLR423C YNL286W YNL307C YPR191W
YNL134C	YCR102C YDR510W YGL122C YHR152W YIL066C YLL039C
YPL257W-B	YHR152W YLL039C
YPR118W	YDR346C YHR027C YHR152W YHR200W YJL217W
	GOID	Term	P-value	The genes annotated to this term
BP	GO:0009086	methionine biosynthetic process	0.000503427	YKR069W, YPR118W
	GO:0000097	sulfur amino acid biosynthetic process	0.000602962	YKR069W, YPR118W
CC	No terms were found for this aspect with a corrected P-value <= 0.05.
MF	No terms were found for this aspect with a corrected P-value <= 0.05.
Group 46 Density 0			P-value 0.0000664575003515543
members	partners
YBR120C	YBR017C YCL037C YGL122C YKR016W YKR026C YNL255C YPL215W
YBR227C	YGL122C YKR026C YML064C YPL129W
YHR047C	YDL238C YDR472W YKR026C YLL039C YLR148W YOL111C
YLR289W	YKR026C YLR097C YNL255C YOL133W YPL170W
YMR267W	YBR011C YGL122C YGL153W YGR239C YKR026C YNL154C
	GOID	Term	P-value	The genes annotated to this term
BP	GO:0045727	positive regulation of translation	0.000256718	YBR120C, YLR289W
CC	GO:0005759	mitochondrial matrix	0.000353557	YBR120C, YLR289W, YBR227C
	GO:0000313	organellar ribosome	0.00174768	YBR120C, YLR289W
	GO:0005761	mitochondrial ribosome	0.00174768	YBR120C, YLR289W
MF	GO:0043022	ribosome binding	6.64575e-05	YBR120C, YLR289W
	GO:0016462	pyrophosphatase activity	0.00243772	YLR289W, YBR227C, YMR267W
	GO:0016817	hydrolase activity, acting on acid anhydrides	0.00243772	YLR289W, YBR227C, YMR267W
Group 49 Density 0			P-value 0.00227757544691515
members	partners
YER159C	YBL032W YBR009C YDR397C YDR510W YER148W YGL122C YML065W YNL030W YNL255C YNR065C YOL012C YPL082C
YMR192W	YBL032W YCR009C YDR388W YFL005W YFR024C-A YHR016C YJL057C YLL039C YLR274W YNL112W YNL209W YNR065C YPL031C YPL240C YPL249C YPL249C-A YPR154W
YPL087W	YBR241C YBR290W YDL015C YDL035C YDR515W YGL122C YLL039C YML012W YNR065C YPL227C
	GOID	Term	P-value	The genes annotated to this term
BP	No terms were found for this aspect with a corrected P-value <= 0.05.
CC	GO:0044431	Golgi apparatus part	0.00227758	YMR192W, YPL087W
MF	No terms were found for this aspect with a corrected P-value <= 0.05.
Group 52 Density 0			P-value 5.21943715380355E-26
members	partners
YBR208C	YBR221C YDL029W YDL156W YDR328C YHR200W YJL098W YLL039C YNL177C YOL133W YOR117W
YBR280C	YBR139W YDL132W YDR054C YDR328C YEL060C YNL141W YOL133W
YDR131C	YDL043C YDL132W YDR328C YHR197W YIL063C YOL025W YOL133W YPL240C YPR093C
YDR306C	YBR200W YDL132W YDR328C YER043C YGL122C YKL085W YMR105C YNL138W YOL025W YOL133W YOR027W
YFL009W	YAR007C YBR083W YDL132W YDL155W YDR054C YDR132C YDR146C YDR328C YEL009C YER012W YFL031W YGL170C YHR005C YJL194W YKL159C YKL185W YLL039C YLR079W YOL025W YOL133W YOR057W YPL256C
YIL001W	YGL122C YOL133W
YJL149W	YAL032C YDL132W YDR328C YFR028C YGL209W YOL025W YOL133W
YJL204C	YAL026C YAL030W YBR010W YCR094W YDL132W YDR093W YDR328C YER031C YER166W YGL210W YLL039C YNL031C YOL133W
YLR097C	YDL047W YDL132W YDR328C YEL054C YFR004W YGL122C YLL039C YLR289W YMR303C YNL037C YNL255C YOL133W
YLR128W	YBL026W YCL037C YDL132W YDR139C YFR028C YLL039C YLR306W YOL025W YOL133W
YLR224W	YCL037C YDL132W YDR328C YGL122C YOL133W
YLR352W	YDL132W YDR328C YLL039C
YLR368W	YBR179C YDL132W YDR328C YGL219C YHR075C YHR102W YHR106W YJL048C YJR011C YMR048W YOL133W YPL022W YPR078C YPR093C
YML088W	YAL005C YBL032W YBR020W YBR031W YDL132W YDL140C YDL227C YDR328C YER054C YER143W YHR027C YIL095W YJL124C YLL024C YLL039C YML010W YNL255C YOL133W YOR151C YPL231W
YMR094W	YBR156C YCR106W YDL132W YDL192W YDR328C YGL122C YGR113W YGR140W YJR060W YJR089W YLL052C YMR168C YOL133W YOR057W YOR359W YPL240C
YNL311C	YBL032W YCR086W YDL007W YDL132W YDR190C YDR328C YGR175C YHR115C YIL074C YKL001C YLL039C YNL116W YOL133W YOR027W YOR259C
YOL025W	YDL132W YDR131C YDR139C YDR306C YDR328C YDR457W YFL009W YJL047C YJL149W YLL039C YLR128W YOL133W
	GOID	Term	P-value	The genes annotated to this term
BP	GO:0031146	SCF-dependent proteasomal ubiquitin-dependent protein catabolic process	2.74813e-23	YLR097C, YML088W, YDR131C, YBR280C, YNL311C, YLR368W, YLR224W, YDR306C, YJL149W, YFL009W
	GO:0019941	modification-dependent protein catabolic process	7.38685e-12	YLR097C, YML088W, YDR131C, YBR280C, YNL311C, YLR368W, YLR224W, YDR306C, YJL149W, YFL009W
	GO:0051597	response to methylmercury	5.45753e-07	YLR097C, YML088W, YLR224W
CC	GO:0019005	SCF ubiquitin ligase complex	5.21944e-26	YLR097C, YML088W, YDR131C, YBR280C, YNL311C, YLR368W, YLR224W, YDR306C, YJL149W, YFL009W, YLR352W
	GO:0031461	cullin-RING ubiquitin ligase complex	6.85359e-21	YLR097C, YML088W, YDR131C, YBR280C, YNL311C, YLR368W, YLR224W, YDR306C, YJL149W, YFL009W, YLR352W
MF	GO:0019787	small conjugating protein ligase activity	2.37315e-17	YLR097C, YML088W, YDR131C, YBR280C, YLR128W, YNL311C, YLR368W, YLR224W, YDR306C, YJL149W, YFL009W
	GO:0016881	acid-amino acid ligase activity	9.11547e-17	YLR097C, YML088W, YDR131C, YBR280C, YLR128W, YNL311C, YLR368W, YLR224W, YDR306C, YJL149W, YFL009W
	GO:0004842	ubiquitin-protein ligase activity	1.10736e-15	YLR097C, YML088W, YDR131C, YBR280C, YNL311C, YLR368W, YLR224W, YDR306C, YJL149W, YFL009W
Group 58 Density 0			P-value 0.00200685771338271
members	partners
YIL072W	YDL028C YLR263W YNL154C YOR351C YPR007C
YLR047C	YLL039C YOR351C
YMR323W	YGL087C YGR155W YOR351C
	GOID	Term	P-value	The genes annotated to this term
BP	GO:0006091	generation of precursor metabolites and energy	0.00287041	YLR047C, YMR323W
CC	No terms were found for this aspect with a corrected P-value <= 0.05.
MF	GO:0046872	metal ion binding	0.00200686	YLR047C, YIL072W, YMR323W
	GO:0043169	cation binding	0.00218384	YLR047C, YIL072W, YMR323W
Group 62 Density 0			P-value 0.00264914821027728
members	partners
YGR168C	YGL122C YKL101W YNL154C YPL209C
YIL057C	YGL122C YKL101W YLL039C YPL031C YPL150W
YLR011W	YDR515W YJL203W YKL101W YLR291C YOR028C
YMR285C	YDL229W YFR004W YHR082C YJL203W YJR059W YKL101W YNL154C YPR110C
YNL202W	YBR109C YKL101W YLL039C
	GOID	Term	P-value	The genes annotated to this term
BP	GO:0055114	oxidation-reduction process	0.00264915	YLR011W, YNL202W, YIL057C
CC	No terms were found for this aspect with a corrected P-value <= 0.05.
MF	No terms were found for this aspect with a corrected P-value <= 0.05.
Group 64 Density 0			P-value 0.000371751660649918
members	partners
YGR021W	YBL032W YBR059C YCL024W YDL108W YDR466W YGL122C YGL180W YHR135C YHR165C YKL048C YKL139W YNL255C YOL100W YOR231W
YJR097W	YCL024W YDL108W YDR466W YHR205W YJL095W YKL048C YNL092W YNL255C YOL100W YPL031C YPL141C
YKL181W	YBL068W YBR010W YBR274W YCL024W YCR084C YDR448W YDR466W YER099C YER151C YFR004W YGL059W YGR252W YHL011C YHR030C YJL164C YJL187C YJR059W YKL048C YLR055C YMR223W YMR291W YNL031C YNL183C YNL255C YOL061W YOL100W YOL128C YOR231W YOR244W YPL031C YPL204W
YLR060W	YBL076C YCL024W YDL015C YDL108W YDR466W YDR510W YER151C YFL022C YFR004W YFR014C YHR027C YHR200W YKL048C YKL139W YLL039C YNR051C YOL013C YOL100W YOR117W YOR231W YOR355W YPL031C YPR106W
	GOID	Term	P-value	The genes annotated to this term
BP	No terms were found for this aspect with a corrected P-value <= 0.05.
CC	No terms were found for this aspect with a corrected P-value <= 0.05.
MF	GO:0000287	magnesium ion binding	0.000371752	YKL181W, YLR060W
Group 66 Density 0			P-value 0.00108106672181267
members	partners
YIL151C	YBL032W YBL051C YDL028C YDR140W YKL171W YLR121C YPL204W
YKR096W	YBL032W YBL051C YDL028C YGL134W YGL179C YJL069C YPL204W YPR129W
YOR005C	YAL025C YCR014C YDR198C YDR225W YGL090W YGL111W YGL122C YGL146C YGR103W YHR052W YIL125W YKR081C YLR265C YLR304C YMR106C YMR224C YNL061W YNL110C YOR272W YPL110C YPR016C
	GOID	Term	P-value	The genes annotated to this term
BP	No terms were found for this aspect with a corrected P-value <= 0.05.
CC	No terms were found for this aspect with a corrected P-value <= 0.05.
MF	GO:0005524	ATP binding	0.00108107	YOR005C, YIL151C, YKR096W
	GO:0032559	adenyl ribonucleotide binding	0.001091	YOR005C, YIL151C, YKR096W
	GO:0030554	adenyl nucleotide binding	0.00110601	YOR005C, YIL151C, YKR096W
Group 72 Density 0			P-value 0.00040083112747445
members	partners
YCR044C	YCL037C YDR331W YDR515W YHR140W
YCR068W	YDR331W YFL062W YGL122C YIR033W YIR038C YNL111C
YIL170W	YDR331W
YJR158W	YBL032W YDR331W
YOR307C	YDR331W YHR082C YLR241W YML123C YMR058W YNL197C
	GOID	Term	P-value	The genes annotated to this term
BP	GO:0008643	carbohydrate transport	0.000501174	YJR158W, YIL170W
CC	GO:0016021	integral to membrane	0.000400831	YJR158W, YOR307C, YIL170W, YCR068W, YCR044C
	GO:0031224	intrinsic to membrane	0.000494028	YJR158W, YOR307C, YIL170W, YCR068W, YCR044C
MF	GO:0005215	transporter activity	0.00279643	YJR158W, YOR307C, YIL170W
Group 76 Density 0			P-value 0.0000022084081050556
members	partners
YBR236C	YDL140C YGL122C YGR063C YGR116W YML010W YOR151C
YPL228W	YCR084C YDL140C YDR404C YDR510W YGL122C YGL130W YML010W YOR224C YOR375C
YPR133C	YBR154C YDL140C YDR432W YDR510W YFL013C YGL122C YGR063C YGR116W YIL021W YIR010W YML010W YNL255C YOL005C YOR151C YOR290C YPL203W
	GOID	Term	P-value	The genes annotated to this term
BP	GO:0006370	mRNA capping	2.20841e-06	YPL228W, YBR236C
CC	No terms were found for this aspect with a corrected P-value <= 0.05.
MF	No terms were found for this aspect with a corrected P-value <= 0.05.
Group 81 Density 0			P-value 0.000324601507628878
members	partners
YBR197C	YHR079C YLR423C
YCL063W	YBR160W YEL013W YFR021W YLR423C YOR326W YPL240C
YDR022C	YGL122C YGL180W YGL237C YJL165C YLR423C YPL166W
YDR374C	YGL122C YIL051C YLR423C YNR052C YOR231W
YIL092W	YBL032W YGL122C YLR423C YMR109W
YJL048C	YBR273C YDL126C YKL130C YKL213C YLR368W YLR423C YPR120C
YJR003C	YDR448W YDR480W YJL112W YLR423C YPL049C YPR173C
YJR156C	YGL122C YGR086C YLR423C
YKL050C	YBL032W YDL099W YGL105W YLR423C YNL255C
YML043C	YBL014C YJL025W YLR423C YNL197C YNL199C
YOR226C	YCL037C YLR423C YNL197C YPL088W
YPL159C	YJR091C YLR423C
	GOID	Term	P-value	The genes annotated to this term
BP	No terms were found for this aspect with a corrected P-value <= 0.05.
CC	No terms were found for this aspect with a corrected P-value <= 0.05.
MF	GO:0003674	molecular_function	0.000324602	YJR003C, YKL050C, YDR022C, YCL063W, YOR226C, YPL159C, YDR374C, YJL048C, YJR156C, YBR197C, YIL092W, YML043C
Group 82 Density 0			P-value 8.19447662143811E-06
members	partners
YDL018C	YBR031W YGL122C YGL200C YHR110W YML012W
YDR107C	YAR014C YCR007C YGL200C YLL039C YMR070W
YKL096W-A	YGL122C YGL200C YJL057C YKL028W YML086C
YLR120C	YBL026W YBL032W YGL200C
YLR390W-A	YBL032W YGL200C YLL039C
	GOID	Term	P-value	The genes annotated to this term
BP	GO:0031505	fungal-type cell wall organization	0.000143499	YLR390W-A, YKL096W-A, YLR120C
	GO:0045229	external encapsulating structure organization	0.000276607	YLR390W-A, YKL096W-A, YLR120C
CC	GO:0031225	anchored to membrane	8.19448e-06	YLR390W-A, YKL096W-A, YLR120C
	GO:0009277	fungal-type cell wall	3.98677e-05	YLR390W-A, YKL096W-A, YLR120C
	GO:0030312	external encapsulating structure	4.59684e-05	YLR390W-A, YKL096W-A, YLR120C
MF	GO:0005199	structural constituent of cell wall	5.13413e-05	YLR390W-A, YKL096W-A
Group 85 Density 0			P-value 2.19018659294301E-08
members	partners
YAL023C	YAL007C YAR002C-A YAR027W YBR159W YCL037C YCL043C YCR043C YDL093W YDL095W YDL126C YDR057W YDR411C YGL200C YHR200W YKL130C YLL039C YML012W YML029W YML130C YNL074C YOL013C YPL026C
YHR123W	YAR002C-A YBR023C YBR106W YBR159W YBR295W YCL037C YCR034W YCR043C YDL192W YGL200C YGR060W YHR007C YIR038C YKL065C YLR372W YML012W YNL130C YPL094C YPL227C YPL240C YPL246C
YMR123W	YAR002C-A YBL075C YDL053C YDR174W YDR381W YGL122C YGR105W YHR007C YKR081C YLR064W YML012W
YNL130C	YAL007C YAR002C-A YBR106W YBR159W YDR515W YER039C YGL200C YGR295C YHL048W YHR007C YHR110W YHR123W YIL114C YML012W YML016C YMR149W YNL125C YNL336W YOR016C YOR067C YPL246C
YOR165W	YAR002C-A YBR106W YGR284C YHR007C YJL014W YKL207W YLL039C YML012W YMR292W YPR028W YPR113W
YPL186C	YAL008W YAR002C-A YGL122C YHR003C YLL039C YML012W YML086C YMR149W
	GOID	Term	P-value	The genes annotated to this term
BP	GO:0006657	CDP-choline pathway	4.41497e-06	YNL130C, YHR123W
	GO:0006656	phosphatidylcholine biosynthetic process	4.03523e-05	YNL130C, YHR123W
	GO:0046470	phosphatidylcholine metabolic process	5.7179e-05	YNL130C, YHR123W
CC	GO:0005789	endoplasmic reticulum membrane	2.19019e-08	YPL186C, YOR165W, YNL130C, YMR123W, YAL023C, YHR123W
	GO:0042175	nuclear outer membrane-endoplasmic reticulum membrane network	2.7477e-08	YPL186C, YOR165W, YNL130C, YMR123W, YAL023C, YHR123W
	GO:0005792	microsome	0.000316622	YNL130C, YHR123W
MF	GO:0004142	diacylglycerol cholinephosphotransferase activity	7.36444e-07	YNL130C, YHR123W
	GO:0017169	CDP-alcohol phosphatidyltransferase activity	7.35521e-06	YNL130C, YHR123W
	GO:0016780	phosphotransferase activity, for other substituted phosphate groups	6.6681e-05	YNL130C, YHR123W
Group 89 Density 0			P-value 0.00079274877002004
members	partners
YDL103C	YCL037C YDL229W YDR288W YDR515W YFR004W YGL122C YGL158W YGL245W YJL006C YJL057C YKL139W YKL168C YOL045W YOR351C YPL031C YPL106C YPR106W
YDR256C	YBR261C YER125W YGL122C YGL153W YGR040W YJL006C YLL039C YLR291C YMR033W YNL189W YNR031C YOL045W YOR351C YPL031C YPL070W YPL150W
YGR180C	YDR151C YDR466W YER070W YFL010C YFR004W YFR014C YGL016W YGL058W YGL122C YGR040W YGR052W YHR027C YHR082C YHR200W YJL006C YJL026W YJL057C YJL115W YJL168C YJR017C YKL012W YKL168C YLL039C YLR136C YLR347C YLR437C YNL189W YOL045W YOR229W YOR230W YOR244W YPL031C YPL191C YPL240C YPR106W YPR152C
YJR070C	YDL225W YDR398W YEL034W YER090W YFR004W YGL137W YGR040W YIL142W YJL006C YJL057C YKL101W YKL139W YOL045W YOL100W YOR351C YPL031C
YKL091C	YCL024W YDR477W YGL122C YJL006C YJL141C YKL168C YLL039C YMR079W YNL154C YPL209C
YMR041C	YBL032W YER125W YGL207W YGR040W YIL030C YJL006C YKL139W YOL045W YOL100W YOL128C YOR351C
YNR033W	YFR014C YGR040W YIL030C YJL006C YJR017C YKL012W YKL168C YNL249C YNL255C YNL307C YOL045W YOR244W YOR351C YPL031C YPR152C YPR154W
YNR064C	YFR014C YGL122C YJL006C YLR096W YOL045W YOL108C YOR351C YPL031C
YOR335C	YBR055C YDL229W YDR322C-A YER125W YFR004W YGL158W YHR027C YHR082C YHR200W YIL030C YJL006C YJL057C YJL106W YKL101W YKL168C YLL039C YLR291C YNL135C YNL244C YNL307C YOL013C YOL045W YOR117W YOR244W YOR351C YPL209C YPR106W YPR111W
YPL077C	YDL156W YDR388W YDR448W YDR489W YER125W YGL059W YGL122C YGR120C YGR241C YHR030C YHR161C YJL006C YJL164C YJR059W YKL139W YLR423C YMR139W YNL183C YNL307C YOL045W YOL100W YOR351C YPL203W YPR106W
YPR035W	YBR126C YDR171W YER151C YFR004W YFR014C YGL122C YGL179C YGR040W YHR027C YHR200W YIL030C YIR037W YJL006C YKL168C YLL039C YLR048W YMR236W YNL288W YNR051C YOL045W YOR117W YOR351C YPL031C
	GOID	Term	P-value	The genes annotated to this term
BP	GO:0006541	glutamine metabolic process	0.000792749	YPR035W, YNR033W
	GO:0042398	cellular modified amino acid biosynthetic process	0.000925773	YNR033W, YJR070C
CC	No terms were found for this aspect with a corrected P-value <= 0.05.
MF	GO:0016491	oxidoreductase activity	0.00193581	YMR041C, YGR180C, YDR256C, YJR070C
Group 90 Density 0			P-value 0.000118924759760337
members	partners
YEL005C	YDR357C YEL013W YGL079W YGL122C YLR408C YNL086W
YJL036W	YAL030W YDL113C YDL226C YDR425W YDR446W YEL051W YER127W YER157W YGL122C YGL198W YGL223C YGL233W YGR097W YGR113W YGR120C YGR142W YIL084C YLL039C YLR031W YLR423C YLR424W YNL041C YNL086W YOR057W YOR132W YPL174C YPL201C YPR105C
YKL061W	YDR357C YDR400W YGL079W YGL122C YGR119C YJL164C YJR059W YLR362W YLR408C YNL086W YNL122C YNL255C
YPR185W	YBL032W YEL013W YGL122C YGL180W YGR120C YGR253C YHR128W YJR066W YLR423C YNL086W
	GOID	Term	P-value	The genes annotated to this term
BP	GO:0000422	mitochondrion degradation	0.000118925	YPR185W, YJL036W
	GO:0034727	piecemeal microautophagy of nucleus	0.000154531	YPR185W, YJL036W
	GO:0032258	CVT pathway	0.000184268	YPR185W, YJL036W
CC	GO:0005768	endosome	0.00282372	YKL061W, YJL036W
MF	No terms were found for this aspect with a corrected P-value <= 0.05.
Group 92 Density 0			P-value 0.000981727818762935
members	partners
YDR222W	YCR106W YLL039C
YEL072W	YCR106W
YGL247W	YCR106W YHR036W YNL255C YOR103C
YHL017W	YDR284C YHR188C YIL111W YJL004C
YJL077W-B	YCR106W YNL255C
YPL034W	YCR106W
	GOID	Term	P-value	The genes annotated to this term
BP	GO:0008150	biological_process	0.00130445	YDR222W, YPL034W, YJL077W-B, YHL017W, YGL247W, YEL072W
CC	No terms were found for this aspect with a corrected P-value <= 0.05.
MF	GO:0003674	molecular_function	0.000981728	YDR222W, YPL034W, YJL077W-B, YHL017W, YGL247W, YEL072W
Group 93 Density 0			P-value 1.11536005968171E-32
members	partners
YBR078W	YBL032W YJR066W YKL203C YLL039C YOL133W
YDR033W	YBL032W YER151C YFR004W YGL122C YHR027C YHR200W YIR010W YJR010C-A YJR066W YKL203C YLL039C YNL197C YNL251C YNR051C YOR153W
YDR038C	YBL032W YJR066W YKL203C YLL039C YNL197C YNL217W YOR016C
YDR039C	YBL032W YBR052C YBR183W YJR066W YKL203C YLL039C YLR332W YNL197C YPL058C YPR201W
YDR040C	YJR066W YKL203C YLL039C YNL197C
YDR093W	YBL002W YBL032W YBR160W YDL156W YDR224C YER166W YJL204C YJR066W YKL203C YLL039C YLR332W YMR054W YNL323W
YDR343C	YBL036C YDR331W YER125W YER171W YGL122C YGR040W YGR060W YJR017C YJR066W YKL193C YKL203C YLL039C YLR019W YNL032W YOL100W YOR181W
YDR345C	YER151C YFR004W YGL122C YHR027C YHR200W YJR066W YKL117W YKL203C YLL006W YLL039C YNR051C
YEL040W	YBL032W YDR272W YJR066W YKL203C YNL197C
YER040W	YBL032W YCL010C YDL155W YDR477W YEL009C YER118C YGL167C YGR218W YGR252W YJR066W YKL203C YMR139W YNL103W YNL189W YNL229C YPL153C
YFL021W	YBL032W YIR010W YJR066W YKL161C YML065W YNL229C YPL190C YPL240C
YFL026W	YBL032W YGL089C YGL206C YGR037C YHR005C YIL068C YJR066W YKL178C YKL203C YLL039C YNL197C YNL217W YNL307C YOR212W YPL187W YPL189W
YGR032W	YAR018C YBL003C YBR010W YDL230W YDR225W YFR004W YIL043C YJR066W YKL203C YLL039C YNL031C YNL161W YNL255C YNL298W YPR054W
YHR092C	YGL122C YJR066W YKL203C YLL039C YLR292C YPR194C
YKR093W	YJR066W YKL203C YLL039C YOR153W YPR079W
YLR108C	YAR014C YDR100W YJR066W YML102W
YLR214W	YAR027W YER005W YER026C YFL040W YGL122C YJR066W YKL203C YKR104W YLL039C YMR026C YMR054W
YML052W	YAR014C YBR021W YCL037C YEL063C YHR077C YJR066W YKL203C YLL039C YLR191W YOR153W
YMR011W	YBL032W YDL222C YGL051W YGL077C YGL203C YGR055W YHR094C YJR066W YKL203C YLL039C YML048W YML072C
YMR028W	YDL047W YDL134C YDL188C YDR075W YDR188W YIL153W YJL111W YJR065C YJR066W YKL203C YLL039C YNL255C YNR032W YOR244W YPL152W YPR040W
YMR307W	YAL053W YDL042C YDR057W YFL025C YGL200C YJL034W YJR066W YKL203C YKR039W YLL039C YLR442C YML012W YPL204W YPL240C
YNL192W	YAL053W YBL032W YCR012W YDR231C YGL122C YGL179C YGR252W YHR048W YHR079C YHR082C YHR174W YJL187C YJR066W YKL203C YLL039C YNL154C YPL204W
YOL030W	YAR027W YBL032W YBR106W YCR034W YDR510W YJR066W YKL203C YLL023C YLL039C YMR127C
YOR008C	YBL007C YBL032W YBR160W YJL034W YJR066W YKL203C YLR371W YNL121C YNL251C
YOR035C	YAL029C YBR109C YGL106W YGL122C YHR023W YHR082C YJR066W YKL129C YKL203C YLL039C YMR109W YOR326W YPL240C
YPL249C	YBL026W YCR009C YDR388W YEL046C YFR024C-A YHR016C YJR066W YKL203C YMR192W YOR326W YPL031C YPR154W
YPR124W	YBR106W YBR159W YBR274W YCR021C YDL128W YGL122C YGL137W YJR066W YKL065C YKL203C YLL039C YNL029C YOR311C
YPR149W	YBL032W YEL013W YFR004W YGL122C YJR066W YKL203C YLL039C YNL197C YOR153W YOR270C
	GOID	Term	P-value	The genes annotated to this term
BP	GO:0008645	hexose transport	2.96435e-06	YMR011W, YHR092C, YDR345C, YDR343C
	GO:0015749	monosaccharide transport	2.96435e-06	YMR011W, YHR092C, YDR345C, YDR343C
	GO:0055085	transmembrane transport	7.16733e-06	YMR011W, YPR124W, YDR343C, YDR040C, YDR038C, YDR345C, YHR092C, YDR039C, YLR214W
CC	GO:0005624	membrane fraction	1.11536e-32	YPR149W, YMR011W, YPR124W, YEL040W, YKR093W, YML052W, YOL030W, YOR008C, YDR040C, YHR092C, YDR345C, YMR028W, YBR078W, YDR343C, YMR307W, YPL249C, YNL192W, YDR038C, YGR032W, YDR093W, YDR033W, YFL026W, YDR039C, YLR214W
	GO:0005626	insoluble fraction	1.11536e-32	YPR149W, YMR011W, YPR124W, YEL040W, YKR093W, YML052W, YOL030W, YOR008C, YDR040C, YHR092C, YDR345C, YMR028W, YBR078W, YDR343C, YMR307W, YPL249C, YNL192W, YDR038C, YGR032W, YDR093W, YDR033W, YFL026W, YDR039C, YLR214W
	GO:0001950	plasma membrane enriched fraction	5.46133e-08	YPR149W, YBR078W, YDR040C, YDR343C, YDR038C, YMR307W, YDR033W
MF	GO:0008554	sodium-exporting ATPase activity, phosphorylative mechanism	7.56179e-08	YDR040C, YDR038C, YDR039C
	GO:0022892	substrate-specific transporter activity	2.15862e-07	YMR011W, YPR124W, YDR343C, YKR093W, YDR040C, YDR038C, YDR345C, YHR092C, YDR033W, YDR093W, YDR039C
	GO:0005353	fructose transmembrane transporter activity	3.91269e-07	YMR011W, YHR092C, YDR345C, YDR343C
Group 94 Density 0			P-value 0.000107225972580469
members	partners
YBR098W	RP5-875J14.1 YBR160W YDR386W YFR024C-A YGL066W YGL122C YGR252W YHR016C YKL113C
YBR205W	YBL007C YBR017C YBR031W YDR170C YDR346C YER110C YFL038C YFR024C-A YGL122C YGL212W YHL031C YHR016C YHR105W YHR114W YHR181W YIR038C YLL039C YLR026C YLR378C YML012W YML115C YOL018C YPR107C
YBR239C	YBL032W YDR388W YFR024C-A YGL122C YHR016C YNL197C YPL133C
YCL008C	YBL007C YBL032W YDR069C YDR517W YFR024C-A YGL045W YGR206W YHL002W YHR016C YJL172W YLL039C YLR119W YLR191W YLR417W YMR032W YNL154C YNR006W YPL065W YPL084W
YCL034W	YBL007C YCL037C YDR515W YGL122C YHR016C YHR114W YLL039C YNL255C YOR094W YOR181W
YDL146W	YBL007C YFR024C-A YHR016C YHR114W YKL070W
YDR261C	YFR024C-A YHR016C YPL240C
YGL238W	YBL007C YBR081C YDL087C YDR170C YDR439W YFL037W YFR024C-A YGL122C YGR214W YHR114W YIL094C YLL039C YLR293C YLR340W YNL189W YNL236W YOR185C
YGR227W	YBL007C YBL032W YFR024C-A YHR016C YHR114W
YGR268C	YBL007C YBL032W YDL239C YDR330W YDR388W YER125W YFR024C-A YHL002W YHR016C YLL039C YLR206W YNL255C YOR042W YOR124C YOR138C YPL049C
YIL156W	YBL007C YBL032W YDR247W YDR388W YDR477W YER118C YFR024C-A YGL179C YGL180W YHL002W YHL007C YHR016C YHR114W YHR124W YHR135C YJL020C YJL164C YJR059W YKL129C YLL039C YLR014C YLR191W YMR032W YMR109W YMR216C YNL154C YOR181W YPL031C YPL209C YPR154W
YJL004C	YBL007C YCR008W YCR024C-A YCR028C YDL199C YDR414C YER005W YFR024C-A YHL017W YHR016C YIL109C YJR022W YKR088C YLR083C YLR241W YML038C YNL044W YNL121C YPL051W YPL264C YPR181C
YJL201W	YBL007C YBL032W YFR024C-A YGL122C YHR016C
YJR083C	YBR160W YDR388W YDR507C YFR024C-A YGL115W YGL122C YHR016C YLR295C
YKR030W	YBL007C YEL022W YER031C YFR024C-A YGL122C YHR016C YHR114W YJR031C
YLL005C	YBL007C YBR291C YDR283C YDR523C YGR060W YHR016C YHR114W YHR198C YKR078W YML075C
YLR064W	YBL007C YBL032W YGL122C YHR016C YHR114W YMR123W
YLR206W	YAL041W YBL007C YBL032W YBL106C YBR059C YCR030C YDR379W YER125W YFR024C-A YGL122C YGL206C YGR268C YHL007C YHR016C YIL095W YJL020C YKR036C YLL039C YML051W YNL020C YOL111C YPL115C
YLR426W	YBR017C YHR016C YHR114W YPL151C
YMR232W	YCR009C YFR024C-A YHR114W YLR229C
YMR253C	YBL007C YFR024C-A YGL122C YHR114W YLL039C
YMR313C	YBL007C YBR041W YBR230C YDL065C YHR016C YHR114W YIL062C YIL124W YKL012W YPL031C
YNL176C	YBL007C YBL032W YDR388W YFR024C-A YGL122C YGR090W YLL039C YNL197C
YOR109W	YBL007C YBR260C YCL037C YDR100W YFR004W YFR024C-A YGL122C YGL206C YHR016C YHR108W YHR114W YIR010W YJL124C YKL135C YLL039C YMR012W YPR029C YPR171W
YOR247W	YBL032W YFR024C-A YHR016C YKL129C YKL130C YLR223C YMR109W
YOR284W	YAL048C YAR014C YBL007C YBR261C YCR088W YDR212W YDR388W YFR024C-A YGR261C YHL004W YHR016C YJL025W YLL039C YLR227C YLR291C YML064C YMR309C YNL189W YNL243W YNL286W YNL288W YOL034W
YPL249C	YBL026W YCR009C YDR388W YEL046C YFR024C-A YHR016C YJR066W YKL203C YMR192W YOR326W YPL031C YPR154W
YPR081C	YBL002W YBR010W YDR224C YDR388W YFR024C-A YGR136W YHR016C YNL031C YPR034W YPR154W
YPR097W	YFR024C-A
	GOID	Term	P-value	The genes annotated to this term
BP	No terms were found for this aspect with a corrected P-value <= 0.05.
CC	GO:0030479	actin cortical patch	0.000107226	YCL034W, YDL146W, YOR109W, YLR206W
	GO:0030864	cortical actin cytoskeleton	0.00018089	YCL034W, YDL146W, YOR109W, YLR206W
MF	No terms were found for this aspect with a corrected P-value <= 0.05.
Group 95 Density 0			P-value 0.0000022447845701262
members	partners
At5g44740	YBR088C
YBL019W	YBR088C YCR020W-B YCR028C-A
YER041W	YBR088C YBR160W YDR510W YHR027C YKR081C YLR449W YPR120C
YGR263C	YLR433C YMR070W YMR263W
YGR286C	YKR064W YMR070W
YHR031C	YBR088C YKL054C YLR248W YNL261W YNL262W
YLL002W	YBR009C YBR010W YBR088C YBR160W YGL122C YJL115W YKR048C YNL030W YNL031C YNL246W YPL015C
YML021C	YBR088C
	GOID	Term	P-value	The genes annotated to this term
BP	GO:0006281	DNA repair	2.24478e-06	YLL002W, YER041W, YHR031C, YML021C, YBL019W
	GO:0006974	response to DNA damage stimulus	4.91238e-06	YLL002W, YER041W, YHR031C, YML021C, YBL019W
	GO:0006284	base-excision repair	0.000156432	YML021C, YBL019W
CC	No terms were found for this aspect with a corrected P-value <= 0.05.
MF	GO:0004536	deoxyribonuclease activity	0.00047221	YER041W, YBL019W
	GO:0003824	catalytic activity	0.000950443	YLL002W, YER041W, YHR031C, YGR263C, YML021C, YBL019W, YGR286C
	GO:0016787	hydrolase activity	0.00157443	YER041W, YHR031C, YGR263C, YML021C, YBL019W
Group 98 Density 0			P-value 0.000797408351397716
members	partners
YDR191W	YGL122C YOL113W
YGL162W	YBL032W YBR112C YDL197C YHL007C YLR035C YNL197C YNL298W YOL113W
YIR039C	YDL229W YOL113W
YKL184W	YJR059W YNL255C YOL113W YPL026C YPL052W
YMR210W	YJL164C YKL142W YLL039C YOL113W
	GOID	Term	P-value	The genes annotated to this term
BP	GO:0006631	fatty acid metabolic process	0.000797408	YMR210W, YDR191W
CC	No terms were found for this aspect with a corrected P-value <= 0.05.
MF	No terms were found for this aspect with a corrected P-value <= 0.05.
Group 99 Density 0			P-value 0.000275364346662471
members	partners
YDR381C-A	YDL208W YGL122C
YNR067C	YBL032W YDL100C YDL208W YNL197C
YOL008W	YDL208W
snR19	YDL208W YKL012W YPL190C
snR32	YDL208W YPL190C
snR42	YDL208W YNL251C
	GOID	Term	P-value	The genes annotated to this term
BP	GO:0031118	rRNA pseudouridine synthesis	0.00036072	snR32, snR42
CC	GO:0031429	box H/ACA snoRNP complex	0.000383831	snR32, snR42
MF	GO:0030558	RNA pseudouridylation guide activity	0.000275364	snR32, snR42
	GO:0030559	rRNA pseudouridylation guide activity	0.000275364	snR32, snR42
Group 100 Density 0			P-value 0.0000133864731817994
members	partners
YBR168W	YDL065C YER021W YGL122C YHR150W YLR324W YML008C
YDL089W	YBR160W YCR086W YDR233C YDR439W YGL122C YJL076W YLR324W YML008C YML034W YPR028W
YGR004W	YDR515W YGL122C YHR114W YLR324W YML008C YPR028W
	GOID	Term	P-value	The genes annotated to this term
BP	GO:0007031	peroxisome organization	0.000323444	YBR168W, YGR004W
CC	GO:0005779	integral to peroxisomal membrane	1.33865e-05	YBR168W, YGR004W
	GO:0031231	intrinsic to peroxisomal membrane	1.33865e-05	YBR168W, YGR004W
	GO:0031903	microbody membrane	7.75166e-05	YBR168W, YGR004W
MF	GO:0003674	molecular_function	0.0313806	YBR168W, YGR004W, YDL089W
Group 106 Density 0			P-value 0.000607820846109678
members	partners
YDR123C	YBR160W YHL020C YJL168C YJR060W YKL135C YLL039C YML051W YOL108C YPL248C YPR086W
YHL020C	YBR112C YBR233W-A YCR073C YDL072C YDR123C YER120W YFL008W YGL122C YGL158W YIL035C YKL065C YKL166C YLL039C YNL255C YOL004W YOL108C YOR061W
YKL017C	YOL108C
YLR422W	YFR024C-A YGL122C YLL039C YOL108C
YMR317W	YBL032W YNL255C YOL108C
YOL067C	YBL103C YER148W YML051W YOL108C
	GOID	Term	P-value	The genes annotated to this term
BP	GO:0045944	positive regulation of transcription from RNA polymerase II promoter	0.000607821	YOL067C, YDR123C, YHL020C
CC	No terms were found for this aspect with a corrected P-value <= 0.05.
MF	GO:0003677	DNA binding	0.000931519	YOL067C, YDR123C, YKL017C, YHL020C
Group 107 Density 0			P-value 0.000710565921529601
members	partners
YDR518W	YGL122C YHR113W YNL307C
YNL125C	YAR027W YBR106W YEL063C YGL180W YGR092W YHR135C YJL095W YJL164C YJL187C YJR059W YMR149W YNL130C YNL154C YNL197C YNR059W YPL076W YPL141C YPL240C
YNL336W	YBR106W YNL130C
YOR067C	YNL130C
	GOID	Term	P-value	The genes annotated to this term
BP	No terms were found for this aspect with a corrected P-value <= 0.05.
CC	GO:0044432	endoplasmic reticulum part	0.000710566	YDR518W, YOR067C, YNL125C
MF	No terms were found for this aspect with a corrected P-value <= 0.05.
Group 113 Density 0			P-value 8.16218451092088E-21
members	partners
TT(AGU)B	YKL194C
TT(AGU)C	YKL194C
TT(AGU)D	YKL194C
TT(AGU)H	YKL194C
TT(AGU)I1	YKL194C
TT(AGU)I2	YKL194C
TT(AGU)J	YKL194C
TT(AGU)N1	YKL194C
TT(AGU)N2	YKL194C
TT(AGU)O1	YKL194C
TT(AGU)O2	YKL194C
TT(UGU)G1	YKL194C
TT(UGU)G2	YKL194C
TT(UGU)H	YKL194C
TT(UGU)P	YKL194C
	GOID	Term	P-value	The genes annotated to this term
BP	GO:0006414	translational elongation	2.54579e-20	TT(AGU)C, TT(AGU)J, TT(AGU)B, TT(AGU)O2, TT(UGU)H, TT(AGU)H, TT(AGU)I1, TT(AGU)O1, TT(AGU)D, TT(UGU)G2, TT(UGU)G1, TT(AGU)N1, TT(UGU)P, TT(AGU)I2, TT(AGU)N2
	GO:0034645	cellular macromolecule biosynthetic process	2.90823e-10	TT(AGU)C, TT(AGU)J, TT(AGU)B, TT(AGU)O2, TT(UGU)H, TT(AGU)H, TT(AGU)I1, TT(AGU)O1, TT(AGU)D, TT(UGU)G2, TT(UGU)G1, TT(AGU)N1, TT(UGU)P, TT(AGU)I2, TT(AGU)N2
CC	GO:0005829	cytosol	3.80315e-15	TT(AGU)C, TT(AGU)J, TT(AGU)B, TT(AGU)O2, TT(UGU)H, TT(AGU)H, TT(AGU)I1, TT(AGU)O1, TT(AGU)D, TT(UGU)G2, TT(UGU)G1, TT(AGU)N1, TT(UGU)P, TT(AGU)I2, TT(AGU)N2
	GO:0044444	cytoplasmic part	1.14319e-05	TT(AGU)C, TT(AGU)J, TT(AGU)B, TT(AGU)O2, TT(UGU)H, TT(AGU)H, TT(AGU)I1, TT(AGU)O1, TT(AGU)D, TT(UGU)G2, TT(UGU)G1, TT(AGU)N1, TT(UGU)P, TT(AGU)I2, TT(AGU)N2
MF	GO:0000499	base pairing with mRNA	8.16218e-21	TT(AGU)C, TT(AGU)J, TT(AGU)B, TT(AGU)O2, TT(UGU)H, TT(AGU)H, TT(AGU)I1, TT(AGU)O1, TT(AGU)D, TT(UGU)G2, TT(UGU)G1, TT(AGU)N1, TT(UGU)P, TT(AGU)I2, TT(AGU)N2
	GO:0030533	triplet codon-amino acid adaptor activity	8.16218e-21	TT(AGU)C, TT(AGU)J, TT(AGU)B, TT(AGU)O2, TT(UGU)H, TT(AGU)H, TT(AGU)I1, TT(AGU)O1, TT(AGU)D, TT(UGU)G2, TT(UGU)G1, TT(AGU)N1, TT(UGU)P, TT(AGU)I2, TT(AGU)N2
	GO:0060090	binding, bridging	8.00635e-20	TT(AGU)C, TT(AGU)J, TT(AGU)B, TT(AGU)O2, TT(UGU)H, TT(AGU)H, TT(AGU)I1, TT(AGU)O1, TT(AGU)D, TT(UGU)G2, TT(UGU)G1, TT(AGU)N1, TT(UGU)P, TT(AGU)I2, TT(AGU)N2
Group 114 Density 0			P-value 8.09326461287759E-06
members	partners
YHR071W	YGR233C YLL039C YPL031C
YIL050W	YBR160W YDL229W YDR140W YER111C YGL050W YGR233C YJL084C YLR190W YML065W YPL031C
YML014W	YBR059C YGR233C YNL255C YNR046W
	GOID	Term	P-value	The genes annotated to this term
BP	GO:0031647	regulation of protein stability	8.09326e-06	YIL050W, YHR071W
	GO:0051338	regulation of transferase activity	0.000217513	YIL050W, YHR071W
	GO:0001932	regulation of protein phosphorylation	0.000267877	YIL050W, YHR071W
CC	GO:0000307	cyclin-dependent protein kinase holoenzyme complex	1.99999e-05	YIL050W, YHR071W
MF	GO:0019900	kinase binding	3.71823e-05	YIL050W, YHR071W
	GO:0016538	cyclin-dependent protein kinase regulator activity	4.77488e-05	YIL050W, YHR071W
Group 115 Density 8.888889e-02			P-value 3.04030942850749E-09
members	partners
YDL077C	YAL002W YBR131W YBR200W YDR080W YDR495C YGL124C YGL210W YGL212W YKL196C YKR014C YLR093C YLR148W YLR262C YLR396C YML001W YML121W YMR197C YMR231W YNL147W YNL304W YOL013C YOR051C YOR089C YOR106W YPL045W YPL195W
YER136W	YBR177C YBR264C YER031C YFL005W YFL038C YFR004W YGL122C YGL210W YJR035W YKR014C YLL039C YLR262C YLR362W YML001W YNL093W YNL135C YNL304W YOR089C
YGL198W	YBR264C YCL037C YDL226C YDR084C YDR425W YER031C YFL005W YFL038C YGL161C YGL210W YGR172C YHR105W YJL036W YKR014C YLL039C YLR262C YML001W YNL255C YNL263C YNL304W YOR132W YPL095C
YGR172C	YBL106C YBR159W YDL113C YDL226C YDL232W YER031C YER074W-A YFL005W YFL038C YGL161C YGL198W YGL212W YHR105W YKR014C YLR078C YLR262C YLR452C YML001W YNL093W YNL263C YOL103W YOR089C YOR132W YOR357C YPL018W YPL095C YPR028W
YMR258C	YAR014C YDR328C YKR014C YNL093W YOR089C
YNL044W	YAR002C-A YAR014C YBR036C YBR261C YBR264C YCL037C YDL164C YDR137W YDR233C YDR244W YDR331W YDR414C YDR515W YER005W YER031C YFL005W YFL038C YFR004W YGL153W YGL210W YGR177C YGR260W YHR027C YHR105W YHR140W YHR200W YJL004C YJL196C YKR014C YLL023C YLL039C YLR026C YLR262C YLR291C YML064C YMR215W YNL093W YNL189W YNL263C YNL304W YNL315C YOL018C YOR089C YPL070W
YNL263C	YAR002C-A YAR027W YBR264C YDL113C YDR479C YER031C YER074W-A YFL005W YFL038C YGL059W YGL122C YGL198W YGL210W YGL212W YGR142W YGR172C YGR177C YHR105W YIR033W YIR038C YKL166C YKR014C YLL039C YLR026C YLR262C YML001W YML110C YNL044W YNL093W YNL304W YOR069W YOR089C YOR132W YOR357C YPL031C YPL203W YPR028W
YOL112W	YER149C YFL005W YGL122C YHL007C YKL101W YLL021W YLR229C YLR262C YLR319C YML001W YNL255C YNL271C
YOR070C	YBL032W YFL005W YFL038C YGL210W YHR135C YJL164C YJR059W YLL039C YLR377C YML001W YMR138W YOR089C
YOR370C	YBL032W YBR264C YCL037C YER114C YFL005W YFL038C YGL122C YJL030W YJL031C YKR014C YLR262C YLR403W YML001W YML051W YNL006W YNL093W YOR089C YOR347C YOR375C YPR176C
	GOID	Term	P-value	The genes annotated to this term
BP	GO:0016192	vesicle-mediated transport	5.13347e-09	YOR370C, YOR070C, YNL263C, YGR172C, YER136W, YMR258C, YDL077C, YNL044W
	GO:0033124	regulation of GTP catabolic process	1.07002e-07	YOR070C, YOL112W, YOR370C, YMR258C
	GO:0032851	positive regulation of Rab GTPase activity	6.04876e-07	YOR070C, YOL112W, YOR370C
CC	GO:0044431	Golgi apparatus part	3.58804e-06	YOR070C, YGL198W, YNL263C, YGR172C, YNL044W
	GO:0030134	ER to Golgi transport vesicle	2.27023e-05	YNL263C, YGR172C, YNL044W
	GO:0016023	cytoplasmic membrane-bounded vesicle	2.95146e-05	YNL263C, YGR172C, YMR258C, YNL044W
MF	GO:0030695	GTPase regulator activity	3.04031e-09	YOR070C, YOL112W, YOR370C, YMR258C, YER136W, YDL077C
	GO:0060589	nucleoside-triphosphatase regulator activity	8.09238e-09	YOR070C, YOL112W, YOR370C, YMR258C, YER136W, YDL077C
	GO:0005096	GTPase activator activity	6.76023e-07	YOR070C, YOL112W, YOR370C, YER136W
Group 123 Density 0			P-value 5.29851751973823E-06
members	partners
YBR168W	YDL065C YER021W YGL122C YHR150W YLR324W YML008C
YDR275W	YER021W YPR183W
YEL057C	YER021W
YFR055W	YAR071W
YGL027C	YER021W YML058W-A YNR002C
YGR102C	YAL035W YBL080C YDR515W YGL122C
YKL100C	YER021W YLL039C YMR170C
YKL132C	YER021W YGL122C YPR022C
YMR293C	YBL080C YER021W
	GOID	Term	P-value	The genes annotated to this term
BP	GO:0070681	glutaminyl-tRNAGln biosynthesis via transamidation	5.29852e-06	YMR293C, YGR102C
	GO:0006520	cellular amino acid metabolic process	0.000421548	YFR055W, YMR293C, YGR102C, YKL132C
	GO:0044106	cellular amine metabolic process	0.000518896	YFR055W, YMR293C, YGR102C, YKL132C
CC	GO:0030956	glutamyl-tRNA(Gln) amidotransferase complex	5.29852e-06	YMR293C, YGR102C
MF	GO:0050567	glutaminyl-tRNA synthase (glutamine-hydrolyzing) activity	5.29852e-06	YMR293C, YGR102C
	GO:0016884	carbon-nitrogen ligase activity, with glutamine as amido-N-donor	0.000209934	YMR293C, YGR102C
	GO:0016879	ligase activity, forming carbon-nitrogen bonds	0.000771133	YMR293C, YGR102C, YKL132C
Group 124 Density 0			P-value 8.83547901178698E-07
members	partners
YDR108W	YBR254C YCR014C YDL147W YDR246W YDR363W-A YDR407C YDR472W YFR010W YGL207W YGR234W YIL078W YKR068C YLL039C YML069W YML077W YMR218C YOR115C YOR259C YPR078C
YEL059C-A	YGL122C YMR150C
YHR078W	YBL032W YDR119W YGL122C YMR150C
YMR035W	YGL122C YMR150C
	GOID	Term	P-value	The genes annotated to this term
BP	No terms were found for this aspect with a corrected P-value <= 0.05.
CC	GO:0042720	mitochondrial inner membrane peptidase complex	8.83548e-07	YMR035W, YEL059C-A
MF	GO:0004175	endopeptidase activity	0.00172639	YMR035W, YEL059C-A
	GO:0070011	peptidase activity, acting on L-amino acid peptides	0.0037597	YMR035W, YEL059C-A
Group 129 Density 8.281573e-04			P-value 9.61120104701671E-06
members	partners
HSPC322	YPL240C
RP5-823N20.1	YPL240C
YAL022C	YBR159W YDR497C YHR140W YJR117W YLL039C YNL197C YPL240C
YAR015W	YAL005C YGL122C YHR082C YLL039C YLR096W YLR291C YPL240C
YBR030W	YGL106W YGL122C YLR244C YPL240C
YBR128C	YBR097W YDL185W YGL105W YGL122C YLR240W YLR360W YPL120W YPL240C
YBR132C	YBR052C YGL006W YHR042W YLL039C YPL240C
YBR199W	YDR384C YLL039C YLR026C YOL018C YOL132W YPL240C
YCL048W	YBL014C YCR024C YNL255C YPL240C
YCL063W	YBR160W YEL013W YFR021W YLR423C YOR326W YPL240C
YCR048W	YCL037C YHL002W YLR427W YPL240C
YDL244W	YER125W YPL240C
YDL246C	YCR084C YJR159W YML064C YMR308C YPL031C YPL240C
YDL247W	YBL032W YPL240C
YDR197W	YGL122C YPL240C
YDR261C	YFR024C-A YHR016C YPL240C
YDR528W	YBL032W YNL161W YPL240C
YDR533C	YBL046W YGL122C YHR079C YLR314C YMR322C YNL189W YPL240C
YER028C	YDR477W YIL106W YJL124C YNL197C YPL240C
YER119C	YCL037C YOL016C YPL031C YPL240C
YFL011W	YGR040W YJL222W YPL240C
YFL021W	YBL032W YIR010W YJR066W YKL161C YML065W YNL229C YPL190C YPL240C
YGL154C	YBR115C YGL122C YGL254W YOR128C YPL240C
YGR117C	YNL236W YPL240C
YGR294W	YHL018W YPL240C
YHL036W	YGL122C YNL197C YPL240C
YHR018C	YGL122C YGL137W YLL039C YNL244C YPL240C
YHR037W	YCL037C YGL122C YLL039C YPL240C
YHR070W	YBL105C YFR021W YJL154C YLL039C YNL138W YPL240C
YHR080C	YDL229W YPL240C
YHR176W	YCL037C YPL240C
YHR202W	YJL092W YKL012W YPL153C YPL240C
YIL003W	YCL037C YGL091C YGL122C YPL240C
YIL014W	YPL240C
YIL167W	YFR014C YJR059W YOL016C YPL240C
YIR011C	YFR004W YFR052W YKL145W YNL189W YPL240C
YJL170C	YCL037C YFR004W YJL092W YPL240C
YJL172W	YBL032W YCL008C YER125W YKL130C YLL039C YNL217W YPL240C
YJR069C	YBR127C YGR040W YNL255C YPL240C
YJR152W	YBR106W YHR007C YIL027C YJL012C YPL240C YPR003C
YJR159W	YBL032W YDL246C YML064C YMR308C YPL031C YPL240C
YKL174C	YAR033W YGL051W YKL008C YLL006W YLL039C YPL240C
YLL007C	YGL122C YPL240C
YLR069C	YDL229W YEL034W YER125W YGL068W YKL012W YKL117W YPL240C
YLR070C	YGL122C YPL240C
YLR087C	YGL122C YNL255C YPL240C
YLR284C	YDR244W YGL122C YML064C YOR180C YPL240C
YML066C	YBL032W YPL240C
YMR014W	YDL014W YDL229W YDR381W YEL026W YGL122C YGR271C-A YOR310C YPL240C
YMR101C	YGL122C YPL240C
YMR282C	YLL039C YOL123W YPL240C
YNL268W	YGL122C YGR055W YLL039C YMR276W YNL197C YPL240C YPL265W
YNR071C	YBR200W YPL240C
YNR072W	YBL032W YKL004W YMR243C YPL240C
YOL029C	YMR186W YPL240C
YOL052C-A	YGL122C YPL240C
YOL065C	YCL037C YDL214C YDR479C YKL007W YLL039C YPL026C YPL240C
YOL101C	YBL032W YGL122C YIR006C YLL039C YPL240C
YOL137W	YDL192W YDR264C YGL203C YLL039C YLR083C YPL240C
YOR009W	YBL032W YGR211W YJR049C YOL006C YPL240C
YOR033C	YDR099W YER177W YMR167W YOL090W YPL240C
YOR192C	YBL032W YBR193C YGL122C YML132W YPL240C
YOR266W	YCR061W YGL122C YGR062C YKL166C YNL307C YPL240C
YOR347C	YGL122C YJL164C YJR045C YLL039C YOL126C YOR370C YPL203W YPL240C
YOR377W	YDR479C YPL240C
YPL059W	YDR151C YGL122C YIL105C YJL127C YNL047C YNL330C YPL106C YPL240C
YPL069C	YBR261C YGL122C YLR291C YNL197C YPL240C
YPR002W	YKR016W YMR148W YMR276W YPL240C
YPR003C	YBR159W YDL147W YFL048C YJR152W YMR106C YPL240C
YPR033C	YBR059C YER151C YFR004W YHR027C YLL039C YPL240C
	GOID	Term	P-value	The genes annotated to this term
BP	GO:0003333	amino acid transmembrane transport	9.6112e-06	YKL174C, YHL036W, YBR132C, YNL268W, YER119C
	GO:0071705	nitrogen compound transport	2.29821e-05	YKL174C, YOR192C, YJR152W, YHL036W, YBR132C, YNL268W, YER119C
CC	GO:0016020	membrane	0.000197886	YFL011W, YJL170C, YLR087C, YBR132C, YCR048W, YBR128C, YHR080C, YHL036W, YOL065C, YNL268W, YIL014W, YNR072W, YJL172W, YCL048W, YHR037W, YOR377W, YKL174C, YAL022C, YOL137W, YCL063W, YOR266W, YDL247W, YPR002W, YHR176W, YOL101C, YDR261C, YML066C, YOR009W, YGR294W, YER119C, YOR192C, YPR003C, YBR199W, YJR152W, YDR197W
	GO:0031224	intrinsic to membrane	0.000622193	YKL174C, YFL011W, YOL137W, YJL170C, YAL022C, YLR087C, YBR132C, YOR266W, YCR048W, YDL247W, YHR080C, YHL036W, YOL101C, YML066C, YDR261C, YOR009W, YGR294W, YNL268W, YER119C, YIL014W, YOR192C, YNR072W, YCL048W, YJL172W, YPR003C, YBR199W, YJR152W
MF	GO:0046943	carboxylic acid transmembrane transporter activity	2.49674e-05	YKL174C, YJR152W, YHL036W, YBR132C, YNL268W, YER119C
	GO:0005342	organic acid transmembrane transporter activity	3.37911e-05	YKL174C, YJR152W, YHL036W, YBR132C, YNL268W, YER119C
	GO:0015171	amino acid transmembrane transporter activity	5.14266e-05	YKL174C, YHL036W, YBR132C, YNL268W, YER119C
Group 130 Density 0			P-value 0.000440349264505649
members	partners
YAL068C	YBL032W YGL158W
YBL100W-A	YLL039C YNL307C
YBR038W	YBR160W YFR028C YGL122C YLL039C YNL307C YPR106W
YBR043C	YBL032W YGR074W YGR157W YNL307C YPL058C
YCL057W	YCL037C YGL122C YLL039C YNL064C YNL307C
YDL186W	YHR079C YLR452C YMR001C YNL307C YPL031C
YDL230W	YBR275C YER125W YER160C YFL010C YFR028C YGL158W YGR032W YGR040W YIL030C YJL187C YKL012W YLR342W YML074C YNL307C YOL041C YPR152C
YDR147W	YDL229W YGL158W YHR087W YJL057C
YDR518W	YGL122C YHR113W YNL307C
YGL186C	YCL037C YNL307C
YGR012W	YER110C YGL122C YLL039C YML086C YNL307C YPR161C
YIL117C	YBL032W YGL122C YLL039C YNL307C
YJR036C	YGL122C YLL039C YNL307C YOL115W
YJR129C	YDL025C YFR014C YNL307C YPL031C
YJR141W	YBR103W YBR160W YER143W YGL158W YJL095W YJL173C YKL101W YLR447C YNL307C YPL012W YPL141C
YLL057C	YGL122C YGL158W YLR291C
YMR115W	YCL044C YER017C YGL122C YGL158W YKL101W YLL039C YNL307C YPR024W
YMR238W	YAL053W YHR061C YLR350W YNL307C
YNL058C	YBL032W YBR160W YCL027W YGL122C YLL039C YNL307C
YNL065W	YCL037C YFR024C-A YGL158W YHR079C YHR082C YMR078C YNL307C YPL026C YPL240C
YOL125W	YAL017W YBR160W YFL038C YGL158W YHR082C YJL057C YKL101W YKL116C YKL171W YNL307C YPL141C
YOR044W	YGL158W YNL197C
YOR193W	YCL056C YGL122C YGL158W YJR010C-A YPL112C
	GOID	Term	P-value	The genes annotated to this term
BP	GO:0006855	drug transmembrane transport	0.000440349	YNL065W, YBR043C
CC	No terms were found for this aspect with a corrected P-value <= 0.05.
MF	GO:0015238	drug transmembrane transporter activity	0.00126756	YNL065W, YBR043C
Group 135 Density 0			P-value 5.95822889737557E-06
members	partners
YDR503C	YCR043C YDR414C YER113C YKL130C YPL246C
YGR046W	YKL130C YLR259C YNL236W
YJL048C	YBR273C YDL126C YKL130C YKL213C YLR368W YLR423C YPR120C
YJL079C	YBL032W YKL130C
YJL158C	YBL032W YDR515W YKL130C
YJL172W	YBL032W YCL008C YER125W YKL130C YLL039C YNL217W YPL240C
YKR013W	YBL032W YKL130C YPL190C
YMR003W	YDR388W YGL122C YKL130C
YOR247W	YBL032W YFR024C-A YHR016C YKL129C YKL130C YLR223C YMR109W
	GOID	Term	P-value	The genes annotated to this term
BP	No terms were found for this aspect with a corrected P-value <= 0.05.
CC	GO:0005576	extracellular region	5.95823e-06	YJL158C, YKR013W, YJL079C, YOR247W
	GO:0000322	storage vacuole	0.000135598	YKR013W, YJL172W, YJL079C, YOR247W
	GO:0000323	lytic vacuole	0.000135598	YKR013W, YJL172W, YJL079C, YOR247W
MF	No terms were found for this aspect with a corrected P-value <= 0.05.
Group 136 Density 0			P-value 2.94392882664548E-06
members	partners
At3g19210	YER095W
YDR004W	YDR076W YER095W YER173W YGL122C YHR154W YJL092W YLR394W
YDR014W-A	YER095W YGL163C
YPL121C	YER095W YER179W YHR079C-A YJL092W YKR016W
YPR011C	YBL032W YEL002C YER095W
	GOID	Term	P-value	The genes annotated to this term
BP	GO:0000707	meiotic DNA recombinase assembly	2.94393e-06	YPL121C, YDR004W
	GO:0045003	double-strand break repair via synthesis-dependent strand annealing	6.17967e-06	YPL121C, YDR004W
	GO:0007126	meiosis	0.000106481	YPL121C, YDR004W, YDR014W-A
CC	GO:0000794	condensed nuclear chromosome	0.00145702	YPL121C, YDR014W-A
MF	No terms were found for this aspect with a corrected P-value <= 0.05.
Group 139 Density 0			P-value 0.00131229416187149
members	partners
YBR265W	YBR126C YHR082C YJL151C YLR075W
YIL177C	YBL032W YBR126C YKL049C YNL255C YPR034W
YIR032C	YBR126C YCL037C YGL122C YNL197C
YLR411W	YBR126C YDL015C YDR414C YGL122C YNL255C
YMR251W	YBR126C
	GOID	Term	P-value	The genes annotated to this term
BP	GO:0009308	amine metabolic process	0.00131229	YIR032C, YBR265W, YMR251W
CC	No terms were found for this aspect with a corrected P-value <= 0.05.
MF	No terms were found for this aspect with a corrected P-value <= 0.05.
Group 140 Density 3.263974e-03			P-value 5.11393157190793E-68
members	partners
YAL038W	YBR221C YBR279W YDL055C YDL066W YDL116W YDL207W YDR130C YDR148C YDR192C YDR335W YDR510W YER151C YER171W YFL045C YFR004W YFR049W YGL100W YGL244W YHL030W YHR027C YHR128W YHR169W YHR200W YIL021W YIL128W YIR010W YJL039C YJL074C YJL101C YJL164C YJR059W YKL029C YKL049C YKL110C YKR081C YKR082W YLL039C YLR153C YLR166C YLR180W YLR418C YML031W YML103C YNL255C YNL289W YNL307C YNR051C YOL098C YOL145C YOR117W…
YBL076C	YAL043C YBR055C YBR058C YBR109C YBR123C YDL100C YDR238C YDR328C YDR510W YFR004W YFR052W YHL030W YHR019C YHR027C YHR200W YKL029C YLL039C YLR016C YLR060W YNL244C YNL255C YOR080W YOR117W YPL235W YPR110C
YBL099W	Q0080 Q0085 Q0130 YBR262C YCL057C-A YCR063W YDL181W YDR322C-A YER151C YFL002C YFR004W YGR281W YHR027C YHR200W YIR010W YJL180C YJR121W YKR016W YLL039C YLR052W YNL315C YOR117W YPL078C
YBR011C	YBR109C YBR217W YCL037C YDL203C YDR510W YER125W YER151C YFR004W YFR031C-A YGL120C YGL122C YGL237C YHR010W YHR027C YHR030C YHR200W YIL030C YIL103W YIL133C YJL033W YJL098W YJL191W YJR017C YJR062C YKL108W YKR043C YLL039C YLL060C YLR371W YLR425W YML056C YMR142C YMR267W YNL079C YNR051C YOR011W YPL066W YPL111W YPL153C YPL204W YPR080W YPR152C
YBR025C	YBR055C YBR175W YBR198C YDL185W YDR398W YER151C YFR004W YGL039W YGL122C YGL195W YHR027C YHR167W YHR169W YHR200W YJR121W YKL081W YLL039C YLR153C YML062C YMR047C YMR059W YNL088W YNL154C YNL255C YNL272C YNR051C YOL090W YOL117W YOL142W YOR117W YPL002C
YBR118W	YAL003W YAL043C YBL026W YCL037C YCR059C YDL002C YDL160C YDR130C YDR143C YDR192C YDR283C YDR477W YDR510W YEL015W YEL034W YER012W YER112W YER125W YER151C YFL023W YFR004W YGL003C YGR092W YGR173W YHL034C YHR027C YHR082C YHR084W YHR135C YHR154W YHR186C YHR200W YIL064W YIL115C YIR010W YJL039C YJL106W YJL124C YJL164C YJL190C YKL049C YKL081W YKL101W YKL117W YKL139W YKR016W YKR081C YLL039C YLR166C YLR249W…
YBR121C	YBR055C YDR388W YDR510W YER151C YFR004W YGR128C YHR027C YHR082C YHR200W YKR063C YLL039C YLR427W YMR223W YNL244C YNL255C YNL313C YOR001W YOR117W
YBR127C	YBR001C YBR072W YBR194W YDL156W YDL185W YDL213C YDR202C YDR289C YDR328C YDR510W YEL051W YER036C YER151C YFL039C YFR004W YGL122C YGL227W YGR020C YGR155W YGR281W YHL030W YHR039C-A YHR084W YHR200W YIR010W YJR033C YJR069C YKL049C YKL080W YLL039C YLR088W YLR447C YML121W YMR054W YNL239W YNL255C YNR051C YOR117W YOR181W YOR189W YOR270C YOR332W YPL151C YPL234C YPR036W YPR116W YPR152C
YBR196C	YAL027W YDR164C YDR172W YDR328C YDR510W YER125W YER151C YFR004W YGL229C YHR027C YHR152W YHR200W YJL062W-A YLL039C YLR044C YLR088W YLR249W YMR186W YNR051C YOL086C YOR117W YOR270C YPR029C
YBR208C	YBR221C YDL029W YDL156W YDR328C YHR200W YJL098W YLL039C YNL177C YOL133W YOR117W
YCL030C	YBR194W YCL037C YDL160C YDR510W YFR004W YGR052W YHL030W YHR027C YLL039C YLR044C YLR180W YML124C YOL013C YPL031C YPR152C
YCL040W	YAL024C YBR009C YBR040W YBR126C YFR004W YFR034C YGL122C YHR027C YHR200W YLL039C YML099C YNL189W YOR117W YOR244W YOR310C
YCL050C	YDL156W YDR510W YFL002C YFR004W YHR200W YJR022W YLL039C YNR051C YPL031C
YCR004C	YBR052C YBR136W YDL101C YDR032C YFR004W YGL122C YGR130C YHR027C YHR200W YLL039C YMR031C YMR086W YNL255C
YCR012W	YAL024C YAR007C YBL026W YBR194W YCR077C YDL097C YDL145C YDR161W YDR188W YDR378C YDR510W YEL031W YER112W YER133W YER146W YER151C YFL002C YFL023W YFR004W YGL122C YGL137W YGL158W YGR192C YGR252W YHL030W YHR027C YHR152W YHR174W YHR200W YIL128W YIR010W YJL030W YJL124C YKL060C YKR081C YLL039C YLR044C YLR438C-A YML072C YNL006W YNL147W YNL192W YNL255C YNR051C YOL086C YOL135C YOR098C YOR117W YPL190C YPL24…
YDL022W	YBR010W YCL037C YDL095W YDR142C YDR510W YFR004W YGL122C YHR027C YHR200W YLL039C YNL031C YOR117W YPL022W
YDL084W	YBL002W YBL003C YBR009C YBR010W YBR081C YCL011C YDR138W YDR143C YDR159W YDR224C YDR225W YDR381W YDR432W YDR448W YDR510W YER013W YER063W YFR004W YGL112C YGL122C YGR252W YHR027C YHR102W YHR167W YHR200W YIL021W YKL139W YKL214C YLL039C YML062C YMR223W YMR228W YMR314W YNL004W YNL030W YNL031C YNL139C YNL253W YNR051C YOL072W YOR117W YOR166C
YDL131W	YDL182W YDL214C YDR143C YDR510W YFL010C YFR004W YFR034C YGL122C YHR027C YHR079C YHR082C YHR200W YJL168C YJR017C YKL012W YLL039C YNL247W YOL113W YOR117W YPL031C YPL240C
YDL171C	YAL024C YBL003C YBL023C YBL087C YBR010W YDL047W YDL156W YDR225W YER110C YER151C YFR004W YFR034C YGL122C YGR214W YHR027C YHR200W YJL141C YJR123W YKL049C YKL104C YLL039C YLR075W YLR166C YMR117C YNL031C YOR133W YPL031C YPR086W
YDR001C	YBR001C YBR160W YDL229W YDR099W YDR381W YER177W YFR004W YFR014C YGL122C YHR027C YHR200W YJL164C YJR059W YLL039C YLR270W YNL088W YPL026C YPL203W YPL216W YPL240C
YDR006C	YBL032W YBR009C YDL156W YER177W YFR004W YFR028C YGR285C YHR200W YLL039C YLR192C YNL030W YOR117W
YDR023W	YBL036C YCL024W YCR073C YDL175C YDR143C YDR388W YER151C YFR004W YFR034C YGL122C YGR239C YHL007C YHR027C YHR079C YHR135C YHR200W YJL057C YKL101W YKL116C YKL166C YKL171W YKR071C YLL039C YLR442C YMR059W YNL255C YNL307C YOL087C YOL117W YOL123W YOR117W YOR233W YOR267C YPL141C YPL153C YPL204W
YDR033W	YBL032W YER151C YFR004W YGL122C YHR027C YHR200W YIR010W YJR010C-A YJR066W YKL203C YLL039C YNL197C YNL251C YNR051C YOR153W
YDR037W	YBR055C YDL126C YDR328C YDR388W YER151C YFR004W YGL180W YHL007C YHR027C YHR135C YHR200W YJL124C YLL039C YNL135C YNL154C YNR051C YOR117W YPR056W
YDR050C	YAL024C YBR194W YDR161W YDR510W YER151C YFR004W YGL122C YHR200W YIL021W YKL060C YLL039C YLR430W YMR186W YNL079C YNL127W YNL251C YNR051C YOL086C YOR117W YOR151C YPL190C YPR152C
YDR074W	YAR066W YBR126C YBR194W YDR416W YER019C-A YER178W YFR004W YGL122C YHR027C YHR082C YHR196W YHR200W YKR063C YLL039C YML100W YMR261C YNL154C YPR152C
YDR129C	YAR007C YBR055C YBR234C YCR008W YCR088W YDL095W YDR353W YDR388W YEL037C YFL002C YFL039C YFR004W YGL092W YGL122C YHR027C YHR200W YIL034C YIL062C YJL092W YJL138C YJR066W YKL085W YKL126W YKL203C YLL039C YLR203C YLR330W YLR429W YMR246W YNL135C YNL138W YOL013C YOR117W YOR181W YPL022W
YDR158W	YBL032W YBR055C YDL101C YDR143C YDR439W YDR510W YFL002C YFR004W YHR027C YHR200W YJL164C YKL130C YKL166C YLL039C YLR314C YOR117W
YDR226W	YBL036C YCL037C YDL043C YDR177W YDR510W YDR515W YER078C YER125W YFL010C YFR004W YFR028C YGL122C YGL227W YGR092W YHR027C YHR082C YHR200W YJL095W YJL153C YLL004W YLL039C YML064C YNL154C YOR117W YPL026C YPL031C YPL153C
YDR233C	YBL032W YCL037C YDL042C YDL089W YDL204W YDR510W YEL056W YER087C-B YER110C YFL038C YFR004W YHL030W YHR027C YHR200W YIL068C YIR010W YKR010C YLL023C YLL039C YLR018C YLR166C YMR223W YNL044W YOR117W YOR285W YPL154C
YDR238C	YAL026C YBL076C YBR047W YBR081C YBR162C YBR198C YCL037C YDL055C YDL145C YDL192W YDR100W YDR170C YDR372C YER112W YER122C YER151C YFL002C YFR004W YFR051C YGL003C YGL051W YGL122C YGL137W YGR037C YGR229C YGR252W YHL030W YHR027C YHR169W YHR200W YIL076W YIL106W YJL151C YKL004W YKL049C YKL145W YLL039C YLR051C YLR268W YML067C YNL284C YNL287W YNR051C YOR197W YOR363C YPL004C YPL010W YPL057C YPL246C
YDR300C	YAL024C YBR009C YER107C YER151C YFR004W YGR092W YHR164C YLL039C YML095C YNL177C YNL255C YNL265C YNR051C YPL240C YPR137W
YDR321W	YER151C YFR004W YGL122C YNR051C
YDR345C	YER151C YFR004W YGL122C YHR027C YHR200W YJR066W YKL117W YKL203C YLL006W YLL039C YNR051C
YDR368W	YBR200W YFR004W YGL122C YHR027C YHR200W
YDR385W	YAL005C YAL024C YBL003C YBL071W-A YDL055C YDR044W YDR166C YDR172W YDR188W YDR328C YDR510W YER023W YER151C YFR004W YFR034C YGL105W YGR187C YGR252W YGR270W YHL014C YHR027C YHR152W YHR200W YIL103W YIR007W YIR010W YJL014W YJL033W YJL046W YJL062W-A YJL138C YJL153C YKL049C YKL060C YKL152C YKL191W YKR081C YLL039C YLR022C YLR027C YLR172C YLR249W YML011C YMR031C YMR083W YMR315W YNL045W YNL189W YNL250W YNL…
YDR502C	YAL005C YDL015C YDR062W YDR328C YER068W YER151C YFR004W YHL014C YHR027C YHR084W YHR169W YHR200W YLL039C YLR153C YLR180W YLR347C YNL255C YNL288W YOR117W YPL125W
YEL031W	YCR012W YFR004W YHR027C YHR174W YHR200W YLL039C YLR207W YMR215W
YEL039C	YDR523C YFR004W YGL078C YGL122C YGR029W YHR027C YHR195W YJL164C YKL195W YKR016W YLL039C YNL154C YNL197C YNL229C YOR117W YPL144W
YEL046C	YAL024C YBL032W YBR009C YFR004W YFR034C YGR092W YHR027C YHR200W YJL074C YJL141C YLL039C YNL251C YOR117W YPL249C
YEL071W	YAL005C YDL229W YER151C YFR004W YHR027C YKL103C YLL039C YNL251C YOR117W YPL004C YPL063W YPL190C YPR165W
YER023W	YBR109C YCL037C YDR143C YDR385W YER151C YFL002C YFR004W YGL122C YGL137W YHR027C YIL070C YKR048C YLL039C YLR291C YNL255C YNL259C YNR051C YOR244W YPL169C
YER043C	YDR034C YDR306C YDR510W YER151C YER161C YFL028C YFR004W YGL237C YGR252W YHR027C YHR135C YHR200W YIR005W YIR007W YJR090C YKL161C YLL039C YLR442C YML095C YMR049C YMR059W YNL157W YNR051C YOR117W
YER052C	YDL059C YFR004W YFR034C YGL190C YHR027C YHR200W YJL058C YLL039C YLR293C YLR310C YMR139W YNL135C YOR117W
YER055C	YCL037C YDR515W YFR004W YGL122C YHR027C YHR200W YLL039C YNL255C
YER062C	YBR139W YBR182C YCL037C YDL059C YDR328C YDR510W YER171W YFR004W YGL090W YHL032C YHR027C YHR200W YIL045W YJL173C YKL069W YLL039C YML058W YMR091C YNL281W YPL201C YPR152C
YER069W	YFR004W YGL122C YHR027C YHR121W YHR200W YKR016W YLR147C YPR046W
YER070W	YBL032W YBR072W YER015W YER133W YFR004W YGR180C YHR027C YHR169W YIL030C YIL066C YJL026W YKL117W YLL039C YLR153C YML058W YML064C YNR051C YOR117W YOR197W
YER081W	YAL060W YBL085W YBR042C YBR155W YBR276C YDL117W YDL168W YDR005C YDR105C YDR192C YDR194C YFR004W YGL122C YHR027C YHR200W YHR215W YIL074C YLL039C YMR047C YNL054W-B YOR117W YPL233W
YER090W	YBR010W YBR234C YCL037C YDL156W YDR169C YDR179C YDR510W YEL048C YFL002C YFR004W YGL122C YGL137W YHL007C YHR027C YHR200W YJL060W YJR070C YKL211C YLL039C YLR180W YNL031C YOL139C YOR117W
YER091C	YBL002W YER125W YFR004W YHR107C YHR200W YJR093C YKR063C YLL039C YLR347C YMR049C YMR059W YOL013C YOR117W YPL013C YPL240C
YER120W	YAR042W YCL037C YDL019C YDL072C YDR150W YDR510W YER056C YER110C YFR004W YGL122C YGR086C YHL020C YHR027C YHR196W YHR200W YIL076W YJL095W YKL049C YKL065C YLL039C YLR305C YLR342W YML065W YMR049C YMR216C YOR117W
YER143W	YAL030W YDL227C YDR468C YEL037C YFR004W YFR014C YFR052W YGR233C YHR027C YJR141W YLL039C YML088W YMR055C YNR024W YOL018C YOR117W YOR327C YPL232W
YER156C	YFR004W YHR027C YHR200W YPL209C
YER178W	YBR221C YCL037C YCR079W YDR074W YDR430C YFR004W YGL122C YGL137W YGR229C YHR027C YHR200W YIL042C YIR010W YJL128C YKL049C YKR016W YLL039C YLR166C YLR340W YMR308C YNL071W YNL255C YNR051C YOR090C YOR117W
YFL022C	YBR081C YFR004W YHR200W YJL014W YKL049C YKL130C YKR026C YLL039C YLR060W YLR293C YMR059W YMR284W YNR051C YOR117W YPL031C YPL240C
YFL045C	YAL038W YDL059C YDR227W YDR398W YDR510W YER151C YFR004W YGL195W YGL208W YHR107C YHR200W YJL092W YJL130C YJR035W YLL039C YML064C YML085C YMR049C YMR059W YNR051C YOL062C YOR117W YOR212W YPL235W
YFR030W	YBR160W YBR217W YDR304C YDR381W YDR388W YFR004W YGL003C YGL122C YGL150C YGR262C YHR027C YHR200W YIL094C YJL123C YLR291C YOR361C YPR010C
YGL004C	YBR272C YDL007W YDL097C YDL147W YDR394W YDR427W YER021W YFR004W YGL048C YGR232W YHL030W YHR027C YHR200W YIL007C YIL075C YKL145W YLR421C YOR117W YOR259C YOR261C YPL235W YPR108W
YGL008C	YAL007C YAL026C YBL032W YBR159W YBR279W YCL011C YDL095W YDL193W YDR130C YDR365C YDR456W YDR510W YER151C YFR004W YGL167C YGL244W YGR040W YGR130C YHL030W YHL040C YHR027C YHR030C YHR039C YHR098C YHR200W YIL021W YIL109C YIR010W YJR005W YJR010C-A YJR059W YJR066W YKL049C YKL193C YKL203C YKR016W YKR039W YLL039C YLR418C YLR430W YMR086W YMR127C YNL004W YNL124W YNL251C YNL291C YNR051C YOL145C YOR117W YOR12…
YGL009C	YDR079C-A YDR510W YFR004W YGR171C YGR207C YGR250C YHR027C YKL049C YLL039C YMR291W YOL086C YOR117W YPL028W YPL240C YPR175W
YGL026C	YAL032C YBR010W YDR388W YDR510W YER012W YER180C YFR004W YGR252W YHR027C YHR200W YKR026C YKR063C YLL039C YMR223W YNL031C YNL135C YOR117W YPR110C
YGL037C	YAL024C YBR261C YBR274W YDR143C YFR004W YGL116W YGL122C YGR092W YHR200W YLL039C YNL189W YNL251C YNR051C YPL070W
YGL148W	YAL024C YDR510W YER151C YFR004W YFR034C YGL122C YIL035C YLL039C YNR051C
YGL202W	YCL037C YDR523C YFR004W YGL122C YGR074W YHR027C YHR200W YLL039C YOR117W YPL106C
YGL234W	YBL026W YBR049C YBR059C YBR217W YFR004W YHR027C YIR010W YJR068W YJR123W YKL166C YLL039C YLR258W YNL178W YNL251C YNR051C YOL094C YOR090C YOR117W YPL031C YPL190C YPR154W
YGL253W	YBR193C YDR477W YER151C YFR004W YFR053C YGL035C YGR218W YHR027C YHR152W YHR200W YKL038W YLL039C YLR347C YNL139C YNL189W YNL206C YOL097C YOR117W
YGR027C	YCL037C YDL083C YDL229W YER016W YER151C YFL002C YFR034C YGL030W YGL122C YGR086C YGR252W YHR027C YHR200W YIL095W YIR010W YJL177W YJR123W YKL180W YLL039C YLR287C-A YML126C YNL207W YNL255C YNR051C YOL127W YOR117W YPL004C
YGR061C	YAL032C YBR055C YDR510W YFR004W YGL122C YHR027C YHR200W YLL039C YLR386W YOR117W YOR124C
YGR094W	YBR109C YDL055C YDR258C YFR004W YFR028C YGL112C YGL122C YGR128C YHR027C YHR082C YHR200W YIL095W YJL095W YLL039C YML121W YMR234W YOR117W YPR154W
YGR124W	YBL039C YDR510W YFR004W YGL122C YHR027C YHR200W YLL039C YLR196W YOR117W YPR145W
YGR185C	YBL036C YDR041W YDR453C YFR004W YGR128C YGR229C YHR027C YHR196W YHR200W YLL029W YLL039C YMR158W YNL247W YNL255C YNL306W YNR043W YOR117W YPL013C YPR106W
YGR192C	YAR042W YBR041W YBR114W YCR012W YDL002C YDL042C YDL116W YDL207W YDL229W YDR075W YDR130C YDR143C YDR188W YDR192C YDR434W YDR510W YER048W-A YER103W YER110C YER111C YER151C YFR004W YGL100W YGL122C YGL181W YGR130C YGR232W YGR254W YGR270W YHL030W YHR027C YHR154W YHR170W YHR200W YIR001C YJL039C YJL052W YKL039W YKL060C YKL129C YKL142W YKL152C YKR016W YKR081C YLL039C YLR039C YLR430W YMR086W YMR109W YNL18…
YGR211W	YBR122C YDR510W YFR004W YGL071W YHR200W YLL039C YOR009W YOR117W
YGR254W	YAL024C YBL030C YBL105C YBR194W YDL229W YDR188W YDR510W YER133W YER151C YFR004W YGL122C YGR192C YHR013C YHR027C YHR152W YHR200W YJL030W YJL129C YJR045C YLL039C YNL055C YNL073W YNL079C YNL255C YPR152C
YHR019C	YBL076C YBR055C YDL143W YDR427W YDR510W YEL022W YER151C YFR004W YFR009W YGL066W YGL195W YGR214W YGR218W YHL030W YHR020W YHR027C YHR200W YIL075C YIL094C YIR005W YJL091C YJR123W YKL010C YKL095W YKL104C YKL130C YKL198C YLL039C YLR075W YLR106C YLR180W YML085C YMR012W YMR142C YMR223W YNL244C YOR080W YOR117W YOR133W YOR151C YPL226W
YHR020W	YBR069C YBR194W YBR217W YDR062W YDR130C YDR170C YDR510W YEL022W YER151C YFL002C YFR004W YGR175C YGR218W YGR270W YHR019C YHR027C YHR200W YIL094C YJR077C YKL104C YLL039C YLR180W YLR222C YLR452C YNL255C YNL272C YNR051C YOL094C YOR117W YPR152C
YHR021C	YDR328C YFR004W YFR034C YGL122C YHR027C YIR010W YLL039C YNL207W YNR051C YOR117W
YHR025W	YCL037C YER021W YER151C YFR004W YHR027C YHR200W YKR081C YLL001W YLL039C YML064C YNL189W YNR051C YOR117W
YHR063C	YBR059C YCL037C YDR247W YFR004W YHR027C YHR200W YIL030C YKL012W YLL039C YOR011W YOR117W
YHR104W	YBR186W YDL229W YFR004W YGL006W YGL122C YGL158W YHR027C YHR200W YLL039C YML086C YNL154C YOL016C YOL045W
YHR128W	YAL038W YDL055C YDL100C YFL037W YFR004W YFR028C YHR027C YHR152W YHR200W YJL130C YLL039C YML085C YNL197C YNR012W YNR051C YOR117W YPL031C YPL235W YPR185W
YHR174W	YAL024C YBR194W YBR274W YCR012W YDL207W YDL229W YDR161W YDR172W YDR188W YDR510W YEL031W YER012W YER125W YER151C YER168C YFL010C YFR004W YGL044C YGL100W YGL122C YGR252W YGR261C YHL030W YHR027C YHR121W YHR152W YHR200W YIL030C YIR010W YJL030W YJL039C YJL168C YJR017C YKL012W YKL049C YKL060C YKL142W YKR081C YLL039C YLR044C YLR196W YNL006W YNL127W YNL192W YNL255C YNR051C YOL135C YOR011W YOR098C YOR117W…
YHR183W	YBR114W YDL200C YDR510W YEL056W YER125W YER151C YER161C YFR004W YGL216W YGR184C YGR256W YHR027C YHR030C YHR135C YHR137W YHR196W YHR200W YIL030C YKL012W YKL085W YLL039C YML121W YMR049C YMR059W YNL014W YNR051C YOR117W YPL031C YPL126W YPL150W YPL240C YPR110C YPR152C
YHR190W	YDR510W YER044C YFR004W YGL001C YGL012W YGR060W YHR007C YHR027C YHR200W YKR046C YLL039C YLR056W YLR100W YML008C YNL083W YOR075W
YHR193C	YBL003C YBR082C YCL037C YDR059C YDR174W YDR221W YDR381W YDR510W YDR515W YER125W YFL023W YFR004W YGL122C YGR134W YHL030W YHL034C YHR027C YHR030C YHR200W YIR010W YJR011C YKL180W YKR081C YLL039C YLR146C YMR049C YMR140W YNL088W YNL112W YNL247W YNL255C YNR052C YOR063W YPL037C YPL204W YPL210C YPL243W YPR088C YPR111W
YIL053W	YAL005C YBR182C YBR194W YDL059C YDL229W YDR328C YDR510W YER151C YER171W YFL002C YFR004W YFR014C YGL237C YHL032C YHR027C YHR152W YHR200W YIL021W YIL095W YJL173C YJR035W YKL130C YLL039C YNR051C YOL016C YOR117W YOR151C YPL031C YPL106C YPL201C YPR152C
YIL074C	YAR042W YBR261C YER081W YFR004W YFR014C YHR027C YJL164C YJR059W YLL039C YLR291C YNL311C YOR117W YPL031C
YIL078W	YDL229W YDL234C YDR108W YDR510W YER151C YFR004W YGL122C YGL158W YHR027C YHR082C YHR200W YKL012W YKL029C YKL101W YKL198C YLL039C YMR059W YMR099C YNL135C YNL255C YNR051C YOL120C YOR001W YOR117W YOR244W
YIL109C	YAL024C YAR033W YCR028C-A YDL195W YDL212W YDR170C YDR517W YER151C YFR004W YGL008C YGL051W YGL053W YGL122C YGL200C YGR057C YGR155W YHL030W YHR027C YHR098C YHR200W YIL004C YJL004C YJR059W YKL068W YKL103C YKL171W YLL039C YLR026C YLR078C YLR208W YLR245C YLR268W YML012W YMR124W YOL130W YPL031C YPL085W YPL204W YPL218W YPR181C
YIL118W	YBR260C YCL032W YCL037C YER008C YFR004W YGL019W YGL122C YHR027C YHR200W YIL035C YJL085W YKL130C YLL039C YNL271C YOR061W YOR326W YPL031C
YIR036C	YCL037C YFR004W YGL122C YHR027C
YJL008C	YBR081C YBR198C YDL029W YDL055C YDL156W YDL229W YDR127W YDR448W YDR510W YER151C YFL002C YFR004W YFR034C YGL066W YGL116W YGR245C YGR250C YGR252W YHR027C YHR102W YHR119W YHR200W YIR010W YJL014W YJL074C YJL159W YJR066W YKL010C YKL049C YKL203C YLL039C YLR055C YMR128W YMR236W YNL212W YNR051C YOR117W YOR281C YOR375C YPL240C
YJL026W	YAR003W YBR089C-A YDL047W YDR151C YDR398W YDR510W YER070W YFL008W YFR004W YGL016W YGL122C YGL137W YGR180C YHR027C YHR169W YHR200W YIL103W YJL005W YJL115W YLL039C YLR136C YLR437C YLR442C YML064C YML095C YMR059W YOR117W YOR229W YOR230W YPL012W YPR054W
YJL060W	YBR160W YER090W YFR004W YHR027C YHR200W YJL153C YLL039C YLR314C YOR327C YPL004C YPL031C
YJL088W	YDL017W YFR004W YGL011C YGR250C YHR027C YHR200W YLL039C YOR117W YPL111W
YJL111W	YBR160W YBR198C YDL047W YDL101C YDL143W YDL156W YDR188W YER151C YFL037W YFR004W YGL003C YGL116W YGL122C YGL190C YHR027C YHR119W YHR200W YIL142W YJL014W YKL049C YLL039C YLR055C YMR028W YMR223W YNL154C YNL212W YNL255C YNR051C YOR117W YOR281C
YJL167W	YBR055C YDR369C YDR510W YER022W YFR004W YFR014C YGL119W YGR270W YHR027C YHR200W YIL030C YJL164C YJR035W YJR059W YJR140C YLL039C YLR256W YNL244C YOR011W YOR117W YPL031C YPL149W
YJR077C	YBL030C YBR010W YBR017C YBR069C YBR114W YDR062W YDR170C YEL022W YER100W YER110C YFL002C YFR004W YGL195W YGR218W YHL030W YHR020W YHR027C YHR200W YJL039C YJL130C YKL182W YKR016W YLL039C YLR259C YLR342W YML016C YML085C YMR186W YNL031C YNL305C YOR117W YPR184W
YJR094W-A	YBL032W YBL092W YBR175W YCL037C YDL182W YDR515W YER151C YFR004W YFR034C YGL122C YGL158W YGL245W YGR092W YGR275W YIL043C YIR010W YLL039C YNL255C YNR051C YOR117W YPL031C
YJR104C	YAL024C YBR055C YBR109C YCL037C YDL101C YDL176W YDR510W YFR004W YGL122C YHR027C YHR135C YHR200W YJL034W YKL095W YLL039C YMR038C YMR059W YNL020C YNL135C YPL031C
YJR105W	YBR055C YDL047W YDL229W YFR004W YGL158W YGR040W YHR027C YHR152W YHR200W YIL127C YKL004W YLL039C YNL106C YOR117W YPL141C YPL150W YPL204W
YJR109C	YBL039C YBR009C YBR217W YDL055C YDR394W YDR510W YER086W YER095W YFR004W YHR027C YHR169W YHR200W YJL130C YJR068W YKL104C YKL182W YLL039C YLR291C YMR106C YOL128C YOR117W YOR303W YPL204W YPL235W
YKL056C	YBR249C YCL037C YDL200C YDR515W YER082C YER100W YER151C YFL002C YFR004W YGL122C YGL163C YHR027C YHR107C YHR200W YIL021W YKL081W YLL039C YLR022C YLR430W YMR059W YNR051C YOR117W YOR151C YPL031C YPL048W YPL204W
YKL120W	YBR017C YDR414C YER110C YFR004W YHR027C YHR195W YHR200W YKR016W YLL039C YLR207W YML008C YNL121C YNR055C YOR117W
YKL127W	YBR081C YCL037C YDL059C YFR004W YFR014C YGL122C YHR027C YHR200W YJL164C YJR059W YLL039C YOL045W YPL031C
YKL152C	RP1-177P10.1 YAL024C YBR194W YDL090C YDR161W YDR328C YDR385W YDR510W YER125W YER151C YFR004W YGL227W YGR192C YHR027C YHR152W YHR154W YHR165C YHR200W YIR010W YJL039C YKL060C YKL101W YKL129C YKR081C YLL036C YLL039C YLR153C YLR180W YML028W YMR109W YNL127W YNL255C YNR051C YOR098C YOR117W YPL061W YPR152C
YKL182W	YBL032W YBR194W YDL015C YDL112W YDR099W YDR164C YER036C YER095W YER151C YER177W YFR004W YFR034C YGR252W YHL030W YHL034C YHR027C YHR200W YIR010W YJR077C YJR109C YKL029C YKL049C YKL126W YLL039C YLR044C YLR055C YLR180W YLR340W YML100W YML121W YML124C YNL243W YNR051C YOR117W YPL231W YPR152C
YKL210W	YAL012W YBL035C YBR055C YBR082C YBR109C YBR169C YBR274W YDL059C YDL079C YDL140C YDR092W YDR177W YDR415C YER100W YER123W YFR004W YGL058W YGL122C YGR204W YGR267C YHL030W YHR027C YHR082C YHR135C YHR200W YJR099W YKL145W YKR082W YLL039C YLR084C YLR096W YLR306W YML112W YMR059W YMR108W YNL232W YOR027W YOR117W YOR184W YOR339C YPL026C YPL204W YPL209C YPR054W YPR080W
YKL216W	YDR510W YEL023C YER151C YFL002C YGL122C YHR027C YJR072C YKR055W YLL039C YNL135C YNL255C YNR051C
YKR043C	YBR011C YFR004W YHR027C YLL039C YNL255C YOR117W
YLL018C	TD(GUC)B TD(GUC)D TD(GUC)G1 TD(GUC)G2 TD(GUC)I1 TD(GUC)I2 TD(GUC)J1 TD(GUC)J2 TD(GUC)J3 TD(GUC)J4 TD(GUC)K TD(GUC)L1 TD(GUC)L2 TD(GUC)M TD(GUC)N TD(GUC)O TD(GUC)Q YAL027W YBL007C YBR017C YBR055C YBR059C YDL055C YDR523C YER151C YFR004W YGL059W YHR027C YHR200W YJL130C YJL164C YJL168C YKL012W YLL039C YMR216C YNL183C YOL120C YOR117W YPL209C YPL240C
YLL050C	YBR109C YBR135W YBR159W YBR200W YCL037C YDR328C YDR515W YEL037C YER151C YFL008W YFL039C YFR004W YFR016C YGL063W YGL122C YGL179C YGL195W YGL241W YGR233C YHR027C YHR200W YJL005W YJR090C YLL039C YLR039C YLR059C YLR074C YLR319C YLR429W YML064C YMR059W YMR092C YNL079C YNL094W YNL138W YOR080W YOR117W YOR181W
YLR044C	YAL024C YAL027W YBR069C YBR114W YBR170C YBR194W YBR196C YCL030C YCR012W YDR143C YDR510W YER133W YER151C YER179W YFR004W YGL122C YHL030W YHR027C YHR152W YHR174W YHR200W YIL038C YIR010W YJL030W YJL039C YJR093C YKL039W YKL049C YKL060C YKL166C YKL182W YKR081C YLL019C YLL039C YLR249W YML072C YNL127W YNL272C YNR051C YOL086C YOR117W YOR260W YOR270C YPL082C YPL190C YPR152C
YLR048W	YBL032W YBR079C YDL055C YDR127W YDR510W YER151C YFR004W YGR214W YHR027C YHR200W YIL094C YJR068W YKL145W YKR081C YLL039C YLR180W YLR274W YLR347C YLR410W YLR432W YML065W YMR072W YMR109W YNL112W YNL124W YNL207W YNL255C YNR051C YOR117W YOR136W YOR217W YPL106C YPR035W YPR129W
YLR058C	YAL024C YCL014W YCL037C YDL043C YDR234W YDR328C YDR510W YEL047C YER012W YER146W YER151C YFR004W YFR009W YFR034C YGR092W YHR027C YHR200W YJL128C YKL104C YKR099W YLL039C YLR085C YNL290W YOL054W YOR081C YOR117W
YLR060W	YBL076C YCL024W YDL015C YDL108W YDR466W YDR510W YER151C YFL022C YFR004W YFR014C YHR027C YHR200W YKL048C YKL139W YLL039C YNR051C YOL013C YOL100W YOR117W YOR231W YOR355W YPL031C YPR106W
YLR061W	YER016W YER151C YFL002C YHL030W YHR200W YIR010W YJL109C YKL009W YNL110C YNL255C YNR051C YPL240C
YLR134W	YBR081C YBR296C-A YDL017W YDL132W YER125W YER133W YER179W YFR004W YHR027C YHR135C YHR200W YIL030C YJR090C YLL039C YLR175W YNL244C YPL031C
YLR300W	YFL002C YFR004W YHR027C YMR049C YOL126C
YLR303W	YAL043C YBR160W YDR409W YDR510W YFR004W YGL158W YGR092W YHR027C YHR200W YIL095W YLL039C YLR377C YOL128C YOR117W
YLR354C	YDL229W YDR510W YER151C YFL010C YFR004W YGL122C YGR043C YHR027C YHR200W YIR034C YJL068C YJR017C YKL108W YLL039C YNL053W YOR117W YPR152C
YLR355C	YBR155W YDR035W YDR388W YDR499W YDR510W YER086W YER151C YFL002C YFR004W YGL122C YHR027C YHR030C YHR135C YKR016W YKR081C YLL039C YLR055C YLR442C YML065W YMR072W YOR098C YOR117W
YML022W	YDR441C YFR004W YFR014C YHR027C YHR200W YMR106C YOR117W
YML028W	YBR081C YCL037C YDL055C YDR188W YDR453C YDR510W YER151C YFR004W YGL122C YGR209C YGR252W YHR200W YJR093C YKL049C YKL152C YLL039C YLR043C YLR430W YML007W YML065W YNL079C YNL178W YNL249C YNL251C YNL255C YNR051C YOR031W YOR101W YOR117W YOR151C YPL106C
YML070W	YDL229W YDR510W YFR004W YGL122C YHR027C YHR200W YIR037W YLL039C
YML106W	YBL032W YDR058C YFR004W YGL122C YHR027C YIL107C YKR022C YLL039C YLR291C YML016C YMR271C YOR117W YPR052C
YML126C	YBR154C YCR053W YDL188C YDL191W YDR510W YER151C YFL039C YFR004W YGL030W YGL031C YGL076C YGR027C YHR027C YHR200W YIL069C YIL094C YJL190C YKL125W YKL180W YLL039C YLR180W YMR059W YMR142C YNL119W YOL127W YOR117W YPR080W
YMR079W	YCR007C YDL001W YDR100W YDR510W YER118C YFR004W YGL053W YGL122C YHR027C YHR076W YHR200W YJL151C YKL091C YLL039C YOR117W YPR113W YPR171W
YMR202W	YER044C YFR004W YGL001C YGR060W YGR175C YHR007C YHR027C YHR200W YKL130C YLL039C YLR100W YML008C YNL280C YOR117W
YMR205C	YBR055C YBR081C YBR194W YCR091W YDL025C YDL047W YDR388W YDR477W YER125W YER148W YER151C YFR004W YFR014C YGL179C YGR240C YGR252W YHR027C YHR082C YHR200W YIL030C YIR007W YJL039C YJL138C YJL164C YJL187C YJL190C YJR022W YKL012W YLL039C YLR019W YLR055C YLR175W YLR180W YLR433C YML121W YMR139W YNL135C YNL307C YNR051C YOL045W YOR117W YOR293W YPL031C YPR080W YPR152C
YMR217W	YAL024C YFR004W YFR034C YHR027C YHR200W YLL039C YNL251C YNR051C YOR117W
YMR235C	YBL016W YBR010W YDR002W YDR192C YDR507C YDR510W YDR523C YER151C YFL002C YFR004W YGL158W YGR218W YHR027C YHR200W YIL115C YIL125W YJL130C YKL048C YLL039C YLR119W YLR262C YLR293C YMR047C YMR300C YNL031C YNL255C YOR112W YOR185C YPL111W YPL141C YPL209C
YMR276W	SPAC20H4.10 YBL032W YBL057C YCL037C YDL140C YDL159W YDL190C YDR394W YDR427W YEL025C YEL037C YER012W YFL010C YFR004W YFR052W YHR027C YHR030C YHR200W YIL106W YIL148W YJL057C YKL145W YKR094C YLL039C YLR113W YLR167W YNL268W YOR042W YOR117W YPL031C YPR002W
YMR300C	YAL012W YAL024C YBR243C YCR057C YER151C YFR004W YGL122C YHR200W YLL039C YML086C YMR235C YNL255C
YNL010W	YCL037C YDR515W YER151C YFR004W YGL122C YHR200W YNL154C YNR051C
YNL014W	YAL024C YCR079W YDL200C YFR004W YFR028C YFR034C YGL116W YGR262C YHR169W YHR183W YHR186C YHR200W YJL141C YJL173C YJR017C YJR068W YLL039C YMR059W YNL255C YOR117W
YNL064C	YAL005C YAL040C YBL075C YBR069C YBR072W YBR169C YCL028W YCL037C YCL057W YDL229W YDR143C YDR172W YER036C YER171W YFL002C YFR004W YGL122C YGL158W YHR027C YHR082C YHR084W YHR200W YIR010W YKL049C YKL101W YLL039C YLR256W YLR362W YML065W YNL073W YNL229C YNL247W YNL251C YNL255C YOL006C YOR117W YOR197W YOR361C YPL106C YPL150W YPL233W YPL240C YPR106W
YNL067W	YBR194W YDL136W YDR412W YDR510W YDR515W YER148W YFL002C YGR086C YGR232W YHR027C YHR200W YKL142W YLL039C YLR432W YML065W YNL246W YNL255C YPL004C YPR152C
YNL220W	YAL005C YDR028C YDR510W YER125W YFL010C YFR004W YGL122C YHR027C YHR200W YIL030C YJL168C YJR017C YKL012W YKL117W YLL039C YNL251C YNL255C YOR011W YOR187W YPL190C YPR152C
YNR043W	YCR057C YFR004W YGR185C YHR027C YHR200W YLL039C YOR057W YOR117W
YOL058W	YBR160W YDR388W YDR510W YFR004W YGL122C YHR027C YHR200W YLL039C YLR221C YOR117W
YOL097C	YAL005C YBR114W YDL229W YFR004W YGL253W YHR027C YHR200W YNL162W
YOR046C	YBR143C YDL165W YDL207W YDR159W YDR311W YDR381W YER165W YER171W YFL002C YFR004W YHR027C YHR200W YIL106W YIL115C YMR255W YMR273C YNR024W YOR117W YPL122C YPL140C YPL169C
YOR168W	TQ(CUG)M YEL060C YFR004W YHR027C YHR200W YKL101W YLL039C YNL015W YNL019C YNL154C YNL255C YOR117W YOR352W
YOR184W	YBR010W YER151C YFR004W YFR014C YGL122C YHR027C YKL129C YKL210W YLL039C YLR096W YNL031C YNR051C YOL045W YPL031C
YOR220W	YCL037C YER177W YFR004W YGL087C YGL112C YGL122C YGL166W YHL030W YHR030C YLR216C
YOR298C-A	YCL037C YDR099W YEL009C YER148W YFR004W YGL122C YHR200W YIR010W YKL198C YKR081C YNL197C YNL255C YOR117W YPL031C
YOR303W	YBL032W YBR009C YDR260C YFR004W YGL122C YHR027C YHR200W YJR109C YLL039C YOR039W YOR117W
YOR317W	YBR010W YBR017C YBR041W YCR079W YDL047W YDR510W YFR004W YGL122C YGR092W YHR027C YJR091C YKR016W YKR026C YLL039C YNL031C YNL123W YOR117W YOR181W
YOR335C	YBR055C YDL229W YDR322C-A YER125W YFR004W YGL158W YHR027C YHR082C YHR200W YIL030C YJL006C YJL057C YJL106W YKL101W YKL168C YLL039C YLR291C YNL135C YNL244C YNL307C YOL013C YOL045W YOR117W YOR244W YOR351C YPL209C YPR106W YPR111W
YOR369C	YCL037C YER151C YFL002C YFR004W YFR034C YGL122C YHR027C YHR152W YIL021W YIR010W YLL036C YLL039C YLR430W YNL207W YNL255C YNR051C YOR151C YOR290C YPL190C
YOR374W	YBR017C YDR510W YFR004W YGL122C YHR027C YKR016W YMR072W YNL255C
YOR375C	YAL062W YCL037C YDR127W YER151C YFL002C YFR004W YGL130W YHR027C YHR200W YIR010W YJL008C YJL124C YKR014C YLL039C YOL013C YOR117W YOR370C YPL228W
YPL028W	YAL005C YBR055C YDR510W YER151C YFR004W YGL009C YGL122C YGR223C YHR027C YHR200W YLL039C YNL244C YNL255C YNR051C YOR117W YPL026C YPR165W
YPL048W	YAL003W YBR118W YDL229W YDR234W YDR314C YFL013C YFR004W YGL122C YGR040W YHR027C YHR082C YHR200W YIL033C YKL056C YKL081W YKL101W YLL026W YLL039C YLR249W YOR117W YPL240C YPR080W
YPL061W	YER089C YER151C YFR004W YGL122C YGR155W YHR027C YHR152W YHR200W YIL094C YIL097W YKL104C YKL152C YKR081C YLL039C YLR180W YNL255C YNR051C YOR117W YOR133W YOR136W YPL204W YPL226W YPR080W
YPL160W	Q0120 YAL062W YCR079W YDL004W YDL160C YDR324C YER111C YER151C YER166W YFR004W YHR027C YHR200W YKR022C YLL039C YML121W YNL244C YNL255C YOL013C YOR117W YPL111W YPR110C
YPL218W	YAL042W YCL037C YCR067C YDL017W YDR100W YDR515W YER151C YFR004W YGL054C YGL122C YGL200C YGR191W YGR284C YHR027C YIL004C YIL109C YKL049C YKR039W YLL039C YLR026C YLR052W YLR078C YLR268W YLR429W YML012W YML064C YML067C YNR026C YNR051C YOL018C YOR117W YPL085W YPR181C
YPL226W	YBL003C YBL032W YBR010W YBR072W YBR081C YBR194W YDL055C YDL095W YDL229W YDR130C YDR142C YDR225W YDR320C YDR510W YER151C YFR004W YGL003C YHR019C YHR027C YHR169W YHR200W YIL142W YIR010W YJL101C YKL049C YKL081W YKR063C YLL039C YLR075W YLR249W YMR223W YNL031C YNR051C YOR063W YOR117W YOR136W YOR185C YPL061W YPR080W YPR152C
YPL231W	YBR194W YDR099W YER151C YER177W YFR004W YGL122C YHL030W YHR027C YHR200W YIL038C YIR010W YKL049C YKL182W YLL039C YML088W YMR099C YNL047C YNL209W YNR051C YOR117W YOR310C YPL106C YPR152C
YPL262W	YFR004W YHR027C YHR200W YLL039C YML095C YMR291W YPR165W
YPR033C	YBR059C YER151C YFR004W YHR027C YLL039C YPL240C
YPR035W	YBR126C YDR171W YER151C YFR004W YFR014C YGL122C YGL179C YGR040W YHR027C YHR200W YIL030C YIR037W YJL006C YKL168C YLL039C YLR048W YMR236W YNL288W YNR051C YOL045W YOR117W YOR351C YPL031C
YPR043W	YBL032W YCL037C YDL195W YDR515W YER006W YER151C YFR034C YGL122C YGR275W YHL030W YHR200W YLL039C YML065W YNL255C YNR051C
YPR069C	YER151C YFR004W YFR028C YGL122C YGL237C YHR200W YLL039C YLR146C YNR051C YOL013C
YPR074C	YBR117C YDR510W YER125W YFL010C YFR004W YHL014C YHR027C YHR200W YIR007W YJL168C YJR017C YJR059W YJR093C YKL012W YKL130C YLL039C YLR153C YNL209W YOR117W YPR152C
YPR118W	YDR346C YHR027C YHR152W YHR200W YJL217W
YPR145W	YAL024C YBR274W YCL037C YFR004W YFR034C YGR124W YHR027C YHR200W YLL039C YMR117C YOR117W YPL204W
YPR158W-B	YER151C YNR051C
YPR163C	YAL005C YDL229W YDR130C YDR429C YFR004W YHR027C YHR200W YIL144W YIR010W YML010W YNL209W YNL255C YOR117W YPR144C
YPR183W	YBL032W YBR070C YCL037C YDL226C YDR275W YDR510W YDR515W YER179W YFR004W YFR028C YHR027C YKL004W YKL212W YKR046C YLL039C YML008C YML065W YMR148W YNL321W YOL018C YOR117W YOR285W YPL190C
	GOID	Term	P-value	The genes annotated to this term
BP	GO:0044281	small molecule metabolic process	5.11393e-68	YPR145W, YOL097C, YMR202W, YPL218W, YBL099W, YLR060W, YPL160W, YJL060W, YBR127C, YLR303W, YHR104W, YPR118W, YGR124W, YDR037W, YDR300C, YKR043C, YHR025W, YHR020W, YBL076C, YDL131W, YCR012W, YOR374W, YER069W, YCL050C, YDR502C, YOR303W, YGL234W, YER090W, YOR335C, YJL167W, YHR174W, YGR192C, YOR184W, YLR134W, YER070W, YMR205C, YJR109C, YMR217W, YGL008C, YDL171C, YDR321W, YHR190W, YPL226W, YCL030C, YNL…
	GO:0019752	carboxylic acid metabolic process	1.87683e-42	YPR145W, YOL097C, YLR060W, YPL160W, YJL060W, YLR303W, YPR118W, YGR124W, YDR037W, YDR300C, YHR025W, YHR020W, YBL076C, YDL131W, YOR374W, YER069W, YDR502C, YOR303W, YER090W, YOR335C, YOR184W, YLR134W, YJR109C, YMR217W, YDL171C, YDR321W, YCL030C, YPL262W, YPR035W, YDR023W, YGL202W, YPL231W, YKL182W, YEL071W, YOR317W, YGR094W, YLR044C, YGL009C, YFR030W, YLL018C, YAL038W, YGL026C, YLR355C, YGR061C, YPL…
	GO:0043436	oxoacid metabolic process	1.87683e-42	YPR145W, YOL097C, YLR060W, YPL160W, YJL060W, YLR303W, YPR118W, YGR124W, YDR037W, YDR300C, YHR025W, YHR020W, YBL076C, YDL131W, YOR374W, YER069W, YDR502C, YOR303W, YER090W, YOR335C, YOR184W, YLR134W, YJR109C, YMR217W, YDL171C, YDR321W, YCL030C, YPL262W, YPR035W, YDR023W, YGL202W, YPL231W, YKL182W, YEL071W, YOR317W, YGR094W, YLR044C, YGL009C, YFR030W, YLL018C, YAL038W, YGL026C, YLR355C, YGR061C, YPL…
CC	GO:0005737	cytoplasm	3.24771e-20	YOL097C, YMR202W, YLR060W, YKL056C, YGR027C, YBR011C, YBR127C, YLR303W, YHR104W, YDR300C, YBL076C, YML028W, YJL111W, YDL131W, YJL008C, YER069W, YDR033W, YCL050C, YOR303W, YLR134W, YER070W, YDR074W, YMR205C, YKL210W, YJR109C, YMR217W, YDR321W, YHR190W, YNL220W, YMR079W, YPL262W, YER143W, YPR158W-B, YJR094W-A, YGL037C, YML106W, YDR023W, YCL040W, YEL071W, YHR021C, YOR220W, YOR317W, YJR105W, YML070W,…
	GO:0001950	plasma membrane enriched fraction	5.81206e-12	YOR317W, YHR174W, YGR192C, YAL038W, YCR004C, YDR158W, YGR254W, YGL008C, YLR303W, YBR196C, YDR050C, YLL050C, YER091C, YLR058C, YCR012W, YCL040W, YDR033W, YIL118W
	GO:0005622	intracellular	3.40993e-10	YOL097C, YMR202W, YDL084W, YLR060W, YKL056C, YGR027C, YBR011C, YBR127C, YLR303W, YHR104W, YDR300C, YBL076C, YML028W, YJL111W, YDL131W, YJL008C, YER069W, YDR033W, YCL050C, YOR303W, YLR134W, YER070W, YDR074W, YMR205C, YKL210W, YJR109C, YMR217W, YDR321W, YHR190W, YCL030C, YNL220W, YMR079W, YPL262W, YER143W, YPR158W-B, YJR094W-A, YGL037C, YML106W, YDR023W, YCL040W, YEL071W, YHR021C, YOR220W, YOR317W,…
MF	GO:0003824	catalytic activity	5.6274e-31	YOL097C, YMR202W, YDL084W, YLR060W, YBR011C, YBR127C, YLR303W, YHR104W, YDR300C, YHR025W, YBL076C, YML028W, YDL131W, YER069W, YCL050C, YDR502C, YOR303W, YLR134W, YER070W, YDR074W, YMR205C, YKL210W, YJR109C, YMR217W, YDR321W, YHR190W, YCL030C, YNL220W, YPL262W, YER143W, YPR158W-B, YGL037C, YML106W, YDR023W, YCL040W, YEL071W, YOR317W, YJR105W, YML070W, YAL038W, YKL152C, YLR354C, YNL014W, YIL053W, Y…
	GO:0036094	small molecule binding	4.42669e-28	YPR145W, YOL097C, YPL218W, YDL084W, YBL099W, YIR036C, YLR060W, YPL160W, YPR163C, YJL060W, YBR127C, YLR303W, YGR124W, YDR037W, YDR300C, YHR025W, YHR020W, YBL076C, YJL111W, YCR012W, YJL008C, YER069W, YCL050C, YDR502C, YOR303W, YGL234W, YOR335C, YGR192C, YOR184W, YLR134W, YER070W, YMR205C, YKL210W, YJR109C, YMR217W, YDL171C, YGL008C, YPL226W, YCL030C, YNL220W, YPR158W-B, YPR035W, YGL202W, YDR023W, Y…
	GO:0000166	nucleotide binding	3.81144e-23	YPR145W, YOL097C, YPL218W, YDL084W, YBL099W, YIR036C, YLR060W, YPL160W, YPR163C, YBR127C, YGR124W, YDR037W, YDR300C, YHR025W, YHR020W, YBL076C, YJL111W, YCR012W, YJL008C, YER069W, YCL050C, YDR502C, YOR303W, YGL234W, YOR335C, YGR192C, YER070W, YMR205C, YKL210W, YJR109C, YMR217W, YDL171C, YGL008C, YPL226W, YCL030C, YNL220W, YPR158W-B, YPR035W, YDR023W, YCL040W, YPL231W, YOR317W, YDR226W, YGR094W, Y…
Group 142 Density 0			P-value 0.000341268200123567
members	partners
YDR065W	YFL002C YPR116W
YJL023C	YDL229W YGL122C YGL157W YML091C YPR116W
YLL033W	YDR478W YFR014C YPR116W
YLR091W	YBL032W YPR116W
YLR419W	YBL032W YGL073W YMR117C YNL255C YNR051C
	GOID	Term	P-value	The genes annotated to this term
BP	GO:0000002	mitochondrial genome maintenance	0.000341268	YDR065W, YLR091W
CC	GO:0005739	mitochondrion	0.00449177	YJL023C, YDR065W, YLR091W, YLR419W
MF	GO:0003674	molecular_function	0.0031167	YJL023C, YDR065W, YLR091W, YLL033W, YLR419W
Group 143 Density 0			P-value 0.000353175294974176
members	partners
YGL082W	YBL016W YBR223C YGL122C YLR166C
YJL186W	YHR181W YLL039C YLR166C YOL018C
YPL053C	YDR190C YGL122C YIR033W YIR038C YKR088C YLR166C
	GOID	Term	P-value	The genes annotated to this term
BP	GO:0006486	protein glycosylation	0.000353175	YJL186W, YPL053C
	GO:0043413	macromolecule glycosylation	0.000353175	YJL186W, YPL053C
CC	GO:0005624	membrane fraction	0.00313223	YGL082W, YPL053C
	GO:0005626	insoluble fraction	0.00313223	YGL082W, YPL053C
	GO:0000267	cell fraction	0.00415323	YGL082W, YPL053C
MF	GO:0000030	mannosyltransferase activity	0.000138724	YJL186W, YPL053C
	GO:0016758	transferase activity, transferring hexosyl groups	0.00050905	YJL186W, YPL053C
Group 144 Density 0			P-value 1.47288760056169E-07
members	partners
YDR379W	YAL041W YBL032W YBR160W YBR194W YBR200W YDL161W YDL229W YER021W YFR028C YGR152C YHL007C YJL164C YKL166C YKL172W YKR009C YLR206W YLR229C YNL201C YNL307C YPL031C YPR152C
YKL092C	YCL027W YGR152C YLL039C YLR182W YNL113W YPL256C
YOR127W	YAL011W YBR109C YBR160W YDL161W YDR186C YDR309C YER021W YER118C YGL106W YGL122C YGR152C YHL042W YIR010W YJL185C YLR229C YNL298W YOR049C YOR326W YPL055C YPL256C YPR165W
	GOID	Term	P-value	The genes annotated to this term
BP	GO:0007114	cell budding	1.37663e-06	YKL092C, YOR127W, YDR379W
	GO:0019954	asexual reproduction	1.37663e-06	YKL092C, YOR127W, YDR379W
	GO:0007264	small GTPase mediated signal transduction	1.75602e-06	YKL092C, YOR127W, YDR379W
CC	GO:0032176	split septin rings	1.47289e-07	YOR127W, YDR379W
	GO:0000399	cellular bud neck septin structure	1.14753e-05	YOR127W, YDR379W
	GO:0032161	cleavage apparatus septin structure	1.14753e-05	YOR127W, YDR379W
MF	GO:0005099	Ras GTPase activator activity	6.7516e-08	YKL092C, YOR127W, YDR379W
	GO:0005100	Rho GTPase activator activity	8.09326e-06	YOR127W, YDR379W
	GO:0030234	enzyme regulator activity	5.65745e-05	YKL092C, YOR127W, YDR379W
Group 149 Density 0			P-value 1.83898650746619E-06
members	partners
YDL113C	YBL025W YBR160W YDR100W YER018C YER157W YFR028C YFR040W YGL122C YGL223C YGR120C YGR172C YHR082C YJL036W YLR191W YLR315W YNL263C YPR049C YPR105C
YDL226C	YBR164C YDL192W YDR510W YER118C YFL039C YFR004W YGL198W YGR172C YJL036W YJL151C YKR088C YLL039C YLR026C YOL129W YOR181W YOR327C YPR113W YPR183W
YDR425W	YBL032W YBR009C YBR010W YGL059W YGL122C YGL161C YGL198W YJL036W YJL164C YJR110W YKL166C YLL039C YNL030W YNL031C YNL197C YNL243W
YER074W-A	YGL122C YGR172C YNL263C
YOL103W	YGR172C YJL165C
YOR132W	YAL005C YGL122C YGL198W YGR172C YHR012W YIR010W YJL036W YJL053W YJL154C YJL178C YMR004W YNL093W YNL263C YOR034C YOR069W YPR171W
YPL095C	YCL037C YDR100W YDR515W YGL122C YGL198W YGR172C
	GOID	Term	P-value	The genes annotated to this term
BP	GO:0042147	retrograde transport, endosome to Golgi	3.23857e-06	YOR132W, YDR425W, YDL113C
	GO:0016192	vesicle-mediated transport	1.26432e-05	YDL226C, YOR132W, YDR425W, YDL113C, YER074W-A
	GO:0016197	endosome transport	5.93231e-05	YOR132W, YDR425W, YDL113C
CC	GO:0005768	endosome	7.58668e-06	YDL226C, YOR132W, YDR425W, YDL113C
MF	GO:0032266	phosphatidylinositol-3-phosphate binding	1.83899e-06	YOR132W, YDR425W, YDL113C
Group 155 Density 0			P-value 0.00012628565062776
members	partners
YKR046C	YBL057C YBR017C YBR039W YBR041W YBR230C YCL037C YDL065C YDR329C YDR424C YDR479C YDR523C YER004W YER019W YFR004W YGL020C YGL067W YGL137W YGR028W YGR183C YHR003C YHR083W YHR190W YIL043C YIL062C YIL065C YIL124W YIR004W YJL082W YJL112W YJL210W YJR091C YKL049C YKL150W YKR026C YLL039C YLR191W YLR324W YLR348C YML048W YMR110C YMR204C YMR256C YNL003C YNL131W YNL214W YNL237W YNL256W YNL258C YOL109W YPL170W…
YML008C	RP11-269C23.2 YBL057C YBR039W YBR041W YBR168W YBR230C YDL065C YDL089W YDR244W YDR265W YDR479C YER004W YER044C YER110C YFR004W YGL001C YGL012W YGL020C YGL219C YGR004W YGR028W YGR060W YGR183C YHR003C YHR007C YHR027C YHR072W YHR117W YHR190W YHR200W YIL043C YIL062C YIL065C YIL124W YIR004W YJL054W YJL082W YJL112W YJL210W YJR010C-A YJR091C YKL120W YKL150W YLL006W YLL039C YLR056W YLR100W YLR191W YLR292C…
YMR148W	YBL032W YBR039W YBR230C YDL065C YDR515W YER004W YGL122C YGR077C YIL124W YJL082W YLR348C YML048W YMR110C YNL131W YNL237W YNL258C YPL170W YPR002W YPR183W
	GOID	Term	P-value	The genes annotated to this term
BP	No terms were found for this aspect with a corrected P-value <= 0.05.
CC	GO:0005811	lipid particle	0.000126286	YML008C, YKR046C
MF	No terms were found for this aspect with a corrected P-value <= 0.05.
Group 157 Density 6.666667e-02			P-value 0.0000890593403268097
members	partners
YBR201W	YBR170C YDL126C YDR057W YDR411C YGR048W YLR207W YML013W YML029W YMR297W YOL013C
YDR049W	YBR170C YDL126C YDL190C YER036C YGL122C YGR048W YKL204W YKL213C YML013W YOL139C
YDR330W	YBR160W YBR170C YDL126C YDR510W YER012W YGL122C YGL180W YGR003W YGR048W YGR268C YHL007C YHR082C YHR135C YJL187C YKR094C YLL039C YNL154C YNL307C YOL133W YPL018W
YFL044C	YAL005C YBL058W YBR170C YDL126C YDL190C YGL122C YGR048W YKL020C YKL213C YLL039C YOR153W
YKL020C	YBL032W YBR170C YDL126C YER125W YFL044C YGR048W YGR224W YKL213C YLL039C YLR233C YOR124C YOR250C
YNL155W	YBL058W YBR170C YCR091W YDL126C YEL026W YGR092W YHR079C YHR082C YHR154W YJL014W YJL095W YNL154C YOR201C
	GOID	Term	P-value	The genes annotated to this term
BP	GO:0006508	proteolysis	8.90593e-05	YFL044C, YDR049W, YBR201W, YDR330W
	GO:0010498	proteasomal protein catabolic process	9.59229e-05	YDR049W, YBR201W, YDR330W
	GO:0030433	ER-associated protein catabolic process	0.00074831	YDR049W, YBR201W
CC	No terms were found for this aspect with a corrected P-value <= 0.05.
MF	GO:0008270	zinc ion binding	0.00226986	YFL044C, YDR049W, YNL155W
	GO:0046914	transition metal ion binding	0.00448327	YFL044C, YDR049W, YNL155W
Group 159 Density 0			P-value 0.000717041906771493
members	partners
YBR056W	YER125W YFL010C YFR004W YFR007W YGL122C YGL227W YIL030C YJL168C YJR017C YKL012W YLL039C YOR011W YPR152C
YIL060W	YER125W YFL010C YGL122C YIL030C YJL168C YJR017C YKL012W YOR011W YPR152C
YJR096W	YAL005C YBR251W YCL037C YDR175C YDR499W YER125W YFL010C YGL122C YGL158W YGL227W YIL030C YIL035C YJL168C YJR017C YKL012W YKL101W YOR011W YPL150W YPR152C
YOL056W	YDL229W YFL010C YGL122C YMR138W YOR011W YPR152C
YOR143C	YER125W YIL030C YKL012W YOR011W YPR152C
	GOID	Term	P-value	The genes annotated to this term
BP	GO:0046365	monosaccharide catabolic process	0.000717042	YJR096W, YOL056W
	GO:0046164	alcohol catabolic process	0.000940646	YJR096W, YOL056W
	GO:0005975	carbohydrate metabolic process	0.00145507	YJR096W, YOL056W, YBR056W
CC	No terms were found for this aspect with a corrected P-value <= 0.05.
MF	No terms were found for this aspect with a corrected P-value <= 0.05.
Group 163 Density 0			P-value 0.0000352459723013744
members	partners
YAR064W	YBR109C
YBR050C	YBR109C YDR099W YER133W YGL122C
YBR213W	YBR109C
YFL004W	YBR109C YDL248W YER072W YGL122C YLL039C YNL255C
YFL010W-A	YBR109C
YGL063W	YBR109C YLL050C
YGL242C	YBR109C YGL122C YKL035W YKL129C YKR099W YMR109W
YGR144W	YBR109C YIL051C YLR291C YNL189W YPL031C
YKL175W	YBR109C YFL041W YLL039C YPR198W
YLL051C	YBL032W YBR109C
YLR356W	YBR109C YGL106W YGL122C YLL039C YLR314C
YLR443W	YBR109C YCL037C YGL122C YKL166C
YMR200W	YBL032W YBR109C YHR101C YJL034W YLR378C YOR021C YPR159W
YMR250W	YAL024C YBR059C YBR109C YGL122C YJL124C YLL039C YPL031C
YNL202W	YBR109C YKL101W YLL039C
YPL019C	YBR010W YBR109C YER072W YGL122C YGR260W YHR060W YJR059W YKL049C YLL039C YNL031C
	GOID	Term	P-value	The genes annotated to this term
BP	GO:0006797	polyphosphate metabolic process	0.000262034	YPL019C, YFL004W
CC	GO:0033254	vacuolar transporter chaperone complex	3.5246e-05	YPL019C, YFL004W
	GO:0000329	fungal-type vacuole membrane	0.000212577	YPL019C, YLL051C, YFL004W, YKL175W
MF	GO:0016628	oxidoreductase activity, acting on the CH-CH group of donors, NAD or NADP as acceptor	0.000383194	YBR213W, YNL202W
Group 164 Density 0			P-value 4.90962533520563E-07
members	partners
YGR080W	YBR010W YCL037C YER155C YFL029C YFL039C YGL122C YGR068C YIL034C YKL007W YNL031C YNL110C YNL138W YOR181W
YHR070W	YBL105C YFR021W YJL154C YLL039C YNL138W YPL240C
YIL113W	YDL159W YER155C YHR030C YKL161C YLL019C YNL138W
YOR087W	YGL122C YLL039C YNL138W
YOR122C	YBR200W YCL037C YDR515W YFL039C YGL122C YIL159W YNL138W YNL271C
	GOID	Term	P-value	The genes annotated to this term
BP	GO:0042989	sequestering of actin monomers	4.90963e-07	YGR080W, YOR122C
	GO:0030837	negative regulation of actin filament polymerization	1.02941e-05	YGR080W, YOR122C
	GO:0032272	negative regulation of protein polymerization	1.37211e-05	YGR080W, YOR122C
CC	GO:0015629	actin cytoskeleton	0.00178824	YGR080W, YOR122C
MF	GO:0003785	actin monomer binding	1.47243e-06	YGR080W, YOR122C
	GO:0008092	cytoskeletal protein binding	0.00162873	YGR080W, YOR122C
Group 165 Density 0			P-value 0.00118140349064245
members	partners
YFL036W	YDL044C YDR194C YIR010W YJL034W YJR045C YJR144W YLR067C YLR139C YLR259C YLR439W YML025C YMR136W YMR228W YOR017W
YLR233C	YAL028W YAR007C YCL043C YDL220C YDR087C YDR194C YDR496C YER077C YFR027W YGL122C YGL201C YIL009C-A YJL019W YJL109C YKL014C YKL020C YKR024C YKR081C YLR006C YLR175W YLR196W YLR318W YML038C YNL132W YNL229C YOR201C YOR319W YPL012W
YPL055C	YAR018C YBL032W YBL085W YBL104C YBR009C YBR059C YBR245C YBR296C-A YCR033W YCR092C YDL074C YDR097C YDR194C YDR293C YDR356W YDR385W YDR432W YER032W YER155C YFR028C YGL120C YGL122C YHR082C YHR172W YHR186C YIL129C YJL076W YJL173C YJR066W YJR144W YKL042W YLR096W YML010W YML017W YML032C YMR055C YNL088W YNL112W YNL126W YNL132W YNL161W YNL225C YNL248C YOL090W YOR017W YOR127W YOR204W YOR233W YOR257W YOR34…
	GOID	Term	P-value	The genes annotated to this term
BP	GO:0006260	DNA replication	0.0011814	YPL055C, YLR233C
CC	No terms were found for this aspect with a corrected P-value <= 0.05.
MF	No terms were found for this aspect with a corrected P-value <= 0.05.
Group 168 Density 0			P-value 0.00705461917753252
members	partners
YGR196C	YBR260C YDL080C YIL131C YNL094W YOR231W YPL153C
YJL197W	YDR159W YGR252W YHR005C YIL131C YJR031C YNL255C
YMR144W	YGR142W YIL131C YNL154C
	GOID	Term	P-value	The genes annotated to this term
BP	GO:0008150	biological_process	0.00705462	YJL197W, YMR144W, YGR196C
CC	No terms were found for this aspect with a corrected P-value <= 0.05.
MF	No terms were found for this aspect with a corrected P-value <= 0.05.
Group 171 Density 0			P-value 0.000018852406369125
members	partners
YER007C-A	YBL072C YDR326C YER151C YFR004W YJR014W YJR145C YKL028W YML063W YNL178W
YGR081C	YBL072C YBR010W YBR189W YBR247C YCL037C YCR106W YDL060W YER155C YGL122C YGR214W YIL069C YJL130C YJR145C YMR308C YNL255C YPL012W YPL240C
YKL143W	YBR247C YCR031C YDL060W YGR218W YJL191W YML121W YMR047C YNL178W YNL207W YNL255C YOL040C YOR056C YPL204W YPL239W YPL266W
YPR112C	YBR187W YBR247C YCL031C YDL165W YDL229W YDR510W YER082C YGR090W YGR214W YHR196W YJL010C YLR129W YML063W YMR230W YNL075W YNL178W YNL255C YPL217C YPL240C YPR154W
	GOID	Term	P-value	The genes annotated to this term
BP	GO:0042254	ribosome biogenesis	1.88524e-05	YGR081C, YER007C-A, YPR112C, YKL143W
	GO:0071843	cellular component biogenesis at cellular level	7.4815e-05	YGR081C, YER007C-A, YPR112C, YKL143W
	GO:0000462	maturation of SSU-rRNA from tricistronic rRNA transcript (SSU-rRNA, 5.8S rRNA, LSU-rRNA)	0.00134448	YGR081C, YPR112C
CC	GO:0030688	preribosome, small subunit precursor	1.94015e-05	YGR081C, YKL143W
	GO:0030529	ribonucleoprotein complex	0.000182285	YGR081C, YER007C-A, YPR112C, YKL143W
	GO:0030686	90S preribosome	0.00118398	YGR081C, YPR112C
MF	No terms were found for this aspect with a corrected P-value <= 0.05.
Group 175 Density 0			P-value 8.09326461287759E-06
members	partners
YBR185C	YCL032W YLR439W YNL177C YOL027C YPR175W
YBR278W	YCL032W YCL037C YDL102W YDR121W YDR381W YDR388W YGL122C YMR224C YNL255C YNL262W YOL077C YPR175W
YDL069C	YJL095W YKL164C YPR175W
	GOID	Term	P-value	The genes annotated to this term
BP	GO:0097033	mitochondrial respiratory chain complex III biogenesis	8.09326e-06	YDL069C, YBR185C
	GO:0010822	positive regulation of mitochondrion organization	1.14753e-05	YDL069C, YBR185C
	GO:0070131	positive regulation of mitochondrial translation	1.14753e-05	YDL069C, YBR185C
CC	No terms were found for this aspect with a corrected P-value <= 0.05.
MF	No terms were found for this aspect with a corrected P-value <= 0.05.
Group 176 Density 0			P-value 0.03698954925971
members	partners
YBR131W	YCL010C YDL077C YDR145W YGL124C YML001W YOR106W
YDL073W	YBR111W-A YCL010C YER018C YER118C
YGL262W	YCL010C
YLR390W	YBL032W YDR145W YGL122C
YOR296W	YBL032W YBR111W-A YGL122C YIL107C
	GOID	Term	P-value	The genes annotated to this term
BP	No terms were found for this aspect with a corrected P-value <= 0.05.
CC	No terms were found for this aspect with a corrected P-value <= 0.05.
MF	GO:0003674	molecular_function	0.0369895	YOR296W, YBR131W, YDL073W, YLR390W, YGL262W
Group 178 Density 0			P-value 8.23783268944052E-06
members	partners
YAR009C	YBL032W YHL002W YLL039C YMR186W YNL118C YNL209W YOL133W
YER035W	YBR142W YDL148C YDL160C YDR381W YEL015W YLR150W YNL118C YNL308C YOL149W YPL004C
YGL222C	YBL032W YCL037C YGL122C YNL118C YNL255C YOL149W
YIR014W	YNL118C
YIR024C	YDR376W YGL122C YHR143W-A YNL118C YNL248C YNL255C
YKL133C	YBL045C YGL122C YNL118C
YLR451W	YBL016W YCR042C YFR014C YGL180W YHR135C YHR166C YNL118C
YOL151W	YDL229W YGL122C YNL118C
	GOID	Term	P-value	The genes annotated to this term
BP	GO:0032056	positive regulation of translation in response to stress	8.23783e-06	YER035W, YGL222C
	GO:0000290	deadenylation-dependent decapping of nuclear-transcribed mRNA	6.15517e-05	YER035W, YGL222C
	GO:0000184	nuclear-transcribed mRNA catabolic process, nonsense-mediated decay	0.000669135	YER035W, YGL222C
CC	No terms were found for this aspect with a corrected P-value <= 0.05.
MF	GO:0003729	mRNA binding	0.00309218	YER035W, YGL222C
Group 180 Density 0			P-value 0.000123397863243335
members	partners
YBR179C	YDR142C YDR470C YJL092W YKL116C YLL039C YLR368W YOR211C
YDL091C	YDL126C YER125W YGL122C YJL092W YLL039C
YDR004W	YDR076W YER095W YER173W YGL122C YHR154W YJL092W YLR394W
YDR078C	YBL032W YGL122C YHL006C YJL092W YLR376C
YDR221W	YBL032W YBR229C YHR193C YJL092W YPL037C
YDR458C	YBL079W YJL092W YJR042W YMR129W YNL154C
YER014W	YBR010W YDL156W YGL122C YJL092W YNL031C
YGL101W	YJL092W
YGL192W	YBL032W YBR057C YCL055W YJL092W YOR125C
YGR230W	YGL122C YJL092W
YHR202W	YJL092W YKL012W YPL153C YPL240C
YIL031W	YBL032W YBR160W YCR086W YDR510W YGL122C YJL092W YMR001C
YJL170C	YCL037C YFR004W YJL092W YPL240C
YKL077W	YGR092W YHR135C YJL092W
YKR061W	YJL092W
YLR035C	YGL122C YGL162W YJL092W YLL024C YMR167W YOR261C YPR034W
YLR154W-C	YBL007C YGL122C YJL092W YML110C
YLR401C	YBR160W YBR248C YDR118W YIR035C YJL092W YNL154C
YMR136W	YBL032W YFL036W YFR010W YJL092W
YNL327W	YBL032W YCL037C YGL122C YJL092W YLR452C YNL197C
YOR137C	YBL032W YJL092W YMR297W YNL197C
YPL092W	YDR456W YHL048W YHR042W YJL092W
YPL121C	YER095W YER179W YHR079C-A YJL092W YKR016W
	GOID	Term	P-value	The genes annotated to this term
BP	GO:0000707	meiotic DNA recombinase assembly	0.000123398	YPL121C, YDR004W
	GO:0045003	double-strand break repair via synthesis-dependent strand annealing	0.000258	YPL121C, YDR004W
CC	No terms were found for this aspect with a corrected P-value <= 0.05.
MF	No terms were found for this aspect with a corrected P-value <= 0.05.
Group 183 Density 0			P-value 8.49639694537854E-19
members	partners
snR10	YBR189W YDL208W YDL213C YDR450W YHR089C YML026C YNL251C YPL081W YPL190C
snR128	YBL002W YBR009C YBR189W YDL213C YDR224C YHR089C YML026C YNL030W YNL251C YPL081W YPL190C
snR17a	YBL002W YBL004W YBR189W YDL213C YDR224C YDR449C YDR450W YHR089C YHR148W YIL091C YJR002W YLR409C YML026C YNL030W YNL075W YNL308C YOR004W YPL081W YPL190C YPL217C
snR17b	YBL002W YBL004W YBR189W YDL213C YDR224C YDR449C YDR450W YHR089C YHR148W YIL091C YJR002W YLR409C YML026C YNL030W YNL075W YNL308C YOR004W YPL081W YPL217C
snR24	YBL002W YBR189W YDR224C YML026C YNL030W YPL081W
snR30	YBL002W YBR009C YBR189W YDL208W YDL213C YDR224C YDR404C YDR450W YHR072W-A YHR089C YLR175W YML026C YNL030W YNL308C YOR004W YPL081W YPL190C YPR080W
snR35	YBL002W YBR189W YDL213C YDR224C YDR450W YHR089C YML026C YNL030W YNL251C YPL081W YPL190C
snR37	YBL002W YBR189W YDL208W YDR224C YHR089C YML026C YNL030W YPL081W
snR4	YBL002W YBR009C YBR189W YDL213C YDR224C YDR450W YHR089C YML026C YNL030W YNL251C YPL081W YPL190C
snR84	YBR189W YDR450W YHR089C YML026C YPL081W
	GOID	Term	P-value	The genes annotated to this term
BP	GO:0006364	rRNA processing	1.53193e-11	snR17a, snR17b, snR30, snR84, snR128, snR24, snR35, snR10, snR37
	GO:0034470	ncRNA processing	1.96646e-10	snR17a, snR17b, snR30, snR84, snR128, snR24, snR35, snR10, snR37
	GO:0042254	ribosome biogenesis	2.09722e-10	snR17a, snR17b, snR30, snR84, snR128, snR24, snR35, snR10, snR37
CC	GO:0005732	small nucleolar ribonucleoprotein complex	8.4964e-19	snR17a, snR17b, snR30, snR84, snR4, snR128, snR24, snR35, snR10, snR37
	GO:0030529	ribonucleoprotein complex	4.328e-10	snR17a, snR17b, snR30, snR84, snR4, snR128, snR24, snR35, snR10, snR37
	GO:0031429	box H/ACA snoRNP complex	6.66105e-10	snR35, snR30, snR84, snR37, snR10
MF	GO:0019843	rRNA binding	1.22052e-15	snR17a, snR17b, snR30, snR84, snR128, snR24, snR35, snR10, snR37
	GO:0000944	base pairing with rRNA	8.72971e-15	snR17a, snR17b, snR84, snR128, snR24, snR35, snR10, snR37
	GO:0030555	RNA modification guide activity	3.09871e-10	snR24, snR35, snR84, snR37, snR10, snR128
Group 186 Density 0			P-value 0.0000884330781287865
members	partners
YCL067C	YBR112C YCL066W YCR084C YCR097W YMR043W
YDL240W	YAR014C YJL020C YLR229C YLR438C-A YNL090W YPR165W
YDR043C	YBL032W YBR112C YCR084C YDR477W YHL027W YIL035C YOR061W
YDR259C	YAL017W YAR014C YBL032W YBL084C YBR112C YBR270C YCR084C YDR311W YER114C YGL122C YGL181W YGR066C YHR079C YHR082C YIL153W YJL106W YJL164C YKL071W YLR423C YLR447C YNL092W YNL154C YNL307C
YER115C	YAR014C YBR160W YCR077C YDL028C YGL122C YJL020C YLR310C YML109W
YJR115W	YAR014C YBL007C YDR388W YER118C YGL158W YJL020C YNL197C
YKL043W	YBL032W YBR112C YBR160W YCR084C YDR510W YPL042C
YMR018W	YAR014C YGL122C
YPR068C	YBR112C YCR084C YIL026C YJL074C YOR083W
	GOID	Term	P-value	The genes annotated to this term
BP	GO:0006357	regulation of transcription from RNA polymerase II promoter	8.84331e-05	YDR043C, YKL043W, YDR259C, YCL067C, YPR068C
CC	No terms were found for this aspect with a corrected P-value <= 0.05.
MF	GO:0000989	transcription factor binding transcription factor activity	0.000551879	YDR043C, YDR259C, YCL067C
Group 190 Density 0			P-value 0.00118140349064245
members	partners
YDR300C	YAL024C YBR009C YER107C YER151C YFR004W YGR092W YHR164C YLL039C YML095C YNL177C YNL255C YNL265C YNR051C YPL240C YPR137W
YKL113C	YAR007C YBR088C YBR098W YDL164C YDL229W YDR510W YHR164C YJR091C YML061C YMR229C YMR308C YOR144C
YLR234W	YBL105C YBR010W YDL156W YDR097C YGL017W YGL122C YHR164C YMR190C YNL031C YPL024W
	GOID	Term	P-value	The genes annotated to this term
BP	GO:0006260	DNA replication	0.0011814	YLR234W, YKL113C
CC	No terms were found for this aspect with a corrected P-value <= 0.05.
MF	No terms were found for this aspect with a corrected P-value <= 0.05.
Group 200 Density 0			P-value 0.000586202226387297
members	partners
YER125W	YBL007C YBL101C YBR005W YBR009C YBR010W YBR011C YBR056W YBR083W YBR109C YBR118W YBR154C YBR177C YBR182C YBR196C YBR222C YBR290W YBR299W YCL028W YCL043C YCR009C YCR016W YCR024C YDL012C YDL029W YDL051W YDL078C YDL086W YDL091C YDL101C YDL123W YDL130W-A YDL140C YDL203C YDL230W YDL244W YDR003W YDR034C-C YDR047W YDR061W YDR120C YDR138W YDR139C YDR165W YDR170C YDR226W YDR234W YDR256C YDR296W YDR343C YDR…
YIL030C	YBR011C YBR056W YBR170C YBR295W YBR299W YCL043C YCL047C YCR016W YCR053W YDL051W YDL086W YDL126C YDL230W YDR364C YDR411C YDR456W YDR479C YER070W YER152C YGL039W YGL062W YGL184C YGL245W YGR048W YGR111W YGR287C YHL033C YHR009C YHR063C YHR112C YHR174W YHR183W YIL060W YIL070C YIR034C YJL167W YJL218W YJR019C YJR096W YKL145W YKL209C YKR097W YLL024C YLL026W YLL039C YLR027C YLR134W YLR150W YLR208W YLR231C…
YKL012W	YAL005C YBR056W YBR109C YBR119W YBR299W YCL047C YCR016W YCR024C YCR031C YDL029W YDL051W YDL078C YDL086W YDL087C YDL131W YDL140C YDL214C YDL230W YDR044W YDR061W YDR139C YDR212W YDR235W YDR240C YDR432W YEL047C YER018C YER029C YER152C YER165W YFL017W-A YGL062W YGL094C YGL122C YGL158W YGL184C YGL200C YGL208W YGL245W YGR013W YGR074W YGR111W YGR180C YGR200C YGR264C YGR287C YHL042W YHR009C YHR043C YHR06…
YOR011W	YBL032W YBR011C YBR056W YDR432W YGL122C YHR063C YHR174W YIL060W YIR009W YJL167W YJR096W YKL130C YMR196W YNL117W YNL220W YOL056W YOR143C YOR209C YOR251C YOR323C YPL171C YPL240C
	GOID	Term	P-value	The genes annotated to this term
BP	GO:0010498	proteasomal protein catabolic process	0.00172639	YIL030C, YER125W
	GO:0043161	proteasomal ubiquitin-dependent protein catabolic process	0.00172639	YIL030C, YER125W
CC	GO:0000151	ubiquitin ligase complex	0.000586202	YIL030C, YER125W
MF	GO:0004842	ubiquitin-protein ligase activity	0.000938748	YIL030C, YER125W
	GO:0019787	small conjugating protein ligase activity	0.0011327	YIL030C, YER125W
	GO:0016881	acid-amino acid ligase activity	0.00142847	YIL030C, YER125W
Group 201 Density 0			P-value 0.00374334383682739
members	partners
At1g23260	YDR092W
At3g52560	YDR092W
YER061C	YDR092W YPL031C
YHR137W	YDR092W YGL179C YHR183W YLL039C YLR278C YOR310C YPL031C
	GOID	Term	P-value	The genes annotated to this term
BP	GO:0019752	carboxylic acid metabolic process	0.00374334	YHR137W, YER061C
	GO:0043436	oxoacid metabolic process	0.00374334	YHR137W, YER061C
	GO:0006082	organic acid metabolic process	0.00376254	YHR137W, YER061C
CC	No terms were found for this aspect with a corrected P-value <= 0.05.
MF	GO:0016740	transferase activity	0.0157698	YHR137W, YER061C
Group 204 Density 0			P-value 0.0000551954354655425
members	partners
YDR210C-D	YDR130C YFR004W YKL049C YLL039C YML065W
YDR365W-B	YDR130C YGL122C YKL049C
YIL002W-A	YCL037C YDR130C YGL122C YLL039C YNL255C
YOL080C	YDL229W YDR130C YFL002C YNL255C YOR310C YPL178W
	GOID	Term	P-value	The genes annotated to this term
BP	GO:0016032	viral reproduction	0.000239589	YDR210C-D, YDR365W-B
	GO:0019058	viral infectious cycle	0.000239589	YDR210C-D, YDR365W-B
	GO:0019067	viral assembly, maturation, egress, and release	0.000239589	YDR210C-D, YDR365W-B
CC	GO:0000943	retrotransposon nucleocapsid	0.00126298	YDR210C-D, YDR365W-B
MF	GO:0004518	nuclease activity	5.51954e-05	YOL080C, YDR210C-D, YDR365W-B
	GO:0004523	ribonuclease H activity	0.000302092	YDR210C-D, YDR365W-B
	GO:0003964	RNA-directed DNA polymerase activity	0.000371752	YDR210C-D, YDR365W-B
Group 206 Density 0			P-value 1.01240502058133E-07
members	partners
YAL031C	YBL032W YBR160W YCL027W YER133W YER172C YGL122C YNL317W
YBR045C	YBR148W YDR103W YER133W YGL057C YGL122C YMR001C
YBR050C	YBR109C YDR099W YER133W YGL122C
YER158C	YAR014C YBL032W YBL085W YBR160W YER114C YER133W YFR028C YMR168C
YHR100C	YER133W YGL122C
YOR315W	YBL032W YBR160W YDL054C YER133W YKL190W YNL172W
	GOID	Term	P-value	The genes annotated to this term
BP	GO:0043666	regulation of phosphoprotein phosphatase activity	1.5433e-05	YBR045C, YAL031C
	GO:0010921	regulation of phosphatase activity	2.64345e-05	YBR045C, YAL031C
CC	GO:0000164	protein phosphatase type 1 complex	2.05688e-05	YBR045C, YBR050C
	GO:0008287	protein serine/threonine phosphatase complex	0.000153429	YBR045C, YBR050C
MF	GO:0008599	protein phosphatase type 1 regulator activity	1.01241e-07	YBR045C, YAL031C, YBR050C
	GO:0008157	protein phosphatase 1 binding	4.41497e-06	YBR045C, YAL031C
	GO:0030234	enzyme regulator activity	0.00103744	YBR045C, YAL031C, YBR050C
Group 209 Density 0			P-value 1.59324615252966E-07
members	partners
YDR466W	YBL032W YBL058W YBR084W YBR142W YCL029C YDR161W YDR188W YDR251W YDR299W YER139C YER160C YFL023W YGR017W YGR021W YGR078C YGR180C YHL024W YHR052W YHR088W YJL089W YJL095W YJR097W YJR154W YKL181W YLL008W YLR060W YLR196W YLR228C YML037C YML062C YMR048W YMR049C YMR109W YNL099C YNL232W YOL041C YOL082W YOL139C YOR141C YOR201C YPL093W YPL246C
YKL048C	YBR160W YCL024W YCR052W YDL185W YDR122W YDR507C YEL012W YEL062W YER139C YGL180W YGR021W YHR005C YHR111W YHR135C YIL033C YIL103W YJR053W YJR076C YJR097W YJR130C YKL142W YKL181W YLL008W YLR060W YLR096W YML062C YML064C YMR235C YOR233W YPL128C
YKL139W	YAL005C YBL002W YBL003C YBR009C YBR010W YBR118W YBR169C YCL011C YCL037C YCR046C YDL047W YDL084W YDL103C YDL140C YDR064W YDR138W YDR168W YDR188W YDR224C YDR225W YDR381W YDR432W YDR477W YER139C YFL010C YFL029C YGL048C YGL122C YGL123W YGL173C YGR021W YGR090W YJL006C YJL089W YJR070C YKR018C YLR060W YLR196W YLR403W YLR424W YLR432W YLR438W YML112W YMR041C YMR048W YMR242C YNL004W YNL027W YNL031C YNL102W…
YOL100W	YBL032W YBL058W YBL105C YBR160W YCR009C YCR052W YDL099W YDL222C YDR188W YDR342C YDR343C YDR382W YDR383C YDR490C YER139C YFL023W YGR021W YGR033C YGR078C YGR086C YGR167W YHL009C YHL024W YHR118C YHR205W YIL104C YIR010W YJL138C YJR006W YJR066W YJR070C YJR092W YJR097W YJR112W YKL002W YKL181W YLL008W YLR060W YLR258W YML001W YML034W YMR041C YMR048W YMR109W YNL027W YOL016C YOL041C YOL077C YOL082W YOR117W…
	GOID	Term	P-value	The genes annotated to this term
BP	GO:0006468	protein phosphorylation	2.62862e-07	YOL100W, YKL139W, YDR466W, YKL048C
	GO:0000196	MAPK cascade involved in cell wall biogenesis	4.41497e-06	YOL100W, YDR466W
	GO:0006793	phosphorus metabolic process	8.49291e-06	YOL100W, YKL139W, YDR466W, YKL048C
CC	GO:0044448	cell cortex part	0.00240446	YOL100W, YKL048C
MF	GO:0004674	protein serine/threonine kinase activity	1.59325e-07	YOL100W, YKL139W, YDR466W, YKL048C
	GO:0016773	phosphotransferase activity, alcohol group as acceptor	8.62896e-07	YOL100W, YKL139W, YDR466W, YKL048C
	GO:0005524	ATP binding	0.000110648	YOL100W, YKL139W, YDR466W, YKL048C
Group 212 Density 0			P-value 2.28218739665822E-24
members	partners
YBL111C	YBL032W YIL069C YKL049C YLL039C YNL255C
YDR089W	YKL049C YLL039C
YDR098C-B	YKL049C YKR081C
YDR210C-D	YDR130C YFR004W YKL049C YLL039C YML065W
YDR210W-B	YFR034C YHR115C YKL049C YLL039C
YDR261C-C	YFR004W YKL049C YKR081C
YDR261C-D	YKL049C
YDR316W-B	YFR004W YGL122C YKL049C
YDR365W-B	YDR130C YGL122C YKL049C
YDR545W	YDR388W YFR024C-A YGL122C YIR010W YKL049C YLL039C YMR229C YNL255C
YGR027W-B	YFR004W YGL122C YKL049C YLR055C
YGR038C-B	YKL049C YKR081C
YGR161C-D	YFR004W YKL049C
YGR296W	YBL032W YBR103W YBR160W YKL049C YNL255C
YHR214C-B	YBL032W YER151C YKL049C YNR051C
YIL177C	YBL032W YBR126C YKL049C YNL255C YPR034W
YJL225C	YBL032W YKL049C YNL255C
YJR027W	YBL032W YDR328C YKL049C YMR139W
YLR467W	YBL032W YKL049C YNL255C YPL042C
YML045W	YBL032W YER151C YKL049C YNR051C
YML133C	YBL032W YKL049C YNL255C
YMR207C	YBL026W YGL122C YKL049C YLL039C YNL255C YNR016C
YMR212C	YBR010W YBR200W YDL156W YGL122C YGR198W YIR010W YKL049C YLL039C YLR305C YLR332W YML016C YNL031C YOR181W
YNL054W-B	YER081W YFR004W YFR034C YKL049C
YNL087W	YDR363W-A YGL013C YIR010W YKL049C YKL130C YLL028W YML072C YOR086C
YNL339C	YBL032W YBR053C YBR160W YCR028C-A YKL049C YNL255C
YNR066C	YBL032W YCR061W YKL049C YML038C
YOR090C	YBL032W YER178W YGL122C YGL234W YHL011C YIL070C YIR010W YJL069C YKL049C YKR048C YLL024C YMR105C YPL240C YPR016C
YPL283C	YBL032W YGL120C YKL049C YNL255C
YPR137C-B	YGL083W YKL049C YLL039C
	GOID	Term	P-value	The genes annotated to this term
BP	GO:0016032	viral reproduction	2.28219e-24	YML045W, YDR210C-D, YDR098C-B, YJR027W, YGR038C-B, YDR365W-B, YDR261C-D, YPR137C-B, YGR027W-B, YNL054W-B, YGR161C-D, YHR214C-B, YDR210W-B, YDR316W-B
	GO:0019058	viral infectious cycle	2.28219e-24	YML045W, YDR210C-D, YDR098C-B, YJR027W, YGR038C-B, YDR365W-B, YDR261C-D, YPR137C-B, YGR027W-B, YNL054W-B, YGR161C-D, YHR214C-B, YDR210W-B, YDR316W-B
	GO:0019067	viral assembly, maturation, egress, and release	2.28219e-24	YML045W, YDR210C-D, YDR098C-B, YJR027W, YGR038C-B, YDR365W-B, YDR261C-D, YPR137C-B, YGR027W-B, YNL054W-B, YGR161C-D, YHR214C-B, YDR210W-B, YDR316W-B
CC	GO:0000943	retrotransposon nucleocapsid	1.3518e-20	YDR261C-C, YML045W, YDR210C-D, YDR098C-B, YJR027W, YGR038C-B, YDR365W-B, YDR261C-D, YPR137C-B, YGR027W-B, YNL054W-B, YGR161C-D, YHR214C-B, YDR210W-B, YDR316W-B
	GO:0044428	nuclear part	0.00016915	YDR261C-C, YML045W, YDR210C-D, YDR098C-B, YJR027W, YGR038C-B, YDR365W-B, YDR261C-D, YPR137C-B, YGR027W-B, YNL054W-B, YGR161C-D, YHR214C-B, YDR210W-B, YDR316W-B
MF	GO:0004523	ribonuclease H activity	1.53527e-23	YML045W, YDR210C-D, YDR098C-B, YJR027W, YGR038C-B, YDR365W-B, YDR261C-D, YPR137C-B, YGR027W-B, YNL054W-B, YGR161C-D, YHR214C-B, YDR210W-B, YDR316W-B
	GO:0003964	RNA-directed DNA polymerase activity	8.17663e-23	YML045W, YDR210C-D, YDR098C-B, YJR027W, YGR038C-B, YDR365W-B, YDR261C-D, YPR137C-B, YGR027W-B, YNL054W-B, YGR161C-D, YHR214C-B, YDR210W-B, YDR316W-B
	GO:0004190	aspartic-type endopeptidase activity	1.11627e-22	YML045W, YDR210C-D, YDR098C-B, YJR027W, YGR038C-B, YDR365W-B, YDR261C-D, YPR137C-B, YGR027W-B, YNL054W-B, YGR161C-D, YHR214C-B, YDR210W-B, YDR316W-B
Group 218 Density 0			P-value 0.000283355980297458
members	partners
YAL067C	YER118C YGR260W YHR042W YNL162W
YDL073W	YBR111W-A YCL010C YER018C YER118C
YDR420W	YBL032W YDR416W YER118C YHR154W YNL197C YOR153W
YGR257C	YCL037C YER118C YGL059W
YHR143W	YBL032W YER118C YNL197C
YJL062W	YER118C YKL146W YPL076W
YKL221W	YDR205W YER118C YHR026W
YNL152W	YBL007C YBL032W YDL117W YER118C YGL122C YLR191W YMR032W YPL242C
YNL331C	YER118C YNL189W
YOR311C	YER118C YLR268W YPR124W
	GOID	Term	P-value	The genes annotated to this term
BP	GO:0032506	cytokinetic process	0.000283356	YDR420W, YNL152W, YHR143W
CC	GO:0031224	intrinsic to membrane	0.00149535	YJL062W, YGR257C, YDR420W, YKL221W, YOR311C, YHR143W, YAL067C
MF	No terms were found for this aspect with a corrected P-value <= 0.05.
Group 220 Density 0			P-value 4.22535896235748E-08
members	partners
RDN25-1	YDR432W YGR103W YHR052W YMR049C YNL110C YOL041C YOR048C YPL043W
RDN25-2	YDR432W YGR103W YHR052W YMR049C YNL110C YOL041C YOR048C YPL043W
RDN58-1	YDR432W YGR103W YHR052W YMR049C YNL110C YOL041C YOR048C YPL043W
RDN58-2	YDR432W YGR103W YHR052W YMR049C YNL110C YOL041C YOR048C YPL043W
	GOID	Term	P-value	The genes annotated to this term
BP	GO:0006450	regulation of translational fidelity	4.49198e-05	RDN25-2, RDN25-1
	GO:0006448	regulation of translational elongation	8.79491e-05	RDN25-2, RDN25-1
CC	GO:0022625	cytosolic large ribosomal subunit	4.22536e-08	RDN58-2, RDN25-2, RDN58-1, RDN25-1
	GO:0043228	non-membrane-bounded organelle	0.00164663	RDN58-2, RDN25-2, RDN58-1, RDN25-1
MF	GO:0003735	structural constituent of ribosome	1.58694e-06	RDN58-2, RDN25-2, RDN58-1, RDN25-1
Group 221 Density 0			P-value 0.00585568819359417
members	partners
YDL073W	YBR111W-A YCL010C YER018C YER118C
YDL233W	YBL032W YER018C YGL122C YGL216W YJR112W YKL138C-A YOL069W
YFR008W	YBL032W YDR200C YDR532C YER018C YKL138C-A YKR025W YMR029C YMR052W YNL127W YOL135C YOR111W YOR276W YPR046W
YFR042W	YCL037C YDR320C-A YDR515W YER018C YKL138C-A YPR159W
YFR046C	YBR160W YDL028C YER018C YIR010W YMR117C YPL016W
YGR006W	YDR088C YDR318W YER013W YER172C YGL122C YLR433C YPL016W YPR046W
YJL185C	YCL056C YER018C YMR204C YOR127W YPL018W
YPL257W	YER018C YGL122C YLL036C
YPR022C	YBL032W YER018C YGL216W YKL132C
	GOID	Term	P-value	The genes annotated to this term
BP	No terms were found for this aspect with a corrected P-value <= 0.05.
CC	No terms were found for this aspect with a corrected P-value <= 0.05.
MF	GO:0003674	molecular_function	0.00585569	YPR022C, YGR006W, YJL185C, YDL073W, YFR046C, YFR042W, YPL257W, YFR008W, YDL233W
Group 224 Density 0			P-value 0.00320515559629998
members	partners
SPAC20H4.10	YEL037C YMR276W
YBL057C	YAL005C YBL016W YDR394W YEL037C YER021W YHR082C YJL164C YJL187C YKR046C YLL039C YML008C YMR276W YNL154C
YDL190C	SPBC4F6.15c YBL058W YBR082C YBR170C YBR273C YDL126C YDR049W YDR479C YEL037C YER057C YER162C YFL044C YGL003C YGR048W YJL030W YLL039C YML013W YML100W YMR276W YPL236C YPL240C
YEL025C	YAL005C YDL229W YLR452C YMR276W
YJR052W	YBL003C YBR114W YDL156W YDR510W YEL037C YER162C YGL122C YGR003W YKL112W YLL039C YLR442C YMR201C YPL046C
YJR100C	YGL122C YJL091C
YML011C	YCR009C YDR314C YDR385W YDR388W YDR515W YEL037C YER162C YFR024C-A YGL106W YGL122C YGR177C YLL039C YLR429W
	GOID	Term	P-value	The genes annotated to this term
BP	No terms were found for this aspect with a corrected P-value <= 0.05.
CC	No terms were found for this aspect with a corrected P-value <= 0.05.
MF	GO:0004842	ubiquitin-protein ligase activity	0.00320516	YDL190C, YJR052W
	GO:0019787	small conjugating protein ligase activity	0.00385766	YDL190C, YJR052W
	GO:0016881	acid-amino acid ligase activity	0.00484817	YDL190C, YJR052W
Group 227 Density 0			P-value 0.0000515633227713194
members	partners
YDR194C	YBL003C YBL045C YBR010W YDL213C YDR365C YER081W YFL002C YFL036W YGL035C YGL122C YHR052W YIR010W YLR233C YML065W YNL031C YNL175C YNL230C YNL255C YNR051C YPL055C
YKR024C	YAL035W YBL003C YBR010W YDL014W YDL213C YDL229W YDR060W YDR381W YER013W YFR001W YGL078C YHR082C YJL095W YJR041C YKL014C YKL021C YKR081C YLR233C YMR229C YNL031C YNL061W YNL175C YOR204W YOR206W YOR294W YPL093W YPR131C
YOR017W	YBL009W YBL026W YBR010W YCL027W YDL030W YDL213C YDR510W YFL002C YFL036W YGL105W YIR009W YJL095W YLL019C YNL031C YNL230C YPL055C
	GOID	Term	P-value	The genes annotated to this term
BP	GO:0006396	RNA processing	0.000843491	YKR024C, YDR194C, YOR017W
CC	No terms were found for this aspect with a corrected P-value <= 0.05.
MF	GO:0004004	ATP-dependent RNA helicase activity	5.15633e-05	YKR024C, YDR194C
	GO:0008186	RNA-dependent ATPase activity	7.75166e-05	YKR024C, YDR194C
	GO:0003724	RNA helicase activity	9.77356e-05	YKR024C, YDR194C
Group 228 Density 0			P-value 0.00191815586058304
members	partners
YIL048W	YBL026W YBL102W YBR106W YDR141C YDR264C YER146W YHR195W YJL124C YJL196C YLL039C YLR241W YNL297C
YNR041C	YBL007C YKL117W YLR222C YML123C YNL255C
YNR060W	YDR384C YGL122C YLR241W
YOR307C	YDR331W YHR082C YLR241W YML123C YMR058W YNL197C
	GOID	Term	P-value	The genes annotated to this term
BP	GO:0006812	cation transport	0.00274506	YNR060W, YIL048W
CC	GO:0016021	integral to membrane	0.00191816	YNR060W, YNR041C, YIL048W, YOR307C
	GO:0031224	intrinsic to membrane	0.0022672	YNR060W, YNR041C, YIL048W, YOR307C
MF	No terms were found for this aspect with a corrected P-value <= 0.05.
Group 231 Density 0			P-value 0.0000114753201546676
members	partners
YLR131C	YBR160W YDL155W YDR087C YDR192C YDR295C YFL034C-B YFR028C YFR053C YGR218W YHR082C YMR304W YMR308C YNL135C YNL157W YNL161W YNL197C YNL254C YNL307C YOR185C YPL256C YPR086W YPR119W
YNL068C	YBL002W YBL032W YBR060C YBR160W YCL037C YGL150C YHR099W YIR010W YLL004W YML065W YMR001C YMR043W YMR303C YNL197C YNL254C YOL004W YOR361C YOR372C YPR120C
YPR093C	YBR017C YBR109C YBR154C YCR012W YDL140C YDL229W YDR059C YDR131C YDR177W YDR388W YDR395W YER110C YGL070C YGL241W YHR143W-A YHR174W YIL021W YIL062C YJL140W YJR132W YKL007W YKL060C YLR347C YLR368W YLR429W YMR186W YMR308C YNL135C YOL005C YOR151C YOR210W YOR224C YPL106C YPR187W
	GOID	Term	P-value	The genes annotated to this term
BP	GO:0000114	regulation of transcription involved in G1 phase of mitotic cell cycle	1.14753e-05	YNL068C, YLR131C
	GO:0051329	interphase of mitotic cell cycle	0.000888958	YNL068C, YLR131C
CC	No terms were found for this aspect with a corrected P-value <= 0.05.
MF	GO:0000981	sequence-specific DNA binding RNA polymerase II transcription factor activity	0.00145294	YNL068C, YLR131C
	GO:0001071	nucleic acid binding transcription factor activity	0.00278563	YNL068C, YLR131C
	GO:0003700	sequence-specific DNA binding transcription factor activity	0.00278563	YNL068C, YLR131C
Group 232 Density 0			P-value 0.000184075919344128
members	partners
YGR096W	YNL197C YOL090W
YLL016W	YLR310C YNL098C YOL090W
YNL082W	YDR510W YGL111W YLL024C YMR167W YOL090W
YOR033C	YDR099W YER177W YMR167W YOL090W YPL240C
YPR179C	YCL021W-A YDR295C YGL122C YHR158C YNL021W YOL090W
	GOID	Term	P-value	The genes annotated to this term
BP	GO:0006298	mismatch repair	0.000184076	YOR033C, YNL082W
CC	No terms were found for this aspect with a corrected P-value <= 0.05.
MF	GO:0003677	DNA binding	0.00681592	YOR033C, YNL082W, YPR179C
Group 233 Density 0			P-value 8.06738924850045E-06
members	partners
YCR073C	YAR019C YBL032W YBL041W YBR247C YCL037C YCL043C YDL056W YDL125C YDR007W YDR023W YDR170C YDR179C YDR524C YGL122C YGL134W YGR142W YHL020C YHR027C YHR157W YIL051C YJL089W YJL108C YJL128C YLR006C YML096W YMR117C YMR165C YNL250W YNL284C-A YNR031C YOR018W YPL217C
YCR091W	YAL028W YAR019C YBL032W YBR285W YDL002C YDL006W YDL039C YDL153C YDL192W YDR007W YDR173C YGL122C YGL245W YGR223C YGR276C YHR056C YHR082C YIL135C YJL089W YJL198W YLL034C YML037C YML083C YML096W YMR165C YMR184W YMR205C YMR216C YNL045W YNL155W YNR047W YOL104C YPR063C YPR119W YPR160W
YJL165C	YAR007C YBR108W YCR016W YCR099C YDL039C YDL056W YDL074C YDL212W YDR007W YDR020C YDR022C YDR135C YDR168W YDR293C YER021W YFR004W YGL105W YGL122C YGL134W YGR130C YHR056C YHR201C YIL051C YIR010W YKL038W YLL039C YML037C YMR076C YMR153W YMR165C YNL116W YOL103W YOL122C YOR210W YOR292C YPR013C YPR058W YPR119W YPR160W
	GOID	Term	P-value	The genes annotated to this term
BP	GO:0006468	protein phosphorylation	1.17277e-05	YJL165C, YCR091W, YCR073C
	GO:0006793	phosphorus metabolic process	0.000157973	YJL165C, YCR091W, YCR073C
	GO:0006464	cellular protein modification process	0.000851912	YJL165C, YCR091W, YCR073C
CC	GO:0005575	cellular_component	0.00172232	YJL165C, YCR091W, YCR073C
MF	GO:0004674	protein serine/threonine kinase activity	8.06739e-06	YJL165C, YCR091W, YCR073C
	GO:0016773	phosphotransferase activity, alcohol group as acceptor	2.85248e-05	YJL165C, YCR091W, YCR073C
	GO:0016772	transferase activity, transferring phosphorus-containing groups	0.000191721	YJL165C, YCR091W, YCR073C
Group 235 Density 0			P-value 0.0012098179823717
members	partners
YCL017C	YAL024C YDL120W YER048W-A YFR034C YGR275W YHR111W YJL141C YKR016W YKR064W YOR251C YPL026C YPL135W
YDR223W	YBL032W YBR160W YGL122C YJL141C YPR104C
YEL046C	YAL024C YBL032W YBR009C YFR004W YFR034C YGR092W YHR027C YHR200W YJL074C YJL141C YLL039C YNL251C YOR117W YPL249C
YER170W	YGL061C YGL122C YJL141C
YJL206C	YJL030W YJL141C
YML078W	YGL122C YJL141C YKR016W YLL039C YML064C YPR184W
YOL143C	YAL024C YBR261C YER151C YGL122C YGR092W YIL070C YJL141C YKR104W YLL062C YLR291C YNL255C
YPL247C	YJL141C YLR259C YMR108W YPL203W
	GOID	Term	P-value	The genes annotated to this term
BP	No terms were found for this aspect with a corrected P-value <= 0.05.
CC	No terms were found for this aspect with a corrected P-value <= 0.05.
MF	GO:0030170	pyridoxal phosphate binding	0.00120982	YEL046C, YCL017C
	GO:0070279	vitamin B6 binding	0.00120982	YEL046C, YCL017C
	GO:0016853	isomerase activity	0.00354892	YOL143C, YML078W
Group 236 Density 0			P-value 0.000248232624354725
members	partners
YJL059W	YBR106W YFL062W YGL122C YLR022C
YLR237W	YBL032W YDR032C YFL062W YGR295C YLL039C YML132W
YMR221C	YDR378C YFL062W YGL006W YGR295C YHL048W YJL178C YLL039C YPR036W
YOR079C	YFL062W YGR295C YPR198W
YPR192W	YBR106W YCR034W YDR331W YDR439W YFL062W YGR060W YGR295C YHL048W YHR140W YKL065C YNL101W YPL189W YPR156C
	GOID	Term	P-value	The genes annotated to this term
BP	GO:0006810	transport	0.000248233	YOR079C, YLR237W, YJL059W, YPR192W, YMR221C
	GO:0051234	establishment of localization	0.000286172	YOR079C, YLR237W, YJL059W, YPR192W, YMR221C
	GO:0055085	transmembrane transport	0.00128942	YOR079C, YLR237W, YPR192W
CC	GO:0016021	integral to membrane	0.000400831	YOR079C, YLR237W, YJL059W, YPR192W, YMR221C
	GO:0031224	intrinsic to membrane	0.000494028	YOR079C, YLR237W, YJL059W, YPR192W, YMR221C
MF	GO:0022891	substrate-specific transmembrane transporter activity	0.00102499	YOR079C, YLR237W, YPR192W
Group 238 Density 0			P-value 0.0000022084081050556
members	partners
YDL093W	YAL023C YBR044C YBR106W YDR139C YOR321W
YLR306W	YDR139C YDR394W YDR460W YKL210W YLR128W YOL133W YPL003W YPR051W
YPR066W	YDR139C YGL122C YLL036C YPL003W
	GOID	Term	P-value	The genes annotated to this term
BP	GO:0045116	protein neddylation	2.20841e-06	YPR066W, YLR306W
	GO:0032446	protein modification by small protein conjugation	0.000750758	YPR066W, YLR306W
	GO:0006464	cellular protein modification process	0.000851912	YPR066W, YLR306W, YDL093W
CC	No terms were found for this aspect with a corrected P-value <= 0.05.
MF	GO:0016874	ligase activity	0.00275764	YPR066W, YLR306W
Group 244 Density 0			P-value 5.12002136214804E-06
members	partners
YKR077W	YBL032W YBR160W YER111C YLL004W YLR182W YNL197C
YOR066W	YBL032W YBR160W YDL056W YER111C YLR182W
YOR083W	YBR160W YDL179W YDR335W YER111C YGL059W YGL180W YHR135C YJL164C YJR059W YLR182W YNL330C YOR244W YPL031C YPL116W YPL153C YPL240C YPR068C
	GOID	Term	P-value	The genes annotated to this term
BP	GO:0051329	interphase of mitotic cell cycle	5.12002e-06	YOR066W, YOR083W, YKR077W
	GO:0000114	regulation of transcription involved in G1 phase of mitotic cell cycle	1.14753e-05	YOR066W, YKR077W
	GO:0000082	G1/S transition of mitotic cell cycle	0.000138724	YOR066W, YOR083W
CC	No terms were found for this aspect with a corrected P-value <= 0.05.
MF	No terms were found for this aspect with a corrected P-value <= 0.05.
Group 245 Density 0			P-value 0.000397690060219855
members	partners
YDR035W	YFR004W YGL122C YJL164C YLL039C YLR355C YOR230W
YDR151C	YBL032W YDL160C YDR178W YGL122C YGR180C YJL026W YLR096W YOR230W YPL059W
YLR136C	YDL160C YDR178W YGR180C YJL026W YNL230C YOR230W
YLR437C	YBL032W YDL101C YFR014C YGR180C YJL026W YJR059W
YOR229W	YAR014C YCL037C YCL059C YDR188W YDR190C YGL016W YGR180C YIL035C YJL026W YJL189W YJR059W YML064C YMR308C YNL189W YOR230W YOR283W YPL240C
	GOID	Term	P-value	The genes annotated to this term
BP	GO:0006879	cellular iron ion homeostasis	0.00039769	YDR151C, YLR136C
	GO:0055065	metal ion homeostasis	0.00088196	YDR151C, YLR136C
CC	No terms were found for this aspect with a corrected P-value <= 0.05.
MF	GO:0003729	mRNA binding	0.0011278	YDR151C, YLR136C
Group 248 Density 0			P-value 0.00444606548077265
members	partners
YDR277C	YAR014C YBL007C YBL085W YBR200W YCR088W YDL138W YDL194W YDR162C YDR456W YGL122C YHL002W YHR114W YJL020C YJR022W YJR090C YKL038W YKL129C YLR191W YLR447C YMR109W YNL073W YPL240C
YER047C	YDL008W YDL166C YDR510W YER095W YER161C YGR086C YGR140W YJL019W YJL092W YKL032C YKL129C YLR191W YMR032W YMR109W YMR117C YOL034W YOR144C YOR181W YPL126W
YGL242C	YBR109C YGL122C YKL035W YKL129C YKR099W YMR109W
YIL156W	YBL007C YBL032W YDR247W YDR388W YDR477W YER118C YFR024C-A YGL179C YGL180W YHL002W YHL007C YHR016C YHR114W YHR124W YHR135C YJL020C YJL164C YJR059W YKL129C YLL039C YLR014C YLR191W YMR032W YMR109W YMR216C YNL154C YOR181W YPL031C YPL209C YPR154W
YIL159W	YBL002W YBR009C YBR010W YCL027W YDR224C YER177W YFL039C YFR028C YGL122C YJL020C YKL079W YKL129C YKR055W YLL017W YLR191W YLR197W YLR310C YLR319C YLR452C YMR032W YMR109W YNL030W YNL031C YNL271C YOR122C YPL240C
YKR069W	YHR152W YKL129C YMR109W
YOR035C	YAL029C YBR109C YGL106W YGL122C YHR023W YHR082C YJR066W YKL129C YKL203C YLL039C YMR109W YOR326W YPL240C
YOR247W	YBL032W YFR024C-A YHR016C YKL129C YKL130C YLR223C YMR109W
	GOID	Term	P-value	The genes annotated to this term
BP	No terms were found for this aspect with a corrected P-value <= 0.05.
CC	No terms were found for this aspect with a corrected P-value <= 0.05.
MF	GO:0008092	cytoskeletal protein binding	0.00444607	YOR035C, YIL159W
Group 251 Density 0			P-value 0.000302091692018173
members	partners
YCL025C	YAL007C YAL018C YAR031W YBR106W YBR159W YCL027W YCR034W YDL212W YDL232W YDR276C YER026C YFL041W YGR060W YGR284C YHL003C YHR026W YHR133C YIL016W YJL117W YJR095W YJR117W YKL008C YKL065C YLL039C YLR343W YLR372W YML038C YML048W YMR215W YOR016C YPL076W YPL227C YPL234C YPL265W YPR020W YPR198W
YJR015W	YAR031W YBR106W YBR159W YDL212W YDL232W YHR050W YHR142W YHR188C YJL002C YLL039C YLR372W YMR149W YOR016C YOR036W
YLL028W	YAL018C YAR031W YAR033W YBL029C-A YBR052C YBR106W YBR110W YBR159W YBR296C YCR034W YDL212W YDL222C YDL232W YDR011W YDR034W-B YDR297W YDR497C YDR501W YEL002C YEL027W YFL041W YFR014C YGL051W YGL059W YGL077C YGL166W YGR055W YGR060W YGR138C YGR174C YHR026W YHR094C YHR096C YHR140W YHR188C YIL016W YIL121W YJL164C YJL187C YKL010C YKL051W YKL065C YLL039C YLR018C YLR056W YLR219W YLR221C YLR326W YLR332W YLR…
YLR034C	YAL018C YBR106W YBR235W YEL027W YFL062W YGL122C YHR026W YKL065C YLL039C YLR056W YMR215W YNL197C YPL076W YPL217C
	GOID	Term	P-value	The genes annotated to this term
BP	GO:0015837	amine transport	0.000532454	YCL025C, YLL028W
	GO:0071705	nitrogen compound transport	0.000962014	YCL025C, YLL028W
	GO:0071702	organic substance transport	0.00403732	YCL025C, YLL028W
CC	No terms were found for this aspect with a corrected P-value <= 0.05.
MF	GO:0005275	amine transmembrane transporter activity	0.000302092	YCL025C, YLL028W
	GO:0022891	substrate-specific transmembrane transporter activity	0.000425153	YCL025C, YLL028W, YLR034C
	GO:0022804	active transmembrane transporter activity	0.00427594	YCL025C, YLL028W
Group 264 Density 0			P-value 0.0000596305504429044
members	partners
YDR124W	YBR251W YDR063W YDR175C YDR347W YGL122C YGR165W YHR155W YIL043C YIL093C YMR188C YOR158W YPL118W YPR049C
YIL146C	YBL078C YGL167C YPR049C
YPL166W	YDL214C YDL229W YDR022C YGL122C YGL180W YGL237C YKL166C YLR423C YOL016C YPR049C
	GOID	Term	P-value	The genes annotated to this term
BP	GO:0000422	mitochondrion degradation	5.96306e-05	YPL166W, YIL146C
	GO:0006914	autophagy	0.00067897	YPL166W, YIL146C
CC	No terms were found for this aspect with a corrected P-value <= 0.05.
MF	GO:0003674	molecular_function	0.0313806	YPL166W, YDR124W, YIL146C
Group 265 Density 0			P-value 0.000743364978507482
members	partners
YDL245C	YBL032W YHR096C YJR160C YNL121C
YDR219C	YDR328C YHR117W YHR122W YNL121C
YIL155C	YKR016W YLL039C YNL121C
YJL093C	YAR027W YGL122C YLR113W YNL121C
YPR128C	YAR027W YAR028W YGL114W YMR306W YNL048W YNL121C YOL147C YPL141C YPL240C
	GOID	Term	P-value	The genes annotated to this term
BP	GO:0015672	monovalent inorganic cation transport	0.000743365	YPR128C, YJL093C
	GO:0055085	transmembrane transport	0.00128942	YPR128C, YDL245C, YJL093C
CC	GO:0044425	membrane part	0.00108433	YPR128C, YDL245C, YIL155C, YDR219C, YJL093C
MF	GO:0022891	substrate-specific transmembrane transporter activity	0.00102499	YPR128C, YDL245C, YJL093C
	GO:0022892	substrate-specific transporter activity	0.0018406	YPR128C, YDL245C, YJL093C
Group 266 Density 0			P-value 1.47242595267478E-06
members	partners
YGR070W	YCL027W YFR028C YGL122C YHR030C YLL039C
YIL113W	YDL159W YER155C YHR030C YKL161C YLL019C YNL138W
YNL053W	YBL016W YBL032W YBR109C YDR229W YDR356W YGR040W YHR030C YJL128C YKL042W YKL161C YLR354C YNL197C YOR257W
YPL089C	YBL032W YBR182C YDL122W YER049W YGR229C YHR030C YKL161C YLR347C YNL118C YNL189W YNL197C
YPR047W	YGL122C YHR030C YHR158C YLL039C YNL024C YOR252W
	GOID	Term	P-value	The genes annotated to this term
BP	GO:0000200	inactivation of MAPK activity involved in cell wall biogenesis	1.47243e-06	YNL053W, YIL113W
	GO:0010969	regulation of pheromone-dependent signal transduction involved in conjugation with cellular fusion	4.90501e-06	YNL053W, YIL113W
	GO:0060238	regulation of signal transduction involved in conjugation with cellular fusion	4.90501e-06	YNL053W, YIL113W
CC	No terms were found for this aspect with a corrected P-value <= 0.05.
MF	GO:0017017	MAP kinase tyrosine/serine/threonine phosphatase activity	1.47243e-06	YNL053W, YIL113W
	GO:0008138	protein tyrosine/serine/threonine phosphatase activity	7.35521e-06	YNL053W, YIL113W
	GO:0042578	phosphoric ester hydrolase activity	0.00360294	YNL053W, YIL113W
Group 271 Density 0			P-value 0.000203304008262134
members	partners
YAL063C-A	YPR154W
YBR108W	YBL007C YBL032W YBL085W YCR009C YDR388W YFR024C-A YGL180W YGR086C YGR092W YGR136W YHL002W YHL007C YHR016C YHR079C YHR082C YHR114W YHR135C YIL095W YJL020C YJL095W YJL106W YJL164C YJL165C YJR059W YLR248W YLR438C-A YMR032W YNL154C YNL307C YOR181W YPL004C YPL141C YPL153C YPR154W
YDL159W-A	YPR154W
YLR144C	YBL032W YBR041W YBR177C YCR009C YDL052C YDR388W YER032W YFR024C-A YGL106W YGL122C YGR086C YGR136W YHL002W YHR007C YHR016C YHR072W YJL052W YJL151C YJR009C YKL140W YKR089C YLR100W YLR175W YLR429W YML013W YPR154W
YMR162C	YDR388W YFR024C-A YHR114W YJL020C YLL039C YMR032W YNR048W YPR154W
YNL094W	YAL049C YBL007C YBL106C YBR133C YBR260C YCR009C YCR088W YDR155C YDR162C YDR388W YFR024C-A YGL179C YGL180W YGR136W YGR196C YHL002W YHR016C YHR114W YHR135C YHR179W YIL036W YJL020C YJL187C YKL085W YLL050C YLR191W YLR429W YMR032W YMR105C YNL025C YNL243W YOR043W YOR181W YOR244W YPL004C YPR154W
YPL038W	YBL085W YBR200W YCL027W YDL117W YDR162C YEL009C YER114C YFR024C-A YGL122C YGR136W YHL002W YHR016C YIL046W YKL129C YLR310C YMR109W YNL103W YPR154W
YPR081C	YBL002W YBR010W YDR224C YDR388W YFR024C-A YGR136W YHR016C YNL031C YPR034W YPR154W
	GOID	Term	P-value	The genes annotated to this term
BP	GO:0030036	actin cytoskeleton organization	0.000203304	YNL094W, YBR108W, YLR144C
	GO:0030029	actin filament-based process	0.000241281	YNL094W, YBR108W, YLR144C
	GO:0007010	cytoskeleton organization	0.00159966	YNL094W, YBR108W, YLR144C
CC	No terms were found for this aspect with a corrected P-value <= 0.05.
MF	No terms were found for this aspect with a corrected P-value <= 0.05.
Group 274 Density 0			P-value 6.75390866516904E-07
members	partners
YOR242C	YBL084C YKR031C
YOR255W	YGL122C YKR031C
YPL027W	YBL007C YKR031C
	GOID	Term	P-value	The genes annotated to this term
BP	GO:0010927	cellular component assembly involved in morphogenesis	6.75391e-07	YOR242C, YOR255W, YPL027W
	GO:0030437	ascospore formation	4.08214e-06	YOR242C, YOR255W, YPL027W
	GO:0048468	cell development	4.08214e-06	YOR242C, YOR255W, YPL027W
CC	GO:0031160	spore wall	1.76488e-05	YOR242C, YOR255W
	GO:0005628	prospore membrane	6.38832e-05	YOR255W, YPL027W
	GO:0042763	intracellular immature spore	6.38832e-05	YOR255W, YPL027W
MF	GO:0003674	molecular_function	0.0313806	YOR242C, YOR255W, YPL027W
Group 278 Density 0			P-value 0.00105602186200603
members	partners
YJL073W	YBL032W YJL019W YJL034W YML065W
YOL031C	YAL005C YJL034W YJR022W YNL238W
YOL081W	YAL056W YBR140C YFL033C YGL087C YGL122C YJL034W YJL110C YLL039C YLR178C YMR139W YNL098C YOR371C YPL106C YPL204W
	GOID	Term	P-value	The genes annotated to this term
BP	No terms were found for this aspect with a corrected P-value <= 0.05.
CC	No terms were found for this aspect with a corrected P-value <= 0.05.
MF	GO:0060589	nucleoside-triphosphatase regulator activity	0.00105602	YOL031C, YOL081W
	GO:0030234	enzyme regulator activity	0.0043254	YOL031C, YOL081W
Group 279 Density 0			P-value 3.68363731701379E-07
members	partners
YCR037C	YBR106W YHL042W YHR136C YJL002C YLL039C
YCR101C	YGL122C YGR216C YHL042W YIL061C
YEL004W	YDR414C YNL197C YPL264C
YFL040W	YDR414C YHL042W YLR214W YMR266W YPR121W
YGL259W	YDR414C YHL042W
YGR199W	YDR414C YHL042W YPL026C
YHR032W	YDL012C YHL042W YLL039C
YIL006W	YBL032W YHL042W YNL197C
YJL133W	YDR414C YGL104C
YPL175W	YGL104C YPL096C-A
YPL270W	YGL104C YGL122C YOR327C
	GOID	Term	P-value	The genes annotated to this term
BP	GO:0055085	transmembrane transport	7.00613e-06	YPL270W, YIL006W, YEL004W, YFL040W, YCR037C, YHR032W
	GO:0015711	organic anion transport	0.000120602	YIL006W, YCR037C
	GO:0006839	mitochondrial transport	0.000221749	YPL270W, YIL006W, YJL133W
CC	GO:0016021	integral to membrane	1.41167e-06	YIL006W, YCR037C, YJL133W, YPL270W, YEL004W, YFL040W, YCR101C, YHR032W, YPL175W, YGR199W
	GO:0031224	intrinsic to membrane	2.12457e-06	YIL006W, YCR037C, YJL133W, YPL270W, YEL004W, YFL040W, YCR101C, YHR032W, YPL175W, YGR199W
MF	GO:0022857	transmembrane transporter activity	3.68364e-07	YPL270W, YIL006W, YEL004W, YFL040W, YCR037C, YJL133W, YHR032W
	GO:0015291	secondary active transmembrane transporter activity	9.51402e-05	YIL006W, YCR037C, YHR032W
Group 288 Density 0			P-value 0.00781390545400428
members	partners
YJR106W	YBL032W YCL052C YMR228W YOR153W
YOR348C	YCR045C YJL084C YLL039C YMR228W YPL240C
YPR186C	YLL039C YMR228W
	GOID	Term	P-value	The genes annotated to this term
BP	GO:0055085	transmembrane transport	0.00781391	YOR348C, YJR106W
CC	No terms were found for this aspect with a corrected P-value <= 0.05.
MF	No terms were found for this aspect with a corrected P-value <= 0.05.
Group 293 Density 0			P-value 0.000013233838423441
members	partners
YLL027W	YBL032W YDL213C YDR381W YDR388W YDR477W YER131W YGL122C YGL189C YJL080C YJR122W YKL040C YNL255C YPL216W
YNL295W	YBR009C YBR010W YDR247W YHR008C YJR122W YNL030W YNL031C
YNR075C-A	YJR122W
YPR067W	YBR181C YDL075W YDL182W YGL122C YGL203C YHR079C YJL106W YJR122W YML093W YMR001C YNL096C YNL298W YOL127W YPR110C
	GOID	Term	P-value	The genes annotated to this term
BP	GO:0006768	biotin metabolic process	1.32338e-05	YPR067W, YLL027W
	GO:0009102	biotin biosynthetic process	1.32338e-05	YPR067W, YLL027W
	GO:0043604	amide biosynthetic process	1.32338e-05	YPR067W, YLL027W
CC	No terms were found for this aspect with a corrected P-value <= 0.05.
MF	GO:0005506	iron ion binding	0.000498039	YPR067W, YLL027W
Group 295 Density 0			P-value 2.53296965577905E-06
members	partners
YBL085W	YAL041W YBL016W YBL032W YBR003W YBR010W YBR102C YBR108W YBR200W YBR238C YCL024W YCL031C YDL155W YDR036C YDR085C YDR162C YDR239C YDR277C YDR329C YDR372C YDR480W YER008C YER032W YER081W YER124C YER155C YER158C YER164W YER165W YFR028C YFR034C YGL035C YGL122C YGL190C YGL201C YGR052W YHL007C YIL144W YJL155C YJL164C YJR056C YJR061W YJR138W YKL218C YLL039C YLL040C YLR096W YLR229C YLR314C YML109W YMR032W…
YDL117W	YDR211W YER081W YER118C YER177W YGR037C YJL155C YJR059W YJR138W YKR009C YMR032W YMR138W YNL078W YNL152W YNL197C YNR016C YOL070C YPL038W YPL158C
YER114C	YAL041W YBL016W YBR009C YBR010W YBR200W YDL156W YDR085C YDR162C YDR259C YDR480W YER032W YER118C YER124C YER158C YER177W YGL190C YHL007C YIL144W YJR138W YLL039C YLR229C YML109W YMR080C YMR124W YMR244W YNL030W YNL031C YNL078W YNL298W YOR188W YOR370C YPL038W YPL049C YPL158C
	GOID	Term	P-value	The genes annotated to this term
BP	GO:0032506	cytokinetic process	2.53297e-06	YER114C, YBL085W, YDL117W
	GO:0007109	cytokinesis, completion of separation	8.09326e-06	YER114C, YBL085W
	GO:0007266	Rho protein signal transduction	1.76488e-05	YER114C, YBL085W
CC	GO:0005935	cellular bud neck	1.24708e-05	YER114C, YBL085W, YDL117W
	GO:0030427	site of polarized growth	4.86619e-05	YER114C, YBL085W, YDL117W
MF	GO:0005543	phospholipid binding	0.000780472	YER114C, YBL085W
	GO:0008289	lipid binding	0.00102147	YER114C, YBL085W
Group 297 Density 0			P-value 0.0000756675211813563
members	partners
YBR101C	YAL005C YBR115C YDL229W YDR171W YDR325W YGL099W YGL122C YKR059W YLL039C YNL209W YPR154W
YDR338C	YAL005C YLL039C
YEL025C	YAL005C YDL229W YLR452C YMR276W
YEL071W	YAL005C YDL229W YER151C YFR004W YHR027C YKL103C YLL039C YNL251C YOR117W YPL004C YPL063W YPL190C YPR165W
YER103W	YAL005C YBL075C YBL087C YDL229W YDR328C YDR335W YDR381W YER012W YER110C YFR004W YGL122C YGL130W YGL206C YGR128C YGR192C YIL094C YJL061W YJR132W YKR016W YLL024C YLL039C YLR293C YNL124W YNL157W YOR027W YOR039W YOR304W YPL106C YPR119W
YER132C	YAL005C YDL229W YDR103W YER177W YGR052W YGR135W YJR005W YLL039C YLR310C YMR139W YNL025C YNL307C YOL108C YPL203W YPL204W
YFL052W	YDL229W
YGR173W	YAL005C YAL036C YAR019C YBR010W YBR118W YDR152W YFR004W YGL083W YGL122C YGL195W YKL085W YLL024C YNL031C YOL061W YPL235W YPR080W
YGR198W	YAL005C YBL093C YDL213C YDL229W YDR212W YDR449C YEL051W YGL122C YKL049C YLL039C YLR222C YLR305C YLR380W YMR212C YOR181W
YGR264C	YAL005C YDL229W YDR386W YDR510W YER123W YFR004W YFR014C YGL105W YGL112C YGL245W YGR092W YKL012W YLL022C YLL039C YLR258W YNL189W YOR117W
YHR080C	YDL229W YPL240C
YHR150W	YBR168W YDL229W
YIR039C	YDL229W YOL113W
YKL073W	YAL005C YCR008W YDL200C YDL229W YDR394W YGL122C YHR030C YJL034W YJL159W YKL049C YNL154C YOL087C YOR360C YPL020C
YKR056W	YDL229W YKR072C
YLR187W	YAL005C YAL032C YBL032W YBR160W YDL229W YDR258C YGL017W YHR030C YLL024C YLR085C YLR432W YNL197C
YLR189C	YAL005C YBL038W YBR009C YBR010W YDL156W YDL229W YGL122C YGR220C YJL179W YLL024C YNL030W YNL031C
YLR209C	YAL005C YDL229W YGL122C YLL024C YNL189W
YLR398C	YAL005C YBR142W YCR035C YDL014W YDL229W YDR012W YDR153C YDR280W YDR381W YEL026W YGL173C YGL213C YGR158C YKL023W YLL024C YLL039C YLR150W YLR175W YML056C YMR290C YNL255C YOR076C YPR189W
YML004C	YDL229W YGL122C YPL031C
YMR027W	YDL229W YFR004W YGL122C YHR039C-A YLL024C YLL039C YPR036W
YMR066W	YAL005C YBL026W YDL229W YLR191W YPL106C
YMR099C	YAL005C YDL229W YFR004W YGL122C YHR027C YIL078W YJL164C YJL208C YJR059W YKR079C YLL039C YPL231W
YMR259C	YAL005C YBR061C YBR136W YDL229W YFR024C-A YGR108W YJR009C YLL039C YLR409C YOR042W
YOL023W	YBL016W YDL229W
YOL033W	YAL005C YAR014C YDR381W YER125W YGR040W YKL117W YLL024C
YOL057W	YCR032W YDL229W
YOL097C	YAL005C YBR114W YDL229W YFR004W YGL253W YHR027C YHR200W YNL162W
YOL151W	YDL229W YGL122C YNL118C
YOR086C	YAL005C YBL056W YBR010W YBR217W YDL229W YGL122C YJR010C-A YKL049C YLL039C YLR249W YML072C YNL031C YNL087W YNL255C
YOR091W	YAL005C YAL036C YER036C YER151C YHR064C YLL024C YLL039C YLR249W YMR047C YNL255C YNR051C YPR161C YPR175W
YOR227W	YAL005C YBL032W YBR194W YDL229W YER133W YGL122C YHL002W YKR081C YMR109W YNL061W YPL240C YPR152C
YPL002C	YAL005C YBL032W YBR025C YCR065W YDL229W YER021W YJR102C YKL041W YLR025W YLR119W YLR417W YMR077C YPL065W
YPL104W	YAL005C YDL229W YHR082C YJL164C YLL024C YOR386W
YPL165C	YAL005C YNL197C
YPL167C	YAL005C YDL229W YGR274C YIL139C YLL024C YOR346W
YPR026W	YDL229W YLL039C YPL031C
YPR140W	Q0050 YAL005C YAL024C YCL037C YDL229W YGL122C YGL173C YLL024C YPL106C YPR024W
YPR163C	YAL005C YDL229W YDR130C YDR429C YFR004W YHR027C YHR200W YIL144W YIR010W YML010W YNL209W YNL255C YOR117W YPR144C
	GOID	Term	P-value	The genes annotated to this term
BP	GO:0006418	tRNA aminoacylation for protein translation	8.39459e-05	YOL097C, YPL104W, YGR264C, YOL033W
	GO:0043038	amino acid activation	0.000112742	YOL097C, YPL104W, YGR264C, YOL033W
CC	No terms were found for this aspect with a corrected P-value <= 0.05.
MF	GO:0004812	aminoacyl-tRNA ligase activity	7.56675e-05	YOL097C, YPL104W, YGR264C, YOL033W
	GO:0016875	ligase activity, forming carbon-oxygen bonds	7.56675e-05	YOL097C, YPL104W, YGR264C, YOL033W
	GO:0000774	adenyl-nucleotide exchange factor activity	0.00053732	YKL073W, YBR101C
Group 302 Density 0			P-value 0.00198643309456737
members	partners
YCR024C-A	YBR159W YBR290W YDL212W YDR331W YDR414C YDR515W YEL063C YGR284C YJL004C YJL124C YLL023C YLR241W YLR372W YOL132W YPL227C
YER060W-A	YBL032W YBR106W YOL132W
YIL120W	YAL058W YBR106W YBR159W YER113C YGL051W YLL023C YPL240C
YLL056C	YDR414C YLL023C
YMR274C	YBL032W YBR106W YNL197C YOL132W
YNR026C	YCL001W YDR414C YLL023C YPL218W
	GOID	Term	P-value	The genes annotated to this term
BP	No terms were found for this aspect with a corrected P-value <= 0.05.
CC	GO:0016021	integral to membrane	0.00198643	YMR274C, YCR024C-A, YNR026C, YIL120W, YER060W-A
MF	No terms were found for this aspect with a corrected P-value <= 0.05.
Group 307 Density 0			P-value 0.000106489011718201
members	partners
YBR298C-A	YKL166C YNL298W
YDL167C	YBL081W YBR212W YLL039C YNL016W YPR080W
YEL065W	YBR160W YDR077W YGL071W YKL166C YLL039C YNL197C
YER168C	YDR311W YGR128C YHR174W YKL166C YLR085C
YHR168W	YKL166C YPL031C YPL106C
YIL172C	YDL012C YKL166C YLL039C YLR096W YPL031C
YLR443W	YBR109C YCL037C YGL122C YKL166C
YOL076W	YDL014W YLL039C YML094W YNL178W YOR063W YPR131C
YOR068C	YKL166C
YOR163W	YCL037C YDR515W YGL122C YKL166C YLL039C YNL172W
YOR334W	YIL169C YKL166C YPL060W YPR151C
YPL184C	YBL032W YBR212W YNR051C
YPR051W	YCL037C YCR020C-A YEL053C YLR306W YNL178W YNL255C YOR063W
	GOID	Term	P-value	The genes annotated to this term
BP	GO:0006474	N-terminal protein amino acid acetylation	0.000136757	YOL076W, YPR051W
	GO:0030001	metal ion transport	0.000495341	YEL065W, YOR334W, YLR443W
CC	GO:0031248	protein acetyltransferase complex	0.000106489	YOL076W, YPR051W
	GO:0031414	N-terminal protein acetyltransferase complex	0.000106489	YOL076W, YPR051W
MF	GO:0004596	peptide alpha-N-acetyltransferase activity	0.000136757	YOL076W, YPR051W
	GO:0034212	peptide N-acetyltransferase activity	0.000136757	YOL076W, YPR051W
Group 310 Density 0			P-value 5.40728176316644E-07
members	partners
YCR092C	YAL027W YAR007C YBR088C YCL056C YDL156W YDR097C YDR224C YDR510W YGL122C YJL173C YLL006W YNR058W YOL090W YPL055C
YJR144W	YAR007C YBL003C YBL045C YCL037C YCR028C-A YDL156W YDL213C YDR097C YDR386W YER148W YER151C YFL002C YFL036W YGL219C YIL035C YIL131C YIR010W YKR016W YLL006W YLR074C YLR427W YMR137C YNL255C YNL312W YNR051C YPL055C YPR161C
YML032C	YAL027W YAL034W-A YAR007C YBR009C YBR073W YCR028C-A YDL013W YDL059C YDL156W YDR097C YDR217C YDR409W YDR510W YER073W YER095W YER116C YGL113W YGL122C YHR121W YIR010W YJL173C YLL006W YLR226W YNL030W YNL312W YPL055C YPL194W YPL240C YPR161C
	GOID	Term	P-value	The genes annotated to this term
BP	GO:0006310	DNA recombination	3.21816e-05	YCR092C, YJR144W, YML032C
	GO:0006281	DNA repair	6.91874e-05	YCR092C, YJR144W, YML032C
	GO:0006312	mitotic recombination	9.24623e-05	YCR092C, YML032C
CC	GO:0005694	chromosome	0.000229963	YCR092C, YJR144W, YML032C
MF	GO:0003690	double-stranded DNA binding	5.40728e-07	YCR092C, YJR144W, YML032C
	GO:0000739	DNA strand annealing activity	3.09145e-06	YJR144W, YML032C
	GO:0003697	single-stranded DNA binding	0.000186832	YJR144W, YML032C
Group 312 Density 0			P-value 0.000428215113869637
members	partners
YBR028C	YBR031W YBR084W YCR016W YEL029C YER015W YGL059W YGL122C YHR135C YIL144W YJL164C YJR059W YJR082C YNR046W YOL041C
YBR157C	YBL032W YBR009C YBR010W YBR233W-A YCL037C YGL059W YGL075C YJL164C YJR059W YKL089W YKR083C YNL030W YNL031C
YDL223C	YBL032W YFR004W YGL059W YHR135C YIL095W YJL095W YJL164C YJR059W YKL101W YLL039C YMR001C YNL154C YNR032C-A YPL141C
YDR042C	YBR160W YGL059W
YDR070C	YFL017C YGL059W YGL122C YJL164C YJR059W YKR016W YNL255C
YER078C	YAR007C YDR226W YDR386W YGL059W YJL164C YJR059W YML036W
YFL050C	YGL059W YGL180W YHR135C YJL164C YJR059W YLL061W YOL130W
YFR017C	YBL032W YCL037C YER177W YFR014C YGL059W YGL122C YJL164C YJR059W YKL166C YNL197C YNL289W YPL026C YPL031C YPL203W YPR184W
YGL205W	YDR128W YDR244W YER021W YFR014C YGL059W YJL095W YJL164C YJR059W YLL039C
YGR008C	YCL037C YGL059W YGL122C YGL213C YIL143C YJL164C YJR059W
YGR038W	YBR058C-A YDR062W YGL059W YGL179C YIR038C YJL164C YJL187C YJR059W YKL008C YKL126W YKL212W YLR350W YML029W YMR296C
YGR257C	YCL037C YER118C YGL059W
YGR266W	YDL095W YGL059W YJL164C YJR059W YLL039C YMR106C YOR153W YOR181W
YHR207C	YBR009C YBR010W YBR059C YDR477W YDR490C YGL059W YGL122C YJL164C YJR059W YLR096W YNL030W YNL031C YNL154C
YIL042C	YER178W YGL059W YJL098W YJL124C
YJL070C	YDR504C YGL059W YGL122C YJL164C YJR059W YKL166C YML035C YMR131C YNL298W YNR016C YPL031C
YJR001W	YBR068C YBR161W YDR069C YFR014C YGL059W YGL122C YHR135C YJL164C YJR059W YKL116C YKL166C YLL039C YNR075W YOR098C YPL031C YPL203W
YJR049C	YDR247W YEL041W YGL059W YGL122C YJL164C YJR059W YLL039C YOR009W YOR351C YPL026C
YKL064W	YBL016W YDL149W YFR014C YGL059W YGL122C YIL035C YJL164C YJR059W YKL166C YLL039C YLR138W YMR216C YNL255C YNL307C YPL031C YPL153C YPL203W
YKR090W	YBR160W YGL059W YGL179C YJL164C YJL203W YJR059W YLR096W YPL031C YPL204W YPR165W
YKR100C	YDL100C YDL222C YGL059W YJL106W YJL164C YJR059W YLL039C YLR096W
YLL029W	YCR086W YDR409W YFR004W YGL059W YGL122C YGL220W YGR185C YJL164C YJR059W YLL024C YLL039C YOR138C YPL240C
YLL038C	YGL059W YJL164C YJR059W YNL255C
YLR195C	YCL037C YGL059W YGL122C YHR200W YJR059W YKL101W YLL024C YLL039C YNL255C YOR244W
YNR039C	YBL032W YDR205W YGL059W YHR103W YJL164C YJR059W YLR096W YNL197C YOR174W
YOR002W	YBL032W YCL037C YER125W YGL059W YKL166C
YOR113W	YBL032W YBR009C YBR010W YCR028C-A YDL156W YFR014C YGL059W YHL007C YHR079C YJL164C YJR059W YNL030W YNL031C YPL203W
YOR134W	YBL032W YGL059W YJL164C YKL166C YPR165W
YPL056C	YBL032W YGL059W YGL122C YJL164C YKL166C
	GOID	Term	P-value	The genes annotated to this term
BP	GO:0030001	metal ion transport	0.000428215	YGR257C, YKL064W, YFL050C, YNR039C
CC	No terms were found for this aspect with a corrected P-value <= 0.05.
MF	No terms were found for this aspect with a corrected P-value <= 0.05.
Group 314 Density 5.263158e-03			P-value 1.12979543519208E-06
members	partners
YAL054C	YAR035W YDR216W YLL039C YLR049C YNL189W
YCR020C	YGL122C YLR291C
YDR051C	YGL122C YLR024C YLR291C YNL255C
YDR428C	YER123W YGL122C YJL014W YLL036C YLR291C
YDR487C	YCL037C YDR513W YER151C YGL122C YNL189W
YFR047C	YDL012C YGL122C YNL189W YNL255C
YGL175C	YCR086W YDL155W YDR388W YDR510W YGL122C YJL092W YJR058C YLR291C YLR442C YMR001C YNL189W YPR119W
YGR024C	YBR060C YDR515W YGL158W YHR112C YKL090W YLR291C YNL189W YNL255C YPL110C
YGR144W	YBR109C YIL051C YLR291C YNL189W YPL031C
YHR112C	YBR261C YER125W YFR014C YGR024C YHR135C YIL030C YJR059W YKL012W YLL039C YLR291C YNL189W YPL031C YPR110C
YJL218W	YBR261C YDR132C YER125W YIL030C YJL164C YJR121W YLR291C YML064C YNL189W YPL031C YPL070W YPL209C
YJR010W	YHR156C YLR291C YNL189W
YLL057C	YGL122C YGL158W YLR291C
YLR209C	YAL005C YDL229W YGL122C YLL024C YNL189W
YLR245C	YAR014C YBR111C YBR261C YIL109C YLR291C YNL189W YNL288W YOL111C YPL070W
YML042W	YBR261C YDL239C YDR244W YER056C-A YGL122C YGL158W YGL187C YKL101W YKR016W YLR291C YNL189W YPL070W YPL209C YPL240C
YNL331C	YER118C YNL189W
YOR095C	YBR261C YLR291C YNL189W YNL255C YNL288W YOR160W YOR265W
YOR380W	YDL239C YFL033C YGL111W YGR261C YJL025W YKL019W YLR291C YMR308C YMR314W YNL189W YPL031C
YPL088W	YBR261C YFR004W YGL122C YLR291C YMR308C YNL098C YNL189W YOL113W YOR160W YOR226C YPL026C YPL070W YPL125W
	GOID	Term	P-value	The genes annotated to this term
BP	GO:0044281	small molecule metabolic process	1.1298e-06	YHR112C, YAL054C, YJR010W, YML042W, YLR209C, YFR047C, YLR245C, YOR095C, YDR487C, YDR428C, YGR144W, YCR020C
	GO:0046483	heterocycle metabolic process	6.97779e-06	YLR209C, YFR047C, YLR245C, YDR487C, YOR095C, YDR428C, YGR144W, YCR020C
	GO:0009435	NAD biosynthetic process	7.37674e-06	YDR428C, YLR209C, YFR047C
CC	No terms were found for this aspect with a corrected P-value <= 0.05.
MF	GO:0003824	catalytic activity	1.41622e-05	YGL175C, YAL054C, YNL331C, YJL218W, YFR047C, YLR245C, YOR095C, YDR428C, YLL057C, YHR112C, YPL088W, YGR024C, YJR010W, YML042W, YLR209C, YDR487C, YDR051C
	GO:0018456	aryl-alcohol dehydrogenase (NAD+) activity	0.00025826	YPL088W, YNL331C
	GO:0016763	transferase activity, transferring pentosyl groups	0.00123336	YLR209C, YFR047C
Group 316 Density 5.486065e-04			P-value 3.17949987388064E-17
members	partners
YAL008W	YCL037C YGL122C YJL033W YML086C YPL186C
YAL025C	YCL037C YDR087C YDR510W YFL002C YGL111W YGL122C YGR103W YHR066W YIR010W YKL021C YLR009W YML065W YNL110C YNL255C YNR051C YOR005C YOR267C
YAL030W	YAL014C YBL050W YBR080C YBR200W YCL037C YDL192W YDR027C YDR164C YDR189W YDR468C YDR515W YER143W YGL122C YGR009C YGR142W YJL036W YJL204C YLL039C YMR183C YNL255C YNR049C YOR036W YPL232W YPR032W
YAL033W	NME1 YBL018C YBR167C YBR257W YCL037C YGL122C YGR030C YHR062C YIR015W YLR145W YNL221C YNL282W
YAL044C	YCL037C YGL122C YKR016W YLR239C YNL255C
YAL044W-A	YCL037C YDR098C YER174C YGL122C YNL218W YNL249C
YAL060W	YAL061W YDR510W YER081W YFR004W YGL122C YLL039C YNL255C YPL031C
YAL061W	YAL060W YGL122C YMR308C YNL255C
YAR033W	YCL037C YDR515W YGL051W YGL122C YGR260W YHL048W YIL109C YKL174C YLL028W YPL076W YPR113W YPR198W
YBL001C	YCL037C YDR515W YGL122C YML102W YNL255C
YBL006C	YBR009C YBR010W YCL037C YDR489W YDR510W YDR515W YGL122C YGR275W YIL126W YLR321C YML127W YMR033W YNL030W YNL031C YNL255C YPL082C
YBL010C	YCL037C YHR082C YKL171W YKL193C YKR022C YNL154C YNL255C YNL317W YPL018W YPR046W
YBL025W	YBL003C YBR009C YBR010W YBR274W YCL037C YDL113C YDR225W YDR247W YFR028C YGL122C YLR141W YMR270C YNL030W YNL031C YNL255C
YBL028C	YCL037C YDR515W YFL002C YGL122C YKL172W YKR081C
YBL059C-A	YGL122C YKL137W YNL255C
YBL059W	YCL037C YDR515W YGL070C
YBL067C	YAL005C YER030W YFR004W YGL122C YHL002W YHR082C YJL203W YML105C YNL255C YOL087C
YBL068W	YCL037C YDR515W YER099C YGL122C YHR030C YKL181W YLL039C YNL124W YOL061W
YBL091C	YCL037C YGR142W YML010W YNL255C YNL290W
YBL091C-A	YDR479C YDR515W YGL122C YIR038C YML029W YNL197C YOL113W YPL094C
YBL095W	YCL037C YCL057C-A YGL122C YJL187C YKR016W YPL209C
YBL107C	YDR515W YGL122C YNL255C
YBR002C	YBL011W YBR041W YBR177C YCL037C YDL052C YHR072W YJL151C YKL140W YKR067W YMR149W YNL255C YPR113W
YBR005W	YER125W YGL122C YLL039C YNL255C
YBR014C	YCL037C YDL100C YDR515W YGL122C
YBR016W	YBL032W YDR515W YGL120C YGL122C YKR016W YLL039C
YBR022W	YCL037C YGL122C
YBR035C	YCL037C YDL101C YDL214C YFL033C YFR004W YGL122C YJR059W YLL039C YOR244W YPL240C
YBR046C	YCL037C YDR515W YLL039C YNL172W YNL255C
YBR047W	YDR238C YDR515W YGL122C
YBR062C	YGL122C YMR083W YNL255C
YBR070C	YBR243C YCL037C YDR515W YGL047W YGL122C YGR036C YPR183W
YBR077C	YCL037C YGL122C YGR163W YGR201C YKR007W YKR039W YML121W YMR004W
YBR084C-A	YBL007C YBL039C YCL037C YCR057C YDR412W YDR515W YER151C YGL122C YGL246C YHL030W YKL135C YKR081C YLL039C YLR029C YML065W YNL069C YNL255C YNR051C YPR016C
YBR090C	YCL037C YDR515W YGL122C YHR135C YNL255C
YBR091C	YCL037C YDL217C YEL020W-A YGL122C YHR005C-A YJL054W YKL195W YNL255C YNR017W YOR297C
YBR120C	YBR017C YCL037C YGL122C YKR016W YKR026C YNL255C YPL215W
YBR129C	YDL059C YGL122C YIL095W YLL039C YNL255C YOL016C YOR181W
YBR137W	YAR007C YCL037C YDR335W YGL122C YML064C YMR047C YNL189W YOL111C YOR007C YOR164C
YBR149W	YBL005W YBR055C YDR510W YDR515W YFR004W YGL122C
YBR150C	YBL007C YDR388W YGL122C YLR106C YNL255C YOL089C YOR174W YPR110C
YBR153W	YCL037C YGL122C
YBR162W-A	YBL032W YGL122C YNL255C YPL094C
YBR171W	YAL028W YBR283C YCL001W YCL037C YDL095W YER053C YGL122C YHL042W YJL034W YJR160C YKL065C YLR026C YLR292C YLR378C YML064C YML105C YNL255C YNL291C YOR254C YOR324C YPL076W YPL094C YPL227C YPR088C
YBR187W	YCL037C YCR061W YDR381W YDR412W YGL122C YGL137W YLL039C YNL255C YNR032W YOL041C YOR294W YPL217C YPR112C
YBR210W	YDR515W YGL122C YGL207W YGR284C YLL039C
YBR237W	YDR073W YER021W YGL122C YGL181W YHR059W YMR125W YMR288W YNL154C YNL255C
YBR244W	YBR052C YCL037C YCR086W YDL222C YGL122C YGR055W YKL051W YLR117C YLR345W YPL058C YPR156C
YBR252W	YBR135W YBR274W YDL079C YGL122C YLR291C YML064C YNL255C YNL298W YOL061W YOL113W
YBR255C-A	YBL045C YGL122C YGR014W YJR108W YJR131W YKL037W YKR016W YNL255C
YBR256C	YCL037C YDR515W YGL122C YNL255C
YBR262C	YBL099W YCL037C YCL057C-A YDR515W YFR011C YGL122C YGR132C YGR231C YGR235C YIL136W YJL066C YKR016W YLL039C YMR145C YNL055C YNL100W YNL255C
YBR263W	YCL037C YER151C YFR031C-A YGL122C YIR010W YJL115W YKR016W YLL039C
YBR264C	YAR010C YDR515W YER136W YGL122C YGL198W YJL187C YLL039C YLR262C YML001W YNL044W YNL255C YNL263C YOR089C YOR370C
YBR268W	YCL037C YDL202W YDR515W YGL122C YNL185C YNL255C
YBR269C	YCL037C YDR515W YGL122C YNL255C
YBR278W	YCL032W YCL037C YDL102W YDR121W YDR381W YDR388W YGL122C YMR224C YNL255C YNL262W YOL077C YPR175W
YBR291C	YCL037C YDR515W YHR096C YJR010C-A YLL005C YLR435W
YCL001W	YAR002C-A YBR171W YCL037C YDL145C YDR515W YGL122C YJR131W YLL039C YLR026C YMR058W YNR026C YPL227C
YCL005W-A	YCL037C YDR515W YGL122C YGR105W YOR270C
YCL009C	YAL024C YCL037C YDR515W YER012W YER110C YER151C YFR004W YGL116W YGL122C YGR092W YKL010C YKR016W YLL039C YML065W YMR108W YNL157W YNL212W YNR051C
YCL033C	YCL037C YDR515W YGL122C YKL103C YNL255C YOL082W
YCL034W	YBL007C YCL037C YDR515W YGL122C YHR016C YHR114W YLL039C YNL255C YOR094W YOR181W
YCL035C	YAR019C YCL024W YCL037C YDR507C YFR004W YGL122C YKL126W YKL198C YLL039C YMR059W YNL255C YPL240C
YCL052C	YBR036C YBR290W YCL037C YDR515W YEL060C YEL063C YGL122C YGR260W YGR281W YHR026W YHR140W YHR142W YJL108C YJR010C-A YJR106W YLR268W
YCL057W	YCL037C YGL122C YLL039C YNL064C YNL307C
YCR003W	YCL037C YDR322W YDR515W YER017C YGL122C YNL005C
YCR020C-A	YBL026W YCL037C YEL053C YGL122C YIL119C YJR022W YKL025C YNL255C YPR051W
YCR027C	YBR059C YCL032W YDR515W YGL122C YNL255C YOL083W
YCR036W	YFR004W YGL122C YGL153W YNL255C
YCR043C	YAL023C YBL002W YBL075C YBL102W YBR009C YCL037C YCR009C YDL053C YDL095W YDR100W YDR174W YDR264C YDR381W YDR388W YDR503C YDR515W YEL036C YFL062W YGL122C YHR123W YJL151C YLR429W YMR010W YMR272C YMR292W YNL255C YPL146C YPL246C
YCR044C	YCL037C YDR331W YDR515W YHR140W
YCR047C	YBR049C YCL037C YDR515W YMR128W YNL255C
YCR051W	YCL037C YDR515W YER184C YFR004W YLL039C YNL255C
YCR060W	RP1-302G2.1 YCL028W YCL037C YDR190C YGL122C YHR034C YKL117W YLR197W YMR186W YMR309C YNL255C YOR310C YPL235W YPL240C
YCR071C	YBL038W YBR122C YCL037C YCR046C YDR116C YDR237W YDR296W YDR322W YDR405W YDR462W YDR515W YFL002C YGL122C YGR076C YGR220C YHL004W YJL063C YKL167C YKR006C YKR085C YLR312W-A YLR439W YML025C YMR024W YMR193W YNL005C YNL252C YNL255C YNL284C YOL027C YOR150W YOR361C YPL173W YPR125W
YCR076C	YBL041W YCL037C YDR515W YER094C YFR050C YGL137W YGR135W YML092C YMR314W YNL118C YNL189W YNL255C YOL038W YPR103W
YCR083W	YCL037C YCR086W YDR353W YDR448W YGL122C YHR106W YKR016W YNL255C
YCR090C	YCL037C YGL122C YML105C
[truncated: 3,777 more rows]
